# Supplementary material for: Mechanism of C–P bond formationviaPd-catalyzed decarbonylative phosphorylation of amides: insight into the chemistry of the second coordination sphere
Source: Royal Society of Chemistry journal article supplement (doi:10.1039/c9cc07923h), 2019-11-25
Supplement: c9cc07923h1.pdf [file c9cc07923h1.pdf]

## Electronic Supplementary Information

### Mechanism of C–P bond formation *via* Pd-catalyzed decarbonylative phosphorylation of amides: insight into chemistry in the second coordination sphere

Wen-Yan Tong,<sup>a</sup> Thu D. Ly,<sup>b</sup> Tao-Tao Zhao,<sup>a</sup> Yan-Bo Wu<sup>\*,a</sup> and Xiaotai Wang<sup>\*,b,c</sup>

<sup>a</sup> The Key Laboratory of Energy Conversion and Storage of Shanxi Province, Institute of Molecular Science, Shanxi University, Taiyuan, 030006, Shanxi, People's Republic of China.

<sup>b</sup> Department of Chemistry, University of Colorado Denver, Campus Box 194, P.O. Box 173364, Denver, Colorado 80217-3364, United States

<sup>c</sup> Hoffmann Institute of Advanced Materials, Shenzhen Polytechnic, 7098 Liuxian Boulevard, Nanshan District, Shenzhen 518055, P. R. China

Email address: [wyb@sxu.edu.cn](mailto:wyb@sxu.edu.cn)

Email address: [Xiaotai.Wang@ucdenver.edu](mailto:Xiaotai.Wang@ucdenver.edu)

| Contents                                                              | Pages  |
|-----------------------------------------------------------------------|--------|
| ▪ Fig. S1 Optimized structure of <i>N</i> -benzoylglutarimide         | S2     |
| ▪ Fig. S2 Optimized structure of <b>1cat</b>                          | S2     |
| ▪ Fig. S3 Optimized structures of <b>2a–2d</b>                        | S2     |
| ▪ Fig. S4 Reaction pathway through <b>2b</b>                          | S3     |
| ▪ Fig. S5 Reaction pathway through <b>2c</b>                          | S4     |
| ▪ Fig. S6 Reaction pathway through <b>2d</b>                          | S5     |
| ▪ Fig. S7 IRC plot                                                    | S6     |
| ▪ Cartesian coordinates, electronic energies, and Gibbs free energies | S7–S99 |

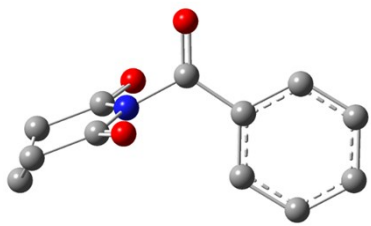

**Fig. S1** Optimized structure of *N*-benzoylglutarimide. Color scheme: C grey, N blue, and O red (the same below). Hydrogen atoms are omitted for clarity (the same below).

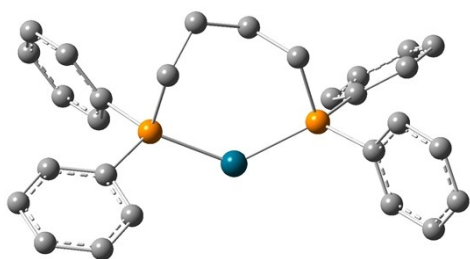

**Fig. S2** Optimized structure of **1cat**. Color scheme: Pd green and P yellow (the same below). Bond angle P–Pd–P = 126.45°.

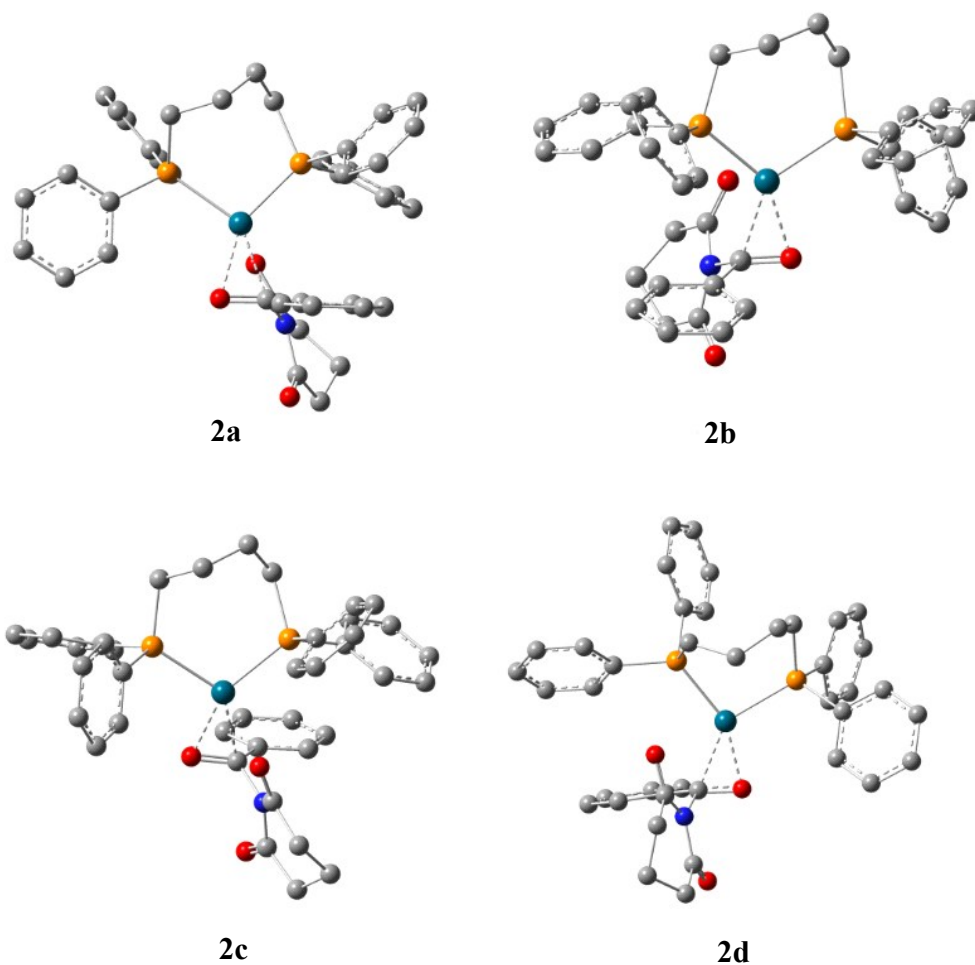

**Fig. S3** Optimized structures of **2a–2d**.



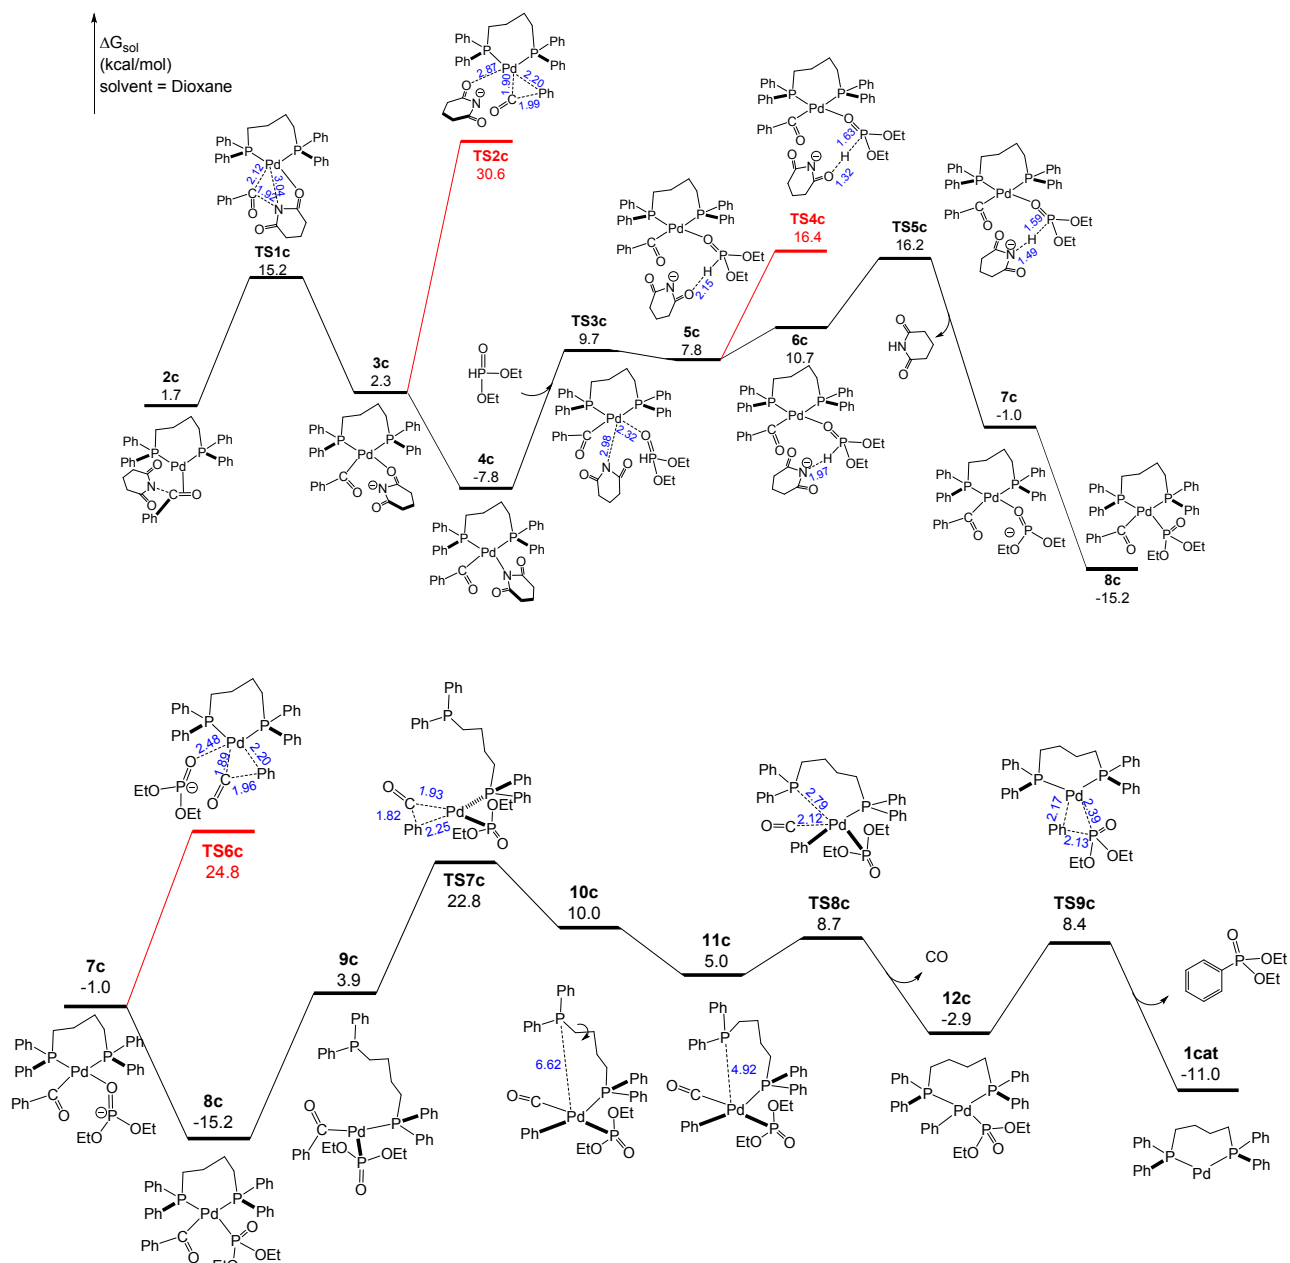

Fig. S5 Reaction pathway through **2c**.

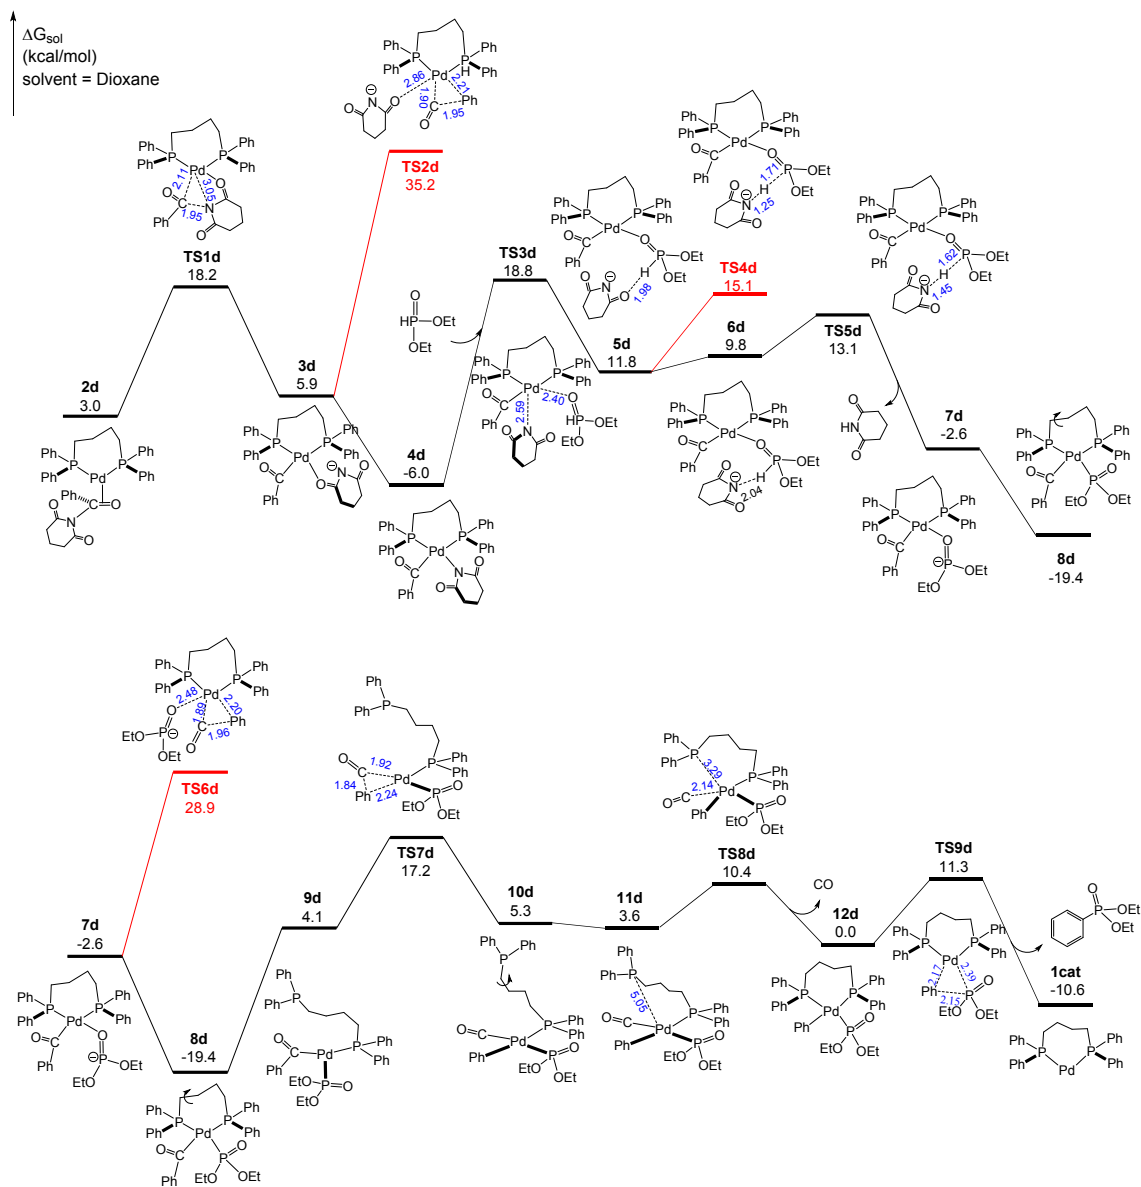

**Fig. S6** Reaction pathway through **2d**.

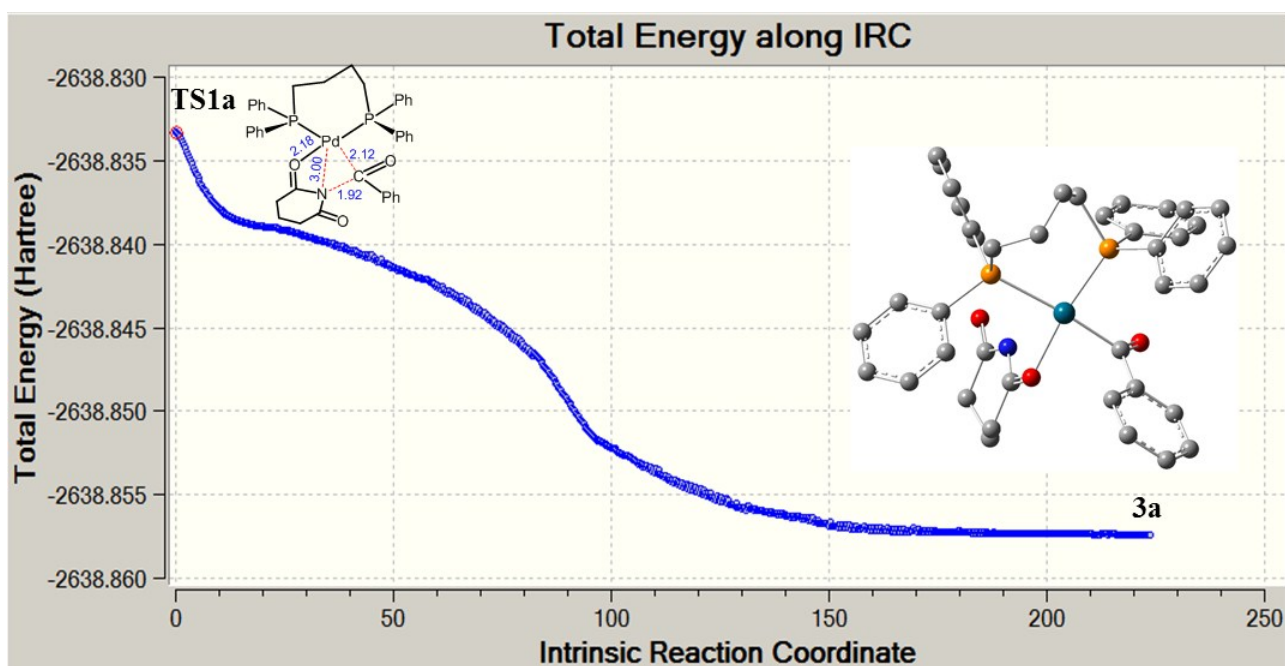

Fig. S7 B3LYP/6-31G(d,p)-computed IRC plot showing the TS1a→3a connection.

## Cartesian Coordinates, SCF Energies (a.u.), and Free Energies (a.u.) at 298.15 K and 1 atm

|                                         |             |             |             |                                         |             |             |             |
|-----------------------------------------|-------------|-------------|-------------|-----------------------------------------|-------------|-------------|-------------|
| <b>dppb</b>                             |             |             |             | C                                       | 4.09433400  | 3.50455900  | -0.57600500 |
| SCF energy: -1766.516766                |             |             |             | H                                       | 3.97468300  | 1.63202500  | -1.61960900 |
| SCF energy in solution: -1765.94321278  |             |             |             | C                                       | 2.75318000  | 3.69529500  | 1.41886200  |
| Free energy in solution: -1765.52622978 |             |             |             | H                                       | 1.60044400  | 1.97103400  | 1.96037800  |
| P                                       | 2.12281200  | -0.08929700 | -0.23714400 | C                                       | 3.65397200  | 4.25834900  | 0.51586600  |
| C                                       | -1.86805400 | -1.83672200 | 0.72573900  | H                                       | 4.79368600  | 3.93403900  | -1.28894300 |
| H                                       | -2.02562200 | -2.00496800 | 1.79950200  | H                                       | 2.40165400  | 4.27297000  | 2.27021600  |
| H                                       | -2.62614400 | -2.44588500 | 0.21704300  | H                                       | 4.00760100  | 5.27628200  | 0.65695500  |
| C                                       | 1.20768400  | -0.55043400 | 1.33956200  | C                                       | 3.67314200  | -1.09107100 | -0.02379500 |
| H                                       | 1.86940800  | -0.41479700 | 2.20487600  | C                                       | 4.64748000  | -0.82297300 | 0.95275600  |
| H                                       | 0.37357700  | 0.15170200  | 1.44648500  | C                                       | 3.86655200  | -2.18841000 | -0.87714400 |
| C                                       | -0.45459800 | -2.31633700 | 0.32646600  | C                                       | 5.77672500  | -1.63254200 | 1.07411600  |
| H                                       | -0.19250900 | -1.93838600 | -0.66949200 | H                                       | 4.52710300  | 0.03155800  | 1.61347600  |
| H                                       | -0.50394700 | -3.40952600 | 0.22925400  | C                                       | 4.99395900  | -3.00509100 | -0.75311200 |
| C                                       | 0.67781000  | -1.99780900 | 1.32385300  | H                                       | 3.13019200  | -2.39934000 | -1.64908100 |
| H                                       | 0.33188700  | -2.24840300 | 2.33705500  | C                                       | 5.95148100  | -2.72759000 | 0.22265900  |
| H                                       | 1.51699900  | -2.67585500 | 1.12111300  | H                                       | 6.52287600  | -1.40906200 | 1.83268500  |
| P                                       | -2.25332500 | -0.01523400 | 0.45139200  | H                                       | 5.12600300  | -3.85108900 | -1.42286200 |
| C                                       | -2.42880400 | 0.10760400  | -1.38900900 | H                                       | 6.83277600  | -3.35668400 | 0.31779200  |
| C                                       | -2.54594800 | -0.98036700 | -2.26910400 | <b>[Pd(dppb)] (1cat)</b>                |             |             |             |
| C                                       | -2.41972200 | 1.40339900  | -1.93446500 | SCF energy: -1894.503537                |             |             |             |
| C                                       | -2.66176000 | -0.77825100 | -3.64674700 | SCF energy in solution: -1893.91329973  |             |             |             |
| H                                       | -2.54540200 | -1.99732600 | -1.88846900 | Free energy in solution: -1893.49594073 |             |             |             |
| C                                       | -2.54801100 | 1.60818900  | -3.30795400 | P                                       | 2.05438300  | 0.15684300  | 0.08484600  |
| H                                       | -2.30469300 | 2.25903800  | -1.27309300 | C                                       | -1.56268100 | -0.16012300 | 1.89785600  |
| C                                       | -2.66800800 | 0.51554600  | -4.16953600 | H                                       | -1.22020800 | 0.82258700  | 2.24437400  |
| H                                       | -2.74739300 | -1.63469800 | -4.31090600 | H                                       | -2.44586300 | -0.41964900 | 2.49404300  |
| H                                       | -2.54246000 | 2.61944500  | -3.70624700 | C                                       | 1.66331500  | 0.38737400  | 1.91475700  |
| H                                       | -2.75751900 | 0.67125500  | -5.24140000 | H                                       | 2.59533600  | 0.58506300  | 2.46118400  |
| C                                       | -4.02021100 | -0.00914800 | 1.02513600  | H                                       | 1.09615400  | 1.32562500  | 1.93742400  |
| C                                       | -5.09991700 | -0.48316400 | 0.26334600  | C                                       | -0.45162900 | -1.22912100 | 2.08447200  |
| C                                       | -4.27645100 | 0.48809700  | 2.31297000  | H                                       | -0.25840900 | -1.74133200 | 1.13501100  |
| C                                       | -6.39653400 | -0.46880000 | 0.77955900  | H                                       | -0.81927900 | -2.00125600 | 2.77191500  |
| H                                       | -4.92858600 | -0.85575200 | -0.74268800 | C                                       | 0.88958800  | -0.72403600 | 2.65781400  |
| C                                       | -5.57164400 | 0.49428600  | 2.83492000  | H                                       | 0.71565200  | -0.35409300 | 3.67929400  |
| H                                       | -3.45423400 | 0.87901900  | 2.90820500  | H                                       | 1.54557200  | -1.59753700 | 2.76345400  |
| C                                       | -6.63529500 | 0.01645500  | 2.06769600  | P                                       | -2.04576900 | 0.05848700  | 0.09218200  |
| H                                       | -7.22212300 | -0.83570100 | 0.17470600  | C                                       | -3.10969400 | -1.43568000 | -0.19106200 |
| H                                       | -5.75037200 | 0.88101100  | 3.83502800  | C                                       | -4.36471000 | -1.60459600 | 0.41599700  |
| H                                       | -7.64582500 | 0.02821100  | 2.46781300  | C                                       | -2.62809600 | -2.44654800 | -1.03582900 |
| C                                       | 2.73372900  | 1.61506600  | 0.15046300  | C                                       | -5.11472200 | -2.75812600 | 0.18717200  |
| C                                       | 3.63212600  | 2.20322500  | -0.75960100 |                                         |             |             |             |
| C                                       | 2.29872200  | 2.38494400  | 1.24025000  |                                         |             |             |             |

|                                    |                |             |             |                          |                |             |             |
|------------------------------------|----------------|-------------|-------------|--------------------------|----------------|-------------|-------------|
| H                                  | -4.76626200    | -0.82589700 | 1.05949300  | Free energy in solution: | -2121.99418392 |             |             |
| C                                  | -3.37572200    | -3.60537800 | -1.26042000 | P                        | -2.04118100    | 0.07442600  | -0.44124500 |
| H                                  | -1.66293900    | -2.31428500 | -1.51960800 | C                        | 1.24551700     | -0.68633000 | -2.44311700 |
| C                                  | -4.62050400    | -3.76250900 | -0.65002200 | H                        | 0.87974500     | 0.21769800  | -2.94440300 |
| H                                  | -6.08730300    | -2.87247400 | 0.65935400  | H                        | 2.08538600     | -1.05099800 | -3.04846400 |
| H                                  | -2.98777200    | -4.37966500 | -1.91734500 | C                        | -1.89846800    | -0.04272300 | -2.32471900 |
| H                                  | -5.20723400    | -4.65987600 | -0.82874200 | H                        | -2.88723300    | 0.07253200  | -2.79122400 |
| C                                  | -3.29169400    | 1.42673100  | 0.14418800  | H                        | -1.30679900    | 0.83306000  | -2.61898400 |
| C                                  | -3.83594300    | 1.95914900  | 1.32364100  | C                        | 0.12464300     | -1.75410000 | -2.36098600 |
| C                                  | -3.69091800    | 1.98004300  | -1.08489200 | H                        | 0.00242400     | -2.08119500 | -1.32227600 |
| C                                  | -4.75832400    | 3.00829400  | 1.27402100  | H                        | 0.42902300     | -2.64506600 | -2.92782000 |
| H                                  | -3.54524900    | 1.56148800  | 2.29105800  | C                        | -1.25456900    | -1.32149500 | -2.89979000 |
| C                                  | -4.62052100    | 3.01753000  | -1.13574000 | H                        | -1.17893800    | -1.18307900 | -3.98992000 |
| H                                  | -3.25924200    | 1.59545000  | -2.00628000 | H                        | -1.94916800    | -2.15879100 | -2.74905600 |
| C                                  | -5.15614900    | 3.53696800  | 0.04595400  | P                        | 1.77853900     | -0.11461900 | -0.73284300 |
| H                                  | -5.16622000    | 3.40975800  | 2.19834700  | C                        | 2.95627700     | -1.46498200 | -0.20867200 |
| H                                  | -4.91858000    | 3.42872200  | -2.09673200 | C                        | 3.31676900     | -2.56600700 | -1.00046300 |
| H                                  | -5.87327600    | 4.35273300  | 0.00887300  | C                        | 3.46520400     | -1.38717200 | 1.10302000  |
| C                                  | 3.25639400     | 1.55382400  | -0.14316600 | C                        | 4.17050000     | -3.55800800 | -0.50783800 |
| C                                  | 4.64479000     | 1.43872200  | 0.02198900  | H                        | 2.93459900     | -2.66472700 | -2.01223500 |
| C                                  | 2.72309100     | 2.80428000  | -0.49946200 | C                        | 4.33116000     | -2.36933800 | 1.58373700  |
| C                                  | 5.47594300     | 2.54696300  | -0.15708000 | H                        | 3.16688300     | -0.55950400 | 1.74742200  |
| H                                  | 5.08500000     | 0.48075200  | 0.28130700  | C                        | 4.68640500     | -3.46044500 | 0.78429300  |
| C                                  | 3.55223300     | 3.91437800  | -0.66326600 | H                        | 4.43219300     | -4.40539400 | -1.13920500 |
| H                                  | 1.65096400     | 2.89810000  | -0.66026900 | H                        | 4.71885300     | -2.28727200 | 2.59689600  |
| C                                  | 4.93294300     | 3.78781200  | -0.49451700 | H                        | 5.35189300     | -4.23093900 | 1.16851600  |
| H                                  | 6.55054900     | 2.43812200  | -0.03274700 | C                        | 2.98088700     | 1.25070200  | -1.13323700 |
| H                                  | 3.12085400     | 4.87409300  | -0.93621400 | C                        | 3.48856400     | 1.51451000  | -2.41548900 |
| H                                  | 5.58192900     | 4.64851500  | -0.63353600 | C                        | 3.35929200     | 2.09241200  | -0.07027900 |
| C                                  | 3.11324900     | -1.35887700 | 0.04193700  | C                        | 4.35309600     | 2.59022300  | -2.63631900 |
| C                                  | 3.92482600     | -1.77971600 | 1.10895000  | H                        | 3.21776700     | 0.87964200  | -3.25448200 |
| C                                  | 3.08651500     | -2.13847100 | -1.12550100 | C                        | 4.23619500     | 3.15555400  | -0.29352300 |
| C                                  | 4.69133900     | -2.94265300 | 1.00765000  | H                        | 2.96309600     | 1.90373500  | 0.92872600  |
| H                                  | 3.96539400     | -1.19921900 | 2.02634700  | C                        | 4.73219000     | 3.41314800  | -1.57451800 |
| C                                  | 3.85861800     | -3.29642100 | -1.23182800 | H                        | 4.73320400     | 2.78033700  | -3.63858300 |
| H                                  | 2.44543900     | -1.83237100 | -1.94884200 | H                        | 4.52292100     | 3.79292000  | 0.54014500  |
| C                                  | 4.66150100     | -3.70206300 | -0.16394500 | H                        | 5.40619000     | 4.25039600  | -1.74509200 |
| H                                  | 5.31137800     | -3.25494200 | 1.84414600  | C                        | -3.36850400    | 1.37996600  | -0.31821300 |
| H                                  | 3.82638300     | -3.88526100 | -2.14479600 | C                        | -4.09949000    | 1.47493300  | 0.88208300  |
| H                                  | 5.25716900     | -4.60780700 | -0.24148200 | C                        | -3.59169800    | 2.36294000  | -1.29735400 |
| Pd                                 | -0.00037800    | 0.21278700  | -0.94092400 | C                        | -5.03310300    | 2.48814500  | 1.08191800  |
|                                    |                |             |             | H                        | -3.92147800    | 0.74657400  | 1.66956500  |
|                                    |                |             |             | C                        | -4.51741500    | 3.39100200  | -1.09179600 |
|                                    |                |             |             | H                        | -3.03881300    | 2.33752300  | -2.23157000 |
|                                    |                |             |             | C                        | -5.24770900    | 3.45633700  | 0.09400000  |
|                                    |                |             |             | H                        | -5.58866600    | 2.53082800  | 2.01635900  |
| <b>[Pd(dppb)(OAc)]<sup>-</sup></b> |                |             |             |                          |                |             |             |
| SCF energy:                        | -2123.048568   |             |             |                          |                |             |             |
| SCF energy in solution:            | -2122.45066392 |             |             |                          |                |             |             |



|    |             |             |             |   |             |             |             |
|----|-------------|-------------|-------------|---|-------------|-------------|-------------|
| H  | -4.66707200 | 4.14067900  | -1.86654100 | C | -5.33006700 | -2.29618800 | -1.47934100 |
| H  | -5.96822000 | 4.25525200  | 0.25377400  | H | -5.00113900 | -1.43142300 | 0.46006500  |
| C  | -3.07202400 | -1.45128900 | -0.11229700 | C | -4.78509600 | -2.57639200 | -2.73546600 |
| C  | -4.31308600 | -1.69625500 | -0.72322900 | H | -3.04156200 | -2.41337700 | -3.99485600 |
| C  | -2.57133000 | -2.40340700 | 0.78779900  | H | -6.35648500 | -2.57713200 | -1.25648200 |
| C  | -5.03137300 | -2.86031100 | -0.44504100 | H | -5.38558800 | -3.07720500 | -3.49056200 |
| H  | -4.72760900 | -0.96416600 | -1.41242200 | C | -3.34847300 | 0.65916400  | 1.35719900  |
| C  | -3.28633900 | -3.57218500 | 1.06579300  | C | -4.00298700 | 0.32485200  | 2.55365800  |
| H  | -1.61743900 | -2.20682300 | 1.27350100  | C | -3.59101200 | 1.92570000  | 0.79704800  |
| C  | -4.51749700 | -3.80335900 | 0.45003100  | C | -4.87865500 | 1.22634200  | 3.16600900  |
| H  | -5.99343100 | -3.03152200 | -0.92413900 | H | -3.83586900 | -0.64163000 | 3.01911100  |
| H  | -2.88224400 | -4.29741200 | 1.76848900  | C | -4.47483400 | 2.81997500  | 1.39943500  |
| H  | -5.07763500 | -4.71013900 | 0.66830900  | H | -3.06999700 | 2.20960800  | -0.11470600 |
| Pd | -0.05152400 | 0.28181900  | 0.60961500  | C | -5.12049200 | 2.47343100  | 2.58950300  |
| O  | 0.18708700  | 0.69909900  | 2.82155900  | H | -5.37312900 | 0.94962400  | 4.09397200  |
| C  | 1.27448500  | 1.01840500  | 3.40588900  | H | -4.65151800 | 3.79239700  | 0.94661300  |
| C  | 1.12964600  | 1.22315900  | 4.92996700  | H | -5.80173500 | 3.17324700  | 3.06644100  |
| H  | 0.69807100  | 0.32563600  | 5.38928300  | C | 3.21738700  | 0.30961000  | 1.31933900  |
| H  | 2.09484800  | 1.44554800  | 5.39496300  | C | 4.25760800  | 0.69724600  | 0.45482900  |
| H  | 0.43368800  | 2.04817600  | 5.12619600  | C | 3.21386600  | 0.83175300  | 2.62357900  |
| O  | 2.40720500  | 1.18484200  | 2.90012000  | C | 5.26360900  | 1.56225400  | 0.88310400  |

**[Pd(dppb)(sol)]**

SCF energy: -2202.162834

SCF energy in solution: -2201.47954945

Free energy in solution: -2200.95026545

|   |             |             |             |    |             |             |             |
|---|-------------|-------------|-------------|----|-------------|-------------|-------------|
| P | 1.81510900  | -0.71918600 | 0.66694000  | H  | 6.03201100  | 2.74642800  | 2.51884200  |
| C | -1.88865400 | -1.84271800 | 1.69902200  | C  | 2.72735300  | -2.04101100 | -0.26340300 |
| H | -1.57312400 | -1.37924800 | 2.64177000  | C  | 3.81587900  | -2.74132200 | 0.28356700  |
| H | -2.84312500 | -2.34525800 | 1.89542500  | C  | 2.29797500  | -2.37167400 | -1.55655400 |
| C | 1.29725100  | -1.64472200 | 2.22377400  | C  | 4.45341100  | -3.74657300 | -0.44359800 |
| H | 2.18953000  | -1.89522500 | 2.81262400  | H  | 4.17550600  | -2.49174000 | 1.27855700  |
| H | 0.72261800  | -0.92023000 | 2.81284200  | C  | 2.93510300  | -3.37875100 | -2.28711500 |
| C | -0.83193900 | -2.86662400 | 1.20938300  | H  | 1.45769700  | -1.82898800 | -1.98372000 |
| H | -0.57819800 | -2.67256900 | 0.16127700  | C  | 4.01305500  | -4.06807100 | -1.73108500 |
| H | -1.27541400 | -3.87006100 | 1.23009900  | H  | 5.29529900  | -4.27855700 | -0.00757400 |
| C | 0.47165800  | -2.93443100 | 2.03108100  | H  | 2.58997200  | -3.62157900 | -3.28894500 |
| H | 0.23148200  | -3.30854500 | 3.03730500  | H  | 4.51135300  | -4.85085100 | -2.29716400 |
| H | 1.11535700  | -3.69562300 | 1.57207900  | Pd | -0.06475200 | 0.28262800  | -0.19284100 |
| P | -2.14272800 | -0.43922500 | 0.47180800  | C  | 0.71730500  | 3.67292200  | -3.59085600 |
| C | -3.23674000 | -1.27387300 | -0.77978800 | C  | 0.71415900  | 2.32993800  | -2.86863600 |
| C | -2.70514200 | -1.55152700 | -2.04781200 | C  | 1.02982800  | 3.44839500  | -0.81560900 |
| C | -4.56141500 | -1.65263200 | -0.50904400 | C  | 1.02746900  | 4.78226600  | -1.55303400 |
| C | -3.47032200 | -2.20379700 | -3.01798800 | H  | -0.31803100 | 4.03973600  | -3.69312500 |
| H | -1.68486300 | -1.24373200 | -2.26653800 | H  | 1.73038000  | 1.90662000  | -2.84982000 |

|   |            |            |             |
|---|------------|------------|-------------|
| H | 0.58015500 | 3.53587800 | 0.17710400  |
| H | 1.69424000 | 5.49917300 | -1.06309700 |
| H | 2.05848400 | 3.07253300 | -0.71099000 |
| H | 0.03858000 | 1.61886900 | -3.35305400 |
| H | 1.15679400 | 3.57812100 | -4.58930100 |
| H | 0.00630000 | 5.19916700 | -1.56563700 |
| O | 0.23947800 | 2.49030500 | -1.52992500 |
| O | 1.50533200 | 4.62347900 | -2.88482000 |

**1,4-Dioxane (sol)**

SCF energy: -307.653142

SCF energy in solution: -307.5562929

Free energy in solution: -307.4613749

|   |             |             |             |
|---|-------------|-------------|-------------|
| C | -1.17113700 | 0.73768100  | 0.19446400  |
| C | -1.17113700 | -0.73768300 | -0.19446300 |
| C | 1.17116700  | -0.73769000 | -0.19451400 |
| C | 1.17116600  | 0.73769100  | 0.19451500  |
| H | -1.22429900 | 0.82888100  | 1.29226800  |
| H | -1.22429900 | -0.82888200 | -1.29226800 |
| H | 2.02551500  | -1.26318900 | 0.24455800  |
| H | 2.02551400  | 1.26319100  | -0.24455700 |
| H | 1.22417000  | -0.82867600 | -1.29233500 |
| H | -2.02554300 | -1.26310400 | 0.24468300  |
| H | -2.02554400 | 1.26310200  | -0.24468200 |
| H | 1.22416800  | 0.82867700  | 1.29233600  |
| O | -0.00000100 | -1.38301700 | 0.29335700  |
| O | -0.00000300 | 1.38301700  | -0.29335800 |

**HP(O)(OEt)<sub>2</sub>**

SCF energy: -726.114359

SCF energy in solution: -726.00935865

Free energy in solution: -725.88994465

|   |             |             |             |
|---|-------------|-------------|-------------|
| P | -0.00635600 | 0.93276900  | 0.25016800  |
| H | -0.20488100 | 1.07383800  | 1.64097200  |
| C | 2.38211200  | -0.20955100 | 0.11223600  |
| H | 2.63364600  | 0.56409100  | -0.61871700 |
| H | 2.72216900  | 0.12641200  | 1.10063600  |
| C | -1.97067800 | -0.85813000 | 0.27367300  |
| H | -1.35035000 | -1.70096600 | -0.04746700 |
| H | -1.94630700 | -0.81352700 | 1.37156900  |
| O | 0.46225800  | 2.15239300  | -0.43926300 |
| O | -1.41273300 | 0.35887300  | -0.27100700 |
| O | 0.94252700  | -0.37414400 | 0.14077500  |
| C | 2.99962400  | -1.54802300 | -0.24759100 |

|   |             |             |             |
|---|-------------|-------------|-------------|
| H | 2.73192900  | -2.31225500 | 0.48927300  |
| H | 4.09143900  | -1.45929400 | -0.27335700 |
| H | 2.65493000  | -1.87953300 | -1.23216600 |
| C | -3.39611100 | -0.98737800 | -0.23087800 |
| H | -3.84556200 | -1.91033100 | 0.15231900  |
| H | -3.41440800 | -1.01915100 | -1.32459000 |
| H | -4.00336600 | -0.13930600 | 0.10033000  |

**N-benzoylglutarimide**

SCF energy: -744.339710

SCF energy in solution: -744.08336615

Free energy in solution: -743.91335315

|   |             |             |             |
|---|-------------|-------------|-------------|
| O | 0.27721800  | 2.29165300  | 0.40160900  |
| C | 0.29774000  | 1.10469500  | 0.19392900  |
| C | 1.52309400  | 0.28962700  | 0.05048900  |
| C | 1.49218900  | -1.09150000 | -0.18837300 |
| C | 2.75951100  | 0.94753200  | 0.16204400  |
| C | 2.68212700  | -1.80589100 | -0.31366700 |
| H | 0.54090500  | -1.60487200 | -0.27582100 |
| C | 3.94522700  | 0.23191600  | 0.03607000  |
| H | 2.76429200  | 2.01645400  | 0.34690000  |
| C | 3.90800800  | -1.14608800 | -0.20181700 |
| H | 2.65354200  | -2.87587400 | -0.49847600 |
| H | 4.89915500  | 0.74421500  | 0.12279300  |
| H | 4.83495500  | -1.70471100 | -0.29994300 |
| C | -2.98517200 | -0.63117800 | 1.16321000  |
| C | -2.99044100 | -0.18706600 | -1.30395200 |
| C | -3.29916200 | -1.21876600 | -0.21543300 |
| H | -3.09826900 | -1.36112400 | 1.96923600  |
| H | -3.67822400 | 0.66688700  | -1.21831900 |
| H | -2.70016800 | -2.12389900 | -0.37978800 |
| N | -1.00105500 | 0.38842300  | 0.06857600  |
| C | -1.58088700 | 0.37030100  | -1.21203800 |
| C | -1.57668900 | -0.07246400 | 1.26548600  |
| O | -0.96255000 | 0.79635200  | -2.16834300 |
| O | -0.95572200 | -0.00145300 | 2.30846800  |
| H | -3.10947900 | -0.58960400 | -2.31341100 |
| H | -4.34984500 | -1.52238100 | -0.26770700 |
| H | -3.67431500 | 0.19682500  | 1.38493200  |

**Diethyl phenylphosphonate**

SCF energy: -957.179719

SCF energy in solution: -956.94842

Free energy in solution: -956.753665

|   |             |             |             |   |             |             |             |
|---|-------------|-------------|-------------|---|-------------|-------------|-------------|
| C | 1.19735200  | -0.15889800 | 0.12575200  | H | 4.92980800  | -1.33356200 | 1.35512100  |
| C | 1.61825600  | -0.14832900 | -1.21277600 | H | 5.58447200  | 0.32402500  | -0.37788000 |
| C | 2.14487800  | -0.24575000 | 1.15442500  | P | -0.96056200 | 0.05425300  | -0.42268500 |
| C | 2.97639100  | -0.23142300 | -1.51565700 | C | -2.87909200 | -1.78360600 | -0.36291300 |
| H | 0.88469400  | -0.07657300 | -2.01027800 | H | -2.82285000 | -1.73197800 | -1.45496900 |
| C | 3.50389700  | -0.32743900 | 0.84630300  | H | -2.27524500 | -2.62575400 | -0.01130300 |
| H | 1.80611400  | -0.24816800 | 2.18587800  | C | -1.81842200 | 2.48475200  | 0.22794300  |
| C | 3.91885300  | -0.32136200 | -0.48669200 | H | -1.89965300 | 2.71159600  | -0.84047400 |
| H | 3.30147200  | -0.22570000 | -2.55254800 | H | -2.78676900 | 2.11952200  | 0.58514900  |
| H | 4.23687500  | -0.39564700 | 1.64552500  | O | -0.90951800 | 0.13623900  | -1.90903200 |
| H | 4.97713500  | -0.38548700 | -0.72602800 | O | -0.83704000 | 1.42823500  | 0.40767900  |
| P | -0.54802800 | -0.04776400 | 0.56801500  | O | -2.31200600 | -0.56919200 | 0.19534300  |
| C | -1.12244000 | 2.50734500  | 0.13769300  | C | -4.31454300 | -1.89247900 | 0.11598500  |
| H | -1.48628000 | 2.53563500  | 1.16949800  | H | -4.35706900 | -1.91760700 | 1.20948900  |
| H | -0.07769200 | 2.84419200  | 0.13119600  | H | -4.76559700 | -2.81385500 | -0.26939500 |
| C | -2.57590400 | -1.62928600 | -0.04660500 | H | -4.90803200 | -1.04265000 | -0.23652100 |
| H | -2.82170400 | -1.67145600 | 1.01975100  | C | -1.35176100 | 3.69200400  | 1.01883200  |
| H | -3.15217500 | -0.81871300 | -0.50658700 | H | -2.07597600 | 4.50764900  | 0.91339600  |
| O | -0.80804900 | 0.08254500  | 2.02618300  | H | -0.37998800 | 4.04161000  | 0.65625000  |
| O | -1.16455400 | -1.33184600 | -0.18982200 | H | -1.25790500 | 3.44619400  | 2.08126700  |
| O | -1.17813100 | 1.14479800  | -0.34442200 |   |             |             |             |
| C | -1.97370900 | 3.36444300  | -0.78169500 |   |             |             |             |
| H | -1.60436500 | 3.31603700  | -1.81121800 |   |             |             |             |
| H | -1.94561900 | 4.40911700  | -0.45194400 |   |             |             |             |
| H | -3.01471700 | 3.02566200  | -0.77172700 |   |             |             |             |
| C | -2.84329600 | -2.95655800 | -0.73185500 |   |             |             |             |
| H | -3.90570900 | -3.21211500 | -0.64858100 |   |             |             |             |
| H | -2.25636400 | -3.75586900 | -0.26856500 |   |             |             |             |
| H | -2.58103000 | -2.90489400 | -1.79346600 |   |             |             |             |

**Diethyl benzoylphosphonate**

SCF energy: -1070.494475

SCF energy in solution: -1070.2397732400

Free energy in solution: -1070.0384302400

|   |            |             |             |
|---|------------|-------------|-------------|
| O | 0.09728400 | -1.89400200 | 1.06326600  |
| C | 0.42516700 | -0.94408200 | 0.37022800  |
| C | 1.84127500 | -0.56651200 | 0.13251800  |
| C | 2.21494900 | 0.36642500  | -0.84859600 |
| C | 2.82910900 | -1.18406800 | 0.91993600  |
| C | 3.56145600 | 0.67986400  | -1.03031500 |
| H | 1.46083300 | 0.81718300  | -1.48557800 |
| C | 4.16916100 | -0.86083900 | 0.73998800  |
| H | 2.51972900 | -1.90829900 | 1.66663400  |
| C | 4.53657600 | 0.07302500  | -0.23584800 |
| H | 3.84965900 | 1.39496600  | -1.79550900 |

***N*-glutarimide anion**

SCF energy: -399.389134

SCF energy in solution: -399.33380146

Free energy in solution: -399.25762046

|   |             |             |             |
|---|-------------|-------------|-------------|
| C | -1.23495900 | 1.01638900  | 0.21147200  |
| C | 1.23495300  | 1.01637500  | 0.21158700  |
| C | 0.00002200  | 1.71794500  | -0.34911400 |
| H | -2.16788300 | 1.37504900  | -0.23789400 |
| H | 1.30932800  | 1.21497900  | 1.29349100  |
| H | 0.00007400  | 1.63497300  | -1.44643700 |
| N | -0.00000300 | -1.17474100 | -0.08615800 |
| C | 1.18615800  | -0.52277900 | 0.01130300  |
| C | -1.18616800 | -0.52276800 | 0.01130000  |
| O | 2.28488100  | -1.10108500 | -0.03289100 |
| O | -2.28488300 | -1.10108400 | -0.03282800 |
| H | 2.16792300  | 1.37503800  | -0.23767300 |
| H | 0.00001200  | 2.79448500  | -0.11527300 |
| H | -1.30946900 | 1.21504300  | 1.29336100  |

***N*-glutarimide**

SCF energy: -399.975013

SCF energy in solution: -399.86120383

Free energy in solution: -399.77041383

|                                         |             |             |             |   |             |             |             |
|-----------------------------------------|-------------|-------------|-------------|---|-------------|-------------|-------------|
| C                                       | -1.25954500 | 1.05779300  | 0.20835100  | C | 3.40648100  | -1.53436000 | 1.17191500  |
| C                                       | 1.25953800  | 1.05779600  | 0.20835000  | C | 4.78992200  | -1.74687500 | 1.06692400  |
| C                                       | -0.00000400 | 1.72287200  | -0.35915200 | C | 2.61617300  | -2.50722700 | 1.80261600  |
| H                                       | -2.17690500 | 1.43930300  | -0.24770200 | C | 5.36982700  | -2.90345700 | 1.58968600  |
| H                                       | 1.33691800  | 1.25352600  | 1.28795000  | H | 5.41530600  | -1.01273600 | 0.56629000  |
| H                                       | -0.00000400 | 1.63866200  | -1.45336200 | C | 3.19887700  | -3.66034800 | 2.33244700  |
| N                                       | 0.00000300  | -1.04902600 | -0.03890300 | H | 1.54041800  | -2.36384000 | 1.85801200  |
| C                                       | 1.26180900  | -0.45090300 | 0.02552000  | C | 4.57612500  | -3.86081500 | 2.22641100  |
| C                                       | -1.26180500 | -0.45091300 | 0.02556600  | H | 6.44186800  | -3.05830500 | 1.49740500  |
| O                                       | 2.26946300  | -1.12712900 | -0.04574200 | H | 2.57406900  | -4.40705500 | 2.81559900  |
| O                                       | -2.26945600 | -1.12713700 | -0.04576100 | H | 5.02913600  | -4.76248700 | 2.63033600  |
| H                                       | 2.17689700  | 1.43932000  | -0.24769000 | C | -2.54145600 | 1.30511500  | 1.65566700  |
| H                                       | -0.00000500 | 2.79240500  | -0.12459300 | C | -3.59179400 | 1.66238800  | 0.79272200  |
| H                                       | -1.33693300 | 1.25354500  | 1.28794700  | C | -2.86347700 | 0.71278400  | 2.88654200  |
| H                                       | 0.00000500  | -2.05931100 | -0.15001200 | C | -4.92142900 | 1.46093100  | 1.16289200  |
| <b>2a</b>                               |             |             |             | H | -3.36779100 | 2.11809900  | -0.16783200 |
| SCF energy: -2638.858177                |             |             |             | C | -4.19470000 | 0.51191600  | 3.25733300  |
| SCF energy in solution: -2638.01653768  |             |             |             | H | -2.07644600 | 0.39852600  | 3.56585000  |
| Free energy in solution: -2637.40306168 |             |             |             | C | -5.22894900 | 0.89009900  | 2.40067900  |
| P                                       | -0.78236200 | 1.51853100  | 1.11472900  | H | -5.71888200 | 1.75853900  | 0.48638100  |
| C                                       | 3.05091000  | 1.20444700  | 1.91601600  | H | -4.42038100 | 0.05650900  | 4.21804200  |
| H                                       | 2.72252600  | 0.73310800  | 2.85012500  | H | -6.26497800 | 0.73927200  | 2.69224000  |
| H                                       | 4.14266800  | 1.27117200  | 1.98850800  | C | -0.85503400 | 3.17095800  | 0.28101000  |
| C                                       | 0.05622800  | 1.93254900  | 2.75206100  | C | -1.45343600 | 4.28383500  | 0.89810400  |
| H                                       | -0.69347300 | 2.34652800  | 3.43671800  | C | -0.27005400 | 3.33102000  | -0.98317400 |
| H                                       | 0.36971200  | 0.96997600  | 3.17251200  | C | -1.45854900 | 5.52798900  | 0.26845400  |
| C                                       | 2.40468200  | 2.59851400  | 1.74021300  | H | -1.92668000 | 4.17648600  | 1.87078700  |
| H                                       | 2.05341900  | 2.72739200  | 0.70966800  | C | -0.27757900 | 4.57922700  | -1.61398600 |
| H                                       | 3.16979300  | 3.37101500  | 1.88843200  | H | 0.16916400  | 2.47135600  | -1.47782100 |
| C                                       | 1.24949000  | 2.90847800  | 2.70850100  | C | -0.86770900 | 5.67818100  | -0.99004400 |
| H                                       | 1.65312600  | 2.96315200  | 3.73003900  | H | -1.92417900 | 6.37967100  | 0.75789600  |
| H                                       | 0.87488400  | 3.91147900  | 2.47417300  | H | 0.17649200  | 4.68662800  | -2.59565200 |
| P                                       | 2.58368100  | 0.00580300  | 0.56365800  | H | -0.87280400 | 6.64806300  | -1.48090300 |
| C                                       | 3.62616600  | 0.50705800  | -0.87594400 | O | 0.26262500  | -2.09700000 | -1.04508900 |
| C                                       | 4.64554700  | 1.46948400  | -0.82681200 | C | -0.98139900 | -1.81658600 | -0.92694400 |
| C                                       | 3.34927400  | -0.12173300 | -2.10379800 | C | -1.82012800 | -2.42860900 | 0.14537700  |
| C                                       | 5.37792600  | 1.78974400  | -1.97372000 | C | -3.16258200 | -2.07490300 | 0.35140900  |
| H                                       | 4.87724700  | 1.98148900  | 0.10220200  | C | -1.24332300 | -3.40101000 | 0.98043700  |
| C                                       | 4.09085100  | 0.18868100  | -3.24264700 | C | -3.90714200 | -2.67648100 | 1.36447500  |
| H                                       | 2.54228700  | -0.84835600 | -2.16079900 | H | -3.62233300 | -1.31634900 | -0.27483700 |
| C                                       | 5.10628000  | 1.14723500  | -3.18166300 | C | -1.98922400 | -3.99677500 | 1.99459500  |
| H                                       | 6.16175000  | 2.54102500  | -1.91893900 | H | -0.21584500 | -3.69642100 | 0.79708300  |
| H                                       | 3.86791900  | -0.31096500 | -4.18173500 | C | -3.32570200 | -3.63850500 | 2.19352300  |
| H                                       | 5.67776100  | 1.39556300  | -4.07220300 | H | -4.94328800 | -2.38382100 | 1.51125400  |
|                                         |             |             |             | H | -1.53089200 | -4.75724200 | 2.62256100  |
|                                         |             |             |             | H | -3.90883200 | -4.10829500 | 2.98139000  |

|                                         |             |             |             |   |             |             |             |
|-----------------------------------------|-------------|-------------|-------------|---|-------------|-------------|-------------|
| C                                       | -2.22942500 | -0.06506700 | -4.16723900 | C | -2.92681700 | 1.00775600  | -1.55295700 |
| C                                       | -3.25425000 | -2.30560100 | -4.01341000 | C | -4.00052200 | 1.80182400  | -1.99121700 |
| C                                       | -3.55140900 | -0.82474300 | -4.22056800 | C | -2.13145000 | 0.35997200  | -2.51467500 |
| H                                       | -2.35443300 | 1.01838000  | -4.24788900 | C | -4.26399400 | 1.95663000  | -3.35284400 |
| H                                       | -2.71767400 | -2.71108800 | -4.88280700 | H | -4.64762800 | 2.29363400  | -1.27001300 |
| H                                       | -4.22470700 | -0.45929500 | -3.43464200 | C | -2.40139800 | 0.51073800  | -3.87792000 |
| N                                       | -1.72200000 | -1.49309500 | -2.17987600 | H | -1.29406300 | -0.25925100 | -2.19809700 |
| C                                       | -2.39097500 | -2.59243200 | -2.79118600 | C | -3.46335400 | 1.31200400  | -4.29948000 |
| C                                       | -1.45344000 | -0.31012200 | -2.88031900 | H | -5.09726500 | 2.57643400  | -3.67380400 |
| O                                       | -2.28188600 | -3.71700400 | -2.35119900 | H | -1.77558200 | 0.00158600  | -4.60586800 |
| O                                       | -0.63437200 | 0.50697200  | -2.49057800 | H | -3.66970900 | 1.43287800  | -5.35969000 |
| H                                       | -4.15788800 | -2.91250700 | -3.89943100 | C | 2.15824500  | 1.86935300  | -1.44174800 |
| H                                       | -4.05711500 | -0.65989700 | -5.17822700 | C | 3.55373100  | 1.85300000  | -1.30288200 |
| H                                       | -1.58444100 | -0.36989400 | -5.00444200 | C | 1.60970200  | 1.88485300  | -2.73583200 |
| Pd                                      | 0.28037500  | -0.23591100 | 0.00090400  | C | 4.37895900  | 1.88139000  | -2.42953900 |
|                                         |             |             |             | H | 4.00278500  | 1.81723000  | -0.31634300 |
|                                         |             |             |             | C | 2.43554200  | 1.91372100  | -3.85817200 |
| <b>TS1a</b>                             |             |             |             | H | 0.53247800  | 1.86015100  | -2.87347500 |
| SCF energy: -2638.833306                |             |             |             | C | 3.82436300  | 1.91633300  | -3.70887600 |
| SCF energy in solution: -2637.99245417  |             |             |             | H | 5.45834400  | 1.87165900  | -2.30204400 |
| Free energy in solution: -2637.38105017 |             |             |             | H | 1.99303900  | 1.92722900  | -4.85077200 |
| P                                       | 1.01280200  | 1.78765500  | 0.00264100  | H | 4.46816900  | 1.93735500  | -4.58418400 |
| C                                       | -2.91427900 | 2.38163500  | 1.08158600  | C | 1.99539400  | 2.46546300  | 1.41402300  |
| H                                       | -3.41635100 | 3.06015400  | 0.38170100  | C | 2.72354600  | 3.66451400  | 1.31592100  |
| H                                       | -3.64340100 | 2.14423200  | 1.86315700  | C | 1.96262700  | 1.79614100  | 2.64494000  |
| C                                       | -0.12384800 | 3.23730900  | -0.39658400 | C | 3.40243600  | 4.17494300  | 2.42226800  |
| H                                       | 0.46939000  | 3.98884200  | -0.93056600 | H | 2.76989400  | 4.19754900  | 0.37003500  |
| H                                       | -0.86105500 | 2.85930000  | -1.11344400 | C | 2.64009900  | 2.30891300  | 3.75436300  |
| C                                       | -1.69785200 | 3.07511800  | 1.72387600  | H | 1.40122400  | 0.86907600  | 2.72293800  |
| H                                       | -1.08019600 | 2.32701400  | 2.23619000  | C | 3.36127100  | 3.49763600  | 3.64458100  |
| H                                       | -2.07222900 | 3.74723300  | 2.50823500  | H | 3.96364100  | 5.10128400  | 2.33082100  |
| C                                       | -0.82560900 | 3.92764600  | 0.78823800  | H | 2.60654100  | 1.77560500  | 4.70072300  |
| H                                       | -1.44970500 | 4.73001400  | 0.36777200  | H | 3.89158100  | 3.89644500  | 4.50537600  |
| H                                       | -0.06548800 | 4.42625700  | 1.40082600  | O | 1.13484200  | -1.37273000 | -1.61272200 |
| P                                       | -2.51927300 | 0.74310400  | 0.23162200  | C | 1.33174100  | -1.45568900 | -0.40557000 |
| C                                       | -3.90317700 | -0.32629600 | 0.83200700  | C | 2.69389700  | -1.51123300 | 0.23207100  |
| C                                       | -3.96335200 | -0.60706500 | 2.20871100  | C | 2.86237000  | -1.60357400 | 1.61883000  |
| C                                       | -4.84934300 | -0.92092800 | -0.01518900 | C | 3.82127300  | -1.45980700 | -0.59670700 |
| C                                       | -4.96204600 | -1.42956800 | 2.72652300  | C | 4.14040400  | -1.64735400 | 2.17228500  |
| H                                       | -3.21373900 | -0.19343100 | 2.87897900  | H | 1.98380800  | -1.64554900 | 2.25704500  |
| C                                       | -5.84350900 | -1.75457700 | 0.50428600  | C | 5.10083600  | -1.49859100 | -0.04082300 |
| H                                       | -4.81867500 | -0.73111700 | -1.08304100 | H | 3.67608600  | -1.40975400 | -1.66988600 |
| C                                       | -5.90797700 | -2.00643500 | 1.87472400  | C | 5.26516900  | -1.59189700 | 1.34258400  |
| H                                       | -4.99447700 | -1.62991800 | 3.79438600  | H | 4.26178700  | -1.72428500 | 3.25001500  |
| H                                       | -6.57152500 | -2.20241900 | -0.16744100 | H | 5.97134900  | -1.46645000 | -0.69151900 |
| H                                       | -6.68427800 | -2.65198900 | 2.27688800  | H | 6.26258300  | -1.62628900 | 1.77371400  |

|                                           |             |             |             |   |             |             |             |
|-------------------------------------------|-------------|-------------|-------------|---|-------------|-------------|-------------|
| C                                         | -1.10788300 | -4.32656200 | 1.61257600  | C | -2.25151900 | -2.26888300 | -0.66384900 |
| C                                         | 0.39200500  | -5.58626000 | 0.07083700  | C | -2.53545900 | -3.43893100 | -1.38849100 |
| C                                         | -0.19340800 | -5.54559400 | 1.48354500  | C | -2.54061900 | -2.23548700 | 0.71237500  |
| H                                         | -1.41242100 | -4.13213300 | 2.64548300  | C | -3.08709000 | -4.55177000 | -0.75000700 |
| H                                         | -0.41239200 | -5.74107900 | -0.66373200 | H | -2.33441300 | -3.49769300 | -2.45346600 |
| H                                         | 0.62109900  | -5.47760700 | 2.21673800  | C | -3.11000200 | -3.34463400 | 1.34145200  |
| N                                         | 0.57187800  | -3.09826200 | 0.23355200  | H | -2.34542300 | -1.33958000 | 1.29557700  |
| C                                         | 1.10666700  | -4.28138300 | -0.28671100 | C | -3.37738400 | -4.50690000 | 0.61582500  |
| C                                         | -0.46739300 | -3.05688100 | 1.07300100  | H | -3.29656400 | -5.45065400 | -1.32437100 |
| O                                         | 2.08594800  | -4.27313400 | -1.01035900 | H | -3.34325100 | -3.27799700 | 2.40012800  |
| O                                         | -0.96018100 | -1.95714500 | 1.43641500  | H | -3.81423200 | -5.37255800 | 1.10722300  |
| H                                         | 1.11423800  | -6.39537000 | -0.06471200 | C | 2.07901100  | -1.95007900 | 1.50772100  |
| H                                         | -0.74643800 | -6.46507400 | 1.70619400  | C | 3.27927500  | -1.74520600 | 2.20195400  |
| H                                         | -2.03386400 | -4.47942500 | 1.03963700  | C | 1.03834200  | -2.65296200 | 2.13720200  |
| Pd                                        | -0.17955600 | -0.20330900 | 0.39425500  | C | 3.44604000  | -2.25947600 | 3.48868400  |
|                                           |             |             |             | H | 4.08441700  | -1.17989500 | 1.74503900  |
| <b>3a</b>                                 |             |             |             | C | 1.20946900  | -3.16529100 | 3.42246300  |
| SCF energy: -2638.857569                  |             |             |             | H | 0.08246600  | -2.78815200 | 1.63957400  |
| SCF energy in solution: -2638.0112782900  |             |             |             | C | 2.41513000  | -2.97335900 | 4.10014100  |
| Free energy in solution: -2637.3987242900 |             |             |             | H | 4.38200400  | -2.09242300 | 4.01503800  |
| P                                         | 1.77688000  | -1.24558500 | -0.16525900 | H | 0.39389700  | -3.70402300 | 3.89664600  |
| C                                         | -0.93438200 | -1.17770200 | -3.12052200 | H | 2.54560300  | -3.36887000 | 5.10384700  |
| H                                         | -1.48631000 | -2.03702400 | -3.51816800 | C | 3.44809300  | -0.94895100 | -0.88623000 |
| H                                         | -1.23427600 | -0.32257700 | -3.73695900 | C | 4.41756700  | -1.96847400 | -0.90244400 |
| C                                         | 1.21486200  | -2.74837500 | -1.12429700 | C | 3.74972100  | 0.27821500  | -1.49112400 |
| H                                         | 1.85854500  | -3.58702200 | -0.83357900 | C | 5.65759000  | -1.75810200 | -1.50374200 |
| H                                         | 0.21264200  | -2.98979900 | -0.76078600 | H | 4.21054000  | -2.92577900 | -0.43208200 |
| C                                         | 0.58282500  | -1.37164900 | -3.28970400 | C | 4.99302600  | 0.48797600  | -2.09415300 |
| H                                         | 1.09574900  | -0.47104300 | -2.93042900 | H | 3.01357700  | 1.07453300  | -1.48525400 |
| H                                         | 0.78231500  | -1.41829800 | -4.36921800 | C | 5.94776100  | -0.52810600 | -2.10168700 |
| C                                         | 1.22872300  | -2.61770000 | -2.66071500 | H | 6.39791300  | -2.55366400 | -1.50464500 |
| H                                         | 0.75147800  | -3.51895300 | -3.07099800 | H | 5.21137400  | 1.44867700  | -2.55225700 |
| H                                         | 2.27221000  | -2.64763000 | -2.99705500 | H | 6.91538800  | -0.36521900 | -2.56868700 |
| P                                         | -1.54448500 | -0.72992400 | -1.39934300 | O | 1.80421400  | 1.23013700  | 2.17889000  |
| C                                         | -3.03658300 | 0.27394700  | -1.82150600 | C | 1.52374200  | 1.56908400  | 1.04877600  |
| C                                         | -2.83917400 | 1.57409100  | -2.31763200 | C | 2.04625800  | 2.87283300  | 0.49062100  |
| C                                         | -4.34722300 | -0.20177300 | -1.67467200 | C | 1.69152400  | 3.34168400  | -0.78107600 |
| C                                         | -3.92688900 | 2.37005800  | -2.67686500 | C | 2.93389500  | 3.62436100  | 1.27720600  |
| H                                         | -1.83336500 | 1.97554300  | -2.39957400 | C | 2.21883100  | 4.54035500  | -1.26244200 |
| C                                         | -5.43496800 | 0.60020100  | -2.02817200 | H | 0.98758400  | 2.76959800  | -1.37781800 |
| H                                         | -4.52385900 | -1.19721200 | -1.28120600 | C | 3.46166300  | 4.82007700  | 0.79572000  |
| C                                         | -5.22902000 | 1.88482400  | -2.53271700 | H | 3.19413600  | 3.25057800  | 2.26252700  |
| H                                         | -3.75623900 | 3.37393800  | -3.05684900 | C | 3.10568000  | 5.28004500  | -0.47610600 |
| H                                         | -6.44468400 | 0.21625800  | -1.90826100 | H | 1.93323400  | 4.90129900  | -2.24717400 |
| H                                         | -6.07707100 | 2.50694800  | -2.80649600 | H | 4.15019500  | 5.39529700  | 1.40950900  |
|                                           |             |             |             | H | 3.51643600  | 6.21393500  | -0.85154400 |

|                                           |             |             |             |   |             |             |             |
|-------------------------------------------|-------------|-------------|-------------|---|-------------|-------------|-------------|
| C                                         | -2.72255400 | 3.34753500  | 1.38952500  | C | -2.18252700 | -2.50740800 | 0.01386900  |
| C                                         | -3.90932500 | 2.02612500  | 3.13682100  | C | -2.75119300 | -3.66282100 | -0.54808700 |
| C                                         | -3.20854000 | 3.35233900  | 2.84163500  | C | -1.85796000 | -2.50641200 | 1.38270000  |
| H                                         | -2.10130900 | 4.21623900  | 1.15333600  | C | -2.96794800 | -4.79968100 | 0.23171500  |
| H                                         | -4.86656800 | 1.98160400  | 2.59540900  | H | -3.04080300 | -3.68324900 | -1.59474900 |
| H                                         | -2.34683900 | 3.47331300  | 3.51157300  | C | -2.08810000 | -3.64372900 | 2.16206600  |
| N                                         | -2.11809000 | 0.93689600  | 1.71949700  | H | -1.45138700 | -1.60735100 | 1.84059300  |
| C                                         | -3.09032300 | 0.80496900  | 2.69504700  | C | -2.63389800 | -4.79319900 | 1.58844700  |
| C                                         | -1.91982000 | 2.08718900  | 1.10029300  | H | -3.40458600 | -5.68701100 | -0.21937200 |
| O                                         | -3.33200800 | -0.29057300 | 3.19733000  | H | -1.83690400 | -3.62427500 | 3.21898300  |
| O                                         | -1.02298200 | 2.19920700  | 0.19022100  | H | -2.80599900 | -5.67848900 | 2.19510800  |
| H                                         | -4.14471700 | 1.89967100  | 4.19772700  | C | 2.46827400  | -2.06761300 | 0.96747100  |
| H                                         | -3.87693900 | 4.20218600  | 3.02457100  | C | 3.60561600  | -1.52456200 | 1.58449100  |
| H                                         | -3.57949200 | 3.36733700  | 0.69983300  | C | 1.90122700  | -3.23448800 | 1.50326100  |
| Pd                                        | 0.21808300  | 0.46675500  | -0.07003300 | C | 4.17479800  | -2.14648800 | 2.69495700  |
|                                           |             |             |             | H | 4.05076000  | -0.61323700 | 1.19854900  |
| <b>4a</b>                                 |             |             |             | C | 2.47076800  | -3.85277000 | 2.61756100  |
| SCF energy: -2638.872920                  |             |             |             | H | 1.00666000  | -3.66436700 | 1.06445000  |
| SCF energy in solution: -2638.0332922700  |             |             |             | C | 3.61067500  | -3.31307400 | 3.21419000  |
| Free energy in solution: -2637.4188142700 |             |             |             | H | 5.05645800  | -1.71271900 | 3.15889200  |
| P                                         | 1.67997300  | -1.21535600 | -0.46463500 | H | 2.01963400  | -4.75689700 | 3.01772300  |
| C                                         | -1.63173300 | -1.45006600 | -2.73032600 | H | 4.05361400  | -3.79510600 | 4.08155400  |
| H                                         | -1.95567300 | -2.48534500 | -2.88733100 | C | 3.10309000  | -0.60338200 | -1.46578800 |
| H                                         | -2.32606200 | -0.82360200 | -3.29801900 | C | 4.24029700  | -1.40053100 | -1.68617200 |
| C                                         | 1.09671300  | -2.66331100 | -1.50007500 | C | 3.02532500  | 0.65245300  | -2.08264300 |
| H                                         | 1.86901500  | -3.43990900 | -1.44629300 | C | 5.27596000  | -0.94410500 | -2.50036100 |
| H                                         | 0.20621200  | -3.07000000 | -1.01001500 | H | 4.32373600  | -2.37354500 | -1.21002700 |
| C                                         | -0.21024100 | -1.24023100 | -3.28417100 | C | 4.06356700  | 1.10788300  | -2.89948300 |
| H                                         | 0.17027100  | -0.27169600 | -2.93828500 | H | 2.15381400  | 1.27654200  | -1.91503200 |
| H                                         | -0.28526900 | -1.16379600 | -4.37718900 | C | 5.18935100  | 0.31200400  | -3.10845400 |
| C                                         | 0.80647700  | -2.35101900 | -2.97914600 | H | 6.15208800  | -1.56747600 | -2.65845200 |
| H                                         | 0.45981900  | -3.28482600 | -3.44480600 | H | 3.99126500  | 2.08804800  | -3.36252400 |
| H                                         | 1.74990300  | -2.09606800 | -3.47631300 | H | 5.99965000  | 0.66740800  | -3.73946600 |
| P                                         | -1.87006400 | -0.95030200 | -0.93143600 | O | 1.58457400  | 0.73767900  | 2.39172600  |
| C                                         | -3.54335800 | -0.16164900 | -0.98064500 | C | 1.35149300  | 1.27614500  | 1.32811600  |
| C                                         | -3.78385400 | 0.88514100  | -1.88769200 | C | 1.98923300  | 2.60488000  | 1.00408700  |
| C                                         | -4.57036900 | -0.54302000 | -0.10403700 | C | 1.67184700  | 3.33679100  | -0.14633800 |
| C                                         | -5.03039100 | 1.51043700  | -1.93571300 | C | 2.95082200  | 3.10789300  | 1.89859500  |
| H                                         | -2.98902800 | 1.24222600  | -2.53538300 | C | 2.30514000  | 4.55618600  | -0.39739900 |
| C                                         | -5.81418900 | 0.09156000  | -0.14872500 | H | 0.90688200  | 2.96896000  | -0.82343400 |
| H                                         | -4.40530400 | -1.33796400 | 0.61516700  | C | 3.58690900  | 4.31878500  | 1.64121300  |
| C                                         | -6.05134800 | 1.11392200  | -1.06826800 | H | 3.17814000  | 2.53180300  | 2.79010400  |
| H                                         | -5.19851500 | 2.31421900  | -2.64771400 | C | 3.26466600  | 5.04657100  | 0.49025000  |
| H                                         | -6.59893000 | -0.22133900 | 0.53507000  | H | 2.04270700  | 5.12456100  | -1.28609300 |
| H                                         | -7.02157400 | 1.60214400  | -1.10613600 | H | 4.33112200  | 4.69981800  | 2.33623300  |
|                                           |             |             |             | H | 3.75879100  | 5.99425500  | 0.29018100  |







|                                           |             |             |             |   |             |             |             |
|-------------------------------------------|-------------|-------------|-------------|---|-------------|-------------|-------------|
| C                                         | 2.09538200  | -3.03128900 | -3.57009700 | H | -2.87160800 | 2.19197100  | -1.41137300 |
| C                                         | 2.92602300  | -4.08825900 | -1.48557700 | C | -1.11135500 | 0.81722700  | -3.34975800 |
| C                                         | 2.41297000  | -4.36607000 | -2.89731700 | H | -0.75227700 | -0.09827000 | -2.86814500 |
| H                                         | 1.62049400  | -3.15115700 | -4.54814100 | H | -0.91020100 | 0.67554400  | -4.42029600 |
| H                                         | 3.92959700  | -3.63731800 | -1.53669600 | C | -2.63139600 | 0.96852600  | -3.20065400 |
| H                                         | 1.50034600  | -4.97622700 | -2.84392900 | H | -2.97340700 | 1.80552800  | -3.82687000 |
| N                                         | 1.21263800  | -2.23593600 | -1.34573000 | H | -3.10308700 | 0.06856500  | -3.61234300 |
| C                                         | 2.03001100  | -3.11299500 | -0.70542200 | P | 0.05513100  | 2.14858600  | -1.03128800 |
| C                                         | 1.17316500  | -2.15996500 | -2.70641400 | C | 1.80486000  | 2.73594300  | -1.03729400 |
| O                                         | 2.09445600  | -3.15015400 | 0.53840400  | C | 2.80439900  | 1.77464400  | -1.25757500 |
| O                                         | 0.41245000  | -1.36762900 | -3.28842100 | C | 2.16450600  | 4.08512500  | -0.90665500 |
| H                                         | 3.02463000  | -4.99762400 | -0.88451100 | C | 4.14087000  | 2.16323400  | -1.37043600 |
| H                                         | 3.14373100  | -4.94163200 | -3.47916100 | H | 2.55228600  | 0.71709800  | -1.33362800 |
| H                                         | 3.02641300  | -2.46698400 | -3.73505100 | C | 3.50239100  | 4.46853100  | -1.02088300 |
| Pd                                        | -0.25428400 | 0.19435700  | 0.14162000  | H | 1.40656400  | 4.84012900  | -0.72400500 |
| P                                         | 2.38649600  | -0.68619400 | 2.25038700  | C | 4.49086600  | 3.51130200  | -1.26088200 |
| H                                         | 1.71950600  | -1.88462600 | 2.49680500  | H | 4.89857100  | 1.39946600  | -1.51816200 |
| C                                         | 1.62959900  | 0.47248900  | 4.52618900  | H | 3.76956700  | 5.51807800  | -0.92573400 |
| H                                         | 1.12651200  | 1.27072600  | 3.97344000  | H | 5.53071200  | 3.81500100  | -1.35403700 |
| H                                         | 0.89235500  | -0.31537900 | 4.71798300  | C | -0.88481200 | 3.61847800  | -0.42004900 |
| C                                         | 4.54535800  | -2.21522500 | 2.22471100  | C | -1.35433100 | 4.66453000  | -1.23012900 |
| H                                         | 4.66408900  | -2.13056500 | 3.31115900  | C | -1.11865100 | 3.68483100  | 0.96585300  |
| H                                         | 3.93299200  | -3.08613900 | 1.97605100  | C | -2.04849400 | 5.74150900  | -0.67323800 |
| O                                         | 1.66565300  | 0.26213200  | 1.33358300  | H | -1.17866900 | 4.65321100  | -2.30151400 |
| O                                         | 3.85332700  | -1.03221500 | 1.73635800  | C | -1.80251600 | 4.76679300  | 1.52258600  |
| O                                         | 2.70079400  | -0.06249700 | 3.70632000  | H | -0.76419000 | 2.88277400  | 1.60902400  |
| C                                         | 2.24742400  | 0.98012200  | 5.81573300  | C | -2.27386900 | 5.79532300  | 0.70357400  |
| H                                         | 2.74489400  | 0.16855700  | 6.35675800  | H | -2.40740400 | 6.54043500  | -1.31682300 |
| H                                         | 1.46710000  | 1.39933700  | 6.46077900  | H | -1.97115900 | 4.79999500  | 2.59546500  |
| H                                         | 2.98613200  | 1.76137400  | 5.60960000  | H | -2.81222300 | 6.63479400  | 1.13534400  |
| C                                         | 5.89426800  | -2.27133500 | 1.53361800  | C | -4.02628200 | 0.25920200  | 0.79613000  |
| H                                         | 6.45253000  | -3.14765800 | 1.88205100  | C | -4.56852300 | -0.79198900 | 1.55163100  |
| H                                         | 6.48269100  | -1.37367300 | 1.74819800  | C | -4.42439800 | 1.57405300  | 1.08774700  |
| H                                         | 5.76418000  | -2.35264100 | 0.44988100  | C | -5.50370800 | -0.53684400 | 2.55405900  |
|                                           |             |             |             | H | -4.26507100 | -1.81533300 | 1.35609600  |
|                                           |             |             |             | C | -5.35661500 | 1.82688900  | 2.09507100  |
| <b>5a</b>                                 |             |             |             | H | -4.00559600 | 2.41213700  | 0.54006400  |
| SCF energy: -3364.973154                  |             |             |             | C | -5.90186600 | 0.77256100  | 2.82859100  |
| SCF energy in solution: -3364.0329502400  |             |             |             | H | -5.91554600 | -1.36431900 | 3.12530300  |
| Free energy in solution: -3363.2788272400 |             |             |             | H | -5.65482000 | 2.85078200  | 2.30416500  |
| P                                         | -2.74550000 | -0.05498500 | -0.49242600 | H | -6.62862600 | 0.96999600  | 3.61192500  |
| C                                         | -0.24686500 | 2.00056700  | -2.88350800 | C | -3.24610900 | -1.62643400 | -1.30760800 |
| H                                         | -0.61831600 | 2.94944000  | -3.28960000 | C | -4.60229100 | -1.94931000 | -1.49646000 |
| H                                         | 0.75881300  | 1.86690700  | -3.29454700 | C | -2.25913300 | -2.46301700 | -1.84916000 |
| C                                         | -3.19067100 | 1.21583800  | -1.78876900 | C | -4.96066800 | -3.10109400 | -2.19537100 |
| H                                         | -4.28614200 | 1.23901500  | -1.83771500 | H | -5.37927000 | -1.30848900 | -1.09017600 |

|    |             |             |             |                                           |             |             |             |
|----|-------------|-------------|-------------|-------------------------------------------|-------------|-------------|-------------|
| C  | -2.62675300 | -3.61193000 | -2.55524000 | H                                         | 4.15284800  | -2.82310100 | 4.43406600  |
| H  | -1.20574800 | -2.21944300 | -1.75250600 | H                                         | 2.66530800  | -3.65205700 | 4.94513300  |
| C  | -3.97223800 | -3.93668100 | -2.72394100 | H                                         | 3.02854200  | -2.02144800 | 5.55341300  |
| H  | -6.01152100 | -3.34476900 | -2.32829600 | C                                         | 5.49121300  | 2.59441800  | 2.38648100  |
| H  | -1.84909500 | -4.24489600 | -2.97263400 | H                                         | 6.58297700  | 2.54258600  | 2.46988800  |
| H  | -4.25415600 | -4.83391000 | -3.26889300 | H                                         | 5.09311800  | 3.03503700  | 3.30633000  |
| O  | -1.68968100 | -0.96700900 | 2.71325500  | H                                         | 5.23400500  | 3.24616400  | 1.54672200  |
| C  | -1.08695900 | -1.29173800 | 1.71338900  |                                           |             |             |             |
| C  | -0.55097200 | -2.68279500 | 1.53711900  |                                           |             |             |             |
| C  | 0.31738700  | -3.01801500 | 0.49051500  | <b>6a</b>                                 |             |             |             |
| C  | -0.92141700 | -3.65979400 | 2.48007700  | SCF energy: -2965.445163                  |             |             |             |
| C  | 0.82176700  | -4.31761600 | 0.39842100  | SCF energy in solution: -2964.6234604600  |             |             |             |
| H  | 0.61316600  | -2.27940400 | -0.25030500 | Free energy in solution: -2963.9726314600 |             |             |             |
| C  | -0.42567700 | -4.95559200 | 2.37507500  | P                                         | 2.40584900  | -0.98704300 | 0.03839600  |
| H  | -1.59095200 | -3.37773600 | 3.28684500  | C                                         | -0.23665300 | -3.26460200 | -1.93746600 |
| C  | 0.45158000  | -5.28514100 | 1.33393200  | H                                         | -0.05083100 | -4.15471400 | -1.32554000 |
| H  | 1.50521700  | -4.56495300 | -0.40852300 | H                                         | -0.97776400 | -3.55023400 | -2.69024200 |
| H  | -0.71705300 | -5.70971600 | 3.10182700  | C                                         | 2.42361900  | -2.80983100 | -0.36898000 |
| H  | 0.84249800  | -6.29659500 | 1.25488600  | H                                         | 3.35544200  | -3.20455800 | 0.05270100  |
| C  | 2.76579700  | -2.69997100 | -3.74988800 | H                                         | 1.60847500  | -3.27419700 | 0.19712900  |
| C  | 4.93094900  | -2.34663600 | -2.58386500 | C                                         | 1.07029300  | -2.80002000 | -2.61622100 |
| C  | 4.08375900  | -3.36357500 | -3.34818000 | H                                         | 1.05320500  | -1.71505400 | -2.77900500 |
| H  | 2.05909800  | -3.40183000 | -4.20288000 | H                                         | 1.12938800  | -3.24978200 | -3.61430700 |
| H  | 5.28871900  | -1.56684000 | -3.27366200 | C                                         | 2.34667400  | -3.19468800 | -1.85618900 |
| H  | 3.87688100  | -4.22975900 | -2.70376600 | H                                         | 2.45326100  | -4.28700500 | -1.90214000 |
| N  | 2.78525200  | -1.57000600 | -1.49989000 | H                                         | 3.21559700  | -2.78311900 | -2.38223500 |
| C  | 4.14335600  | -1.64425000 | -1.46827900 | P                                         | -1.03568700 | -1.97029500 | -0.83284100 |
| C  | 2.06844900  | -2.03766400 | -2.55238700 | C                                         | -2.38046900 | -1.32601900 | -1.91936000 |
| O  | 4.79386300  | -1.12154700 | -0.54241500 | C                                         | -2.01630100 | -0.62075400 | -3.08086000 |
| O  | 0.82588000  | -1.92956600 | -2.59278000 | C                                         | -3.74077200 | -1.50672100 | -1.63625400 |
| H  | 5.82234600  | -2.79175600 | -2.13093800 | C                                         | -2.99058100 | -0.12897900 | -3.94922100 |
| H  | 4.61949100  | -3.74522700 | -4.22630600 | H                                         | -0.96666100 | -0.46148600 | -3.31716600 |
| H  | 2.95864500  | -1.91761800 | -4.50013700 | C                                         | -4.71457000 | -1.01064500 | -2.50706900 |
| Pd | -0.60473600 | 0.16086900  | 0.37089300  | H                                         | -4.04523900 | -2.03864000 | -0.74125000 |
| P  | 2.59487100  | 0.01072500  | 1.85362600  | C                                         | -4.34465700 | -0.32465100 | -3.66436400 |
| H  | 3.14008300  | -0.71864800 | 0.78779900  | H                                         | -2.69300300 | 0.40190000  | -4.84943700 |
| C  | 2.34123500  | -2.08860000 | 3.50501800  | H                                         | -5.76530800 | -1.17096100 | -2.28113500 |
| H  | 1.28251400  | -1.94858500 | 3.73958600  | H                                         | -5.10439000 | 0.05287900  | -4.34284300 |
| H  | 2.41821000  | -2.73402200 | 2.62251100  | C                                         | -1.87088100 | -2.94287500 | 0.47956000  |
| C  | 4.92981200  | 1.20203900  | 2.17270300  | C                                         | -2.44733000 | -4.20166200 | 0.23473700  |
| H  | 5.16010500  | 0.54811400  | 3.01999200  | C                                         | -1.92058000 | -2.41112800 | 1.77866300  |
| H  | 5.30692900  | 0.74062900  | 1.25458600  | C                                         | -3.05345500 | -4.91344500 | 1.27004200  |
| O  | 1.14281200  | 0.38516600  | 1.68585100  | H                                         | -2.43153400 | -4.62807500 | -0.76439900 |
| O  | 3.48111600  | 1.32265000  | 2.06495200  | C                                         | -2.53094800 | -3.12519300 | 2.81211100  |
| O  | 2.92056000  | -0.79320900 | 3.21337200  | H                                         | -1.48732100 | -1.43442300 | 1.97538300  |
| C  | 3.09605400  | -2.67977300 | 4.68130800  | C                                         | -3.09472600 | -4.37692300 | 2.55989600  |

|    |             |             |             |                                           |             |             |             |
|----|-------------|-------------|-------------|-------------------------------------------|-------------|-------------|-------------|
| H  | -3.49409000 | -5.88595600 | 1.06969200  | H                                         | -5.18401300 | 3.18310600  | 0.05906600  |
| H  | -2.56232500 | -2.70394900 | 3.81302800  | O                                         | -1.60923600 | 0.92227700  | 0.51205400  |
| H  | -3.56570500 | -4.93434500 | 3.36455600  | O                                         | -4.09568700 | 1.45472200  | 0.49948200  |
| C  | 3.01623500  | -0.97553100 | 1.77049100  | O                                         | -2.66795900 | 2.73746300  | 2.09299100  |
| C  | 3.98207700  | -0.05672800 | 2.20597700  | C                                         | -1.93774800 | 4.03102000  | 3.98490500  |
| C  | 2.45635300  | -1.86918900 | 2.70003700  | H                                         | -2.70571400 | 4.78957100  | 3.80520400  |
| C  | 4.39776900  | -0.04976700 | 3.53801200  | H                                         | -1.07803300 | 4.51451000  | 4.46089500  |
| H  | 4.41588000  | 0.65262400  | 1.50909500  | H                                         | -2.33793600 | 3.28239300  | 4.67526500  |
| C  | 2.87402300  | -1.85765900 | 4.03034400  | C                                         | -6.49283400 | 1.47400000  | 0.32854900  |
| H  | 1.69039100  | -2.57736700 | 2.39619400  | H                                         | -7.39579900 | 2.07968100  | 0.45978700  |
| C  | 3.84795500  | -0.94965000 | 4.45176300  | H                                         | -6.57201000 | 0.59085200  | 0.96946800  |
| H  | 5.15127200  | 0.66327800  | 3.85991800  | H                                         | -6.43889600 | 1.14824100  | -0.71438400 |
| H  | 2.43916700  | -2.55971000 | 4.73607500  |                                           |             |             |             |
| H  | 4.17434300  | -0.94282400 | 5.48770800  |                                           |             |             |             |
| C  | 3.76470900  | -0.32505700 | -0.99948200 | <b>TS4a</b>                               |             |             |             |
| C  | 5.07911600  | -0.80137000 | -0.83818900 | SCF energy: -3364.961896                  |             |             |             |
| C  | 3.49564100  | 0.59946600  | -2.01822600 | SCF energy in solution: -3364.0153595200  |             |             |             |
| C  | 6.09854800  | -0.35036100 | -1.67485600 | Free energy in solution: -3363.2660685200 |             |             |             |
| H  | 5.31197000  | -1.51472600 | -0.05276700 | P                                         | -2.75404000 | -0.16319200 | -0.43487900 |
| C  | 4.51973100  | 1.04829900  | -2.85592700 | C                                         | -0.48999200 | 1.92995800  | -3.03750800 |
| H  | 2.48701000  | 0.97425000  | -2.15497500 | H                                         | -1.00180200 | 2.82479200  | -3.41097100 |
| C  | 5.82060200  | 0.57558200  | -2.68491100 | H                                         | 0.48325900  | 1.90296000  | -3.53725900 |
| H  | 7.11022600  | -0.72125100 | -1.53805600 | C                                         | -3.30297200 | 1.01226800  | -1.78318300 |
| H  | 4.29809200  | 1.76875500  | -3.63796900 | H                                         | -4.39939700 | 0.99207000  | -1.79218000 |
| H  | 6.61757500  | 0.92571300  | -3.33453600 | H                                         | -3.00989100 | 2.02091200  | -1.47342300 |
| O  | 1.49787900  | 1.87497600  | 1.73336200  | C                                         | -1.26922200 | 0.65797700  | -3.41584600 |
| C  | 1.14118000  | 1.72888300  | 0.58380100  | H                                         | -0.82701300 | -0.20608800 | -2.90797000 |
| C  | 1.08479900  | 2.89507000  | -0.36718000 | H                                         | -1.10523300 | 0.47871800  | -4.48683800 |
| C  | 0.50138300  | 2.79600700  | -1.63950400 | C                                         | -2.78892400 | 0.70783300  | -3.20108000 |
| C  | 1.62654800  | 4.12402800  | 0.04908600  | H                                         | -3.21451900 | 1.47655700  | -3.86257700 |
| C  | 0.45333600  | 3.90756500  | -2.48123700 | H                                         | -3.21280900 | -0.24705500 | -3.53307400 |
| H  | 0.08043000  | 1.84682000  | -1.96325400 | P                                         | -0.07040300 | 2.11759800  | -1.20960700 |
| C  | 1.58635900  | 5.22997700  | -0.79653000 | C                                         | 1.67926700  | 2.69243700  | -1.32038500 |
| H  | 2.07744500  | 4.18814100  | 1.03438500  | C                                         | 2.65910600  | 1.72300900  | -1.58896600 |
| C  | 0.99774200  | 5.12427300  | -2.06125600 | C                                         | 2.06096000  | 4.03423500  | -1.18952000 |
| H  | -0.00355600 | 3.82570300  | -3.46353700 | C                                         | 3.99506500  | 2.09634500  | -1.74013700 |
| H  | 2.01376600  | 6.17496700  | -0.47327700 | H                                         | 2.38299100  | 0.67276300  | -1.65856400 |
| H  | 0.96649700  | 5.98822500  | -2.71916900 | C                                         | 3.39922100  | 4.40326000  | -1.34397300 |
| Pd | 0.31117800  | -0.03342100 | -0.02906000 | H                                         | 1.31942100  | 4.79523500  | -0.96879500 |
| P  | -2.62131000 | 2.01361500  | 0.67332900  | C                                         | 4.36784400  | 3.43755100  | -1.62308900 |
| H  | -2.45553800 | 3.03922600  | -0.27181600 | H                                         | 4.74519300  | 1.33238300  | -1.92477400 |
| C  | -1.49547200 | 3.38330700  | 2.68878400  | H                                         | 3.68246600  | 5.44821300  | -1.24582900 |
| H  | -0.72873700 | 2.62246600  | 2.85054900  | H                                         | 5.40881000  | 3.72769300  | -1.74083400 |
| H  | -1.11088500 | 4.12590700  | 1.97966500  | C                                         | -0.97382700 | 3.60066800  | -0.57934200 |
| C  | -5.27459200 | 2.29566700  | 0.69733700  | C                                         | -1.50533800 | 4.62051200  | -1.38432200 |
| H  | -5.29383000 | 2.61271900  | 1.74316800  | C                                         | -1.11463700 | 3.70154200  | 0.81751200  |

|   |             |             |             |                                           |             |             |             |
|---|-------------|-------------|-------------|-------------------------------------------|-------------|-------------|-------------|
| C | -2.17361400 | 5.70531200  | -0.81109300 | H                                         | 2.33391400  | -3.86457300 | -4.21066200 |
| H | -1.39694300 | 4.58440300  | -2.46415700 | H                                         | 5.37144500  | -1.97304200 | -2.79681700 |
| C | -1.77398200 | 4.79109000  | 1.38851000  | H                                         | 3.78858100  | -4.55338400 | -2.29675200 |
| H | -0.70365500 | 2.92373200  | 1.45664900  | N                                         | 2.56031900  | -1.74947800 | -1.59986600 |
| C | -2.31039000 | 5.79230000  | 0.57559800  | C                                         | 3.84689200  | -1.85441000 | -1.31824700 |
| H | -2.58168500 | 6.48416500  | -1.45007300 | C                                         | 2.02655000  | -2.37121000 | -2.71238400 |
| H | -1.87124000 | 4.85159900  | 2.46894900  | O                                         | 4.36275000  | -1.23545200 | -0.31499700 |
| H | -2.82958500 | 6.63738300  | 1.01983700  | O                                         | 0.81999200  | -2.30562500 | -2.94994200 |
| C | -4.02442000 | 0.14235700  | 0.86627400  | H                                         | 5.58866600  | -3.08130800 | -1.45042500 |
| C | -4.48659200 | -0.89797900 | 1.68696900  | H                                         | 4.83383500  | -4.21063900 | -3.67260900 |
| C | -4.48729300 | 1.44612000  | 1.10602400  | H                                         | 3.29715200  | -2.40568900 | -4.43501500 |
| C | -5.40810500 | -0.64508500 | 2.70252500  | Pd                                        | -0.60552200 | 0.20351400  | 0.33604600  |
| H | -4.12885200 | -1.91120700 | 1.53408100  | P                                         | 2.68365100  | 0.25396000  | 1.60086900  |
| C | -5.40599200 | 1.69740000  | 2.12615700  | H                                         | 3.56488100  | -0.61953200 | 0.41167000  |
| H | -4.12850100 | 2.27777800  | 0.50790600  | C                                         | 3.00790900  | -1.85545000 | 3.23406300  |
| C | -5.87214000 | 0.65249400  | 2.92467100  | H                                         | 1.99588800  | -2.24651800 | 3.38534700  |
| H | -5.75700900 | -1.46415600 | 3.32551700  | H                                         | 3.41265800  | -2.31241500 | 2.32038600  |
| H | -5.75448800 | 2.71273900  | 2.29536100  | C                                         | 4.71472000  | 1.83562500  | 2.26883700  |
| H | -6.58762200 | 0.84862100  | 3.71865400  | H                                         | 4.89957800  | 1.28476500  | 3.19855800  |
| C | -3.18289800 | -1.79977100 | -1.15974300 | H                                         | 5.33221500  | 1.38521000  | 1.47786800  |
| C | -4.51899100 | -2.21724500 | -1.29719400 | O                                         | 1.19049400  | 0.56788500  | 1.42147900  |
| C | -2.15932000 | -2.59831400 | -1.68949800 | O                                         | 3.32625500  | 1.73222900  | 1.92216300  |
| C | -4.81874500 | -3.42067000 | -1.93454100 | O                                         | 2.94368700  | -0.42855700 | 3.08813500  |
| H | -5.32536100 | -1.60939700 | -0.89764800 | C                                         | 3.89221200  | -2.17804900 | 4.42843000  |
| C | -2.46638400 | -3.79714000 | -2.33817000 | H                                         | 4.91283600  | -1.81469000 | 4.26690400  |
| H | -1.12201000 | -2.28646900 | -1.62830700 | H                                         | 3.92997700  | -3.26165400 | 4.59142700  |
| C | -3.79192000 | -4.21392600 | -2.45526100 | H                                         | 3.49836400  | -1.70505000 | 5.33407800  |
| H | -5.85445200 | -3.73718900 | -2.02682900 | C                                         | 5.05040300  | 3.30873400  | 2.43371900  |
| H | -1.65836200 | -4.39260000 | -2.75264900 | H                                         | 6.10671300  | 3.42994100  | 2.70207600  |
| H | -4.02887500 | -5.15014800 | -2.95411000 | H                                         | 4.43714800  | 3.75371400  | 3.22413800  |
| O | -1.56587300 | -0.67551600 | 2.83100900  | H                                         | 4.85915900  | 3.85090000  | 1.50246900  |
| C | -0.97968400 | -1.09576800 | 1.85831900  |                                           |             |             |             |
| C | -0.42525600 | -2.49101800 | 1.81917000  |                                           |             |             |             |
| C | 0.42402100  | -2.92295600 | 0.79334600  | <b>7a</b>                                 |             |             |             |
| C | -0.77489000 | -3.37538800 | 2.85512700  | SCF energy: -3364.977863                  |             |             |             |
| C | 0.92255300  | -4.22693200 | 0.80738300  | SCF energy in solution: -3364.0336812000  |             |             |             |
| H | 0.71897700  | -2.24104100 | 0.00037800  | Free energy in solution: -3363.2790442000 |             |             |             |
| C | -0.28439200 | -4.67820700 | 2.85793000  | P                                         | 2.94741300  | 0.09007800  | 0.56129900  |
| H | -1.42553400 | -3.01702700 | 3.64683300  | C                                         | 1.20341900  | 3.19439900  | 2.32744400  |
| C | 0.56719600  | -5.10569300 | 1.83250400  | H                                         | 2.00525800  | 3.84313400  | 1.95587300  |
| H | 1.59072700  | -4.55197900 | 0.01465100  | H                                         | 0.54581300  | 3.82280600  | 2.93723300  |
| H | -0.55981700 | -5.36101100 | 3.65770700  | C                                         | 3.71367800  | 1.55846800  | 1.44290400  |
| H | 0.95245200  | -6.12241500 | 1.83629600  | H                                         | 4.79988200  | 1.41368100  | 1.41561200  |
| C | 2.94209500  | -3.12567400 | -3.68187800 | H                                         | 3.49966600  | 2.44147600  | 0.83024100  |
| C | 4.83919800  | -2.67219700 | -2.13458700 | C                                         | 1.79506100  | 2.04602000  | 3.17316000  |
| C | 4.13846500  | -3.75119300 | -2.96082100 | H                                         | 1.22213500  | 1.12145200  | 3.03018200  |

|   |             |             |             |    |             |             |             |
|---|-------------|-------------|-------------|----|-------------|-------------|-------------|
| H | 1.69106000  | 2.29232500  | 4.23662800  | H  | 5.13214900  | -2.96902600 | 3.83254400  |
| C | 3.28695800  | 1.78848000  | 2.90434700  | H  | 0.81691800  | -3.09357000 | 3.68053200  |
| H | 3.85907500  | 2.65548100  | 3.26444300  | H  | 2.98370500  | -3.89489700 | 4.67554000  |
| H | 3.61156700  | 0.93419600  | 3.50868700  | O  | 1.86781600  | -0.24147500 | -2.89036200 |
| P | 0.21115400  | 2.59661700  | 0.85392100  | C  | 1.37702700  | -0.75751300 | -1.91169700 |
| C | -1.47479500 | 2.45055300  | 1.58809900  | C  | 1.02492700  | -2.20988900 | -1.85598700 |
| C | -1.95077500 | 1.18456900  | 1.96288700  | C  | 0.31152600  | -2.75976500 | -0.78355500 |
| C | -2.27391800 | 3.58139900  | 1.82383000  | C  | 1.43565100  | -3.03557200 | -2.91957300 |
| C | -3.20176400 | 1.05867000  | 2.57408200  | C  | 0.01696700  | -4.12465400 | -0.76992500 |
| H | -1.37156300 | 0.28302600  | 1.77759500  | H  | -0.03630800 | -2.13784400 | 0.03535300  |
| C | -3.51954300 | 3.45037000  | 2.43582000  | C  | 1.14293300  | -4.39539200 | -2.89882300 |
| H | -1.92970600 | 4.56493300  | 1.51701100  | H  | 1.98424500  | -2.58922200 | -3.74295000 |
| C | -3.98500200 | 2.18730400  | 2.81424500  | C  | 0.43411500  | -4.94229500 | -1.82131800 |
| H | -3.56199200 | 0.06925000  | 2.83551400  | H  | -0.53651800 | -4.53643800 | 0.06826100  |
| H | -4.12956100 | 4.33299600  | 2.61074900  | H  | 1.46565700  | -5.03274400 | -3.71807400 |
| H | -4.95877200 | 2.08538900  | 3.28635900  | H  | 0.20811400  | -6.00560800 | -1.80603900 |
| C | 0.14064100  | 4.08866200  | -0.23185300 | C  | -3.06561400 | -3.73711200 | 2.76959300  |
| C | 0.40476300  | 5.38748500  | 0.23644300  | C  | -5.12166000 | -3.49562300 | 1.38953900  |
| C | -0.17368300 | 3.91061400  | -1.59099600 | C  | -4.16659000 | -4.50140400 | 2.03313900  |
| C | 0.35812800  | 6.48037900  | -0.63156200 | H  | -2.27143000 | -4.39371700 | 3.13887500  |
| H | 0.64450200  | 5.56008400  | 1.28118600  | H  | -5.68284300 | -2.96136300 | 2.17177000  |
| C | -0.22144200 | 5.00691700  | -2.45357800 | H  | -3.71679600 | -5.12986800 | 1.25167400  |
| H | -0.39128000 | 2.91592700  | -1.96693200 | N  | -3.09057700 | -2.10398200 | 0.85579900  |
| C | 0.04641000  | 6.29218700  | -1.97905200 | C  | -4.37463600 | -2.44743100 | 0.55390800  |
| H | 0.56515300  | 7.47769000  | -0.25207000 | C  | -2.41386300 | -2.66092900 | 1.88807500  |
| H | -0.46525700 | 4.85091400  | -3.50095100 | O  | -4.97780500 | -1.91132100 | -0.39168500 |
| H | 0.01281400  | 7.14288600  | -2.65461000 | O  | -1.24910200 | -2.30848000 | 2.16865200  |
| C | 4.27696800  | -0.36179400 | -0.63082600 | H  | -5.86341500 | -3.97110000 | 0.74098300  |
| C | 4.63013900  | -1.69950900 | -0.86513800 | H  | -4.70048800 | -5.17719600 | 2.71276500  |
| C | 4.88971700  | 0.64542500  | -1.39367600 | H  | -3.48831700 | -3.23249900 | 3.65210700  |
| C | 5.59160400  | -2.01783300 | -1.82582500 | Pd | 0.91334800  | 0.56766500  | -0.43824300 |
| H | 4.15939000  | -2.49508600 | -0.29675400 | P  | -2.34083000 | 0.17748600  | -1.56667500 |
| C | 5.85047000  | 0.32380300  | -2.35169000 | H  | -2.59404200 | -0.70409100 | -0.48875400 |
| H | 4.60973700  | 1.68597200  | -1.25502900 | C  | -2.61707900 | -2.06701900 | -3.00178400 |
| C | 6.20572500  | -1.00884700 | -2.56901400 | H  | -1.75874600 | -2.27960700 | -3.64620800 |
| H | 5.85799000  | -3.05816000 | -1.99207000 | H  | -2.42241300 | -2.48720600 | -2.01079500 |
| H | 6.31496100  | 1.11526900  | -2.93339600 | C  | -4.80191100 | 1.16286900  | -1.70389000 |
| H | 6.95265800  | -1.25914900 | -3.31738000 | H  | -5.00638000 | 0.99900500  | -2.76665900 |
| C | 2.97798700  | -1.22471400 | 1.84308200  | H  | -5.07012000 | 0.25729200  | -1.15135500 |
| C | 4.19228500  | -1.67215900 | 2.39782800  | O  | -0.93890800 | 0.76645600  | -1.58223100 |
| C | 1.77273400  | -1.74473800 | 2.32991900  | O  | -3.36724900 | 1.40479800  | -1.56670800 |
| C | 4.18946900  | -2.62727500 | 3.41306900  | O  | -2.72285500 | -0.61756300 | -2.91027400 |
| H | 5.13908800  | -1.28516800 | 2.03066500  | C  | -3.91219200 | -2.61605600 | -3.57051600 |
| C | 1.77317900  | -2.70512500 | 3.34548200  | H  | -4.72912600 | -2.44414300 | -2.86441600 |
| H | 0.81798900  | -1.42250900 | 1.93060900  | H  | -3.81210400 | -3.69569800 | -3.73600600 |
| C | 2.97922400  | -3.14653800 | 3.88716900  | H  | -4.14709100 | -2.14159600 | -4.52939900 |

|                                           |             |            |             |   |             |             |             |
|-------------------------------------------|-------------|------------|-------------|---|-------------|-------------|-------------|
| C                                         | -5.52437700 | 2.38796700 | -1.17725400 | C | 4.30817300  | -0.28878900 | -0.62228600 |
| H                                         | -6.60622500 | 2.25532300 | -1.29428700 | C | 4.69366800  | -1.63597500 | -0.69195400 |
| H                                         | -5.22343000 | 3.28641700 | -1.72663900 | C | 4.88643500  | 0.62937800  | -1.51356300 |
| H                                         | -5.30394900 | 2.53973200 | -0.11613000 | C | 5.65339700  | -2.04914400 | -1.61794600 |
| <b>TS5a</b>                               |             |            |             | H | 4.24823500  | -2.36519600 | -0.02295300 |
| SCF energy: -3364.972319                  |             |            |             | C | 5.84579600  | 0.21372700  | -2.43601200 |
| SCF energy in solution: -3364.024467      |             |            |             | H | 4.57850500  | 1.67115200  | -1.50482500 |
| Free energy in solution: -3363.2729002600 |             |            |             | C | 6.23380700  | -1.12654700 | -2.48925400 |
| P                                         | 2.98063200  | 0.27862000 | 0.52397400  | H | 5.94445400  | -3.09543700 | -1.65661200 |
| C                                         | 1.19241000  | 3.48772700 | 1.93382500  | H | 6.28284100  | 0.93680900  | -3.11919600 |
| H                                         | 1.96117000  | 4.06085600 | 1.40262300  | H | 6.97938400  | -1.45026500 | -3.21038400 |
| H                                         | 0.57934600  | 4.21200100 | 2.47975400  | C | 3.05070900  | -0.89063000 | 1.94224600  |
| C                                         | 3.75093000  | 1.84313400 | 1.22082800  | C | 4.27059900  | -1.20302100 | 2.57060600  |
| H                                         | 4.83757800  | 1.70250700 | 1.19461100  | C | 1.86520400  | -1.44286300 | 2.44402400  |
| H                                         | 3.52337500  | 2.64403600 | 0.50825900  | C | 4.29591400  | -2.05403300 | 3.67455300  |
| C                                         | 1.84368500  | 2.47961100 | 2.90617100  | H | 5.20274000  | -0.79194200 | 2.19189500  |
| H                                         | 1.31540100  | 1.51916600 | 2.87696000  | C | 1.89402700  | -2.29771200 | 3.54919300  |
| H                                         | 1.73516400  | 2.84346800 | 3.93462100  | H | 0.90937800  | -1.22178400 | 1.98275200  |
| C                                         | 3.34086500  | 2.24868000 | 2.64834100  | C | 3.10644400  | -2.60360200 | 4.16557600  |
| H                                         | 3.88532400  | 3.17464200 | 2.88241900  | H | 5.24398600  | -2.29073500 | 4.15036700  |
| H                                         | 3.70496100  | 1.49176900 | 3.35202500  | H | 0.95755000  | -2.71575900 | 3.90538000  |
| P                                         | 0.10778200  | 2.65790200 | 0.65305800  | H | 3.13136800  | -3.26918400 | 5.02455100  |
| C                                         | -1.47968800 | 2.51306200 | 1.58251000  | O | 1.91964100  | -0.30353900 | -2.86575700 |
| C                                         | -1.86574300 | 1.26201600 | 2.08377100  | C | 1.43838600  | -0.80710900 | -1.87570100 |
| C                                         | -2.28221800 | 3.63474500 | 1.84711600  | C | 1.14520100  | -2.27211800 | -1.78788500 |
| C                                         | -3.02727400 | 1.14165700 | 2.85199500  | C | 0.45716800  | -2.82625200 | -0.70226400 |
| H                                         | -1.28392900 | 0.36959200 | 1.86992600  | C | 1.58413500  | -3.10265400 | -2.83478900 |
| C                                         | -3.44253900 | 3.50916900 | 2.60953200  | C | 0.21113900  | -4.20021200 | -0.66222000 |
| H                                         | -2.00889000 | 4.60673800 | 1.44548100  | H | 0.09514900  | -2.19218000 | 0.10081600  |
| C                                         | -3.81568400 | 2.26092000 | 3.11752300  | C | 1.34115400  | -4.47190500 | -2.78766200 |
| H                                         | -3.31457100 | 0.16479300 | 3.22950200  | H | 2.11343600  | -2.65216400 | -3.66838900 |
| H                                         | -4.05792200 | 4.38398500 | 2.80345300  | C | 0.65402600  | -5.02320100 | -1.69938600 |
| H                                         | -4.72089700 | 2.16386500 | 3.71142900  | H | -0.32697300 | -4.62124500 | 0.18215300  |
| C                                         | -0.18206600 | 3.99901200 | -0.58229900 | H | 1.68452500  | -5.11251900 | -3.59590600 |
| C                                         | 0.10402700  | 5.35044000 | -0.32189100 | H | 0.46440100  | -6.09312200 | -1.66378800 |
| C                                         | -0.69556700 | 3.64434200 | -1.84266200 | C | -2.87413900 | -3.56453000 | 2.89397700  |
| C                                         | -0.11850900 | 6.32500700 | -1.29709000 | C | -4.97662200 | -3.70971200 | 1.56722600  |
| H                                         | 0.49935500  | 5.65742200 | 0.64145700  | C | -3.89736900 | -4.52327800 | 2.28293800  |
| C                                         | -0.91871900 | 4.62394200 | -2.81140000 | H | -2.00897300 | -4.08442900 | 3.31652800  |
| H                                         | -0.92406000 | 2.60482800 | -2.05716900 | H | -5.57211500 | -3.14876600 | 2.30335700  |
| C                                         | -0.62999200 | 5.96358400 | -2.54431900 | H | -3.39715700 | -5.18492900 | 1.56267700  |
| H                                         | 0.10843000  | 7.36552200 | -1.07905600 | N | -3.12105000 | -2.19662000 | 0.81496200  |
| H                                         | -1.31564100 | 4.33334100 | -3.78032100 | C | -4.38303100 | -2.69386200 | 0.58924000  |
| H                                         | -0.80089800 | 6.72222500 | -3.30369700 | C | -2.34908200 | -2.54325000 | 1.88058400  |
|                                           |             |            |             | O | -5.04658600 | -2.31722200 | -0.37920200 |
|                                           |             |            |             | O | -1.22921900 | -2.03810200 | 2.06482300  |

|                                           |             |             |             |   |             |             |             |
|-------------------------------------------|-------------|-------------|-------------|---|-------------|-------------|-------------|
| H                                         | -5.67759800 | -4.33436900 | 1.00622900  | C | 2.87736100  | -0.78420700 | 3.52483400  |
| H                                         | -4.33694500 | -5.16829300 | 3.05280200  | H | 1.17205000  | -0.38923200 | 2.26739400  |
| H                                         | -3.33624300 | -3.00208400 | 3.71946500  | C | 4.63598800  | -2.10490700 | 2.52430800  |
| Pd                                        | 0.90085600  | 0.54971700  | -0.45828300 | H | 4.29961600  | -2.75770600 | 0.50432300  |
| P                                         | -2.37617900 | -0.17601300 | -1.37213400 | C | 4.12953500  | -1.39242900 | 3.61536800  |
| H                                         | -2.69032600 | -1.23924100 | -0.18415400 | H | 2.48542000  | -0.21234300 | 4.36172000  |
| C                                         | -2.56727300 | -2.21010300 | -3.09997100 | H | 5.61647400  | -2.57012400 | 2.58482800  |
| H                                         | -1.72828000 | -2.26104400 | -3.80330000 | H | 4.71424400  | -1.30488900 | 4.52732400  |
| H                                         | -2.27057700 | -2.74089700 | -2.18717100 | C | 2.74088700  | -1.82190200 | -1.66546300 |
| C                                         | -4.80300000 | 0.93163200  | -1.49242400 | C | 3.26664300  | -3.00870500 | -2.20599300 |
| H                                         | -5.01625100 | 0.81977600  | -2.56122000 | C | 3.11317900  | -0.58985600 | -2.23341300 |
| H                                         | -5.12238200 | 0.01434200  | -0.98703000 | C | 4.14757200  | -2.96612300 | -3.28861300 |
| O                                         | -0.97464200 | 0.45361600  | -1.49610100 | H | 3.00053000  | -3.97531600 | -1.79014200 |
| O                                         | -3.37452700 | 1.11134500  | -1.33588700 | C | 3.99718400  | -0.55689800 | -3.31297400 |
| O                                         | -2.81394100 | -0.81880600 | -2.81383400 | H | 2.71093600  | 0.33200400  | -1.82178600 |
| C                                         | -3.82750500 | -2.82614900 | -3.68540300 | C | 4.51501000  | -1.73960400 | -3.84419600 |
| H                                         | -4.63201900 | -2.80565500 | -2.94464200 | H | 4.54537400  | -3.89279500 | -3.69474000 |
| H                                         | -3.63856200 | -3.86682800 | -3.97640300 | H | 4.27675100  | 0.40245000  | -3.74002000 |
| H                                         | -4.14703700 | -2.27251600 | -4.57497600 | H | 5.20023600  | -1.70746900 | -4.68750500 |
| C                                         | -5.49318000 | 2.15612800  | -0.91682500 | C | -3.48169900 | -0.79216200 | -1.44367300 |
| H                                         | -6.57844700 | 2.07125500  | -1.04873500 | C | -4.58156100 | -0.05306400 | -0.98354100 |
| H                                         | -5.15242600 | 3.06627000  | -1.42222500 | C | -3.35843400 | -1.03768400 | -2.82071900 |
| H                                         | -5.27686800 | 2.25604300  | 0.15170500  | C | -5.54846300 | 0.40748400  | -1.87923400 |
|                                           |             |             |             | H | -4.68833500 | 0.16523700  | 0.07411700  |
|                                           |             |             |             | C | -4.32653700 | -0.57793000 | -3.71249300 |
| <b>8a</b>                                 |             |             |             | H | -2.49616800 | -1.57358700 | -3.20748700 |
| SCF energy: -2964.999337                  |             |             |             | C | -5.42622600 | 0.14366300  | -3.24397800 |
| SCF energy in solution: -2964.1695163100  |             |             |             | H | -6.39677500 | 0.97510900  | -1.50613500 |
| Free energy in solution: -2963.5283613100 |             |             |             | H | -4.21498900 | -0.77585200 | -4.77498500 |
| P                                         | -2.13533800 | -1.34536400 | -0.31141600 | H | -6.17872700 | 0.50434200  | -3.93988000 |
| C                                         | 1.08082600  | -3.61140200 | -0.08442200 | C | -2.96624000 | -1.53149600 | 1.32410600  |
| H                                         | 0.82205200  | -3.98023000 | -1.08402200 | C | -4.17451800 | -2.23930200 | 1.45448900  |
| H                                         | 1.96261500  | -4.17396000 | 0.23958200  | C | -2.36229300 | -1.00956700 | 2.47556800  |
| C                                         | -1.91056900 | -3.12632000 | -0.86397700 | C | -4.76025100 | -2.41552900 | 2.70758100  |
| H                                         | -2.87298800 | -3.46581400 | -1.26325300 | H | -4.66648800 | -2.64440400 | 0.57432200  |
| H                                         | -1.21491800 | -3.09591300 | -1.71043200 | C | -2.94921400 | -1.18625300 | 3.73119600  |
| C                                         | -0.09365200 | -3.83847100 | 0.89250800  | H | -1.42992500 | -0.46158200 | 2.38105600  |
| H                                         | -0.20815800 | -2.98047800 | 1.56658800  | C | -4.14807600 | -1.88894000 | 3.84877100  |
| H                                         | 0.13597600  | -4.69101200 | 1.54274500  | H | -5.69532600 | -2.96245500 | 2.79343300  |
| C                                         | -1.43177200 | -4.13437100 | 0.19640400  | H | -2.46926700 | -0.77220500 | 4.61367500  |
| H                                         | -1.35569900 | -5.10894700 | -0.30655600 | H | -4.60685800 | -2.02591700 | 4.82421600  |
| H                                         | -2.20888500 | -4.24530100 | 0.96119100  | O | -1.53420600 | 1.73431300  | -2.07061600 |
| P                                         | 1.56341100  | -1.80786300 | -0.24484800 | C | -1.37864900 | 1.56165400  | -0.88193000 |
| C                                         | 2.62366900  | -1.61634400 | 1.25518500  | C | -1.93480900 | 2.52375400  | 0.12766000  |
| C                                         | 2.13175200  | -0.89164200 | 2.34879200  | C | -1.57086800 | 2.47792200  | 1.47808600  |
| C                                         | 3.88874900  | -2.21571500 | 1.35197500  | C | -2.84940200 | 3.49670700  | -0.31032800 |



|                                       |             |             |             |   |             |             |             |
|---------------------------------------|-------------|-------------|-------------|---|-------------|-------------|-------------|
| C                                     | -2.10934600 | 3.39344800  | 2.38306500  | P | 2.10211300  | -1.16365800 | -0.60603600 |
| H                                     | -0.84107000 | 1.74380000  | 1.80327900  | C | 3.03063500  | -1.44818100 | 0.96133800  |
| C                                     | -3.39621600 | 4.40121000  | 0.59558200  | C | 2.47605900  | -1.06285000 | 2.18859300  |
| H                                     | -3.11396500 | 3.52231800  | -1.36267700 | C | 4.28529000  | -2.08349600 | 0.93627000  |
| C                                     | -3.02602100 | 4.35115400  | 1.94422800  | C | 3.16969800  | -1.31766700 | 3.37677700  |
| H                                     | -1.80827700 | 3.36462400  | 3.42677300  | H | 1.52511200  | -0.53567500 | 2.20681400  |
| H                                     | -4.10731500 | 5.14910600  | 0.25415100  | C | 4.96849400  | -2.33640800 | 2.12351700  |
| H                                     | -3.44888100 | 5.06162600  | 2.65002800  | H | 4.73677200  | -2.36793800 | -0.01081100 |
| Pd                                    | -0.22175000 | -0.03890300 | -0.38576300 | C | 4.40925900  | -1.95448200 | 3.34777000  |
| P                                     | 1.98653300  | 2.37934700  | 0.47103900  | H | 2.73754600  | -1.00291400 | 4.32276700  |
| C                                     | 1.20079700  | 4.64301800  | -0.70145700 | H | 5.93894100  | -2.82521500 | 2.09482800  |
| H                                     | 0.49669100  | 4.23165000  | -1.43798900 | H | 4.94634800  | -2.14772700 | 4.27288500  |
| H                                     | 0.64312800  | 4.79553500  | 0.23675300  | C | 3.40289200  | -0.48243000 | -1.72019100 |
| C                                     | 4.56227500  | 2.60268600  | 1.10387000  | C | 3.70838000  | -1.04684700 | -2.96764600 |
| H                                     | 4.74074000  | 3.54370000  | 0.56695500  | C | 4.08231700  | 0.68043900  | -1.31769000 |
| H                                     | 4.20991500  | 2.86359600  | 2.11543600  | C | 4.67752600  | -0.46654300 | -3.79043800 |
| O                                     | 1.34797200  | 1.34030800  | -0.54314800 | H | 3.19943200  | -1.94274300 | -3.30938800 |
| O                                     | 3.57599500  | 1.83733200  | 0.41569900  | C | 5.05066400  | 1.25443100  | -2.13908000 |
| O                                     | 2.27776200  | 3.73218900  | -0.50063400 | H | 3.84681800  | 1.14117000  | -0.36197200 |
| C                                     | 1.76669300  | 5.96705200  | -1.19569600 | C | 5.35170100  | 0.68262800  | -3.37802900 |
| H                                     | 2.45016500  | 6.39518800  | -0.45420300 | H | 4.90518600  | -0.91828100 | -4.75243600 |
| H                                     | 0.95998500  | 6.68624400  | -1.38351400 | H | 5.56523900  | 2.15397700  | -1.81295700 |
| H                                     | 2.32357200  | 5.81983400  | -2.12728400 | H | 6.10510400  | 1.13293500  | -4.01859400 |
| C                                     | 5.84134800  | 1.78258200  | 1.18990600  | C | -3.28870400 | -1.09810600 | -1.09820200 |
| H                                     | 6.62883600  | 2.35058100  | 1.70069200  | C | -4.11663800 | -0.31929000 | -0.27286700 |
| H                                     | 6.19611200  | 1.52345600  | 0.18652800  | C | -3.73910100 | -1.42613300 | -2.38540700 |
| H                                     | 5.66492800  | 0.85265000  | 1.74027500  | C | -5.37067000 | 0.09744400  | -0.71616700 |
|                                       |             |             |             | H | -3.78159400 | -0.04457200 | 0.72323600  |
|                                       |             |             |             | C | -4.99737600 | -1.00954300 | -2.82677200 |
| <b>TS6a</b>                           |             |             |             | H | -3.11661200 | -2.00804300 | -3.05776400 |
| SCF energy: -2964.957636              |             |             |             | C | -5.81799900 | -0.25095700 | -1.99281700 |
| SCF energy in solution: -2964.127094  |             |             |             | H | -5.99963600 | 0.69443300  | -0.06135500 |
| Free energy in solution: -2963.487047 |             |             |             | H | -5.33299400 | -1.28108600 | -3.82439000 |
| P                                     | -1.63665900 | -1.61886300 | -0.44875100 | H | -6.79795400 | 0.07036200  | -2.33541400 |
| C                                     | 1.86093900  | -2.90700700 | -1.21588300 | C | -2.10479200 | -2.35159300 | 1.17994000  |
| H                                     | 1.42301900  | -2.84911700 | -2.21842400 | C | -2.99255700 | -3.44116600 | 1.24517100  |
| H                                     | 2.84445900  | -3.37652300 | -1.32537000 | C | -1.59404600 | -1.80670900 | 2.36677800  |
| C                                     | -1.26411900 | -3.12291100 | -1.50979300 | C | -3.34512200 | -3.99186600 | 2.47549800  |
| H                                     | -2.21160400 | -3.59092700 | -1.79871000 | H | -3.42222500 | -3.85277000 | 0.33533000  |
| H                                     | -0.81723200 | -2.72972300 | -2.43084900 | C | -1.95809400 | -2.36257700 | 3.59881500  |
| C                                     | 0.95627400  | -3.72741200 | -0.26379700 | H | -0.94587100 | -0.93239500 | 2.32595000  |
| H                                     | 0.72663200  | -3.15593100 | 0.64358400  | C | -2.82333800 | -3.45397500 | 3.65667600  |
| H                                     | 1.50949600  | -4.60662300 | 0.08475500  | H | -4.02995000 | -4.83507400 | 2.51423100  |
| C                                     | -0.35908400 | -4.20636300 | -0.89286500 | H | -1.56301200 | -1.93069300 | 4.51466100  |
| H                                     | -0.13938200 | -4.93580800 | -1.68538400 | H | -3.10052600 | -3.88217700 | 4.61661600  |
| H                                     | -0.92512100 | -4.74648400 | -0.12570200 | O | 1.42691200  | 2.54542100  | -1.95123300 |

|                                           |             |             |             |   |             |             |             |
|-------------------------------------------|-------------|-------------|-------------|---|-------------|-------------|-------------|
| C                                         | 0.77775300  | 1.72807800  | -1.44933000 | H | 0.29011400  | -0.69159600 | 4.40759900  |
| C                                         | -1.21606200 | 1.70418800  | -1.52323800 | C | -1.21233300 | -1.82148300 | 3.37167900  |
| C                                         | -1.83813300 | 2.63412700  | -0.68116400 | H | -1.09451800 | -2.62407400 | 4.11321700  |
| C                                         | -1.65955400 | 1.53131000  | -2.84250400 | H | -2.05560000 | -1.21007000 | 3.71630500  |
| C                                         | -2.93713200 | 3.35428000  | -1.15814800 | P | 1.73767500  | -1.04645100 | 1.01886500  |
| H                                         | -1.47435500 | 2.79915200  | 0.32894900  | C | 3.28060100  | -0.09161500 | 1.38095400  |
| C                                         | -2.75887900 | 2.25573400  | -3.30621300 | C | 3.38446900  | 0.67397100  | 2.55291100  |
| H                                         | -1.14516600 | 0.84319400  | -3.50773900 | C | 4.34763100  | -0.08451800 | 0.47045700  |
| C                                         | -3.39977300 | 3.16652000  | -2.46258300 | C | 4.54007100  | 1.40860300  | 2.82385700  |
| H                                         | -3.42604800 | 4.07238900  | -0.50413700 | H | 2.56400000  | 0.70802800  | 3.26485600  |
| H                                         | -3.10779500 | 2.11398300  | -4.32602700 | C | 5.50333300  | 0.64751300  | 0.74624300  |
| H                                         | -4.25091900 | 3.73654300  | -2.82653600 | H | 4.26688600  | -0.63162700 | -0.46145200 |
| Pd                                        | 0.08133400  | 0.17501900  | -0.63468200 | C | 5.60669700  | 1.39185000  | 1.92350300  |
| P                                         | 0.41388300  | 2.06572100  | 2.52124600  | H | 4.60532200  | 1.99036700  | 3.73977300  |
| C                                         | -1.83914200 | 3.20732500  | 3.42615300  | H | 6.32493400  | 0.63521000  | 0.03490200  |
| H                                         | -2.63012300 | 2.47571400  | 3.19725100  | H | 6.51000800  | 1.95763600  | 2.13597400  |
| H                                         | -1.38074700 | 2.89900300  | 4.38002400  | C | 2.35722600  | -2.55412500 | 0.15955500  |
| C                                         | 1.88736200  | 4.12321600  | 1.66313700  | C | 3.04743500  | -3.57110400 | 0.84158800  |
| H                                         | 1.11360300  | 4.88508700  | 1.50027900  | C | 2.13122200  | -2.68831000 | -1.21899900 |
| H                                         | 2.16453900  | 4.16419300  | 2.72857200  | C | 3.48356200  | -4.70841100 | 0.16278700  |
| O                                         | -0.06609500 | 0.80546300  | 1.74601400  | H | 3.25773500  | -3.47498800 | 1.90332200  |
| O                                         | 1.36423900  | 2.83655400  | 1.33767000  | C | 2.57519100  | -3.82723000 | -1.89611200 |
| O                                         | -0.86718400 | 3.21494300  | 2.39028000  | H | 1.64421400  | -1.88503500 | -1.76195200 |
| C                                         | -2.44125900 | 4.59996800  | 3.56544900  | C | 3.24393900  | -4.83979500 | -1.20787800 |
| H                                         | -1.66559100 | 5.32818900  | 3.82570200  | H | 4.01493300  | -5.48848000 | 0.70192300  |
| H                                         | -3.21139900 | 4.61521100  | 4.34675500  | H | 2.39758000  | -3.91744100 | -2.96424600 |
| H                                         | -2.90076600 | 4.91782200  | 2.62262200  | H | 3.58480500  | -5.72618600 | -1.73660400 |
| C                                         | 3.10712900  | 4.40577700  | 0.79698400  | C | -2.21774900 | -2.50738400 | -0.78992900 |
| H                                         | 3.50585800  | 5.40571300  | 1.00869800  | C | -2.29336300 | -1.97627100 | -2.09094300 |
| H                                         | 2.84629900  | 4.35439200  | -0.26521200 | C | -2.36627000 | -3.89304900 | -0.61396400 |
| H                                         | 3.89701500  | 3.67135800  | 0.99307900  | C | -2.51879700 | -2.81681800 | -3.18168800 |
|                                           |             |             |             | H | -2.18602400 | -0.90582300 | -2.24398300 |
|                                           |             |             |             | C | -2.58429300 | -4.72927500 | -1.71144900 |
| <b>9a</b>                                 |             |             |             | H | -2.31288400 | -4.33670100 | 0.37412800  |
| SCF energy: -2965.031330                  |             |             |             | C | -2.66168300 | -4.19361100 | -2.99730900 |
| SCF energy in solution: -2964.1994459000  |             |             |             | H | -2.57681300 | -2.39085000 | -4.17979500 |
| Free energy in solution: -2963.5534579000 |             |             |             | H | -2.69342000 | -5.79954800 | -1.55680900 |
| P                                         | -1.89975900 | -1.33778900 | 0.60389800  | H | -2.83108700 | -4.84562800 | -3.85021300 |
| C                                         | 1.29195100  | -1.66807300 | 2.74179200  | C | -3.56451600 | -0.68098100 | 1.05771300  |
| H                                         | 1.11321800  | -2.74496000 | 2.66093400  | C | -4.75020900 | -1.34134600 | 0.70002300  |
| H                                         | 2.17352400  | -1.55384100 | 3.37870200  | C | -3.64379400 | 0.48623600  | 1.83319800  |
| C                                         | -1.57580000 | -2.49304500 | 2.03676000  | C | -5.98679900 | -0.84620600 | 1.11546300  |
| H                                         | -2.46869500 | -3.11125900 | 2.18540700  | H | -4.70830500 | -2.23839900 | 0.08963700  |
| H                                         | -0.77122400 | -3.16538400 | 1.71733700  | C | -4.88207700 | 0.97569900  | 2.25352400  |
| C                                         | 0.06551300  | -0.96215900 | 3.36828300  | H | -2.73902000 | 1.02896300  | 2.09025800  |
| H                                         | -0.13247600 | -0.01851400 | 2.84481400  | C | -6.05545000 | 0.31073000  | 1.89506400  |

|                                           |             |             |             |   |             |             |             |
|-------------------------------------------|-------------|-------------|-------------|---|-------------|-------------|-------------|
| H                                         | -6.89772000 | -1.36362800 | 0.82600500  | H | -2.87315200 | 3.01322500  | -1.59847500 |
| H                                         | -4.92666400 | 1.88499800  | 2.84648000  | H | -1.16380600 | 3.08934600  | -1.16720700 |
| H                                         | -7.02012300 | 0.69638000  | 2.21399200  | C | -0.26437900 | 1.38902400  | -3.35168600 |
| O                                         | -2.20794600 | 1.19696000  | -1.85295800 | H | -0.31434800 | 0.35498000  | -2.98821700 |
| C                                         | -1.54560600 | 1.47265200  | -0.86410200 | H | -0.16021200 | 1.32649200  | -4.44306400 |
| C                                         | -1.82230200 | 2.75695000  | -0.12049400 | C | -1.59633500 | 2.10813800  | -3.06798400 |
| C                                         | -0.99123900 | 3.20982300  | 0.91250500  | H | -1.59512300 | 3.05978700  | -3.61889300 |
| C                                         | -2.96290100 | 3.50190700  | -0.46231000 | H | -2.41140100 | 1.51202100  | -3.49723600 |
| C                                         | -1.29608200 | 4.38772900  | 1.59687300  | P | 1.55165700  | 1.41082900  | -1.09790500 |
| H                                         | -0.09208200 | 2.64993300  | 1.15235100  | C | 3.26709100  | 0.83360100  | -1.49205400 |
| C                                         | -3.26912800 | 4.67409000  | 0.22375600  | C | 3.46868900  | -0.02995500 | -2.58286300 |
| H                                         | -3.59444600 | 3.13992000  | -1.26737600 | C | 4.36918200  | 1.16425200  | -0.68902500 |
| C                                         | -2.43659700 | 5.11875200  | 1.25682200  | C | 4.73842900  | -0.52711800 | -2.87742700 |
| H                                         | -0.63927000 | 4.73886100  | 2.38861700  | H | 2.62872600  | -0.32011000 | -3.21027200 |
| H                                         | -4.15496900 | 5.24455200  | -0.04433400 | C | 5.63949200  | 0.66269400  | -0.98231300 |
| H                                         | -2.67438600 | 6.03584600  | 1.79024200  | H | 4.23976000  | 1.82333600  | 0.16361500  |
| Pd                                        | -0.12886100 | 0.19546200  | -0.08746900 | C | 5.83108800  | -0.18000900 | -2.07862500 |
| P                                         | 1.40422500  | 1.39470600  | -1.37914700 | H | 4.87371900  | -1.18607400 | -3.73136500 |
| C                                         | 0.44284300  | 1.91043000  | -3.83021700 | H | 6.48227900  | 0.93910400  | -0.35374900 |
| H                                         | 1.27809700  | 1.29572900  | -4.18273300 | H | 6.82119400  | -0.56442600 | -2.30832600 |
| H                                         | -0.45768900 | 1.28562300  | -3.77906400 | C | 1.84215600  | 2.91924700  | -0.07576400 |
| C                                         | 3.10215800  | 3.40776400  | -0.94117400 | C | 2.37950600  | 4.10534500  | -0.60625700 |
| H                                         | 3.96993700  | 2.78934700  | -1.19654400 | C | 1.51849500  | 2.86665400  | 1.29017300  |
| H                                         | 2.74187000  | 3.89530800  | -1.85355900 | C | 2.57112700  | 5.22200800  | 0.20674200  |
| O                                         | 2.42289700  | 0.48904800  | -2.03184800 | H | 2.66045300  | 4.15802800  | -1.65493100 |
| O                                         | 2.05877200  | 2.55901900  | -0.41819000 | C | 1.71940200  | 3.98723700  | 2.10239700  |
| O                                         | 0.74262200  | 2.40906300  | -2.51601800 | H | 1.12762900  | 1.94688100  | 1.71993400  |
| C                                         | 0.21131500  | 3.10265100  | -4.74485200 | C | 2.23771600  | 5.16488300  | 1.56339300  |
| H                                         | -0.62000200 | 3.71460500  | -4.37941200 | H | 2.98425300  | 6.13420300  | -0.21632700 |
| H                                         | -0.02983600 | 2.76021500  | -5.75842400 | H | 1.46473300  | 3.93341200  | 3.15732800  |
| H                                         | 1.10650600  | 3.73197900  | -4.79561600 | H | 2.38689400  | 6.03598300  | 2.19631100  |
| C                                         | 3.45221000  | 4.43302600  | 0.12378300  | C | -2.74033000 | 1.76858800  | 1.10734600  |
| H                                         | 4.24163500  | 5.10189200  | -0.24023200 | C | -2.85881900 | 0.94409100  | 2.24159800  |
| H                                         | 3.80877100  | 3.93739000  | 1.03234300  | C | -3.07889900 | 3.12645800  | 1.22095900  |
| H                                         | 2.57557200  | 5.03882600  | 0.37740300  | C | -3.32482300 | 1.46667100  | 3.44760900  |
|                                           |             |             |             | H | -2.56751100 | -0.10085200 | 2.18294200  |
|                                           |             |             |             | C | -3.53640500 | 3.64641800  | 2.43479700  |
| <b>TS7a</b>                               |             |             |             | H | -2.98743700 | 3.79459100  | 0.37144300  |
| SCF energy: -2964.994199                  |             |             |             | C | -3.66535900 | 2.81766600  | 3.54922200  |
| SCF energy in solution: -2964.1676930000  |             |             |             | H | -3.40974200 | 0.81593400  | 4.31389200  |
| Free energy in solution: -2963.5232020000 |             |             |             | H | -3.79155000 | 4.70085900  | 2.50442900  |
| P                                         | -2.11236300 | 0.98543900  | -0.44391100 | H | -4.02217000 | 3.22307400  | 4.49254300  |
| C                                         | 0.98964300  | 2.08437300  | -2.77520000 | C | -3.60380100 | 0.14526300  | -1.14362700 |
| H                                         | 0.81138600  | 3.16041900  | -2.66782500 | C | -4.91252900 | 0.58261100  | -0.88347700 |
| H                                         | 1.82982000  | 1.97757600  | -3.46836100 | C | -3.41366400 | -0.94830600 | -2.00188200 |
| C                                         | -1.93635600 | 2.44320800  | -1.60337000 | C | -6.00260300 | -0.05535100 | -1.47611600 |

|                                           |             |             |             |   |             |             |             |
|-------------------------------------------|-------------|-------------|-------------|---|-------------|-------------|-------------|
| H                                         | -5.08104800 | 1.41824800  | -0.21027700 | C | 0.96410400  | -2.11414900 | 1.59159700  |
| C                                         | -4.50534800 | -1.58200700 | -2.59990000 | H | 0.24893500  | -2.55516900 | 0.88699500  |
| H                                         | -2.40822600 | -1.31564700 | -2.18538900 | H | 1.51637600  | -2.93771400 | 2.06199500  |
| C                                         | -5.80162000 | -1.13693500 | -2.33785700 | C | -2.06540100 | -2.48284500 | 2.61692200  |
| H                                         | -7.01061600 | 0.29104500  | -1.26256400 | H | -1.78940300 | -3.05441900 | 1.72184700  |
| H                                         | -4.33962400 | -2.43115200 | -3.25757400 | H | -2.55190500 | -1.55938100 | 2.27686600  |
| H                                         | -6.65284500 | -1.63413300 | -2.79568500 | C | 0.22344800  | -1.29930000 | 2.66530700  |
| O                                         | -1.62008400 | -2.02075900 | 1.63841800  | H | -0.26958000 | -0.43457200 | 2.20023900  |
| C                                         | -0.71197400 | -1.96267500 | 0.80075300  | H | 0.95764900  | -0.89597000 | 3.37344400  |
| C                                         | -0.64602300 | -2.94008100 | -0.33921600 | C | -0.82264100 | -2.11939400 | 3.44521100  |
| C                                         | 0.46084900  | -3.04758600 | -1.20089600 | H | -0.35193600 | -3.03174600 | 3.83585200  |
| C                                         | -1.77907200 | -3.74077500 | -0.57635800 | H | -1.13855900 | -1.53696700 | 4.32024800  |
| C                                         | 0.41815200  | -3.92077300 | -2.29101900 | P | 2.13230300  | -1.07366600 | 0.57260100  |
| H                                         | 1.36385900  | -2.48336500 | -0.99745500 | C | 3.40666500  | -0.57239500 | 1.80209600  |
| C                                         | -1.81111600 | -4.61453600 | -1.65840900 | C | 4.29775000  | -1.51115700 | 2.34604500  |
| H                                         | -2.62139900 | -3.65393100 | 0.10166800  | C | 3.46075600  | 0.75726000  | 2.24308200  |
| C                                         | -0.71423100 | -4.70233400 | -2.52435100 | C | 5.21845100  | -1.12769700 | 3.32053600  |
| H                                         | 1.28100000  | -4.00250200 | -2.94703100 | H | 4.28069700  | -2.54105200 | 1.99927400  |
| H                                         | -2.68954000 | -5.23183500 | -1.82943600 | C | 4.38119100  | 1.13752100  | 3.22236000  |
| H                                         | -0.73938200 | -5.38783500 | -3.36766700 | H | 2.79640100  | 1.49872800  | 1.80948900  |
| Pd                                        | -0.04546900 | -0.13837900 | -0.12760300 | C | 5.25950200  | 0.19748500  | 3.76222900  |
| P                                         | 1.06857500  | -1.48631300 | 1.81083200  | H | 5.90621900  | -1.86178100 | 3.73202700  |
| C                                         | 0.20779700  | -2.82208100 | 3.98092400  | H | 4.41636000  | 2.17164400  | 3.55437900  |
| H                                         | 0.25091100  | -1.83010400 | 4.44160100  | H | 5.97923600  | 0.49591500  | 4.51994700  |
| H                                         | -0.82978300 | -3.03447100 | 3.70421900  | C | 2.99195700  | -2.28596800 | -0.51625200 |
| C                                         | 3.67997500  | -2.07828900 | 1.67143200  | C | 2.63817900  | -3.64337800 | -0.56872500 |
| H                                         | 4.10125100  | -1.08960300 | 1.88183900  | C | 4.02412000  | -1.81388700 | -1.34867100 |
| H                                         | 3.49806500  | -2.59539200 | 2.61790100  | C | 3.30651900  | -4.51608200 | -1.43142200 |
| O                                         | 1.12184900  | -0.22865400 | 2.62935200  | H | 1.84511900  | -4.03533400 | 0.05952800  |
| O                                         | 2.41634700  | -1.89289900 | 0.98110500  | C | 4.69062700  | -2.69396200 | -2.20102100 |
| O                                         | 1.00079600  | -2.81643200 | 2.77450700  | H | 4.28725200  | -0.75871400 | -1.33386800 |
| C                                         | 0.76685700  | -3.88873200 | 4.90822400  | C | 4.33551200  | -4.04470100 | -2.24651000 |
| H                                         | 0.74924900  | -4.87175300 | 4.42578500  | H | 3.02161100  | -5.56461800 | -1.46038800 |
| H                                         | 0.16355200  | -3.94217300 | 5.82217800  | H | 5.48882200  | -2.31890000 | -2.83628800 |
| H                                         | 1.80045000  | -3.66044700 | 5.18989700  | H | 4.85621800  | -4.72503500 | -2.91538800 |
| C                                         | 4.59517500  | -2.88884000 | 0.77144400  | C | -4.65621500 | -3.77083500 | 2.37610600  |
| H                                         | 5.56587700  | -3.03292200 | 1.26108300  | C | -5.73754200 | -4.57279500 | 2.78629400  |
| H                                         | 4.76196300  | -2.37281300 | -0.17901000 | C | -4.69106100 | -3.22265900 | 1.08448000  |
| H                                         | 4.16136900  | -3.87325500 | 0.56717200  | C | -6.80497700 | -4.83445400 | 1.92997000  |
|                                           |             |             |             | H | -5.74007500 | -4.99795700 | 3.78761700  |
|                                           |             |             |             | C | -5.76769800 | -3.47553800 | 0.22862600  |
| <b>10a</b>                                |             |             |             | H | -3.88088600 | -2.59275100 | 0.73078400  |
| SCF energy: -2965.017365                  |             |             |             | C | -6.82477000 | -4.28359500 | 0.64534600  |
| SCF energy in solution: -2964.1608224300  |             |             |             | H | -7.62567100 | -5.46253300 | 2.26705200  |
| Free energy in solution: -2963.5258394300 |             |             |             | H | -5.77350800 | -3.04016700 | -0.76752600 |
| P                                         | -3.32935700 | -3.43704700 | 3.62537600  | H | -7.65990100 | -4.48033100 | -0.02169300 |

|    |             |             |             |                          |                  |             |             |
|----|-------------|-------------|-------------|--------------------------|------------------|-------------|-------------|
| C  | -2.49277600 | -5.09347300 | 3.72109000  | SCF energy in solution:  | -2964.1371144900 |             |             |
| C  | -2.34528200 | -5.95281000 | 2.61955400  | Free energy in solution: | -2963.5034284900 |             |             |
| C  | -1.96560800 | -5.49377900 | 4.95860100  | P                        | 5.32439300       | 0.39181500  | -1.60019500 |
| C  | -1.68434900 | -7.17403100 | 2.75211400  | C                        | 1.03235500       | -1.51749300 | -0.12291000 |
| H  | -2.76174600 | -5.66874700 | 1.65668700  | H                        | 1.49342000       | -0.79548200 | 0.55991200  |
| C  | -1.29729000 | -6.71397700 | 5.09210000  | H                        | 1.43372800       | -2.51037700 | 0.11704600  |
| H  | -2.08541900 | -4.84655000 | 5.82421800  | C                        | 3.49215900       | 0.23683500  | -1.22516000 |
| C  | -1.15683800 | -7.55658300 | 3.98901200  | H                        | 3.32956300       | 0.26099600  | -0.14088700 |
| H  | -1.58275000 | -7.82999400 | 1.89102100  | H                        | 3.00191900       | 1.12467500  | -1.64430000 |
| H  | -0.89504300 | -7.00769900 | 6.05829300  | C                        | 1.36129400       | -1.16360900 | -1.58278600 |
| H  | -0.64424300 | -8.50954100 | 4.09175200  | H                        | 0.85786100       | -0.22778800 | -1.86100100 |
| O  | -1.50937600 | 0.53085000  | -0.50024100 | H                        | 0.95314500       | -1.94297400 | -2.23734000 |
| C  | -0.91978500 | 1.49112700  | -1.00702300 | C                        | 2.87323400       | -1.02309300 | -1.84971100 |
| C  | -1.60574900 | 2.64057800  | -1.61787900 | H                        | 3.39319100       | -1.91852100 | -1.48325300 |
| C  | -0.87415700 | 3.73368600  | -2.10526200 | H                        | 3.03284900       | -0.99759600 | -2.93530300 |
| C  | -3.01236500 | 2.63975800  | -1.69966000 | P                        | -0.79079100      | -1.50133500 | 0.24549400  |
| C  | -1.54708400 | 4.81731200  | -2.66988400 | C                        | -1.43416500      | -2.85745100 | -0.81410500 |
| H  | 0.20714100  | 3.72061300  | -2.04428400 | C                        | -1.15458500      | -4.19522100 | -0.49058000 |
| C  | -3.67465500 | 3.72188500  | -2.26714500 | C                        | -2.14075700      | -2.56625000 | -1.98866600 |
| H  | -3.56159600 | 1.78654000  | -1.31399700 | C                        | -1.57038900      | -5.22413000 | -1.33444200 |
| C  | -2.94109100 | 4.81193700  | -2.75207700 | H                        | -0.62317100      | -4.43507300 | 0.42637200  |
| H  | -0.98268300 | 5.66535200  | -3.04717600 | C                        | -2.55171900      | -3.60085700 | -2.83215900 |
| H  | -4.75923900 | 3.72286400  | -2.33231400 | H                        | -2.40033900      | -1.54071300 | -2.23070100 |
| H  | -3.46085800 | 5.65792700  | -3.19448200 | C                        | -2.26765300      | -4.92774200 | -2.50849900 |
| Pd | 0.80565400  | 0.65488300  | -0.51178400 | H                        | -1.35476700      | -6.25652900 | -1.07255200 |
| P  | 2.48241600  | 1.97797000  | -1.27273400 | H                        | -3.10556300      | -3.36609600 | -3.73712600 |
| C  | 2.34049400  | 1.76932100  | -3.92250400 | H                        | -2.59485400      | -5.73075200 | -3.16360900 |
| H  | 3.37110200  | 1.39711700  | -3.92936900 | C                        | -0.94205800      | -2.11718400 | 1.97038600  |
| H  | 1.66491800  | 0.90359200  | -3.85767800 | C                        | 0.17561600       | -2.35075600 | 2.78691800  |
| C  | 3.43983700  | 4.35087500  | -0.54744600 | C                        | -2.23440200      | -2.32185300 | 2.48960500  |
| H  | 4.40179000  | 3.84893600  | -0.40066900 | C                        | 0.00680800       | -2.78862100 | 4.10273000  |
| H  | 3.41894600  | 4.76415300  | -1.56279900 | H                        | 1.18155500       | -2.19765400 | 2.41017400  |
| O  | 3.86553300  | 1.38166700  | -1.25794800 | C                        | -2.39027600      | -2.76385400 | 3.80352300  |
| O  | 2.37541800  | 3.37905000  | -0.41884700 | H                        | -3.10948500      | -2.12272000 | 1.87123800  |
| O  | 2.14845400  | 2.61049300  | -2.77374700 | C                        | -1.27504000      | -2.99723100 | 4.61248900  |
| C  | 2.03996100  | 2.58821400  | -5.16719500 | H                        | 0.87974500       | -2.96767800 | 4.72486900  |
| H  | 1.00778600  | 2.95402500  | -5.15149200 | H                        | -3.39134100      | -2.92174500 | 4.19580400  |
| H  | 2.17667700  | 1.97454100  | -6.06514700 | H                        | -1.40439600      | -3.33872000 | 5.63619400  |
| H  | 2.71102300  | 3.45122800  | -5.23236000 | C                        | 5.77575500       | 1.93617900  | -0.68198600 |
| C  | 3.21388200  | 5.43558900  | 0.49123800  | C                        | 7.13139800       | 2.31369800  | -0.69312800 |
| H  | 3.99842500  | 6.19780900  | 0.41677400  | C                        | 4.85590900       | 2.78214900  | -0.04207900 |
| H  | 3.23564600  | 5.01425600  | 1.50186400  | C                        | 7.55718600       | 3.48430900  | -0.06896700 |
| H  | 2.24355500  | 5.92125600  | 0.34327500  | H                        | 7.86004700       | 1.68107900  | -1.19544600 |
|    |             |             |             | C                        | 5.28203800       | 3.96343900  | 0.57349500  |
|    |             |             |             | H                        | 3.79948000       | 2.53436600  | -0.01463800 |
|    |             |             |             | C                        | 6.63093600       | 4.31648400  | 0.56624100  |

TS8a

SCF energy: -2964.984280

|    |             |             |             |                          |                  |             |             |
|----|-------------|-------------|-------------|--------------------------|------------------|-------------|-------------|
| H  | 8.61066800  | 3.75193200  | -0.08463700 |                          |                  |             |             |
| H  | 4.55242800  | 4.60458100  | 1.06168600  |                          |                  |             |             |
| H  | 6.95950100  | 5.23432400  | 1.04664700  |                          |                  |             |             |
| C  | 5.99949800  | -0.92295400 | -0.47350400 |                          |                  |             |             |
| C  | 6.03213900  | -0.80712400 | 0.92627400  |                          |                  |             |             |
| C  | 6.48290200  | -2.10319600 | -1.05939600 |                          |                  |             |             |
| C  | 6.52747600  | -1.84540900 | 1.71543600  |                          |                  |             |             |
| H  | 5.67978100  | 0.10574600  | 1.39942000  |                          |                  |             |             |
| C  | 6.97263600  | -3.14742300 | -0.27020200 |                          |                  |             |             |
| H  | 6.48105600  | -2.20089800 | -2.14248100 |                          |                  |             |             |
| C  | 6.99650300  | -3.01954300 | 1.11893600  |                          |                  |             |             |
| H  | 6.55077200  | -1.73805800 | 2.79714200  |                          |                  |             |             |
| H  | 7.34252000  | -4.05442100 | -0.74154200 |                          |                  |             |             |
| H  | 7.38438100  | -3.82669300 | 1.73497700  |                          |                  |             |             |
| O  | 0.86343200  | 2.38811100  | 0.27756300  |                          |                  |             |             |
| C  | -0.19284000 | 1.87978400  | 0.20619200  |                          |                  |             |             |
| C  | -1.72596900 | 2.88513000  | 0.11453600  |                          |                  |             |             |
| C  | -2.00653100 | 3.51520700  | -1.10798000 |                          |                  |             |             |
| C  | -2.13473600 | 3.48127000  | 1.31846900  |                          |                  |             |             |
| C  | -2.70653300 | 4.72119200  | -1.12515200 |                          |                  |             |             |
| H  | -1.68058700 | 3.06277400  | -2.04077500 |                          |                  |             |             |
| C  | -2.83210600 | 4.68884200  | 1.29666800  |                          |                  |             |             |
| H  | -1.90146000 | 3.00539300  | 2.26761200  |                          |                  |             |             |
| C  | -3.11844600 | 5.30653400  | 0.07545900  |                          |                  |             |             |
| H  | -2.93051700 | 5.20451600  | -2.07228500 |                          |                  |             |             |
| H  | -3.14877300 | 5.14983800  | 2.22850800  |                          |                  |             |             |
| H  | -3.65872700 | 6.24931500  | 0.05981000  |                          |                  |             |             |
| Pd | -1.67445900 | 0.65663900  | 0.07469600  |                          |                  |             |             |
| P  | -3.96931700 | 0.04539100  | -0.13867100 |                          |                  |             |             |
| C  | -5.46016100 | 1.39710000  | 1.62421400  |                          |                  |             |             |
| H  | -5.91384100 | 0.43643300  | 1.89167700  |                          |                  |             |             |
| H  | -4.63640300 | 1.58830900  | 2.32920800  |                          |                  |             |             |
| C  | -5.56080300 | -0.18976400 | -2.27466700 |                          |                  |             |             |
| H  | -5.87850500 | -1.16416500 | -1.88616400 |                          |                  |             |             |
| H  | -6.26200000 | 0.57039500  | -1.91177700 |                          |                  |             |             |
| O  | -4.49430300 | -1.22252000 | 0.49585300  |                          |                  |             |             |
| O  | -4.24314600 | 0.11243300  | -1.77263600 |                          |                  |             |             |
| O  | -4.94945800 | 1.33158900  | 0.28797800  |                          |                  |             |             |
| C  | -6.47676100 | 2.52606200  | 1.68953300  |                          |                  |             |             |
| H  | -6.01052800 | 3.48013400  | 1.42149700  |                          |                  |             |             |
| H  | -6.88896600 | 2.61035900  | 2.70230700  |                          |                  |             |             |
| H  | -7.30215100 | 2.34059300  | 0.99393000  |                          |                  |             |             |
| C  | -5.50324000 | -0.19507700 | -3.79317500 |                          |                  |             |             |
| H  | -6.49393900 | -0.41271700 | -4.20975900 |                          |                  |             |             |
| H  | -4.80391600 | -0.95746900 | -4.15422500 |                          |                  |             |             |
| H  | -5.17474100 | 0.77846400  | -4.17281600 |                          |                  |             |             |
|    |             |             |             | <b>11a</b>               |                  |             |             |
|    |             |             |             | SCF energy:              | -2965.005092     |             |             |
|    |             |             |             | SCF energy in solution:  | -2964.1569805700 |             |             |
|    |             |             |             | Free energy in solution: | -2963.5240005700 |             |             |
|    |             |             |             | P                        | 5.33906600       | 0.49382800  | -1.62475100 |
|    |             |             |             | C                        | 1.07116100       | -1.45694000 | -0.12628900 |
|    |             |             |             | H                        | 1.54422900       | -0.76196900 | 0.57751300  |
|    |             |             |             | H                        | 1.49424700       | -2.45171900 | 0.06166500  |
|    |             |             |             | C                        | 3.51017900       | 0.35109100  | -1.22085500 |
|    |             |             |             | H                        | 3.36751300       | 0.33838500  | -0.13307300 |
|    |             |             |             | H                        | 3.02526400       | 1.25822900  | -1.60514000 |
|    |             |             |             | C                        | 1.36440200       | -1.03529100 | -1.57605700 |
|    |             |             |             | H                        | 0.85093600       | -0.09043700 | -1.80434700 |
|    |             |             |             | H                        | 0.94070300       | -1.78532200 | -2.25411100 |
|    |             |             |             | C                        | 2.86904300       | -0.88268400 | -1.87571100 |
|    |             |             |             | H                        | 3.39559800       | -1.79184400 | -1.55564400 |
|    |             |             |             | H                        | 3.00270400       | -0.81599600 | -2.96283200 |
|    |             |             |             | P                        | -0.75087900      | -1.48405300 | 0.27902100  |
|    |             |             |             | C                        | -1.35120100      | -2.86209100 | -0.78095000 |
|    |             |             |             | C                        | -1.16806100      | -4.19967900 | -0.39822300 |
|    |             |             |             | C                        | -1.92443700      | -2.57723800 | -2.02822300 |
|    |             |             |             | C                        | -1.54997100      | -5.23438400 | -1.25246900 |
|    |             |             |             | H                        | -0.73803800      | -4.43509900 | 0.57102800  |
|    |             |             |             | C                        | -2.29854100      | -3.61609100 | -2.88270400 |
|    |             |             |             | H                        | -2.10819000      | -1.54804400 | -2.31866000 |
|    |             |             |             | C                        | -2.11311400      | -4.94452100 | -2.49723200 |
|    |             |             |             | H                        | -1.41045300      | -6.26680500 | -0.94316200 |
|    |             |             |             | H                        | -2.74578900      | -3.38453200 | -3.84575700 |
|    |             |             |             | H                        | -2.41205900      | -5.75179000 | -3.16054700 |
|    |             |             |             | C                        | -0.83146100      | -2.12523900 | 2.00171200  |
|    |             |             |             | C                        | 0.31428500       | -2.35031700 | 2.78122600  |
|    |             |             |             | C                        | -2.10204300      | -2.34943300 | 2.56563400  |
|    |             |             |             | C                        | 0.19498000       | -2.79409400 | 4.10075500  |
|    |             |             |             | H                        | 1.30603700       | -2.18866800 | 2.37207000  |
|    |             |             |             | C                        | -2.20988200      | -2.79883400 | 3.88169900  |
|    |             |             |             | H                        | -2.99461700      | -2.16507500 | 1.97064800  |
|    |             |             |             | C                        | -1.06587700      | -3.02011100 | 4.65299700  |
|    |             |             |             | H                        | 1.09056100       | -2.96538600 | 4.69218200  |
|    |             |             |             | H                        | -3.19518600      | -2.97253100 | 4.30607700  |
|    |             |             |             | H                        | -1.15674900      | -3.36632900 | 5.67920000  |
|    |             |             |             | C                        | 5.82203600       | 2.03252300  | -0.71348500 |
|    |             |             |             | C                        | 7.16258800       | 2.44415800  | -0.82897200 |
|    |             |             |             | C                        | 4.94254900       | 2.83794400  | 0.02711000  |
|    |             |             |             | C                        | 7.61396800       | 3.60740800  | -0.20856100 |

|    |             |             |             |                                           |             |             |             |
|----|-------------|-------------|-------------|-------------------------------------------|-------------|-------------|-------------|
| H  | 7.85845000  | 1.84525200  | -1.41250600 | C                                         | -5.04110800 | -0.30437100 | -3.99112700 |
| C  | 5.39188800  | 4.01204400  | 0.63917200  | H                                         | -5.94103100 | -0.66182400 | -4.50522800 |
| H  | 3.89830900  | 2.56202600  | 0.13536400  | H                                         | -4.18583300 | -0.88765400 | -4.34995900 |
| C  | 6.72721600  | 4.39814600  | 0.52755100  | H                                         | -4.87999500 | 0.74390900  | -4.26348900 |
| H  | 8.65554900  | 3.90228300  | -0.30671000 |                                           |             |             |             |
| H  | 4.69301100  | 4.62217100  | 1.20573600  |                                           |             |             |             |
| H  | 7.07463700  | 5.31063000  | 1.00469300  | <b>12a</b>                                |             |             |             |
| C  | 6.01874800  | -0.83089600 | -0.51283600 | SCF energy: -2965.003400                  |             |             |             |
| C  | 6.09263400  | -0.71279500 | 0.88506900  | SCF energy in solution: -2964.1567048400  |             |             |             |
| C  | 6.46510600  | -2.02053100 | -1.10928900 | Free energy in solution: -2963.5232038400 |             |             |             |
| C  | 6.59104200  | -1.75828500 | 1.66272800  | P                                         | -4.18866800 | 0.19706100  | 0.08531300  |
| H  | 5.77070600  | 0.20722900  | 1.36592400  | C                                         | -0.78617000 | -2.11881200 | -0.34340600 |
| C  | 6.95734500  | -3.07189600 | -0.33131300 | H                                         | -1.25540500 | -1.64070900 | -1.21142100 |
| H  | 6.43311000  | -2.12005800 | -2.19172700 | H                                         | -0.89688700 | -3.20469100 | -0.46217300 |
| C  | 7.02195700  | -2.94184300 | 1.05635700  | C                                         | -3.92112900 | -1.66431700 | 0.04536200  |
| H  | 6.64686400  | -1.64893700 | 2.74301400  | H                                         | -4.87477000 | -2.18673500 | 0.19184400  |
| H  | 7.29789700  | -3.98617000 | -0.81053100 | H                                         | -3.56982300 | -1.91823000 | -0.96299200 |
| H  | 7.41236600  | -3.75456000 | 1.66333500  | C                                         | -1.46723600 | -1.65931500 | 0.95687000  |
| O  | 0.91914700  | 2.34689000  | 0.79137200  | H                                         | -1.43722900 | -0.56430100 | 1.01683600  |
| C  | -0.00551300 | 1.70929400  | 0.57319600  | H                                         | -0.89586100 | -2.03450000 | 1.81426400  |
| C  | -2.51304000 | 2.69809500  | 0.15022900  | C                                         | -2.91739200 | -2.15747200 | 1.10417300  |
| C  | -2.76956800 | 3.34085900  | -1.06826500 | H                                         | -2.91341000 | -3.25670000 | 1.08715500  |
| C  | -2.75152800 | 3.39492600  | 1.34334900  | H                                         | -3.28114700 | -1.87265700 | 2.09964400  |
| C  | -3.26885700 | 4.64716800  | -1.09178200 | P                                         | 1.03398700  | -1.70061400 | -0.39087800 |
| H  | -2.60624500 | 2.81858900  | -2.00728200 | C                                         | 1.68941000  | -2.81466500 | 0.92036200  |
| C  | -3.25900500 | 4.69950400  | 1.31880200  | C                                         | 1.87273400  | -4.18321400 | 0.66926100  |
| H  | -2.55055800 | 2.92553400  | 2.30411800  | C                                         | 1.92995500  | -2.31595300 | 2.20825200  |
| C  | -3.51902400 | 5.32940100  | 0.10069200  | C                                         | 2.28600600  | -5.03818300 | 1.69106100  |
| H  | -3.46858300 | 5.12807300  | -2.04689200 | H                                         | 1.70462400  | -4.58070900 | -0.32754000 |
| H  | -3.44379000 | 5.22238600  | 2.25477600  | C                                         | 2.33681400  | -3.17676400 | 3.22974000  |
| H  | -3.90995500 | 6.34351700  | 0.08055100  | H                                         | 1.83198900  | -1.25381900 | 2.40710800  |
| Pd | -1.70626400 | 0.78020400  | 0.18540800  | C                                         | 2.51619800  | -4.53685700 | 2.97412100  |
| P  | -3.88911400 | 0.01059800  | -0.21428500 | H                                         | 2.43193300  | -6.09485700 | 1.48302100  |
| C  | -5.63998900 | 1.14999300  | 1.43781700  | H                                         | 2.52480400  | -2.77893700 | 4.22352000  |
| H  | -5.97792900 | 0.15287300  | 1.74110500  | H                                         | 2.84065200  | -5.20328400 | 3.76893100  |
| H  | -4.85681700 | 1.47574500  | 2.13598300  | C                                         | 1.63978100  | -2.42649900 | -1.96930000 |
| C  | -5.20596800 | -0.45021200 | -2.48825300 | C                                         | 0.78491300  | -2.99724800 | -2.92500200 |
| H  | -5.36057400 | -1.49697600 | -2.20302800 | C                                         | 3.02059400  | -2.35608900 | -2.23507000 |
| H  | -6.05639700 | 0.13737500  | -2.12714500 | C                                         | 1.29928500  | -3.49363900 | -4.12579000 |
| O  | -4.20746400 | -1.32640800 | 0.40800400  | H                                         | -0.28319700 | -3.06499100 | -2.74510800 |
| O  | -3.99976500 | 0.03544600  | -1.85531800 | C                                         | 3.52490100  | -2.86048400 | -3.43363200 |
| O  | -5.09846200 | 1.08407500  | 0.10902900  | H                                         | 3.68578900  | -1.90418100 | -1.50119900 |
| C  | -6.78426000 | 2.14975800  | 1.42780800  | C                                         | 2.66894800  | -3.42764300 | -4.38166800 |
| H  | -6.42414100 | 3.14098200  | 1.13445800  | H                                         | 0.62627300  | -3.93367900 | -4.85699500 |
| H  | -7.23211900 | 2.22096500  | 2.42608100  | H                                         | 4.59285200  | -2.80569000 | -3.62754400 |
| H  | -7.56133800 | 1.83936200  | 0.72119200  | H                                         | 3.06761600  | -3.81521400 | -5.31552600 |

|    |             |             |             |                                           |             |             |             |
|----|-------------|-------------|-------------|-------------------------------------------|-------------|-------------|-------------|
| C  | -5.46826000 | 0.43459100  | -1.23229000 | C                                         | 6.16576000  | 3.24139800  | -0.74046100 |
| C  | -5.81558700 | 1.76207500  | -1.54272700 | H                                         | 5.50943500  | 4.11562100  | -0.68366700 |
| C  | -6.07199700 | -0.59738600 | -1.96807200 | H                                         | 6.81105200  | 3.34389200  | -1.62100300 |
| C  | -6.74954400 | 2.04765500  | -2.53701800 | H                                         | 6.79937100  | 3.22400100  | 0.15277000  |
| H  | -5.34480300 | 2.57894900  | -1.00037700 | C                                         | 3.82798500  | 0.86104500  | 4.48401300  |
| C  | -6.99909900 | -0.31171900 | -2.97460900 | H                                         | 4.64337100  | 0.80746000  | 5.21496800  |
| H  | -5.82558400 | -1.63485800 | -1.76480200 | H                                         | 3.09052900  | 0.09040200  | 4.73467800  |
| C  | -7.34381500 | 1.00938400  | -3.25928700 | H                                         | 3.34544700  | 1.83983100  | 4.57491200  |
| H  | -7.00596800 | 3.08093600  | -2.75583400 |                                           |             |             |             |
| H  | -7.45288600 | -1.12615600 | -3.53383000 |                                           |             |             |             |
| H  | -8.06506300 | 1.23012400  | -4.04163000 | <b>TS9a</b>                               |             |             |             |
| C  | -5.19489500 | 0.34936600  | 1.63791800  | SCF energy: -2964.990588                  |             |             |             |
| C  | -6.51618600 | -0.11240300 | 1.75790700  | SCF energy in solution: -2964.163816      |             |             |             |
| C  | -4.58922000 | 0.94806000  | 2.75350700  | Free energy in solution: -2963.5223010600 |             |             |             |
| C  | -7.20749300 | 0.01456500  | 2.96260700  | P                                         | -1.90494600 | -1.27526500 | -0.94834800 |
| H  | -7.01126400 | -0.56149600 | 0.90083800  | C                                         | 1.51110300  | -2.14567000 | -2.04491200 |
| C  | -5.27792100 | 1.06958700  | 3.96339600  | H                                         | 0.92306300  | -1.70573500 | -2.85739900 |
| H  | -3.57388700 | 1.32891100  | 2.67062700  | H                                         | 2.39488200  | -2.60399200 | -2.50203400 |
| C  | -6.58849600 | 0.60331200  | 4.06921100  | C                                         | -1.58696200 | -2.53132200 | -2.32042700 |
| H  | -8.23113400 | -0.34359600 | 3.03865400  | H                                         | -2.54097200 | -2.96527500 | -2.64115900 |
| H  | -4.79291200 | 1.53507300  | 4.81746600  | H                                         | -1.21329400 | -1.95312300 | -3.17370200 |
| H  | -7.12925100 | 0.70285100  | 5.00674500  | C                                         | 0.68895300  | -3.20275100 | -1.26759000 |
| O  | -1.13708700 | 1.48632400  | -2.04358200 | H                                         | 0.41111500  | -2.81928300 | -0.27870700 |
| C  | -0.25184900 | 1.14446400  | -1.40776300 | H                                         | 1.32028400  | -4.07630300 | -1.07251500 |
| C  | 1.74228300  | 2.77880700  | -0.47133800 | C                                         | -0.59841600 | -3.65841900 | -1.97218300 |
| C  | 1.54441100  | 3.54804400  | 0.68335100  | H                                         | -0.35020900 | -4.19382900 | -2.89943200 |
| C  | 2.09096600  | 3.43070500  | -1.66256000 | H                                         | -1.10114300 | -4.38421500 | -1.32153100 |
| C  | 1.70210600  | 4.93728000  | 0.64879100  | P                                         | 2.04355200  | -0.74605100 | -0.93095000 |
| H  | 1.29072300  | 3.06553000  | 1.62354400  | C                                         | 3.11500000  | -1.66652300 | 0.25742800  |
| C  | 2.25684700  | 4.82058300  | -1.69451300 | C                                         | 4.36907000  | -2.14724900 | -0.15123300 |
| H  | 2.24063100  | 2.86129900  | -2.57739100 | C                                         | 2.65582300  | -1.97065100 | 1.54522800  |
| C  | 2.06191300  | 5.57822600  | -0.53867100 | C                                         | 5.14443200  | -2.92327300 | 0.71032900  |
| H  | 1.54952700  | 5.51745400  | 1.55635100  | H                                         | 4.74866300  | -1.90694500 | -1.14044300 |
| H  | 2.53128900  | 5.30794100  | -2.62769900 | C                                         | 3.43113800  | -2.75377800 | 2.40303200  |
| H  | 2.18660700  | 6.65785900  | -0.56323200 | H                                         | 1.70851200  | -1.57223700 | 1.89101500  |
| Pd | 1.41829200  | 0.72673500  | -0.42094400 | C                                         | 4.67504100  | -3.23126400 | 1.98915600  |
| P  | 3.55054100  | 0.56156800  | 0.54239300  | H                                         | 6.11636600  | -3.28339200 | 0.38322300  |
| C  | 5.34405900  | 1.96696700  | -0.83921000 | H                                         | 3.06551600  | -2.97867700 | 3.40164400  |
| H  | 5.98232700  | 1.07913300  | -0.90993000 | H                                         | 5.28015800  | -3.83408300 | 2.66126900  |
| H  | 4.70069600  | 1.99920800  | -1.72918900 | C                                         | 3.24131400  | 0.22169000  | -1.94342900 |
| C  | 4.37122500  | 0.65900200  | 3.07983900  | C                                         | 3.42505300  | -0.00262700 | -3.31664900 |
| H  | 4.84686000  | -0.32257600 | 2.97259200  | C                                         | 3.95785100  | 1.25781000  | -1.31592000 |
| H  | 5.10665500  | 1.43016000  | 2.82844700  | C                                         | 4.31285400  | 0.78850600  | -4.05106600 |
| O  | 4.29898600  | -0.70017200 | 0.18803500  | H                                         | 2.88313200  | -0.79212200 | -3.82768200 |
| O  | 3.26519600  | 0.74857400  | 2.15316400  | C                                         | 4.84651600  | 2.03800300  | -2.05522200 |
| O  | 4.52981100  | 1.87367100  | 0.34001200  | H                                         | 3.80054800  | 1.44656600  | -0.25623600 |



|    |             |             |             |                          |                  |             |             |
|----|-------------|-------------|-------------|--------------------------|------------------|-------------|-------------|
| C  | 5.02683900  | 1.80807400  | -3.42195900 | H                        | 0.78592800       | 1.55100000  | 4.57980100  |
| H  | 4.44492100  | 0.60260700  | -5.11380700 | O                        | 2.67631100       | 1.35031000  | 1.57704700  |
| H  | 5.39789400  | 2.83283700  | -1.55967500 | O                        | 0.58650200       | 0.38879100  | 2.87206000  |
| H  | 5.71800700  | 2.42211300  | -3.99341000 | O                        | 0.66572900       | 2.80168100  | 2.29933700  |
| C  | -3.41035100 | -0.44870500 | -1.63002800 | C                        | 0.54382100       | 5.18097300  | 2.49209100  |
| C  | -4.50561400 | -0.12733800 | -0.81283800 | H                        | -0.54344300      | 5.16139700  | 2.36673900  |
| C  | -3.43680400 | -0.03421000 | -2.97326300 | H                        | 0.92495500       | 6.13407100  | 2.10650800  |
| C  | -5.60014000 | 0.56831000  | -1.32802500 | H                        | 0.77127000       | 5.12484700  | 3.56204700  |
| H  | -4.50436200 | -0.41729500 | 0.23220100  | C                        | 0.52407800       | -0.54135300 | 5.08560100  |
| C  | -4.53299100 | 0.65940100  | -3.48766900 | H                        | 0.87512300       | -0.42745700 | 6.11797700  |
| H  | -2.60010500 | -0.25019400 | -3.63167700 | H                        | 0.83916800       | -1.52673200 | 4.72368300  |
| C  | -5.62090300 | 0.96105600  | -2.66693400 | H                        | -0.57089500      | -0.50812700 | 5.08892700  |
| H  | -6.43692900 | 0.80613400  | -0.67666500 |                          |                  |             |             |
| H  | -4.53387700 | 0.96393900  | -4.53111000 |                          |                  |             |             |
| H  | -6.47435100 | 1.50227300  | -3.06633600 | <b>13a</b>               |                  |             |             |
| C  | -2.56491200 | -2.35711400 | 0.39873300  | SCF energy:              | -2851.685156     |             |             |
| C  | -3.64244400 | -3.24010400 | 0.20933000  | SCF energy in solution:  | -2850.8797931400 |             |             |
| C  | -1.93346700 | -2.32248200 | 1.65138700  | Free energy in solution: | -2850.2412871400 |             |             |
| C  | -4.07308800 | -4.06806400 | 1.24562500  | P                        | -1.82832600      | -1.45501200 | -0.13498600 |
| H  | -4.15631900 | -3.27339600 | -0.74785100 | C                        | 1.51657600       | -3.09250400 | -0.34694200 |
| C  | -2.36593300 | -3.15224800 | 2.69002400  | H                        | 0.98977500       | -3.35655800 | -1.26808700 |
| H  | -1.10486200 | -1.63862000 | 1.81783600  | H                        | 2.46083700       | -3.64659000 | -0.35773500 |
| C  | -3.43413400 | -4.02610200 | 2.48862000  | C                        | -1.54280600      | -3.27754500 | -0.50379700 |
| H  | -4.90822400 | -4.74494000 | 1.08466800  | H                        | -2.52727900      | -3.74835700 | -0.60640000 |
| H  | -1.86785100 | -3.10973200 | 3.65498400  | H                        | -1.07735600      | -3.32777900 | -1.49420500 |
| H  | -3.77173000 | -4.67112400 | 3.29559800  | C                        | 0.65797500       | -3.46563500 | 0.88446300  |
| O  | 0.22193400  | 2.22278300  | -3.02377200 | H                        | 0.50016600       | -2.58907900 | 1.52456300  |
| C  | 0.02433300  | 1.45427400  | -2.19576900 | H                        | 1.20013600       | -4.18600700 | 1.50711500  |
| C  | -1.46275800 | 1.86639800  | 0.41387100  | C                        | -0.71061000      | -4.06739100 | 0.52151900  |
| C  | -2.24879500 | 1.46067000  | 1.50401700  | H                        | -0.56583200      | -5.07725000 | 0.11255800  |
| C  | -1.79486000 | 3.07583900  | -0.21613600 | H                        | -1.29552900      | -4.18879500 | 1.44077600  |
| C  | -3.34100300 | 2.22174800  | 1.93208000  | P                        | 1.90805300       | -1.26411400 | -0.41417500 |
| H  | -1.99933400 | 0.55713300  | 2.04953300  | C                        | 3.23531100       | -1.20177700 | 0.86725400  |
| C  | -2.88558100 | 3.84101000  | 0.21429300  | C                        | 4.49524200       | -1.77256900 | 0.63002700  |
| H  | -1.20936800 | 3.44831800  | -1.05118000 | C                        | 2.96196900       | -0.65467100 | 2.12764200  |
| C  | -3.66645300 | 3.41698100  | 1.28920000  | C                        | 5.45993000       | -1.80070100 | 1.63682900  |
| H  | -3.92978600 | 1.88006300  | 2.78122800  | H                        | 4.72984000       | -2.18341600 | -0.34829500 |
| H  | -3.11954300 | 4.77169800  | -0.29857200 | C                        | 3.92628700       | -0.69203500 | 3.13732800  |
| H  | -4.51222700 | 4.01191400  | 1.62489300  | H                        | 2.00985100       | -0.16723900 | 2.31114900  |
| Pd | 0.09646300  | 0.66117000  | -0.26032200 | C                        | 5.17529800       | -1.26428100 | 2.89505800  |
| P  | 1.16889400  | 1.36295500  | 1.66719900  | H                        | 6.43493500       | -2.23779600 | 1.43738000  |
| C  | 1.18355400  | 4.02116400  | 1.74705200  | H                        | 3.70332900       | -0.25917000 | 4.10909500  |
| H  | 2.27506200  | 4.02918100  | 1.84807800  | H                        | 5.92784100       | -1.28526600 | 3.67900300  |
| H  | 0.93807400  | 4.07495200  | 0.67740700  | C                        | 2.80706900       | -1.09600500 | -2.02372500 |
| C  | 1.09293700  | 0.56573700  | 4.21418000  | C                        | 2.76631400       | -2.09197000 | -3.01433900 |
| H  | 2.18799500  | 0.53047600  | 4.19066000  | C                        | 3.52826100       | 0.08510600  | -2.28138900 |

|    |             |             |             |
|----|-------------|-------------|-------------|
| C  | 3.42772500  | -1.91466500 | -4.23221500 |
| H  | 2.23084500  | -3.02093000 | -2.85131100 |
| C  | 4.18954200  | 0.25195600  | -3.49853600 |
| H  | 3.55290800  | 0.86905700  | -1.52835700 |
| C  | 4.14184000  | -0.74239400 | -4.47814200 |
| H  | 3.38594800  | -2.69896100 | -4.98376900 |
| H  | 4.74399300  | 1.16910700  | -3.67998200 |
| H  | 4.65772000  | -0.60544100 | -5.42505500 |
| C  | -3.24000400 | -1.12440300 | -1.27719300 |
| C  | -4.35256300 | -0.37164400 | -0.87260500 |
| C  | -3.17620500 | -1.57051800 | -2.60783400 |
| C  | -5.38571500 | -0.09655800 | -1.76923200 |
| H  | -4.40663100 | 0.01737300  | 0.13841600  |
| C  | -4.20977300 | -1.29225600 | -3.50313000 |
| H  | -2.31732500 | -2.13540600 | -2.95948500 |
| C  | -5.32099100 | -0.55853900 | -3.08448600 |
| H  | -6.23769200 | 0.49054100  | -1.43763600 |
| H  | -4.14381600 | -1.64946600 | -4.52746000 |
| H  | -6.12624200 | -0.34157800 | -3.78116700 |
| C  | -2.58867300 | -1.56583200 | 1.54307600  |
| C  | -3.76611000 | -2.29740800 | 1.77363900  |
| C  | -1.93610100 | -0.97310600 | 2.63379600  |
| C  | -4.27844600 | -2.42795600 | 3.06428500  |
| H  | -4.29305400 | -2.75793000 | 0.94249400  |
| C  | -2.44768500 | -1.10824400 | 3.92688900  |
| H  | -1.03009900 | -0.39704000 | 2.46563400  |
| C  | -3.61901900 | -1.83410900 | 4.14400900  |
| H  | -5.19241600 | -2.99310000 | 3.22676300  |
| H  | -1.93203600 | -0.63969200 | 4.76074200  |
| H  | -4.01959300 | -1.93613100 | 5.14904700  |
| C  | -1.56211600 | 1.61591900  | -0.17017400 |
| C  | -2.18639200 | 2.14712400  | 0.96728600  |
| C  | -2.00137600 | 2.06060500  | -1.42869700 |
| C  | -3.22261200 | 3.08131800  | 0.85209100  |
| H  | -1.85326500 | 1.85638900  | 1.95886300  |
| C  | -3.02820500 | 3.00254300  | -1.54724600 |
| H  | -1.54314700 | 1.67049400  | -2.33524500 |
| C  | -3.64731100 | 3.51499300  | -0.40490600 |
| H  | -3.68902500 | 3.47828400  | 1.75179200  |
| H  | -3.34690500 | 3.32963800  | -2.53496800 |
| H  | -4.44710800 | 4.24639800  | -0.49359100 |
| Pd | -0.03333700 | 0.22281800  | -0.14471100 |
| P  | 1.32150000  | 2.06898100  | 0.34375600  |
| C  | 1.03888600  | 3.98796500  | -1.47242100 |
| H  | 2.12500500  | 4.01226500  | -1.62038500 |
| H  | 0.61091400  | 3.28057800  | -2.19707000 |

|   |             |            |             |
|---|-------------|------------|-------------|
| C | 1.81790500  | 3.24277700 | 2.68304400  |
| H | 2.88538800  | 3.08432200 | 2.49322900  |
| H | 1.54444000  | 4.23613000 | 2.31031200  |
| O | 2.79260600  | 1.97877400 | 0.01083100  |
| O | 1.05670200  | 2.24889100 | 1.96486300  |
| O | 0.74862800  | 3.54430200 | -0.14100100 |
| C | 0.42219500  | 5.36515800 | -1.65508700 |
| H | -0.66236400 | 5.31903300 | -1.51470900 |
| H | 0.63122000  | 5.74341000 | -2.66301300 |
| H | 0.83638900  | 6.07134000 | -0.92739900 |
| C | 1.49385200  | 3.10818200 | 4.16146500  |
| H | 2.04842300  | 3.85586100 | 4.74086400  |
| H | 1.76818500  | 2.11375900 | 4.53136800  |
| H | 0.42342600  | 3.25819600 | 4.33880100  |

**TS10a**

SCF energy: -2851.656285

SCF energy in solution: -2850.8563748300

Free energy in solution: -2850.2178168300

|   |             |             |             |
|---|-------------|-------------|-------------|
| P | 1.90737100  | -1.46451000 | -0.14560900 |
| C | -1.49447600 | -3.17750300 | -0.17944100 |
| H | -1.02868300 | -3.58705600 | 0.72390100  |
| H | -2.42289000 | -3.73643900 | -0.33569900 |
| C | 1.62642500  | -3.31629900 | 0.04586300  |
| H | 2.59739600  | -3.81903900 | 0.12784600  |
| H | 1.13463700  | -3.44038600 | 1.01811100  |
| C | -0.55350000 | -3.33588100 | -1.39719100 |
| H | -0.36783000 | -2.36108700 | -1.86381500 |
| H | -1.04679100 | -3.94379900 | -2.16460900 |
| C | 0.80051300  | -3.98891500 | -1.06596400 |
| H | 0.63399100  | -5.03412700 | -0.76828900 |
| H | 1.40158500  | -4.02363100 | -1.98293400 |
| P | -1.91723500 | -1.38688900 | 0.20773300  |
| C | -3.31207300 | -1.13029800 | -0.98706300 |
| C | -4.64792500 | -1.42004200 | -0.67079700 |
| C | -3.00800000 | -0.68527300 | -2.28352000 |
| C | -5.65268100 | -1.27806000 | -1.63020300 |
| H | -4.90803300 | -1.75345800 | 0.32917300  |
| C | -4.01091800 | -0.55886900 | -3.24661400 |
| H | -1.98667400 | -0.41225100 | -2.53014800 |
| C | -5.33693200 | -0.85362700 | -2.92203700 |
| H | -6.68344200 | -1.50031100 | -1.36572900 |
| H | -3.75695300 | -0.21710500 | -4.24695800 |
| H | -6.11955000 | -0.74551200 | -3.66853200 |
| C | -2.75958700 | -1.53261700 | 1.84855100  |

|    |             |             |             |                                         |             |             |             |
|----|-------------|-------------|-------------|-----------------------------------------|-------------|-------------|-------------|
| C  | -3.23234200 | -2.75294500 | 2.36296300  | H                                       | -1.00385300 | 4.75328300  | 1.65214000  |
| C  | -2.92148000 | -0.36559600 | 2.61611200  | H                                       | 0.71389300  | 4.68323600  | 1.20170500  |
| C  | -3.84874300 | -2.80780500 | 3.61497800  | C                                       | -2.67560800 | 2.91227700  | -1.80087000 |
| H  | -3.12991800 | -3.67048700 | 1.79235900  | H                                       | -3.54454300 | 2.28469600  | -2.02162400 |
| C  | -3.54616100 | -0.42666700 | 3.86386000  | H                                       | -2.96784800 | 3.66566600  | -1.06536600 |
| H  | -2.55759700 | 0.58923500  | 2.24127600  | O                                       | -1.78643100 | 2.36510300  | 1.46720800  |
| C  | -4.00778000 | -1.64361700 | 4.36862800  | O                                       | -1.68888400 | 2.01508000  | -1.22839000 |
| H  | -4.20579600 | -3.76080000 | 3.99754400  | O                                       | -0.60857900 | 3.91248600  | -0.19986600 |
| H  | -3.66428600 | 0.48513300  | 4.44361400  | C                                       | -0.39123900 | 6.25902300  | 0.21041100  |
| H  | -4.48746100 | -1.68656100 | 5.34328200  | H                                       | 0.30851800  | 6.36245700  | -0.62604100 |
| C  | 3.24651200  | -1.23413600 | 1.10947300  | H                                       | -0.14659700 | 7.01967700  | 0.96122500  |
| C  | 4.52214900  | -0.73588200 | 0.80822600  | H                                       | -1.40302100 | 6.45348400  | -0.16135100 |
| C  | 2.93659800  | -1.51100400 | 2.45326800  | C                                       | -2.13210000 | 3.56062600  | -3.06367900 |
| C  | 5.46920600  | -0.54629100 | 1.81757700  | H                                       | -2.90555200 | 4.18116100  | -3.53382200 |
| H  | 4.78121000  | -0.49005600 | -0.21610500 | H                                       | -1.82172900 | 2.79670900  | -3.78571300 |
| C  | 3.88511900  | -1.32915500 | 3.45880600  | H                                       | -1.27113200 | 4.19183700  | -2.82763800 |
| H  | 1.94210800  | -1.86049800 | 2.72093300  |                                         |             |             |             |
| C  | 5.15827100  | -0.84815800 | 3.14344800  |                                         |             |             |             |
| H  | 6.45325200  | -0.16100300 | 1.56248900  | <b>2b</b>                               |             |             |             |
| H  | 3.62645500  | -1.55677300 | 4.48976300  | SCF energy: -2638.860127                |             |             |             |
| H  | 5.89783100  | -0.70350300 | 3.92653500  | SCF energy in solution: -2638.01937771  |             |             |             |
| C  | 2.77102900  | -1.40696900 | -1.78049800 | Free energy in solution: -2637.40423771 |             |             |             |
| C  | 3.88416300  | -2.20819000 | -2.08970000 | P                                       | 0.63812500  | -1.75089000 | -0.06989900 |
| C  | 2.25041300  | -0.56953000 | -2.77835300 | C                                       | -3.00552600 | -1.63691300 | -1.80280400 |
| C  | 4.46269100  | -2.16480100 | -3.35843400 | H                                       | -3.78447800 | -2.30114100 | -1.40990400 |
| H  | 4.30918800  | -2.86377900 | -1.33416500 | H                                       | -3.43013600 | -1.13659700 | -2.68015600 |
| C  | 2.82764100  | -0.52621000 | -4.05020300 | C                                       | -0.64841900 | -3.11356000 | 0.03063300  |
| H  | 1.38399000  | 0.04578200  | -2.55013200 | H                                       | -0.20559700 | -3.99419800 | 0.51233900  |
| C  | 3.93534300  | -1.32260900 | -4.34156200 | H                                       | -1.43159100 | -2.74595500 | 0.70285800  |
| H  | 5.32407800  | -2.78940200 | -3.58068800 | C                                       | -1.79070600 | -2.46085100 | -2.26954700 |
| H  | 2.41045300  | 0.12884900  | -4.81055600 | H                                       | -0.98198100 | -1.77631000 | -2.54942600 |
| H  | 4.38642000  | -1.29059500 | -5.32983100 | H                                       | -2.08574500 | -2.97335300 | -3.19567100 |
| C  | 1.07668800  | 1.92514000  | 0.46739100  | C                                       | -1.25582700 | -3.54665000 | -1.31948300 |
| C  | 1.97224600  | 2.41267500  | -0.50939900 | H                                       | -2.06559400 | -4.25829600 | -1.10212500 |
| C  | 1.44742000  | 2.02355000  | 1.82411900  | H                                       | -0.49433900 | -4.11220800 | -1.86984300 |
| C  | 3.21297400  | 2.92557100  | -0.14270200 | P                                       | -2.63368400 | -0.25527900 | -0.57808300 |
| H  | 1.68436200  | 2.39923600  | -1.55651600 | C                                       | -3.79936700 | 1.07768600  | -1.12479200 |
| C  | 2.69762800  | 2.53477400  | 2.18741300  | C                                       | -3.36946300 | 2.40986600  | -1.02533400 |
| H  | 0.74401100  | 1.71413800  | 2.59179600  | C                                       | -5.08886100 | 0.81576200  | -1.61803200 |
| C  | 3.58276000  | 2.98324300  | 1.20788300  | C                                       | -4.21627100 | 3.45510200  | -1.40559200 |
| H  | 3.89473300  | 3.28780000  | -0.90875100 | H                                       | -2.36846900 | 2.62572500  | -0.66480500 |
| H  | 2.97235800  | 2.58803800  | 3.23776600  | C                                       | -5.92920800 | 1.86070600  | -2.00121400 |
| H  | 4.55012100  | 3.39021500  | 1.49044000  | H                                       | -5.44784400 | -0.20617900 | -1.70731700 |
| Pd | -0.00355900 | 0.07599400  | 0.11690600  | C                                       | -5.49439400 | 3.18452200  | -1.89388800 |
| P  | -0.95655700 | 2.32978300  | 0.21110700  | H                                       | -3.86755000 | 4.48136500  | -1.32586200 |
| C  | -0.29911600 | 4.86910600  | 0.82181600  | H                                       | -6.92353400 | 1.64157800  | -2.38226400 |

|   |             |             |             |                                         |             |             |             |
|---|-------------|-------------|-------------|-----------------------------------------|-------------|-------------|-------------|
| H | -6.14958800 | 3.99840400  | -2.19361600 | H                                       | 4.56455200  | 1.58593800  | -4.29442400 |
| C | -3.41372600 | -0.82549800 | 1.00975100  | C                                       | 3.15084800  | 3.92059000  | 2.44424900  |
| C | -4.63231800 | -1.52154300 | 1.06871800  | C                                       | 1.85253100  | 2.16493300  | 3.59807000  |
| C | -2.76117300 | -0.50933600 | 2.21269900  | C                                       | 3.25098600  | 2.74253100  | 3.40726100  |
| C | -5.18073400 | -1.89986200 | 2.29432500  | H                                       | 4.12619500  | 4.32551000  | 2.15724700  |
| H | -5.17083400 | -1.76692000 | 0.15776600  | H                                       | 1.20786500  | 2.89013600  | 4.11562500  |
| C | -3.31427800 | -0.88579100 | 3.44035400  | H                                       | 3.91827900  | 1.97298100  | 2.99892800  |
| H | -1.82013300 | 0.03251200  | 2.18749700  | N                                       | 1.65520300  | 2.38889300  | 1.11274700  |
| C | -4.52154600 | -1.58353700 | 3.48492700  | C                                       | 1.16644700  | 1.80162200  | 2.28827000  |
| H | -6.12487500 | -2.43814100 | 2.31947000  | C                                       | 2.43113700  | 3.58218500  | 1.14517100  |
| H | -2.79618900 | -0.62972100 | 4.36100200  | O                                       | 0.23081100  | 1.01786000  | 2.28693200  |
| H | -4.94988300 | -1.87783100 | 4.43960300  | O                                       | 2.52154500  | 4.29895600  | 0.17085900  |
| C | 1.58332000  | -1.99982300 | 1.49910400  | H                                       | 1.84857000  | 1.25288400  | 4.20193700  |
| C | 2.97398900  | -1.80237900 | 1.53576100  | H                                       | 3.67510000  | 3.05892500  | 4.36649100  |
| C | 0.91469100  | -2.27875000 | 2.70198000  | H                                       | 2.59776100  | 4.74783400  | 2.91141400  |
| C | 3.67569500  | -1.89102900 | 2.73918500  | Pd                                      | -0.32298200 | 0.35905800  | -0.30323500 |
| H | 3.51254200  | -1.58783400 | 0.61734400  |                                         |             |             |             |
| C | 1.61837300  | -2.37270600 | 3.90379300  |                                         |             |             |             |
| H | -0.16333500 | -2.40905300 | 2.71102800  | <b>TS1b</b>                             |             |             |             |
| C | 3.00106700  | -2.17894200 | 3.92804900  | SCF energy: -2638.837879                |             |             |             |
| H | 4.75304800  | -1.74463600 | 2.74492100  | SCF energy in solution: -2637.99578343  |             |             |             |
| H | 1.08274600  | -2.59640900 | 4.82292200  | Free energy in solution: -2637.38268143 |             |             |             |
| H | 3.54855300  | -2.25524100 | 4.86385900  | P                                       | 1.37115600  | -1.61399000 | -0.08586100 |
| C | 1.79318700  | -2.41688800 | -1.35120900 | C                                       | -2.36247400 | -2.85808000 | -1.13067000 |
| C | 2.37781300  | -3.69001400 | -1.22668700 | H                                       | -2.33324900 | -3.65351900 | -0.37627400 |
| C | 2.06457200  | -1.65651000 | -2.49635900 | H                                       | -3.30710800 | -2.96987200 | -1.67387400 |
| C | 3.20726300  | -4.19103100 | -2.22880800 | C                                       | 0.57508800  | -3.31562300 | -0.13777100 |
| H | 2.19155800  | -4.28870100 | -0.33869700 | H                                       | 1.33066100  | -4.03634600 | 0.19703400  |
| C | 2.89832700  | -2.15880000 | -3.50012200 | H                                       | -0.21609300 | -3.31896800 | 0.62046200  |
| H | 1.63160800  | -0.66592400 | -2.59752100 | C                                       | -1.15998100 | -2.99575800 | -2.09086000 |
| C | 3.46746200  | -3.42503300 | -3.36980000 | H                                       | -0.82354300 | -2.00769300 | -2.42895500 |
| H | 3.65176000  | -5.17712200 | -2.12027000 | H                                       | -1.48357600 | -3.52512900 | -2.99559400 |
| H | 3.10637900  | -1.54985700 | -4.37524500 | C                                       | 0.02038700  | -3.78333500 | -1.49541200 |
| H | 4.11595400  | -3.81540600 | -4.14994300 | H                                       | -0.30074900 | -4.82667400 | -1.36165900 |
| O | -0.13176300 | 2.48355100  | -0.43873600 | H                                       | 0.83603300  | -3.80883700 | -2.22743500 |
| C | 1.05701400  | 2.05121700  | -0.21512900 | P                                       | -2.38358700 | -1.20826900 | -0.23423800 |
| C | 2.05874300  | 1.92277500  | -1.31876000 | C                                       | -3.39996200 | -0.19201100 | -1.40541800 |
| C | 3.37141100  | 1.47138600  | -1.10498500 | C                                       | -2.74337800 | 0.69024900  | -2.27930800 |
| C | 1.66627000  | 2.25216200  | -2.62709700 | C                                       | -4.79805500 | -0.29983600 | -1.47557600 |
| C | 4.26464800  | 1.35080500  | -2.16789500 | C                                       | -3.47080300 | 1.43501800  | -3.21162900 |
| H | 3.69456600  | 1.21450000  | -0.09998400 | H                                       | -1.66322600 | 0.81016300  | -2.22629100 |
| C | 2.56040200  | 2.12581600  | -3.68867500 | C                                       | -5.52232500 | 0.45143700  | -2.40185400 |
| H | 0.65812200  | 2.61882100  | -2.78816100 | H                                       | -5.32673900 | -0.96426500 | -0.79769400 |
| C | 3.86521900  | 1.67472200  | -3.46719000 | C                                       | -4.85987400 | 1.31849400  | -3.27457500 |
| H | 5.27737500  | 1.00218300  | -1.98084000 | H                                       | -2.94623000 | 2.11217400  | -3.88053100 |
| H | 2.24095800  | 2.39476700  | -4.69270200 | H                                       | -6.60502800 | 0.36097300  | -2.43993200 |

|   |             |             |             |                                         |             |             |             |
|---|-------------|-------------|-------------|-----------------------------------------|-------------|-------------|-------------|
| H | -5.42545600 | 1.90345000  | -3.99528500 | H                                       | 5.83560000  | 2.55188100  | 1.69645900  |
| C | -3.51576700 | -1.51642500 | 1.19324400  | C                                       | -0.56443700 | 5.56342100  | 0.12013400  |
| C | -4.38130500 | -2.61999900 | 1.27990000  | C                                       | -2.05373000 | 3.93263200  | 1.26974700  |
| C | -3.47494300 | -0.60531000 | 2.26417500  | C                                       | -1.34145900 | 5.27893900  | 1.40575200  |
| C | -5.18562500 | -2.80834800 | 2.40637800  | H                                       | 0.03864100  | 6.47304000  | 0.18219800  |
| H | -4.43855600 | -3.34009300 | 0.46914200  | H                                       | -2.88181700 | 4.00909600  | 0.55011200  |
| C | -4.28507900 | -0.79354000 | 3.38472000  | H                                       | -0.64815200 | 5.24704000  | 2.25657200  |
| H | -2.81033500 | 0.25175900  | 2.20735200  | N                                       | 0.00326000  | 3.12326500  | 0.11361400  |
| C | -5.13985400 | -1.89550500 | 3.46101300  | C                                       | -1.12849500 | 2.83970100  | 0.75818400  |
| H | -5.84864600 | -3.66835000 | 2.45667900  | C                                       | 0.38521200  | 4.42039100  | -0.24685700 |
| H | -4.24254000 | -0.08020500 | 4.20387700  | O                                       | -1.47703800 | 1.64344400  | 0.95551000  |
| H | -5.76497000 | -2.04341100 | 4.33773500  | O                                       | 1.42167000  | 4.63278700  | -0.84932800 |
| C | 2.36674200  | -1.76952200 | 1.46399900  | H                                       | -2.49038600 | 3.58775000  | 2.21196900  |
| C | 3.68208600  | -1.28797900 | 1.54731700  | H                                       | -2.06406200 | 6.07618700  | 1.61297500  |
| C | 1.77755600  | -2.31505300 | 2.61886000  | H                                       | -1.26351000 | 5.69642500  | -0.71911600 |
| C | 4.39633200  | -1.37609100 | 2.74386600  | Pd                                      | -0.21936700 | 0.10714100  | 0.02191000  |
| H | 4.15329000  | -0.83707200 | 0.68026000  |                                         |             |             |             |
| C | 2.49296500  | -2.40086000 | 3.81285600  |                                         |             |             |             |
| H | 0.75212200  | -2.67285700 | 2.59549400  | <b>3b</b>                               |             |             |             |
| C | 3.80849600  | -1.93574900 | 3.87844000  | SCF energy: -2638.860572                |             |             |             |
| H | 5.41386500  | -0.99698000 | 2.78546500  | SCF energy in solution: -2638.01496003  |             |             |             |
| H | 2.02079700  | -2.83211000 | 4.69185300  | Free energy in solution: -2637.40327003 |             |             |             |
| H | 4.36698900  | -2.00404500 | 4.80822800  | P                                       | 1.68870200  | -0.82549200 | 1.23213400  |
| C | 2.61540600  | -1.79199500 | -1.44030900 | C                                       | -1.64965000 | -0.19817800 | 3.12784900  |
| C | 3.61383800  | -2.78166300 | -1.38893600 | H                                       | -1.01314200 | 0.49209600  | 3.69373800  |
| C | 2.50748100  | -0.99468900 | -2.58932200 | H                                       | -2.63786600 | -0.17778400 | 3.59908400  |
| C | 4.48459600  | -2.96695200 | -2.46177200 | C                                       | 1.42137000  | -0.76824900 | 3.08963400  |
| H | 3.71928400  | -3.40385300 | -0.50440800 | H                                       | 2.38993300  | -0.97683400 | 3.55837200  |
| C | 3.38177900  | -1.18564700 | -3.66412500 | H                                       | 1.18161600  | 0.27362800  | 3.33250000  |
| H | 1.76062100  | -0.20816200 | -2.63208500 | C                                       | -1.06139000 | -1.63011800 | 3.14669000  |
| C | 4.36833400  | -2.16921700 | -3.60405400 | H                                       | -1.08950900 | -2.07248700 | 2.14377600  |
| H | 5.25352400  | -3.73330000 | -2.40655000 | H                                       | -1.69559000 | -2.27466700 | 3.76619500  |
| H | 3.29040600  | -0.55622300 | -4.54536700 | C                                       | 0.37202500  | -1.71840000 | 3.69523100  |
| H | 5.04765300  | -2.31422800 | -4.44010000 | H                                       | 0.35170800  | -1.51485900 | 4.77547500  |
| O | 0.88702900  | 1.66950400  | -1.84259900 | H                                       | 0.72103800  | -2.75106000 | 3.58337300  |
| C | 1.05001500  | 1.65867500  | -0.62316300 | P                                       | -1.80860200 | 0.45896800  | 1.38389100  |
| C | 2.37094000  | 1.89984700  | 0.05443600  | C                                       | -3.39795800 | -0.33294600 | 0.87093200  |
| C | 2.48681200  | 1.99106400  | 1.44631600  | C                                       | -3.35551800 | -1.56098300 | 0.19233700  |
| C | 3.51624200  | 2.02749000  | -0.74207800 | C                                       | -4.64603800 | 0.22240700  | 1.19852300  |
| C | 3.72685600  | 2.23197100  | 2.03423400  | C                                       | -4.53861400 | -2.22627000 | -0.13903500 |
| H | 1.59918800  | 1.87695800  | 2.06211100  | H                                       | -2.40789100 | -1.98497100 | -0.11955600 |
| C | 4.75999400  | 2.25243600  | -0.15106300 | C                                       | -5.82536100 | -0.44197500 | 0.85988600  |
| H | 3.41099400  | 1.97865200  | -1.82019100 | H                                       | -4.69966500 | 1.17805400  | 1.71222400  |
| C | 4.86842400  | 2.36277800  | 1.23730500  | C                                       | -5.77410300 | -1.66954200 | 0.19380300  |
| H | 3.80526900  | 2.30964700  | 3.11554000  | H                                       | -4.48012100 | -3.16948900 | -0.67490500 |
| H | 5.64206000  | 2.36151100  | -0.77724400 | H                                       | -6.78465400 | 0.00180500  | 1.11413000  |

|   |             |             |             |                                       |             |             |             |
|---|-------------|-------------|-------------|---------------------------------------|-------------|-------------|-------------|
| H | -6.69456900 | -2.18351500 | -0.07124100 | H                                     | 3.64901400  | 5.34043600  | -2.47941900 |
| C | -2.23674600 | 2.23823600  | 1.61871500  | C                                     | -2.61961400 | -1.81661500 | -4.19343000 |
| C | -2.59720000 | 2.78860300  | 2.85972100  | C                                     | -2.25750000 | 0.61219000  | -3.74337300 |
| C | -2.17469400 | 3.08335000  | 0.49515300  | C                                     | -2.21039700 | -0.48043100 | -4.81627200 |
| C | -2.88857200 | 4.15004400  | 2.97668300  | H                                     | -2.46422500 | -2.66168500 | -4.87076100 |
| H | -2.65951400 | 2.16228200  | 3.74409000  | H                                     | -3.29857200 | 0.80779100  | -3.44531800 |
| C | -2.47349600 | 4.44113900  | 0.61640800  | H                                     | -1.18854000 | -0.55505300 | -5.21121600 |
| H | -1.89061600 | 2.67170000  | -0.46978100 | N                                     | -1.31573200 | -1.08682000 | -2.16111400 |
| C | -2.82823900 | 4.97900100  | 1.85571900  | C                                     | -1.48968600 | 0.17780500  | -2.50462100 |
| H | -3.16563600 | 4.55927100  | 3.94482900  | C                                     | -1.86983000 | -2.11870500 | -2.88991100 |
| H | -2.42185900 | 5.08054200  | -0.26099100 | O                                     | -1.01133600 | 1.11481200  | -1.77050900 |
| H | -3.05561400 | 6.03779200  | 1.94785000  | O                                     | -1.80475800 | -3.27915100 | -2.48377200 |
| C | 3.44719700  | -0.27451400 | 1.12584700  | H                                     | -1.84337900 | 1.56204100  | -4.09436800 |
| C | 4.35955200  | -0.91173500 | 0.27120100  | H                                     | -2.86113600 | -0.22300800 | -5.66029300 |
| C | 3.87510500  | 0.84346500  | 1.86116700  | H                                     | -3.69278800 | -1.80311200 | -3.94908800 |
| C | 5.67245100  | -0.44866800 | 0.16893900  | Pd                                    | 0.16628800  | 0.25523100  | -0.13534100 |
| H | 4.04344700  | -1.76475700 | -0.31952100 |                                       |             |             |             |
| C | 5.18857400  | 1.30177100  | 1.75852700  |                                       |             |             |             |
| H | 3.18386300  | 1.36756200  | 2.51585200  | <b>4b</b>                             |             |             |             |
| C | 6.09203600  | 0.65508800  | 0.91296800  | SCF energy: -2638.876035              |             |             |             |
| H | 6.36697800  | -0.95412200 | -0.49667000 | SCF energy in solution: -2638.037067  |             |             |             |
| H | 5.50329300  | 2.16629800  | 2.33697100  | Free energy in solution: -2637.423634 |             |             |             |
| H | 7.11481900  | 1.01282900  | 0.83117100  | P                                     | -1.78981300 | -1.13364500 | 0.31734000  |
| C | 1.71524600  | -2.61580900 | 0.82306500  | C                                     | 1.66719000  | -2.99732400 | 1.14094700  |
| C | 2.55747600  | -3.51523100 | 1.50200200  | H                                     | 1.95444200  | -3.90469800 | 0.59712000  |
| C | 0.84304400  | -3.09981600 | -0.16352100 | H                                     | 2.45762000  | -2.83122600 | 1.88032400  |
| C | 2.51668700  | -4.87591300 | 1.20092900  | C                                     | -1.40892600 | -2.92879100 | -0.05638000 |
| H | 3.25247600  | -3.15472700 | 2.25667900  | H                                     | -2.33232200 | -3.40034600 | -0.41313000 |
| C | 0.80258600  | -4.46549300 | -0.45818700 | H                                     | -0.70943300 | -2.93437200 | -0.89821500 |
| H | 0.19666700  | -2.42310000 | -0.71637100 | C                                     | 0.34502900  | -3.20042000 | 1.90077500  |
| C | 1.63643500  | -5.35211200 | 0.22240100  | H                                     | 0.06718100  | -2.25920300 | 2.38867000  |
| H | 3.17111600  | -5.56468800 | 1.72906400  | H                                     | 0.54747700  | -3.90831400 | 2.71613100  |
| H | 0.11133100  | -4.80783200 | -1.22235600 | C                                     | -0.85282800 | -3.75923700 | 1.11679400  |
| H | 1.60728400  | -6.41439600 | -0.00684400 | H                                     | -0.59009600 | -4.74964100 | 0.71771100  |
| O | 2.06102000  | -0.52629800 | -2.15310100 | H                                     | -1.66424800 | -3.92672500 | 1.83457700  |
| C | 1.67113200  | 0.41785000  | -1.50117300 | P                                     | 1.77149400  | -1.48539000 | 0.02829900  |
| C | 2.20022900  | 1.80774100  | -1.75071900 | C                                     | 3.54460700  | -1.02159000 | 0.26573800  |
| C | 1.80590300  | 2.90652200  | -0.97696000 | C                                     | 3.92484500  | -0.51860000 | 1.52260800  |
| C | 3.12496600  | 1.99350400  | -2.79107900 | C                                     | 4.51622900  | -1.15010500 | -0.73564000 |
| C | 2.32659000  | 4.17421300  | -1.23747300 | C                                     | 5.25354300  | -0.17495900 | 1.77384300  |
| H | 1.08549300  | 2.75966400  | -0.17607000 | H                                     | 3.17791700  | -0.37246000 | 2.29901300  |
| C | 3.64216700  | 3.25938200  | -3.05249600 | C                                     | 5.84387600  | -0.79515300 | -0.48297300 |
| H | 3.42160400  | 1.13101600  | -3.37954800 | H                                     | 4.24256100  | -1.52652200 | -1.71553600 |
| C | 3.24432000  | 4.35230800  | -2.27518500 | C                                     | 6.21740600  | -0.31154600 | 0.77109600  |
| H | 2.01391000  | 5.02236600  | -0.63399700 | H                                     | 5.53274600  | 0.20696100  | 2.75248900  |
| H | 4.35635300  | 3.39751400  | -3.86031200 | H                                     | 6.58570100  | -0.90180900 | -1.27018400 |

|   |             |             |             |                                      |             |             |             |
|---|-------------|-------------|-------------|--------------------------------------|-------------|-------------|-------------|
| H | 7.25131100  | -0.03909800 | 0.96607900  | H                                    | -2.50616500 | 5.00312300  | -3.57084100 |
| C | 1.71057000  | -2.07981700 | -1.72105600 | C                                    | 2.79287400  | 3.20781400  | 2.33056500  |
| C | 1.75782000  | -3.42749400 | -2.11026000 | C                                    | 3.19656700  | 3.46748300  | -0.10706100 |
| C | 1.59467100  | -1.09039800 | -2.71684100 | C                                    | 2.89171300  | 4.21859400  | 1.18888400  |
| C | 1.68037300  | -3.78266100 | -3.45940300 | H                                    | 2.44475800  | 3.65595200  | 3.26610200  |
| H | 1.85470200  | -4.21571800 | -1.37057600 | H                                    | 4.19690400  | 3.01286700  | -0.05308900 |
| C | 1.53115100  | -1.45050900 | -4.06416500 | H                                    | 1.94092300  | 4.75840800  | 1.08715500  |
| H | 1.57645300  | -0.04053600 | -2.43105100 | N                                    | 1.55418300  | 1.76653700  | 0.69742900  |
| C | 1.56643000  | -2.79569800 | -4.43942200 | C                                    | 2.19541700  | 2.34365100  | -0.36915600 |
| H | 1.71482100  | -4.83187900 | -3.74133300 | C                                    | 1.85529500  | 2.04401900  | 2.01117100  |
| H | 1.45148400  | -0.67435300 | -4.82071700 | O                                    | 1.99279100  | 1.95904300  | -1.52493300 |
| H | 1.50935300  | -3.07334900 | -5.48868000 | O                                    | 1.40443200  | 1.34945200  | 2.92551800  |
| C | -3.05927000 | -0.73729800 | -0.95789100 | H                                    | 3.18979900  | 4.11822900  | -0.98617600 |
| C | -4.13425600 | 0.11516100  | -0.66061800 | H                                    | 3.66395700  | 4.96860100  | 1.39703400  |
| C | -2.91830500 | -1.21753200 | -2.27016700 | H                                    | 3.78408400  | 2.77690700  | 2.53595000  |
| C | -5.05653300 | 0.46105400  | -1.64892800 | Pd                                   | 0.05395700  | 0.28076400  | 0.40232000  |
| H | -4.25336000 | 0.50926100  | 0.34394100  |                                      |             |             |             |
| C | -3.84248100 | -0.86897500 | -3.25583700 |                                      |             |             |             |
| H | -2.08295700 | -1.85964200 | -2.53431000 | <b>TS2b</b>                          |             |             |             |
| C | -4.91595600 | -0.03157300 | -2.94738600 | SCF energy: -2638.807260             |             |             |             |
| H | -5.88398000 | 1.12053000  | -1.40175700 | SCF energy in solution: -2637.971    |             |             |             |
| H | -3.72124400 | -1.25309300 | -4.26526400 | Free energy in solution: -2637.36167 |             |             |             |
| H | -5.63526700 | 0.23954200  | -3.71538100 | P                                    | 1.48358400  | -1.53221900 | -1.04714300 |
| C | -2.72574600 | -1.23039900 | 1.89910000  | C                                    | -1.62273400 | -0.49979600 | -3.03458700 |
| C | -3.92216300 | -1.96310100 | 1.99226900  | H                                    | -1.79237800 | -1.58187900 | -3.02771000 |
| C | -2.20610000 | -0.61392500 | 3.04762600  | H                                    | -2.41691100 | -0.06417300 | -3.64951100 |
| C | -4.58450900 | -2.07963000 | 3.21345100  | C                                    | 0.92642700  | -2.32323900 | -2.65367600 |
| H | -4.34368700 | -2.43507200 | 1.10840500  | H                                    | 1.67750500  | -3.06841800 | -2.94011500 |
| C | -2.87423400 | -0.73517000 | 4.26930700  | H                                    | 0.01109400  | -2.87821600 | -2.41715500 |
| H | -1.29652600 | -0.02464700 | 2.98448800  | C                                    | -0.22540200 | -0.16480000 | -3.61068400 |
| C | -4.05912500 | -1.46580700 | 4.35469800  | H                                    | 0.29514400  | 0.55883700  | -2.97264800 |
| H | -5.50951300 | -2.64701900 | 3.27450300  | H                                    | -0.35327600 | 0.34720800  | -4.57103200 |
| H | -2.46661000 | -0.24714100 | 5.15013900  | C                                    | 0.68804100  | -1.37791600 | -3.84701400 |
| H | -4.57744300 | -1.55505700 | 5.30591800  | H                                    | 0.27336300  | -1.99005700 | -4.66042900 |
| O | -1.68672600 | 2.14182600  | 1.72014400  | H                                    | 1.65604600  | -1.00768600 | -4.20219200 |
| C | -1.23791100 | 1.86138200  | 0.62633800  | P                                    | -1.84587300 | 0.13292600  | -1.29063800 |
| C | -1.55950500 | 2.72413200  | -0.56798500 | C                                    | -1.76326100 | 1.94904600  | -1.53561200 |
| C | -1.15561200 | 2.38590900  | -1.86454500 | C                                    | -0.75724400 | 2.68526800  | -0.89728400 |
| C | -2.31034200 | 3.89445400  | -0.36135700 | C                                    | -2.63387600 | 2.60022000  | -2.43096100 |
| C | -1.49905900 | 3.20317200  | -2.94241200 | C                                    | -0.59257600 | 4.04829500  | -1.17151500 |
| H | -0.56018300 | 1.49231400  | -2.01753400 | H                                    | -0.08205800 | 2.23254300  | -0.17599800 |
| C | -2.64689400 | 4.71182400  | -1.43611200 | C                                    | -2.48368300 | 3.96138100  | -2.68396600 |
| H | -2.61749300 | 4.13966200  | 0.65061000  | H                                    | -3.43210800 | 2.04893400  | -2.92202900 |
| C | -2.24275000 | 4.36529600  | -2.73056000 | C                                    | -1.45573000 | 4.68281900  | -2.06329600 |
| H | -1.17876000 | 2.93606600  | -3.94588300 | H                                    | 0.23207600  | 4.57393400  | -0.69432700 |
| H | -3.22402000 | 5.61818300  | -1.27016600 | H                                    | -3.16188500 | 4.45906200  | -3.37274600 |

|   |             |             |             |                                       |             |             |             |
|---|-------------|-------------|-------------|---------------------------------------|-------------|-------------|-------------|
| H | -1.33228700 | 5.74088500  | -2.28065000 | H                                     | -4.95977500 | -0.76866300 | 4.16614800  |
| C | -3.62495100 | -0.21946800 | -0.95847800 | C                                     | 2.82195500  | 4.49084800  | 2.75650900  |
| C | -4.21535100 | -1.42401100 | -1.37503300 | C                                     | 2.12572200  | 2.30882200  | 3.72767300  |
| C | -4.40042800 | 0.68997100  | -0.22218000 | C                                     | 3.27248700  | 3.31567300  | 3.62492900  |
| C | -5.55081400 | -1.70254800 | -1.08020400 | H                                     | 3.63228600  | 5.19326200  | 2.54000400  |
| H | -3.64001200 | -2.15439700 | -1.93715600 | H                                     | 1.31322600  | 2.73042600  | 4.33973400  |
| C | -5.73401400 | 0.40754800  | 0.07564200  | H                                     | 4.14377500  | 2.83130900  | 3.16229300  |
| H | -3.96393400 | 1.62653900  | 0.11057000  | N                                     | 1.62467300  | 2.80536900  | 1.31351400  |
| C | -6.31473600 | -0.78660500 | -0.35514600 | C                                     | 1.53724200  | 1.96335700  | 2.35321300  |
| H | -5.99336700 | -2.63514700 | -1.42055300 | C                                     | 2.23599500  | 4.02558900  | 1.41510000  |
| H | -6.31990900 | 1.12597800  | 0.64253000  | O                                     | 0.95121700  | 0.85280500  | 2.24851300  |
| H | -7.35520300 | -1.00217200 | -0.12755000 | O                                     | 2.31414500  | 4.78850700  | 0.44226000  |
| C | 2.43638100  | -2.89142900 | -0.24433200 | H                                     | 2.42795100  | 1.37437700  | 4.21059900  |
| C | 3.51447900  | -2.57741100 | 0.59808000  | H                                     | 3.58978800  | 3.65423500  | 4.61929900  |
| C | 2.05442300  | -4.23491900 | -0.38473900 | H                                     | 2.03985400  | 5.06143500  | 3.28087100  |
| C | 4.20194100  | -3.58702100 | 1.27195800  | Pd                                    | -0.34230700 | -0.86290300 | 0.35240800  |
| H | 3.81823900  | -1.54276600 | 0.72687600  |                                       |             |             |             |
| C | 2.74571000  | -5.24278300 | 0.28999400  |                                       |             |             |             |
| H | 1.21475800  | -4.50654100 | -1.01840800 | <b>TS3b</b>                           |             |             |             |
| C | 3.82198700  | -4.92174600 | 1.11855000  | SCF energy: -3364.965257              |             |             |             |
| H | 5.03541600  | -3.32748100 | 1.91881400  | SCF energy in solution: -3364.02827   |             |             |             |
| H | 2.44111600  | -6.27867400 | 0.16645100  | Free energy in solution: -3363.271954 |             |             |             |
| H | 4.35893000  | -5.70647700 | 1.64424900  | P                                     | -2.31444500 | -1.13925900 | -0.61104500 |
| C | 2.76605400  | -0.31998700 | -1.54614300 | C                                     | 0.64700000  | -3.79440400 | -1.17361500 |
| C | 3.81781000  | -0.69695700 | -2.40350300 | H                                     | 0.58160000  | -3.81056200 | -2.26717700 |
| C | 2.68800200  | 1.00190800  | -1.09206500 | H                                     | 1.41831500  | -4.52707600 | -0.91306500 |
| C | 4.75869600  | 0.24691900  | -2.80955300 | C                                     | -2.09359700 | -2.42590700 | -1.96032800 |
| H | 3.90828000  | -1.72512800 | -2.74594200 | H                                     | -2.97874300 | -2.37392000 | -2.60468100 |
| C | 3.63252700  | 1.94813200  | -1.50517800 | H                                     | -1.24418000 | -2.09454900 | -2.56691600 |
| H | 1.92299400  | 1.32119700  | -0.39109600 | C                                     | -0.71473400 | -4.17716600 | -0.56549100 |
| C | 4.66216200  | 1.57211700  | -2.36627900 | H                                     | -0.86258200 | -3.68758300 | 0.40463400  |
| H | 5.56784700  | -0.04990100 | -3.47196700 | H                                     | -0.72326200 | -5.25568000 | -0.35976300 |
| H | 3.53553300  | 2.96790300  | -1.14107800 | C                                     | -1.90613300 | -3.88126100 | -1.49106300 |
| H | 5.39648900  | 2.30475500  | -2.69131300 | H                                     | -1.79987000 | -4.49568000 | -2.39668500 |
| O | 0.58820500  | -2.34082500 | 2.84193300  | H                                     | -2.82514200 | -4.21812700 | -0.99933500 |
| C | 0.08303200  | -1.73692200 | 1.99221700  | P                                     | 1.32029100  | -2.08971200 | -0.73177800 |
| C | -1.71771000 | -1.05851500 | 2.06237300  | C                                     | 2.58912500  | -2.46934900 | 0.55282400  |
| C | -2.68833600 | -2.06938200 | 1.99327900  | C                                     | 3.64569500  | -1.56331000 | 0.75344400  |
| C | -1.89922400 | 0.04457100  | 2.90848500  | C                                     | 2.49824100  | -3.59509300 | 1.38373300  |
| C | -3.85757000 | -1.95882700 | 2.74652300  | C                                     | 4.60471900  | -1.80713700 | 1.73619200  |
| H | -2.53134600 | -2.93856400 | 1.36051800  | H                                     | 3.70655500  | -0.65670800 | 0.15727200  |
| C | -3.07451800 | 0.14627600  | 3.65589900  | C                                     | 3.45208400  | -3.82655200 | 2.37918800  |
| H | -1.10856500 | 0.78414000  | 2.97910000  | H                                     | 1.68167100  | -4.30208200 | 1.26852300  |
| C | -4.05120400 | -0.85009300 | 3.57506000  | C                                     | 4.51273600  | -2.93829500 | 2.55241400  |
| H | -4.61324500 | -2.73766000 | 2.68936900  | H                                     | 5.42422900  | -1.10514500 | 1.86867700  |
| H | -3.22249500 | 1.00219700  | 4.30953200  | H                                     | 3.36526800  | -4.70607100 | 3.01211700  |



|   |             |             |             |                                         |             |             |             |
|---|-------------|-------------|-------------|-----------------------------------------|-------------|-------------|-------------|
| H | 5.26030300  | -3.12205100 | 3.31967600  | H                                       | 1.83075400  | -0.62759400 | 6.20684700  |
| C | 2.33034500  | -1.83025300 | -2.26042100 | H                                       | 0.39661800  | 0.19855200  | 6.85672400  |
| C | 3.57713800  | -2.44921000 | -2.44576300 | H                                       | 1.93878200  | 1.07058100  | 6.71613400  |
| C | 1.76374000  | -1.11062300 | -3.32220000 | C                                       | 1.53805300  | 4.95804600  | 1.80223800  |
| C | 4.24543600  | -2.34338300 | -3.66668000 | H                                       | 2.17120400  | 5.85270900  | 1.82085400  |
| H | 4.03222800  | -3.01114200 | -1.63625800 | H                                       | 0.68316900  | 5.11985300  | 2.46600500  |
| C | 2.43058600  | -1.01714400 | -4.54649700 | H                                       | 1.15865400  | 4.81391400  | 0.78654900  |
| H | 0.82208600  | -0.58735200 | -3.18955700 | Pd                                      | -0.32237200 | -0.35410400 | 0.25340700  |
| C | 3.67248800  | -1.62995900 | -4.72164700 | C                                       | 3.55347100  | 2.98037100  | -2.03488900 |
| H | 5.21290700  | -2.82290700 | -3.79283700 | C                                       | 1.69778100  | 2.91766300  | -3.66743600 |
| H | 1.97789700  | -0.45143500 | -5.35673200 | C                                       | 2.67189600  | 3.83998000  | -2.93833800 |
| H | 4.19328200  | -1.55037000 | -5.67254600 | H                                       | 4.20818300  | 3.57500800  | -1.39046800 |
| C | -3.43538300 | 0.07875100  | -1.42164700 | H                                       | 2.24705800  | 2.29971200  | -4.39451500 |
| C | -4.57599500 | 0.57904100  | -0.77428700 | H                                       | 2.11107500  | 4.56162700  | -2.32769400 |
| C | -3.10516400 | 0.56482000  | -2.69749600 | N                                       | 1.50569500  | 1.60305900  | -1.51596100 |
| C | -5.38806200 | 1.52317500  | -1.40456100 | C                                       | 0.97416100  | 1.95329600  | -2.71576900 |
| H | -4.83642900 | 0.23289100  | 0.22075500  | C                                       | 2.72467100  | 2.05329600  | -1.13337600 |
| C | -3.92332400 | 1.50562900  | -3.32314400 | O                                       | -0.11462200 | 1.48326300  | -3.10456400 |
| H | -2.18403700 | 0.26226600  | -3.18252000 | O                                       | 3.24086800  | 1.71681400  | -0.04535900 |
| C | -5.06888600 | 1.98240000  | -2.68324100 | H                                       | 0.93483000  | 3.46249600  | -4.23209400 |
| H | -6.26918400 | 1.89959600  | -0.89167000 | H                                       | 3.27425600  | 4.42326400  | -3.64611400 |
| H | -3.65050500 | 1.87613700  | -4.30733700 | H                                       | 4.20902600  | 2.34535700  | -2.65033800 |
| H | -5.70250800 | 2.71733100  | -3.17283500 | O                                       | -1.70956600 | 0.56794300  | 2.51284900  |
| C | -3.40180600 | -2.01548000 | 0.59730100  | C                                       | -1.42269000 | 0.93041200  | 1.39003800  |
| C | -4.65101300 | -2.52757100 | 0.20144700  | C                                       | -1.71940200 | 2.31719600  | 0.91359700  |
| C | -2.95968700 | -2.24373700 | 1.90793700  | C                                       | -1.46064800 | 2.72068800  | -0.40040600 |
| C | -5.43666900 | -3.25209800 | 1.09674100  | C                                       | -2.28333200 | 3.22561600  | 1.82846400  |
| H | -5.01591800 | -2.35299300 | -0.80711500 | C                                       | -1.76483600 | 4.02445700  | -0.79706100 |
| C | -3.75036100 | -2.96964900 | 2.80361900  | H                                       | -1.02482100 | 2.02599400  | -1.10981700 |
| H | -2.01034400 | -1.83220000 | 2.23260100  | C                                       | -2.57910100 | 4.52466200  | 1.42940000  |
| C | -4.98600200 | -3.47536900 | 2.40120200  | H                                       | -2.47961900 | 2.89154600  | 2.84231700  |
| H | -6.39952700 | -3.64153200 | 0.77676600  | C                                       | -2.31938700 | 4.92594300  | 0.11268000  |
| H | -3.39803200 | -3.13206000 | 3.81865500  | H                                       | -1.57120300 | 4.32641500  | -1.82255700 |
| H | -5.59954400 | -4.03860000 | 3.09946400  | H                                       | -3.01461500 | 5.22547600  | 2.13739400  |
| P | 2.04298300  | 1.12581000  | 2.46393300  | H                                       | -2.55503800 | 5.94031900  | -0.20064500 |
| H | 3.40907300  | 1.14342900  | 2.21643300  |                                         |             |             |             |
| C | 0.89756600  | 0.76502500  | 4.84178000  |                                         |             |             |             |
| H | 0.35624200  | 1.71792700  | 4.86077900  | <b>5b</b>                               |             |             |             |
| H | 0.26499200  | 0.02350300  | 4.34627000  | SCF energy: -3364.971897                |             |             |             |
| C | 2.34359000  | 3.74989000  | 2.24177400  | SCF energy in solution: -3364.02906933  |             |             |             |
| H | 2.72101800  | 3.87612100  | 3.26452800  | Free energy in solution: -3363.27249433 |             |             |             |
| H | 3.18074300  | 3.55971700  | 1.56354800  | P                                       | -2.28706700 | -1.28685600 | -0.56103000 |
| O | 1.20904000  | 0.06268800  | 1.81776700  | C                                       | 0.59593400  | -4.01629200 | 0.31428700  |
| O | 1.46403400  | 2.59706300  | 2.20512300  | H                                       | 1.08430600  | -4.81270600 | -0.25791000 |
| O | 2.11336400  | 0.94207000  | 4.06993200  | H                                       | 0.93715400  | -4.12306000 | 1.35094600  |
| C | 1.29318000  | 0.32555100  | 6.23935800  | C                                       | -1.86879900 | -2.71850500 | -1.68624000 |

|   |             |             |             |    |             |             |             |
|---|-------------|-------------|-------------|----|-------------|-------------|-------------|
| H | -2.66812100 | -2.78741000 | -2.43356200 | H  | -4.83645300 | -2.47312900 | -1.45888300 |
| H | -0.96991500 | -2.42198100 | -2.23079500 | C  | -4.87229900 | -2.55308100 | 2.41397000  |
| C | -0.93295500 | -4.20804600 | 0.31614400  | H  | -2.96964000 | -1.55339800 | 2.31794300  |
| H | -1.37176100 | -3.51914000 | 1.04665100  | C  | -5.93848000 | -3.09140700 | 1.69478300  |
| H | -1.12157600 | -5.21558000 | 0.71144900  | H  | -6.74544300 | -3.47674900 | -0.27099600 |
| C | -1.70050600 | -4.10294700 | -1.01575700 | H  | -4.88217200 | -2.56951900 | 3.50043100  |
| H | -1.23917500 | -4.76942500 | -1.75739800 | H  | -6.78317300 | -3.53297300 | 2.21690600  |
| H | -2.70343200 | -4.50365600 | -0.82796800 | P  | 1.95521400  | 1.03949100  | 2.68095900  |
| P | 1.19126700  | -2.33508400 | -0.22535000 | H  | 3.18954000  | 1.22656200  | 2.07536100  |
| C | 2.91966700  | -2.22644500 | 0.41278600  | C  | 1.48475500  | 0.29741900  | 5.19001800  |
| C | 3.58619500  | -1.00001500 | 0.24839200  | H  | 0.72341300  | 1.07821100  | 5.29789900  |
| C | 3.60157700  | -3.29716700 | 1.00792800  | H  | 0.99412500  | -0.61772100 | 4.84539600  |
| C | 4.90930300  | -0.85757900 | 0.66669800  | C  | 1.97603400  | 3.68412900  | 2.75121400  |
| H | 3.07602300  | -0.14436900 | -0.18761000 | H  | 2.58594600  | 3.69490200  | 3.66304900  |
| C | 4.92432200  | -3.14624600 | 1.43315500  | H  | 2.62322700  | 3.68468300  | 1.86981300  |
| H | 3.11762000  | -4.26017600 | 1.13853200  | O  | 1.07372300  | -0.05039800 | 2.14020300  |
| C | 5.58194500  | -1.92786800 | 1.26222200  | O  | 1.20253800  | 2.44742500  | 2.72477900  |
| H | 5.40604800  | 0.09948800  | 0.53086300  | O  | 2.44460200  | 0.71374800  | 4.18277600  |
| H | 5.43949600  | -3.98612400 | 1.89245800  | C  | 2.23972200  | 0.07587000  | 6.48714400  |
| H | 6.61149300  | -1.81280900 | 1.59110200  | H  | 3.00426600  | -0.69760300 | 6.36250400  |
| C | 1.49337800  | -2.47321800 | -2.04623600 | H  | 1.54430800  | -0.24553800 | 7.27055200  |
| C | 1.80951100  | -3.68464200 | -2.68444900 | H  | 2.73003700  | 0.99772500  | 6.81619900  |
| C | 1.43399300  | -1.29669700 | -2.80994800 | C  | 0.99670100  | 4.84121600  | 2.73483000  |
| C | 2.03971000  | -3.71928200 | -4.06004700 | H  | 1.54888300  | 5.78793900  | 2.75885500  |
| H | 1.88701800  | -4.60903900 | -2.12011400 | H  | 0.33197300  | 4.80532200  | 3.60398400  |
| C | 1.66145100  | -1.33618300 | -4.18898400 | H  | 0.38559900  | 4.81407900  | 1.82843400  |
| H | 1.22715600  | -0.33419600 | -2.34514300 | Pd | -0.44920500 | -0.61552400 | 0.68488100  |
| C | 1.96007100  | -2.54615800 | -4.81552100 | C  | 3.36269800  | 3.82164500  | -1.66973000 |
| H | 2.28111900  | -4.66441500 | -4.54025300 | C  | 2.21000800  | 3.53619600  | -3.84597600 |
| H | 1.58185500  | -0.40895200 | -4.74758500 | C  | 2.63830700  | 4.55865300  | -2.79505500 |
| H | 2.13141700  | -2.57899900 | -5.88858200 | H  | 3.58955100  | 4.47208600  | -0.81899200 |
| C | -2.93416900 | -0.02132800 | -1.72806400 | H  | 3.09786600  | 3.13976900  | -4.36210300 |
| C | -4.24259800 | 0.48119300  | -1.65213100 | H  | 1.75106100  | 5.06555300  | -2.38957500 |
| C | -2.05768900 | 0.49511200  | -2.69679500 | N  | 1.66407900  | 1.97792100  | -1.93103400 |
| C | -4.67142300 | 1.45996400  | -2.55085800 | C  | 1.46383700  | 2.34188800  | -3.23076700 |
| H | -4.92868400 | 0.11743600  | -0.89475900 | C  | 2.55718500  | 2.62145400  | -1.14721500 |
| C | -2.49100500 | 1.47267200  | -3.59219000 | O  | 0.69124300  | 1.70620900  | -3.96886600 |
| H | -1.01994000 | 0.18389600  | -2.75474100 | O  | 2.78288800  | 2.25475100  | 0.02926900  |
| C | -3.80078900 | 1.95163500  | -3.52511400 | H  | 1.56610600  | 3.96593500  | -4.61940200 |
| H | -5.68740500 | 1.84028700  | -2.48181100 | H  | 3.27427400  | 5.33840600  | -3.23282800 |
| H | -1.77569100 | 1.86269000  | -4.30905100 | H  | 4.32744000  | 3.43914100  | -2.03707600 |
| H | -4.13868800 | 2.71682400  | -4.21942300 | O  | -2.03246600 | 0.43266400  | 2.75678900  |
| C | -3.75460200 | -1.94566100 | 0.34455100  | C  | -1.60898400 | 0.74227100  | 1.66058400  |
| C | -4.83441700 | -2.49481700 | -0.37263000 | C  | -1.80110700 | 2.11066900  | 1.09237400  |
| C | -3.78387900 | -1.98375300 | 1.74606500  | C  | -1.09004400 | 2.55090300  | -0.03137000 |
| C | -5.91826700 | -3.06012900 | 0.29753200  | C  | -2.72319400 | 2.96749900  | 1.72077000  |

|                                         |             |             |             |    |             |             |             |
|-----------------------------------------|-------------|-------------|-------------|----|-------------|-------------|-------------|
| C                                       | -1.30553000 | 3.83966100  | -0.52258100 | C  | -1.59728800 | -1.51638100 | 4.74901800  |
| H                                       | -0.35142800 | 1.91540100  | -0.51506300 | H  | -1.70788300 | -3.65547800 | 5.02343700  |
| C                                       | -2.94108900 | 4.24636900  | 1.21918100  | H  | -1.44621300 | 0.55349700  | 4.14460400  |
| H                                       | -3.25547300 | 2.60988200  | 2.59670600  | H  | -1.91223600 | -1.28934800 | 5.76421800  |
| C                                       | -2.23180000 | 4.68354600  | 0.09364700  | C  | 3.20057800  | 0.94574800  | 1.56652000  |
| H                                       | -0.75027000 | 4.17378200  | -1.39393500 | C  | 4.04104900  | 1.97497400  | 1.11538700  |
| H                                       | -3.66045700 | 4.90415300  | 1.70042800  | C  | 2.54138300  | 1.09586900  | 2.79786200  |
| H                                       | -2.40424900 | 5.68208200  | -0.30083000 | C  | 4.23197000  | 3.12064500  | 1.88826800  |
|                                         |             |             |             | H  | 4.54900200  | 1.88448400  | 0.16059300  |
| <b>6b</b>                               |             |             |             | C  | 2.73655500  | 2.24265800  | 3.56774000  |
| SCF energy: -3364.971374                |             |             |             | H  | 1.86023000  | 0.32994700  | 3.15691000  |
| SCF energy in solution: -3364.03162096  |             |             |             | C  | 3.58375200  | 3.25642800  | 3.11673900  |
| Free energy in solution: -3363.27774196 |             |             |             | H  | 4.88513200  | 3.90908900  | 1.52475100  |
|                                         |             |             |             | H  | 2.22014200  | 2.34404100  | 4.51827500  |
| P                                       | 2.87577300  | -0.53967500 | 0.52969900  | H  | 3.73222900  | 4.15017900  | 3.71649400  |
| C                                       | 0.81481600  | -4.00362900 | 0.51586500  | C  | 4.43713300  | -0.81375200 | -0.40793300 |
| H                                       | 0.73698100  | -4.40403000 | 1.53239900  | C  | 5.67993900  | -0.79019700 | 0.25094500  |
| H                                       | 0.33570900  | -4.73722100 | -0.13848700 | C  | 4.39368100  | -1.13224600 | -1.77267100 |
| C                                       | 2.92470700  | -1.92440500 | 1.78628800  | C  | 6.85306300  | -1.07910200 | -0.44412000 |
| H                                       | 3.69385500  | -1.66529400 | 2.52345100  | H  | 5.73341800  | -0.53551400 | 1.30598300  |
| H                                       | 1.96568700  | -1.91315800 | 2.31417800  | C  | 5.57284400  | -1.42115200 | -2.46548000 |
| C                                       | 2.29604700  | -3.86226600 | 0.12269900  | H  | 3.44590000  | -1.12433700 | -2.29949800 |
| H                                       | 2.38367000  | -3.24595800 | -0.78055800 | C  | 6.80053300  | -1.39675300 | -1.80482300 |
| H                                       | 2.66855600  | -4.85754000 | -0.15425600 | H  | 7.80744500  | -1.05503000 | 0.07500000  |
| C                                       | 3.22449000  | -3.32581500 | 1.22277900  | H  | 5.52633000  | -1.65726900 | -3.52492100 |
| H                                       | 3.20210900  | -4.02386800 | 2.07169200  | H  | 7.71611500  | -1.61968100 | -2.34610500 |
| H                                       | 4.25285300  | -3.34042200 | 0.84402500  | P  | -2.14559000 | 0.60421700  | -1.80451200 |
| P                                       | -0.21783300 | -2.43223100 | 0.39749700  | H  | -2.85397800 | 0.58521500  | -0.56974800 |
| C                                       | -1.74029000 | -2.99655400 | -0.47374900 | C  | -2.83625600 | -0.38701200 | -4.18005700 |
| C                                       | -2.99747500 | -2.50240600 | -0.09547200 | H  | -2.32502700 | 0.43632600  | -4.69274000 |
| C                                       | -1.64861100 | -3.83756000 | -1.59654300 | H  | -2.13543700 | -1.21959000 | -4.07251700 |
| C                                       | -4.14395700 | -2.86423700 | -0.80677200 | C  | -2.76054200 | 3.19217200  | -1.82697400 |
| H                                       | -3.11075100 | -1.81352700 | 0.73510700  | H  | -3.78882600 | 2.88344100  | -2.05052200 |
| C                                       | -2.79724300 | -4.21038900 | -2.29496700 | H  | -2.65576500 | 3.34395000  | -0.74910100 |
| H                                       | -0.68377900 | -4.20204500 | -1.94079000 | O  | -0.85124700 | -0.18348800 | -1.90267100 |
| C                                       | -4.04833800 | -3.72918100 | -1.89741100 | O  | -1.84265200 | 2.13388700  | -2.21612600 |
| H                                       | -5.08912000 | -2.43581000 | -0.48995000 | O  | -3.23205600 | 0.05097400  | -2.85582700 |
| H                                       | -2.71199800 | -4.87426700 | -3.15188600 | C  | -4.09224500 | -0.80603100 | -4.92096600 |
| H                                       | -4.94165100 | -4.02217900 | -2.44357900 | H  | -4.59395300 | -1.61990800 | -4.38864500 |
| C                                       | -0.77561200 | -2.10800100 | 2.12644200  | H  | -3.83267700 | -1.15299800 | -5.92776500 |
| C                                       | -1.07646300 | -3.14009000 | 3.03295300  | H  | -4.79044600 | 0.03226100  | -5.01151600 |
| C                                       | -0.92340700 | -0.77624900 | 2.54390400  | C  | -2.38695100 | 4.43783900  | -2.60865500 |
| C                                       | -1.47864000 | -2.84638000 | 4.33497200  | H  | -3.05108100 | 5.26381300  | -2.32862200 |
| H                                       | -1.01608200 | -4.17972300 | 2.72376900  | H  | -2.48196000 | 4.26599800  | -3.68588400 |
| C                                       | -1.32988100 | -0.48524400 | 3.84943700  | H  | -1.35562700 | 4.73077100  | -2.39059600 |
| H                                       | -0.76526800 | 0.04545100  | 1.85138200  | Pd | 0.90752400  | -0.44890600 | -0.67454200 |

|                                         |             |             |             |   |             |             |             |
|-----------------------------------------|-------------|-------------|-------------|---|-------------|-------------|-------------|
| C                                       | -5.76588100 | 1.22442300  | 2.55094800  | P | 0.14107700  | 2.56917800  | -0.20862500 |
| C                                       | -3.80663300 | 2.72588300  | 2.81096600  | C | 1.84999300  | 3.04820800  | -0.71939900 |
| C                                       | -5.32527800 | 2.68513100  | 2.64081200  | C | 2.89575600  | 2.20690600  | -0.30403700 |
| H                                       | -6.82435700 | 1.11597800  | 2.29558900  | C | 2.16020600  | 4.18848600  | -1.47389600 |
| H                                       | -3.53593600 | 2.32123300  | 3.79879900  | C | 4.21690700  | 2.49363300  | -0.64449300 |
| H                                       | -5.60499500 | 3.21218900  | 1.71786200  | H | 2.67901100  | 1.31881300  | 0.28247100  |
| N                                       | -3.69305500 | 0.82557400  | 1.16726600  | C | 3.48577300  | 4.47585100  | -1.81133900 |
| C                                       | -3.08730700 | 1.88464200  | 1.74696100  | H | 1.38280000  | 4.87176400  | -1.80039300 |
| C                                       | -4.95717300 | 0.42440300  | 1.51643500  | C | 4.51532600  | 3.62907300  | -1.40163100 |
| O                                       | -1.91397300 | 2.20742200  | 1.44684300  | H | 5.00164500  | 1.81003600  | -0.33457300 |
| O                                       | -5.47206300 | -0.59050400 | 1.03594200  | H | 3.70827100  | 5.36501000  | -2.39591500 |
| H                                       | -3.40015600 | 3.74122300  | 2.76599400  | H | 5.54413100  | 3.84964800  | -1.67377900 |
| H                                       | -5.83081500 | 3.20327800  | 3.46557000  | C | 0.20393800  | 2.97044400  | 1.59894700  |
| H                                       | -5.62721100 | 0.73339900  | 3.52650900  | C | 0.11140200  | 4.27598200  | 2.10824800  |
| O                                       | 2.19043000  | 0.82596100  | -2.82454500 | C | 0.41766600  | 1.90937400  | 2.49333800  |
| C                                       | 1.67168300  | 1.10565500  | -1.76368300 | C | 0.20796900  | 4.51030600  | 3.48046100  |
| C                                       | 1.48697400  | 2.51745900  | -1.30956300 | H | -0.02531400 | 5.12201000  | 1.44070400  |
| C                                       | 0.67677000  | 2.83321600  | -0.21327300 | C | 0.52541500  | 2.14705900  | 3.86664200  |
| C                                       | 2.13956800  | 3.54426400  | -2.01494800 | H | 0.51485700  | 0.88823700  | 2.13542500  |
| C                                       | 0.51138300  | 4.16235500  | 0.17636000  | C | 0.41293600  | 3.44616200  | 4.36320400  |
| H                                       | 0.13942000  | 2.05886900  | 0.32295600  | H | 0.13012900  | 5.52640300  | 3.85896100  |
| C                                       | 1.98989400  | 4.86799400  | -1.61214100 | H | 0.69988800  | 1.30260500  | 4.52670000  |
| H                                       | 2.75365800  | 3.28333100  | -2.87147200 | H | 0.49005200  | 3.63320200  | 5.43121400  |
| C                                       | 1.17471000  | 5.17835900  | -0.51547400 | C | -3.17193000 | -0.70830900 | 1.52748800  |
| H                                       | -0.14680300 | 4.38235500  | 1.01091800  | C | -3.95254700 | -1.85430100 | 1.31262400  |
| H                                       | 2.50067900  | 5.66092600  | -2.15282600 | C | -2.62700800 | -0.48474600 | 2.80240500  |
| H                                       | 1.05511100  | 6.21440500  | -0.20736600 | C | -4.19863700 | -2.74654600 | 2.35696800  |
|                                         |             |             |             | H | -4.37149800 | -2.05271800 | 0.33131300  |
|                                         |             |             |             | C | -2.87701300 | -1.37855600 | 3.84338100  |
| <b>TS4b</b>                             |             |             |             | H | -1.99075700 | 0.37507400  | 2.98896400  |
| SCF energy: -3364.964885                |             |             |             | C | -3.66522800 | -2.50975800 | 3.62458200  |
| SCF energy in solution: -3364.01857467  |             |             |             | H | -4.80479800 | -3.62986100 | 2.17506000  |
| Free energy in solution: -3363.26669767 |             |             |             | H | -2.44337100 | -1.19375000 | 4.82202100  |
| P                                       | -2.77257900 | 0.44905000  | 0.15172700  | H | -3.85547100 | -3.20734200 | 4.43575500  |
| C                                       | -0.94595100 | 3.87008800  | -0.99371900 | C | -4.20673800 | 0.31220900  | -1.00066100 |
| H                                       | -0.88804800 | 4.81830900  | -0.44681100 | C | -5.52104500 | 0.44603900  | -0.51671800 |
| H                                       | -0.49959700 | 4.04955000  | -1.97788200 | C | -4.00199600 | 0.14412300  | -2.37753300 |
| C                                       | -3.06913900 | 2.11887200  | 0.94287300  | C | -6.60484200 | 0.41299100  | -1.39254000 |
| H                                       | -3.92788600 | 2.01434600  | 1.61639500  | H | -5.70083000 | 0.56488700  | 0.54834000  |
| H                                       | -2.20132900 | 2.32243500  | 1.57449700  | C | -5.09212000 | 0.11056700  | -3.25231200 |
| C                                       | -2.41259400 | 3.47006400  | -1.23784800 | H | -2.99723300 | 0.00738000  | -2.76181600 |
| H                                       | -2.43264600 | 2.56286300  | -1.85262300 | C | -6.39119600 | 0.24633200  | -2.76420300 |
| H                                       | -2.85569200 | 4.25906300  | -1.86084700 | H | -7.61499800 | 0.51542100  | -1.00500300 |
| C                                       | -3.33655400 | 3.29310700  | -0.02189300 | H | -4.91928900 | -0.02971100 | -4.31578500 |
| H                                       | -3.32927100 | 4.21501800  | 0.57678100  | H | -7.23672400 | 0.21844600  | -3.44644500 |
| H                                       | -4.35728100 | 3.18948300  | -0.40791700 | P | 2.47248500  | -0.91472600 | -1.82667200 |

|    |             |             |             |                          |                |             |             |
|----|-------------|-------------|-------------|--------------------------|----------------|-------------|-------------|
| H  | 3.62390600  | -0.83169200 | -0.60185400 |                          |                |             |             |
| C  | 2.56648800  | -0.38895700 | -4.45604700 |                          |                |             |             |
| H  | 1.97418700  | -1.29456500 | -4.63526400 |                          |                |             |             |
| H  | 1.87574000  | 0.45820000  | -4.38967500 |                          |                |             |             |
| C  | 3.01988600  | -3.48436500 | -2.15589300 |                          |                |             |             |
| H  | 3.53309900  | -3.42074700 | -3.12450500 |                          |                |             |             |
| H  | 3.76997500  | -3.30467500 | -1.37259000 |                          |                |             |             |
| O  | 1.17011900  | -0.09596000 | -1.80269700 |                          |                |             |             |
| O  | 1.99694000  | -2.47526700 | -2.09861000 |                          |                |             |             |
| O  | 3.27272500  | -0.51729700 | -3.20501600 |                          |                |             |             |
| C  | 3.59364200  | -0.17897000 | -5.55614300 |                          |                |             |             |
| H  | 4.18591200  | 0.72157000  | -5.36281600 |                          |                |             |             |
| H  | 3.09348400  | -0.06497800 | -6.52522000 |                          |                |             |             |
| H  | 4.27788300  | -1.03191400 | -5.61745900 |                          |                |             |             |
| C  | 2.37119700  | -4.84608300 | -1.97399900 |                          |                |             |             |
| H  | 3.12852500  | -5.63632100 | -2.04279900 |                          |                |             |             |
| H  | 1.61760200  | -5.01838500 | -2.74936600 |                          |                |             |             |
| H  | 1.87898100  | -4.91318400 | -0.99931000 |                          |                |             |             |
| Pd | -0.65523700 | 0.21976200  | -0.76258500 |                          |                |             |             |
| C  | 5.32124800  | -1.20565000 | 2.44568600  |                          |                |             |             |
| C  | 3.55625600  | -1.21641300 | 4.19758100  |                          |                |             |             |
| C  | 4.82882800  | -1.91129000 | 3.70986800  |                          |                |             |             |
| H  | 6.12415600  | -1.75058300 | 1.94052100  |                          |                |             |             |
| H  | 3.79940000  | -0.20359800 | 4.55416300  |                          |                |             |             |
| H  | 4.60902600  | -2.96268300 | 3.48110700  |                          |                |             |             |
| N  | 2.91000100  | -0.93880200 | 1.77019500  |                          |                |             |             |
| C  | 2.51379600  | -1.06908400 | 3.08352000  |                          |                |             |             |
| C  | 4.19124700  | -0.99335400 | 1.44719600  |                          |                |             |             |
| O  | 1.31774700  | -1.03444600 | 3.38817300  |                          |                |             |             |
| O  | 4.57315200  | -0.84457600 | 0.22796900  |                          |                |             |             |
| H  | 3.08156400  | -1.74037400 | 5.03198400  |                          |                |             |             |
| H  | 5.60345600  | -1.90974400 | 4.48544600  |                          |                |             |             |
| H  | 5.72624100  | -0.21406300 | 2.69773700  |                          |                |             |             |
| O  | -1.59245400 | -1.82748800 | -2.46520900 |                          |                |             |             |
| C  | -1.15115900 | -1.67128900 | -1.34633500 |                          |                |             |             |
| C  | -0.89016000 | -2.82114400 | -0.42394100 |                          |                |             |             |
| C  | -0.23891100 | -2.65574200 | 0.80422300  |                          |                |             |             |
| C  | -1.33594900 | -4.09722500 | -0.81089500 |                          |                |             |             |
| C  | -0.03460000 | -3.75462900 | 1.63944200  |                          |                |             |             |
| H  | 0.12695700  | -1.68239500 | 1.11563000  |                          |                |             |             |
| C  | -1.13734000 | -5.18971300 | 0.02735300  |                          |                |             |             |
| H  | -1.83128500 | -4.20745800 | -1.77054600 |                          |                |             |             |
| C  | -0.48594500 | -5.01896700 | 1.25552600  |                          |                |             |             |
| H  | 0.46915800  | -3.60518700 | 2.58931400  |                          |                |             |             |
| H  | -1.48648000 | -6.17484000 | -0.27234100 |                          |                |             |             |
| H  | -0.33356000 | -5.87344500 | 1.91077900  |                          |                |             |             |
|    |             |             |             | <b>7b</b>                |                |             |             |
|    |             |             |             | SCF energy:              | -2965.004062   |             |             |
|    |             |             |             | SCF energy in solution:  | -2964.17393501 |             |             |
|    |             |             |             | Free energy in solution: | -2963.53252801 |             |             |
|    |             |             |             | P                        | 2.11399200     | -1.32187100 | 0.31126900  |
|    |             |             |             | C                        | -1.02425300    | -3.40447100 | 1.42926900  |
|    |             |             |             | H                        | -0.68421800    | -3.24103200 | 2.45838900  |
|    |             |             |             | H                        | -1.91036900    | -4.04407700 | 1.50391100  |
|    |             |             |             | C                        | 2.00573600     | -2.63853300 | 1.64488100  |
|    |             |             |             | H                        | 3.00845700     | -2.75751500 | 2.07044200  |
|    |             |             |             | H                        | 1.37804500     | -2.21333400 | 2.43636300  |
|    |             |             |             | C                        | 0.08644900     | -4.07685100 | 0.58865700  |
|    |             |             |             | H                        | 0.13654200     | -3.63144800 | -0.41252200 |
|    |             |             |             | H                        | -0.16519800    | -5.13315100 | 0.43042400  |
|    |             |             |             | C                        | 1.48032800     | -4.02498200 | 1.23217400  |
|    |             |             |             | H                        | 1.47304000     | -4.64433400 | 2.14038200  |
|    |             |             |             | H                        | 2.19823900     | -4.49061500 | 0.54764600  |
|    |             |             |             | P                        | -1.55537600    | -1.72995100 | 0.78083700  |
|    |             |             |             | C                        | -2.87254800    | -2.16783200 | -0.43287900 |
|    |             |             |             | C                        | -3.82445100    | -1.19709700 | -0.79249200 |
|    |             |             |             | C                        | -2.93534300    | -3.43230100 | -1.04137800 |
|    |             |             |             | C                        | -4.82141000    | -1.49953900 | -1.72010400 |
|    |             |             |             | H                        | -3.78024900    | -0.20338600 | -0.36164000 |
|    |             |             |             | C                        | -3.92826300    | -3.72451300 | -1.97954000 |
|    |             |             |             | H                        | -2.21605700    | -4.20529000 | -0.79130400 |
|    |             |             |             | C                        | -4.87725200    | -2.76051600 | -2.31812700 |
|    |             |             |             | H                        | -5.55432300    | -0.74028200 | -1.97893100 |
|    |             |             |             | H                        | -3.95972800    | -4.70968800 | -2.43784800 |
|    |             |             |             | H                        | -5.65378200    | -2.98883200 | -3.04341100 |
|    |             |             |             | C                        | -2.49118300    | -1.07582500 | 2.22617800  |
|    |             |             |             | C                        | -3.69447500    | -1.65813900 | 2.65801900  |
|    |             |             |             | C                        | -1.95555100    | -0.00398300 | 2.95445300  |
|    |             |             |             | C                        | -4.33922700    | -1.18286300 | 3.79926900  |
|    |             |             |             | H                        | -4.13559200    | -2.47533400 | 2.09392600  |
|    |             |             |             | C                        | -2.60147600    | 0.46987900  | 4.09870700  |
|    |             |             |             | H                        | -1.04355300    | 0.47412200  | 2.60888000  |
|    |             |             |             | C                        | -3.79224900    | -0.11947300 | 4.52303100  |
|    |             |             |             | H                        | -5.27164000    | -1.63908300 | 4.12139800  |
|    |             |             |             | H                        | -2.18186700    | 1.31007800  | 4.64513300  |
|    |             |             |             | H                        | -4.29983700    | 0.25357900  | 5.40861600  |
|    |             |             |             | C                        | 3.55149500     | -0.33121900 | 0.91203100  |
|    |             |             |             | C                        | 4.47238200     | 0.21976600  | 0.00773200  |
|    |             |             |             | C                        | 3.69965500     | -0.05438800 | 2.28081400  |
|    |             |             |             | C                        | 5.52461900     | 1.01377300  | 0.46558000  |

|    |             |             |             |                                         |             |             |             |
|----|-------------|-------------|-------------|-----------------------------------------|-------------|-------------|-------------|
| H  | 4.36818600  | 0.03158100  | -1.05626600 | C                                       | 2.58341400  | 4.86572800  | 0.89887400  |
| C  | 4.75305500  | 0.73934500  | 2.73553800  | H                                       | 1.63042700  | 4.07632800  | 2.66612500  |
| H  | 2.99196700  | -0.45293800 | 3.00248500  | H                                       | 3.43864200  | 5.39530600  | -1.01175000 |
| C  | 5.67010100  | 1.27398600  | 1.82902200  | H                                       | 2.90801000  | 5.78144500  | 1.38669000  |
| H  | 6.22962700  | 1.43136700  | -0.24799700 |                                         |             |             |             |
| H  | 4.85489400  | 0.93990000  | 3.79876600  |                                         |             |             |             |
| H  | 6.48979100  | 1.89318500  | 2.18287300  |                                         |             |             |             |
| C  | 2.77799200  | -2.21760500 | -1.15272800 | <b>TS5b</b>                             |             |             |             |
| C  | 3.95631900  | -2.98031000 | -1.06818900 | SCF energy: -3364.968844                |             |             |             |
| C  | 2.08622500  | -2.16048800 | -2.37133200 | SCF energy in solution: -3364.02656241  |             |             |             |
| C  | 4.42463800  | -3.68103500 | -2.17858200 | Free energy in solution: -3363.27607041 |             |             |             |
| H  | 4.51627500  | -3.01899100 | -0.13724100 | P                                       | 2.89060900  | -0.53779600 | 0.52038000  |
| C  | 2.56052100  | -2.86224900 | -3.48311800 | C                                       | 0.85661700  | -4.00944200 | 0.68317200  |
| H  | 1.19410300  | -1.54789000 | -2.45487100 | H                                       | 0.83701400  | -4.28628600 | 1.74310700  |
| C  | 3.72490000  | -3.62397800 | -3.38796100 | H                                       | 0.35133600  | -4.81700300 | 0.14607600  |
| H  | 5.33585700  | -4.26825200 | -2.10182800 | C                                       | 2.98843900  | -1.91277300 | 1.78698400  |
| H  | 2.02058500  | -2.80268500 | -4.42390800 | H                                       | 3.76993500  | -1.63734100 | 2.50489800  |
| H  | 4.09286200  | -4.16796100 | -4.25383700 | H                                       | 2.04084100  | -1.90822000 | 2.33612100  |
| P  | -2.07253100 | 2.34752200  | -0.07319400 | C                                       | 2.31419700  | -3.89425200 | 0.19930600  |
| C  | -3.84930000 | 2.23917000  | -2.12873800 | H                                       | 2.35716700  | -3.31237300 | -0.72990100 |
| H  | -3.16111900 | 2.89782600  | -2.66981600 | H                                       | 2.67255800  | -4.89985000 | -0.05748400 |
| H  | -3.63680800 | 1.21015600  | -2.44132900 | C                                       | 3.29269300  | -3.31646200 | 1.23303800  |
| C  | -1.51178100 | 4.85594300  | -0.76565800 | H                                       | 3.33108300  | -3.99813600 | 2.09470300  |
| H  | -2.58148000 | 5.09780000  | -0.67617300 | H                                       | 4.29920100  | -3.31659900 | 0.79969100  |
| H  | -1.04345300 | 5.06853400  | 0.20751700  | P                                       | -0.19425700 | -2.46092200 | 0.45557600  |
| O  | -1.48354500 | 1.00806900  | -0.68951900 | C                                       | -1.66595500 | -3.08798500 | -0.45682700 |
| O  | -1.33889400 | 3.48092900  | -1.10487400 | C                                       | -2.94096300 | -2.57542500 | -0.17751200 |
| O  | -3.62943900 | 2.36876100  | -0.71467400 | C                                       | -1.51582200 | -3.99224400 | -1.52174200 |
| C  | -5.29668500 | 2.60766400  | -2.42117300 | C                                       | -4.04764300 | -2.97436800 | -0.92899900 |
| H  | -5.98509600 | 1.95428500  | -1.87228100 | H                                       | -3.08985000 | -1.84626800 | 0.61169700  |
| H  | -5.50903600 | 2.51176300  | -3.49332000 | C                                       | -2.62504500 | -4.40113000 | -2.26267400 |
| H  | -5.50244900 | 3.64009200  | -2.11813900 | H                                       | -0.53516600 | -4.37784000 | -1.78927700 |
| C  | -0.87442700 | 5.70944000  | -1.85291700 | C                                       | -3.89385400 | -3.89687600 | -1.96471100 |
| H  | -0.98187100 | 6.77570500  | -1.61775300 | H                                       | -5.01056500 | -2.53121000 | -0.69885300 |
| H  | -1.34958700 | 5.51809600  | -2.82119000 | H                                       | -2.49457300 | -5.10995300 | -3.07666200 |
| H  | 0.19131200  | 5.47731500  | -1.94281400 | H                                       | -4.75557100 | -4.21500200 | -2.54605700 |
| Pd | 0.17007800  | -0.13783900 | -0.11322300 | C                                       | -0.82997400 | -2.10735100 | 2.15182300  |
| O  | 1.59433500  | 1.06203700  | -2.23061500 | C                                       | -1.21802300 | -3.12654700 | 3.03998900  |
| C  | 1.31723300  | 1.25612100  | -1.06515100 | C                                       | -0.93470800 | -0.77187100 | 2.56835500  |
| C  | 1.74195300  | 2.51165900  | -0.35827800 | C                                       | -1.67063400 | -2.81613300 | 4.32139200  |
| C  | 1.44972100  | 2.73352600  | 0.99101500  | H                                       | -1.18085500 | -4.16744100 | 2.72987700  |
| C  | 2.46314800  | 3.47789300  | -1.07726600 | C                                       | -1.39009900 | -0.46237600 | 3.85355700  |
| C  | 1.86681100  | 3.90747300  | 1.61889900  | H                                       | -0.69246100 | 0.03902400  | 1.88812600  |
| H  | 0.88640400  | 1.98262200  | 1.53846900  | C                                       | -1.75032600 | -1.48221500 | 4.73366200  |
| C  | 2.88201100  | 4.64856300  | -0.45106600 | H                                       | -1.96704900 | -3.61464500 | 4.99651100  |
| H  | 2.67654900  | 3.29134500  | -2.12502200 | H                                       | -1.46731500 | 0.58055200  | 4.14667300  |
|    |             |             |             | H                                       | -2.10260800 | -1.24307000 | 5.73373400  |

|    |             |             |             |                                         |             |             |             |
|----|-------------|-------------|-------------|-----------------------------------------|-------------|-------------|-------------|
| C  | 3.24070600  | 0.95192000  | 1.54511100  | H                                       | -3.71668700 | 2.09849100  | 3.85414600  |
| C  | 4.06120700  | 1.98525500  | 1.06767900  | H                                       | -5.66459500 | 3.23646800  | 1.77414200  |
| C  | 2.61978400  | 1.10038300  | 2.79631900  | N                                       | -3.66627800 | 1.01040700  | 1.02537100  |
| C  | 4.27054000  | 3.13245700  | 1.83365500  | C                                       | -3.10464700 | 1.96994500  | 1.81012900  |
| H  | 4.53886600  | 1.89713200  | 0.09715400  | C                                       | -4.94522100 | 0.53415600  | 1.20090600  |
| C  | 2.83268200  | 2.24851800  | 3.55938300  | O                                       | -1.91834500 | 2.31034500  | 1.66113700  |
| H  | 1.95574000  | 0.32996300  | 3.17735700  | O                                       | -5.38558700 | -0.38600700 | 0.51191400  |
| C  | 3.66056100  | 3.26606800  | 3.08174300  | H                                       | -3.55486800 | 3.65266500  | 3.04296900  |
| H  | 4.90786600  | 3.92395100  | 1.44928300  | H                                       | -6.00885300 | 2.96438900  | 3.48055500  |
| H  | 2.34624100  | 2.34777900  | 4.52589000  | H                                       | -5.72169100 | 0.51438500  | 3.19219200  |
| H  | 3.82340900  | 4.16088800  | 3.67616600  | O                                       | 2.09879800  | 0.83758900  | -2.80149000 |
| C  | 4.42542300  | -0.80629100 | -0.46119300 | C                                       | 1.60320400  | 1.11201400  | -1.72842700 |
| C  | 5.68845500  | -0.77647100 | 0.15768400  | C                                       | 1.43834800  | 2.52376300  | -1.26323600 |
| C  | 4.34031100  | -1.12381900 | -1.82436800 | C                                       | 0.65774600  | 2.84185100  | -0.14678200 |
| C  | 6.84047900  | -1.05834000 | -0.57455400 | C                                       | 2.08304200  | 3.54823200  | -1.97809800 |
| H  | 5.77428400  | -0.52249300 | 1.21083000  | C                                       | 0.51356700  | 4.16993600  | 0.25391400  |
| C  | 5.49851300  | -1.40557800 | -2.55459500 | H                                       | 0.12979100  | 2.06654200  | 0.39686100  |
| H  | 3.37618900  | -1.11999400 | -2.32106300 | C                                       | 1.95506300  | 4.87162600  | -1.56550400 |
| C  | 6.74644300  | -1.37495800 | -1.93331400 | H                                       | 2.67348100  | 3.28599800  | -2.85067000 |
| H  | 7.81079100  | -1.02943400 | -0.08605600 | C                                       | 1.16923300  | 5.18377500  | -0.44852500 |
| H  | 5.41958600  | -1.64056100 | -3.61237300 | H                                       | -0.12067300 | 4.39398600  | 1.10584000  |
| H  | 7.64557700  | -1.59213800 | -2.50376300 | H                                       | 2.46000100  | 5.66261000  | -2.11456000 |
| P  | -2.18712000 | 0.63788200  | -1.64322900 | H                                       | 1.06572900  | 6.21922500  | -0.13270400 |
| H  | -2.95635800 | 0.75655200  | -0.26706300 |                                         |             |             |             |
| C  | -2.85732300 | -0.35607300 | -4.03359100 |                                         |             |             |             |
| H  | -2.30784000 | 0.45653100  | -4.52404900 | <b>8b</b>                               |             |             |             |
| H  | -2.18387100 | -1.21183000 | -3.92712800 | SCF energy: -2965.022837                |             |             |             |
| C  | -2.66501500 | 3.23219500  | -1.96117200 | SCF energy in solution: -2964.20207298  |             |             |             |
| H  | -3.69581600 | 2.95352900  | -2.21608200 | Free energy in solution: -2963.55437098 |             |             |             |
| H  | -2.62118900 | 3.47670900  | -0.89362900 | P                                       | 1.84682400  | -1.44747700 | 0.67625800  |
| O  | -0.90917700 | -0.20891100 | -1.75331100 | C                                       | -1.42712200 | -2.08734200 | 2.32304600  |
| O  | -1.78068000 | 2.12090200  | -2.21823100 | H                                       | -0.78505500 | -1.58835900 | 3.05611100  |
| O  | -3.27058900 | 0.07329200  | -2.71677400 | H                                       | -2.33449200 | -2.37719500 | 2.86172900  |
| C  | -4.10608800 | -0.72694600 | -4.81394700 | C                                       | 1.65193800  | -2.41934300 | 2.27614000  |
| H  | -4.64688200 | -1.53199900 | -4.30648200 | H                                       | 2.64537600  | -2.77539300 | 2.57121700  |
| H  | -3.83419800 | -1.06784900 | -5.81994700 | H                                       | 1.35625000  | -1.68704100 | 3.03648100  |
| H  | -4.77705500 | 0.13324400  | -4.90801400 | C                                       | -0.72438700 | -3.31398500 | 1.69510600  |
| C  | -2.20331000 | 4.40564900  | -2.80799400 | H                                       | -0.62946500 | -3.18372500 | 0.60934500  |
| H  | -2.84699800 | 5.27513400  | -2.62916300 | H                                       | -1.35005300 | -4.20372000 | 1.82677900  |
| H  | -2.24665100 | 4.15444600  | -3.87295600 | C                                       | 0.67093300  | -3.60491000 | 2.26803400  |
| H  | -1.17328900 | 4.67616100  | -2.55666600 | H                                       | 0.57844700  | -3.95958900 | 3.30422700  |
| Pd | 0.88596800  | -0.45348000 | -0.62473900 | H                                       | 1.11249400  | -4.42972200 | 1.69696400  |
| C  | -5.82648000 | 1.14503500  | 2.29629100  | P                                       | -1.85562800 | -0.80856800 | 1.02697300  |
| C  | -3.93179400 | 2.63305600  | 2.91612100  | C                                       | -3.25154100 | -1.66343200 | 0.17294500  |
| C  | -5.43290500 | 2.58500200  | 2.62778600  | C                                       | -3.21779600 | -1.83408100 | -1.21955200 |
| H  | -6.86608400 | 1.05380800  | 1.96813300  | C                                       | -4.32011700 | -2.21994200 | 0.90011900  |

|   |             |             |             |                                         |             |             |             |
|---|-------------|-------------|-------------|-----------------------------------------|-------------|-------------|-------------|
| C | -4.23360500 | -2.54651400 | -1.86523500 | H                                       | -1.96930800 | 3.99437300  | -1.68800200 |
| H | -2.41895800 | -1.39693400 | -1.81241900 | H                                       | -0.56216600 | 3.64285600  | -0.67253500 |
| C | -5.33392400 | -2.92305400 | 0.25075800  | O                                       | -1.30073600 | 0.14177700  | -3.03528800 |
| H | -4.37167900 | -2.10007200 | 1.97902800  | O                                       | -0.68398000 | 2.55258100  | -2.44693800 |
| C | -5.29041700 | -3.09054500 | -1.13618900 | O                                       | -2.67783800 | 1.47416100  | -1.24693200 |
| H | -4.19156800 | -2.66823200 | -2.94415400 | C                                       | -4.88900300 | 2.39798800  | -1.47779300 |
| H | -6.15443500 | -3.34237100 | 0.82737300  | H                                       | -5.26759400 | 1.76551800  | -0.66854300 |
| H | -6.07815700 | -3.64252400 | -1.64242800 | H                                       | -5.71039300 | 2.58986300  | -2.17860900 |
| C | -2.59850800 | 0.51846000  | 2.07245000  | H                                       | -4.57314100 | 3.35255300  | -1.04342900 |
| C | -3.94447400 | 0.90207400  | 2.01629400  | C                                       | -0.12023600 | 4.87736200  | -2.39477100 |
| C | -1.74067400 | 1.20191900  | 2.95191200  | H                                       | -0.29097300 | 5.82995500  | -1.87886400 |
| C | -4.42360600 | 1.93091700  | 2.83062200  | H                                       | -0.44088900 | 4.98321700  | -3.43654500 |
| H | -4.62080000 | 0.40251200  | 1.33172500  | H                                       | 0.95244600  | 4.66226200  | -2.38411500 |
| C | -2.22040500 | 2.22539700  | 3.76876500  | Pd                                      | 0.11262100  | 0.04454600  | -0.19880000 |
| H | -0.68544500 | 0.94002800  | 2.99145300  | O                                       | 2.22216500  | 0.53387400  | -2.12832100 |
| C | -3.56683700 | 2.59267300  | 3.71069900  | C                                       | 1.68194200  | 1.00556100  | -1.14727900 |
| H | -5.47071500 | 2.21633300  | 2.77228200  | C                                       | 2.20712700  | 2.28306500  | -0.53321900 |
| H | -1.54215200 | 2.73881100  | 4.44545600  | C                                       | 1.66701800  | 2.81514100  | 0.64316000  |
| H | -3.94288200 | 3.39239800  | 4.34300700  | C                                       | 3.28096800  | 2.93991900  | -1.15450100 |
| C | 3.50723000  | -0.69349000 | 0.97964200  | C                                       | 2.18705900  | 3.98737600  | 1.19418200  |
| C | 4.50606000  | -0.70246200 | -0.00557900 | H                                       | 0.83039400  | 2.30349800  | 1.11476300  |
| C | 3.76580800  | -0.04181700 | 2.19708900  | C                                       | 3.79765600  | 4.11273700  | -0.60908900 |
| C | 5.73760200  | -0.08910600 | 0.23055800  | H                                       | 3.68956000  | 2.51159400  | -2.06424600 |
| H | 4.32077300  | -1.18037100 | -0.96132700 | C                                       | 3.25195500  | 4.63830300  | 0.56733400  |
| C | 4.99836700  | 0.56786600  | 2.43112800  | H                                       | 1.75963300  | 4.39555000  | 2.10662800  |
| H | 3.00465600  | -0.00216900 | 2.97195900  | H                                       | 4.62527600  | 4.62041400  | -1.09813500 |
| C | 5.98946500  | 0.54409800  | 1.44825100  | H                                       | 3.65541400  | 5.55409100  | 0.99217900  |
| H | 6.49996100  | -0.10633800 | -0.54369400 |                                         |             |             |             |
| H | 5.18133000  | 1.06415200  | 3.38052000  |                                         |             |             |             |
| H | 6.94914300  | 1.02065600  | 1.62904300  |                                         |             |             |             |
| C | 2.16375500  | -2.74894400 | -0.58716900 | <b>TS6b</b>                             |             |             |             |
| C | 3.06408100  | -3.80098100 | -0.34350800 | SCF energy: -2964.964239                |             |             |             |
| C | 1.48698600  | -2.69783500 | -1.81573100 | SCF energy in solution: -2964.13425628  |             |             |             |
| C | 3.27227500  | -4.78970800 | -1.30399300 | Free energy in solution: -2963.49535828 |             |             |             |
| H | 3.61379600  | -3.84383400 | 0.59320100  | P                                       | 0.43941900  | 2.20765400  | -0.49832700 |
| C | 1.70101500  | -3.68988600 | -2.77665600 | C                                       | 0.34986300  | -1.04504000 | -2.79179100 |
| H | 0.80825900  | -1.87761300 | -2.03226800 | H                                       | 1.13561200  | -1.08689800 | -3.55626300 |
| C | 2.58793800  | -4.73582000 | -2.52215500 | H                                       | -0.26771600 | -1.93828200 | -2.92357300 |
| H | 3.96929100  | -5.59924000 | -1.10377300 | C                                       | 1.12844600  | 2.08193400  | -2.22711300 |
| H | 1.17564700  | -3.63341300 | -3.72567400 | H                                       | 1.45855500  | 3.08110000  | -2.53789400 |
| H | 2.75266400  | -5.50578800 | -3.27136500 | H                                       | 2.02345300  | 1.45304000  | -2.16555400 |
| P | -1.17730300 | 1.07918800  | -1.86331700 | C                                       | -0.54759200 | 0.19165100  | -2.98032300 |
| C | -3.73540300 | 1.72006100  | -2.19846100 | H                                       | -1.21300500 | 0.26794200  | -2.11413500 |
| H | -3.36177000 | 2.35161200  | -3.01333400 | H                                       | -1.19784300 | -0.01929600 | -3.84045600 |
| H | -4.04842600 | 0.76555900  | -2.63554200 | C                                       | 0.14853100  | 1.52848800  | -3.27874600 |
| C | -0.89681600 | 3.76401900  | -1.71011500 | H                                       | 0.70600300  | 1.44688100  | -4.22322200 |
|   |             |             |             | H                                       | -0.63254400 | 2.27902000  | -3.44991500 |



|   |             |             |             |                          |                |             |             |
|---|-------------|-------------|-------------|--------------------------|----------------|-------------|-------------|
| P | 1.15866300  | -1.26514300 | -1.10313700 | C                        | -4.07170600    | -1.88058100 | -1.92386500 |
| C | 0.95236600  | -3.07024500 | -0.78997400 | H                        | -4.51290000    | -0.87610300 | -1.89503000 |
| C | 2.03122800  | -3.92256400 | -0.51329100 | H                        | -3.13215600    | -1.80969800 | -2.49032400 |
| C | -0.35403600 | -3.59055500 | -0.76652800 | C                        | -5.49076600    | -0.29732500 | 1.16885100  |
| C | 1.80986000  | -5.27543600 | -0.24467800 | H                        | -6.12902200    | -0.92597500 | 0.52959300  |
| H | 3.04645800  | -3.53984900 | -0.50973200 | H                        | -5.31404200    | -0.86314200 | 2.09747300  |
| C | -0.56731700 | -4.94258800 | -0.50032400 | O                        | -1.91653200    | -0.61236900 | -0.21439800 |
| H | -1.20607700 | -2.93564500 | -0.91837900 | O                        | -4.25732100    | -0.02616900 | 0.51077300  |
| C | 0.51292800  | -5.79004800 | -0.24343000 | O                        | -3.80691600    | -2.33552600 | -0.59476800 |
| H | 2.65621300  | -5.92538600 | -0.03760100 | C                        | -5.01964000    | -2.86481900 | -2.59541300 |
| H | -1.58448300 | -5.32404200 | -0.48382300 | H                        | -4.58179200    | -3.86915600 | -2.61771300 |
| H | 0.34420200  | -6.84356200 | -0.03597500 | H                        | -5.23233000    | -2.55734700 | -3.62718900 |
| C | 2.96629700  | -1.06640500 | -1.43335100 | H                        | -5.96715500    | -2.92243500 | -2.04870600 |
| C | 3.60566900  | -1.70568200 | -2.51022700 | C                        | -6.19490300    | 1.01463200  | 1.48727100  |
| C | 3.73211100  | -0.25010200 | -0.58744500 | H                        | -7.14528000    | 0.82856600  | 2.00271500  |
| C | 4.97029000  | -1.52630600 | -2.73583200 | H                        | -6.40948500    | 1.57296900  | 0.56859500  |
| H | 3.04063100  | -2.35976900 | -3.16871300 | H                        | -5.56706300    | 1.64142100  | 2.12980300  |
| C | 5.09971700  | -0.06974100 | -0.81275100 | Pd                       | 0.27298600     | 0.14103200  | 0.69148300  |
| H | 3.24719100  | 0.25010700  | 0.24658600  | O                        | -0.31331600    | 1.25711200  | 3.44287900  |
| C | 5.72024200  | -0.70615800 | -1.88795200 | C                        | -0.03780500    | 0.68863100  | 2.46659500  |
| H | 5.44925400  | -2.02893000 | -3.57187700 | C                        | 0.62603300     | -1.16005000 | 2.44316100  |
| H | 5.67561400  | 0.56820200  | -0.14761000 | C                        | 1.93943300     | -1.25252700 | 2.92929700  |
| H | 6.78328900  | -0.56718800 | -2.06553500 | C                        | -0.30758400    | -2.16054400 | 2.74155400  |
| C | 1.62318800  | 3.34057200  | 0.34963800  | C                        | 2.32926900     | -2.36791000 | 3.67250700  |
| C | 1.21126900  | 4.00275500  | 1.51980700  | H                        | 2.65198400     | -0.45535600 | 2.73652700  |
| C | 2.94596000  | 3.50878400  | -0.08856500 | C                        | 0.09144600     | -3.27201700 | 3.48774500  |
| C | 2.09701000  | 4.81484200  | 2.22594100  | H                        | -1.33125700    | -2.07834700 | 2.38532500  |
| H | 0.19234500  | 3.88720200  | 1.87831800  | C                        | 1.40528700     | -3.37913000 | 3.94952900  |
| C | 3.83242400  | 4.32192600  | 0.62320000  | H                        | 3.34900800     | -2.44158500 | 4.04221700  |
| H | 3.29839500  | 3.00778100  | -0.98436900 | H                        | -0.63004800    | -4.05458800 | 3.70754500  |
| C | 3.41179100  | 4.97685200  | 1.78039200  | H                        | 1.70742000     | -4.24464000 | 4.53358300  |
| H | 1.75897200  | 5.32087800  | 3.12608700  |                          |                |             |             |
| H | 4.85160300  | 4.44474500  | 0.26593800  |                          |                |             |             |
| H | 4.10144500  | 5.61000400  | 2.33184800  | <b>9b</b>                |                |             |             |
| C | -1.08459500 | 3.21188800  | -0.68855000 | SCF energy:              | -2965.012568   |             |             |
| C | -1.02091200 | 4.57055900  | -1.04638000 | SCF energy in solution:  | -2964.158859   |             |             |
| C | -2.33190100 | 2.59566700  | -0.51136500 | Free energy in solution: | -2963.52249838 |             |             |
| C | -2.19398000 | 5.30173200  | -1.22361700 | P                        | 5.02836600     | 0.81275300  | -1.42640000 |
| H | -0.05864500 | 5.05988100  | -1.17252100 | C                        | 0.99947900     | -1.84799000 | -0.32198300 |
| C | -3.50305200 | 3.33722100  | -0.69263400 | H                        | 1.43074800     | -1.23178200 | 0.47587700  |
| H | -2.39467900 | 1.54152000  | -0.25072100 | H                        | 1.45980600     | -2.83966700 | -0.22664600 |
| C | -3.43714700 | 4.68464600  | -1.04570600 | C                        | 3.25854500     | 0.31433200  | -1.04959100 |
| H | -2.13920000 | 6.35250600  | -1.49638600 | H                        | 3.15039500     | 0.10039000  | 0.02091700  |
| H | -4.45933700 | 2.84395100  | -0.54840800 | H                        | 2.62458500     | 1.18177500  | -1.27101300 |
| H | -4.35012900 | 5.25909300  | -1.18127100 | C                        | 1.30207000     | -1.22484600 | -1.69650600 |
| P | -3.09757900 | -1.29341000 | 0.54565200  | H                        | 0.70313000     | -0.31391200 | -1.82636500 |

|   |             |             |             |                          |                |             |             |
|---|-------------|-------------|-------------|--------------------------|----------------|-------------|-------------|
| H | 0.98517900  | -1.91391400 | -2.48842500 | H                        | 6.69862400     | -2.18374400 | 2.25948600  |
| C | 2.78946800  | -0.87457700 | -1.90271800 | H                        | 7.81639900     | -3.27468900 | -1.75006800 |
| H | 3.41058500  | -1.75577100 | -1.69269400 | H                        | 7.86699200     | -3.72450100 | 0.69539500  |
| H | 2.94329000  | -0.63495700 | -2.96309400 | P                        | -3.81883900    | -0.03221000 | 0.28313200  |
| P | -0.81335400 | -1.93306600 | 0.11758200  | C                        | -5.86156500    | 1.12420900  | 1.54181400  |
| C | -1.51255500 | -3.30008300 | -0.90205700 | H                        | -6.59223200    | 0.91457100  | 0.75036100  |
| C | -2.89798500 | -3.53790700 | -0.84487100 | H                        | -5.82904600    | 0.25970400  | 2.21073600  |
| C | -0.71278800 | -4.12260100 | -1.71233100 | C                        | -4.46771300    | 0.85858800  | -2.18157600 |
| C | -3.45973000 | -4.57659200 | -1.58803800 | H                        | -4.99196100    | 1.75759200  | -1.83062500 |
| H | -3.52985600 | -2.91714400 | -0.21414000 | H                        | -3.41347700    | 1.12391600  | -2.34092800 |
| C | -1.28409000 | -5.15698700 | -2.45714400 | O                        | -4.15532500    | -1.26943800 | 1.06706400  |
| H | 0.36001700  | -3.97130500 | -1.76865600 | O                        | -4.56395300    | -0.16951300 | -1.18784200 |
| C | -2.65909200 | -5.38530200 | -2.39762900 | O                        | -4.55542500    | 1.30111900  | 0.94222300  |
| H | -4.53115400 | -4.74960300 | -1.53334000 | C                        | -6.21750200    | 2.39651800  | 2.29165300  |
| H | -0.65094000 | -5.78278000 | -3.08079200 | H                        | -5.47645800    | 2.60612300  | 3.07009500  |
| H | -3.10356000 | -6.18963500 | -2.97808700 | H                        | -7.19908600    | 2.28875200  | 2.76786400  |
| C | -0.75303000 | -2.62019900 | 1.82457000  | H                        | -6.25981800    | 3.25708200  | 1.61457400  |
| C | -0.43700300 | -3.96560600 | 2.06759600  | C                        | -5.08851200    | 0.33612200  | -3.46709900 |
| C | -0.98660200 | -1.76565000 | 2.91128200  | H                        | -5.04292200    | 1.10399500  | -4.24829500 |
| C | -0.34408700 | -4.44219500 | 3.37504700  | H                        | -6.13702900    | 0.06402500  | -3.30762400 |
| H | -0.27619200 | -4.64540900 | 1.23531600  | H                        | -4.55344000    | -0.55200400 | -3.81856500 |
| C | -0.89003400 | -2.24393100 | 4.21937000  | Pd                       | -1.60890000    | 0.37717600  | -0.01336600 |
| H | -1.26247600 | -0.73021600 | 2.72989800  | O                        | -0.03412700    | 2.02072200  | -0.33606700 |
| C | -0.56781200 | -3.58153800 | 4.45273800  | C                        | -1.23120200    | 2.31458200  | -0.23481700 |
| H | -0.10212400 | -5.48683000 | 3.55235000  | C                        | -1.73471100    | 3.69345200  | -0.32602800 |
| H | -1.07947600 | -1.57356400 | 5.05334000  | C                        | -3.08591700    | 3.97630000  | -0.07862600 |
| H | -0.49939500 | -3.95581300 | 5.47078500  | C                        | -0.84559300    | 4.73207500  | -0.66777200 |
| C | 5.32857300  | 2.13502000  | -0.16364200 | C                        | -3.54287600    | 5.29103400  | -0.17163600 |
| C | 6.65567700  | 2.55671900  | 0.04102300  | H                        | -3.75192800    | 3.16599700  | 0.19983200  |
| C | 4.30711300  | 2.80426600  | 0.52901700  | C                        | -1.31138000    | 6.03782100  | -0.76559700 |
| C | 6.95299800  | 3.59565900  | 0.92040700  | H                        | 0.19696900     | 4.49449000  | -0.85465900 |
| H | 7.46492300  | 2.05997400  | -0.48942500 | C                        | -2.66110600    | 6.31751000  | -0.51674800 |
| C | 4.60509500  | 3.85267400  | 1.40513700  | H                        | -4.58748300    | 5.51541700  | 0.02562600  |
| H | 3.26896100  | 2.51647400  | 0.39540900  | H                        | -0.62940600    | 6.83999700  | -1.03370400 |
| C | 5.92614000  | 4.25005200  | 1.60699700  | H                        | -3.02266800    | 7.33980000  | -0.59228400 |
| H | 7.98679200  | 3.89798100  | 1.06753900  |                          |                |             |             |
| H | 3.79776700  | 4.35411400  | 1.93319900  |                          |                |             |             |
| H | 6.15581100  | 5.06346300  | 2.29016300  | <b>TS7b</b>              |                |             |             |
| C | 5.94956300  | -0.61849500 | -0.68259300 | SCF energy:              | -2964.977916   |             |             |
| C | 5.98958500  | -0.88355000 | 0.69683900  | SCF energy in solution:  | -2964.14035212 |             |             |
| C | 6.61917500  | -1.49260800 | -1.55244900 | Free energy in solution: | -2963.50242612 |             |             |
| C | 6.67480500  | -1.99404000 | 1.18926700  | P                        | -3.00659900    | -1.10984100 | -0.54046300 |
| H | 5.49242200  | -0.20943200 | 1.38942300  | C                        | 0.71773400     | -2.15842900 | -1.60686600 |
| C | 7.30266700  | -2.60858400 | -1.06158200 | H                        | 0.10049300     | -1.59752500 | -2.31757700 |
| H | 6.60829200  | -1.29301400 | -2.62132100 | H                        | 1.23658200     | -2.95113700 | -2.16061700 |
| C | 7.33157800  | -2.86053800 | 0.31022400  | C                        | -2.49564500    | -2.57730400 | -1.61605900 |

|   |             |             |             |                          |                |             |             |
|---|-------------|-------------|-------------|--------------------------|----------------|-------------|-------------|
| H | -3.37572400 | -3.18753500 | -1.85376800 | H                        | -5.20023800    | -3.03747400 | 0.24666800  |
| H | -2.13587000 | -2.15899100 | -2.56490200 | C                        | -3.02215300    | -2.35424100 | 3.38171200  |
| C | -0.14600600 | -2.77024200 | -0.48654500 | H                        | -1.87073700    | -1.03263000 | 2.14259800  |
| H | -0.42553100 | -1.99666900 | 0.23759500  | C                        | -4.09830900    | -3.23781600 | 3.45865300  |
| H | 0.46104900  | -3.49495900 | 0.06707900  | H                        | -5.72087100    | -4.17069700 | 2.38035300  |
| C | -1.41727300 | -3.47870200 | -0.98616800 | H                        | -2.40848500    | -2.15415500 | 4.25574600  |
| H | -1.14306700 | -4.25189500 | -1.71867400 | H                        | -4.33280100    | -3.73338700 | 4.39756000  |
| H | -1.86032100 | -4.00708500 | -0.13404900 | P                        | 1.03221600     | 0.91708200  | 2.07391400  |
| P | 1.95812500  | -0.94400200 | -0.93504800 | C                        | 3.04856300     | 0.64582600  | 3.82055500  |
| C | 3.03270000  | -1.98188300 | 0.14437100  | H                        | 2.71765800     | 1.45528000  | 4.48494800  |
| C | 2.64222000  | -2.24594000 | 1.46789900  | H                        | 2.55291500     | -0.27497100 | 4.14766100  |
| C | 4.19992600  | -2.57761200 | -0.36155800 | C                        | 1.14769600     | 3.51764100  | 2.76270400  |
| C | 3.40969800  | -3.10170000 | 2.26126000  | H                        | 2.15826100     | 3.44448800  | 3.18586700  |
| H | 1.75568600  | -1.77767700 | 1.88847900  | H                        | 1.24902500     | 3.78565900  | 1.70278200  |
| C | 4.96475500  | -3.42430800 | 0.44180400  | O                        | 0.32576300     | -0.27040600 | 2.69328800  |
| H | 4.51616500  | -2.38170800 | -1.38109700 | O                        | 0.47902800     | 2.25922600  | 2.89347300  |
| C | 4.57029800  | -3.68958300 | 1.75446000  | O                        | 2.65240300     | 0.94340500  | 2.46858300  |
| H | 3.09765300  | -3.30072700 | 3.28296900  | C                        | 4.56119300     | 0.50092300  | 3.85560000  |
| H | 5.86781800  | -3.87579000 | 0.03943100  | H                        | 4.88278700     | -0.32183300 | 3.20891200  |
| H | 5.16645200  | -4.34937400 | 2.37951900  | H                        | 4.89991000     | 0.29334400  | 4.87792700  |
| C | 3.04607500  | -0.48045500 | -2.34388800 | H                        | 5.04746400     | 1.42045100  | 3.51154300  |
| C | 4.05180100  | 0.47453100  | -2.10826800 | C                        | 0.33219300     | 4.56966900  | 3.49852500  |
| C | 2.88772000  | -0.99260900 | -3.63880300 | H                        | 0.83125500     | 5.54482700  | 3.44458600  |
| C | 4.88424900  | 0.89604100  | -3.14319100 | H                        | 0.21564100     | 4.29694000  | 4.55275200  |
| H | 4.18027300  | 0.88765200  | -1.11065500 | H                        | -0.66406400    | 4.66287700  | 3.05514500  |
| C | 3.71821800  | -0.56043400 | -4.67703700 | Pd                       | 0.79672100     | 1.00479200  | -0.28888900 |
| H | 2.11684400  | -1.72590200 | -3.85145400 | O                        | -0.36409300    | 1.57592500  | -3.06719000 |
| C | 4.71745100  | 0.38085800  | -4.43221900 | C                        | 0.01784800     | 1.53402900  | -1.96083800 |
| H | 5.65939600  | 1.63130600  | -2.94498300 | C                        | -0.42562900    | 2.82667900  | -0.72500400 |
| H | 3.58034200  | -0.96309100 | -5.67684000 | C                        | 0.25753700     | 4.04149500  | -0.90375000 |
| H | 5.36193900  | 0.71501900  | -5.24063000 | C                        | -1.73940000    | 2.82628900  | -0.23064700 |
| C | -4.64023500 | -0.66704200 | -1.28816700 | C                        | -0.36443300    | 5.24553900  | -0.57355600 |
| C | -5.60821000 | -0.01939900 | -0.49815800 | H                        | 1.26506100     | 4.04352200  | -1.31221100 |
| C | -4.90765600 | -0.83020000 | -2.65763100 | C                        | -2.35430900    | 4.03410300  | 0.10130600  |
| C | -6.80524800 | 0.43006600  | -1.05392600 | H                        | -2.27092500    | 1.88627400  | -0.11337400 |
| H | -5.42913700 | 0.12059500  | 0.56477300  | C                        | -1.66881900    | 5.24049400  | -0.06920700 |
| C | -6.10545200 | -0.37576400 | -3.21507400 | H                        | 0.16368600     | 6.18531000  | -0.71212100 |
| H | -4.18174100 | -1.31501400 | -3.30369200 | H                        | -3.36901200    | 4.03393900  | 0.49010300  |
| C | -7.06007600 | 0.25376100  | -2.41640100 | H                        | -2.15439900    | 6.17948300  | 0.18316600  |
| H | -7.54157600 | 0.91829400  | -0.42034800 |                          |                |             |             |
| H | -6.29059100 | -0.51812000 | -4.27688000 |                          |                |             |             |
| H | -7.99253900 | 0.60519800  | -2.84994400 | <b>10b</b>               |                |             |             |
| C | -3.49818500 | -1.95515700 | 1.03164000  | SCF energy:              | -2964.999502   |             |             |
| C | -4.58101600 | -2.84862100 | 1.12007400  | SCF energy in solution:  | -2964.16588812 |             |             |
| C | -2.72119400 | -1.71118500 | 2.17647200  | Free energy in solution: | -2963.52390412 |             |             |
| C | -4.87943400 | -3.48424100 | 2.32463500  | P                        | 2.86890200     | -1.22103300 | -0.29120500 |

|   |             |             |             |             |              |             |             |
|---|-------------|-------------|-------------|-------------|--------------|-------------|-------------|
| C | -0.56197300 | -2.79486200 | 0.00463800  | C           | 3.47008200   | -0.73581000 | -1.97681600 |
| H | 0.16135700  | -2.73553800 | 0.82569000  | C           | 4.72250700   | -1.12056900 | -2.48389600 |
| H | -1.04678800 | -3.77751900 | 0.05541600  | C           | 2.62284100   | 0.04464800  | -2.78167100 |
| C | 2.58326900  | -3.06622500 | -0.51784600 | C           | 5.11647600   | -0.73999400 | -3.76645600 |
| H | 3.49967800  | -3.56707000 | -0.85386500 | H           | 5.39766600   | -1.70848000 | -1.86726100 |
| H | 2.35334100  | -3.46429000 | 0.47954500  | C           | 3.01791000   | 0.42003900  | -4.06930600 |
| C | 0.14133500  | -2.61580500 | -1.35467400 | H           | 1.65024300   | 0.36646500  | -2.41477400 |
| H | 0.34712200  | -1.55367100 | -1.52629600 | C           | 4.26318800   | 0.03009700  | -4.56261100 |
| H | -0.54559700 | -2.92202300 | -2.15148000 | H           | 6.09056100   | -1.04094300 | -4.14440700 |
| C | 1.45281500  | -3.40698000 | -1.51098000 | H           | 2.34916800   | 1.02341800  | -4.67713000 |
| H | 1.24683900  | -4.48466200 | -1.44153500 | H           | 4.57280900   | 0.32809800  | -5.56114800 |
| H | 1.81993300  | -3.23037300 | -2.52919700 | P           | -1.45155100  | 1.81571800  | -1.09100700 |
| P | -1.80927800 | -1.44222000 | 0.31514700  | C           | -3.93962300  | 2.06068100  | -2.04230400 |
| C | -3.09285400 | -1.78615500 | -0.96618000 | H           | -3.77934400  | 3.12543000  | -2.25231100 |
| C | -2.90578700 | -1.31701900 | -2.27753500 | H           | -3.65550800  | 1.49609100  | -2.93655300 |
| C | -4.21751100 | -2.57373900 | -0.67350800 | C           | -1.93609900  | 4.30957400  | -0.19646500 |
| C | -3.82479500 | -1.64877200 | -3.27520800 | H           | -3.00428200  | 4.37252900  | -0.44183200 |
| H | -2.06640500 | -0.66958200 | -2.51617100 | H           | -1.84441000  | 3.89192600  | 0.81226300  |
| C | -5.13701400 | -2.89210600 | -1.67479500 | O           | -0.91487600  | 1.27057900  | -2.39005400 |
| H | -4.38091900 | -2.93979200 | 0.33499600  | O           | -1.28629100  | 3.45211300  | -1.14831300 |
| C | -4.94084500 | -2.43409300 | -2.97867800 | O           | -3.09755600  | 1.65543800  | -0.94171300 |
| H | -3.66847300 | -1.28079200 | -4.28579000 | C           | -5.38461300  | 1.79143500  | -1.65872400 |
| H | -6.00519900 | -3.49963700 | -1.43289800 | H           | -5.53980700  | 0.72528000  | -1.46526400 |
| H | -5.65629800 | -2.68397500 | -3.75778000 | H           | -6.05379400  | 2.09725000  | -2.47176500 |
| C | -2.63219600 | -1.87408000 | 1.90375200  | H           | -5.65857400  | 2.35140700  | -0.75781800 |
| C | -3.47221500 | -0.90264300 | 2.47820000  | C           | -1.28020800  | 5.67867700  | -0.26586400 |
| C | -2.43625300 | -3.08633500 | 2.58087400  | H           | -1.78485000  | 6.37274200  | 0.41692400  |
| C | -4.10797100 | -1.14549700 | 3.69494400  | H           | -1.34246000  | 6.08416500  | -1.28135500 |
| H | -3.62190500 | 0.04590600  | 1.96799500  | H           | -0.22629300  | 5.61210600  | 0.01902200  |
| C | -3.06590500 | -3.32236700 | 3.80637100  | Pd          | -0.58228500  | 0.66194500  | 0.73817900  |
| H | -1.79270900 | -3.85318700 | 2.16160300  | O           | 0.97893600   | -0.52885400 | 3.17204900  |
| C | -3.90321600 | -2.35561700 | 4.36368100  | C           | 0.39480000   | -0.15067400 | 2.26576900  |
| H | -4.75601700 | -0.38669900 | 4.12495400  | C           | 0.51513600   | 2.36951500  | 1.20340500  |
| H | -2.90127600 | -4.26457600 | 4.32215300  | C           | 0.25478300   | 3.09362100  | 2.37657900  |
| H | -4.39162800 | -2.54165900 | 5.31627800  | C           | 1.60140700   | 2.75976900  | 0.40622500  |
| C | 4.41626700  | -1.17701800 | 0.72285200  | C           | 1.05227100   | 4.18632500  | 2.73967400  |
| C | 4.84013400  | 0.09051900  | 1.16499300  | H           | -0.57489100  | 2.81314100  | 3.02237500  |
| C | 5.15069600  | -2.30174000 | 1.13047500  | C           | 2.40223700   | 3.84749500  | 0.77187900  |
| C | 5.97376600  | 0.22950000  | 1.96367100  | H           | 1.82394900   | 2.22894000  | -0.51512000 |
| H | 4.27030900  | 0.97447800  | 0.88721300  | C           | 2.13076300   | 4.56537000  | 1.93938100  |
| C | 6.28038600  | -2.16336400 | 1.94232300  | H           | 0.82890600   | 4.73505100  | 3.65213700  |
| H | 4.84907000  | -3.29768000 | 0.82150700  | H           | 3.23454600   | 4.13755700  | 0.13419400  |
| C | 6.69853100  | -0.89904200 | 2.35652200  | H           | 2.75295500   | 5.41111000  | 2.22118600  |
| H | 6.28492900  | 1.21867400  | 2.28930200  |             |              |             |             |
| H | 6.83376700  | -3.04796200 | 2.24791700  | <b>TS8b</b> |              |             |             |
| H | 7.57743600  | -0.79287400 | 2.98693600  | SCF energy: | -2964.989202 |             |             |

|                          |              |             |             |    |             |             |             |
|--------------------------|--------------|-------------|-------------|----|-------------|-------------|-------------|
| SCF energy in solution:  | -2964.169532 |             |             | H  | 6.62091200  | 0.68962100  | 0.39813900  |
| Free energy in solution: | -2963.52572  |             |             | H  | 4.71490100  | 0.92593600  | 4.24725800  |
| P                        | 2.02719600   | -1.27578600 | 0.70100300  | H  | 6.67585200  | 1.39276500  | 2.78479800  |
| C                        | -1.27709100  | -2.31027900 | 1.89996600  | C  | 2.60205900  | -2.25573300 | -0.75583600 |
| H                        | -0.66581200  | -1.91068600 | 2.71614400  | C  | 3.67628900  | -3.15962200 | -0.67312100 |
| H                        | -2.14224400  | -2.80173900 | 2.35783900  | C  | 1.91345800  | -2.13008400 | -1.97262900 |
| C                        | 1.82699200   | -2.62234100 | 2.01046900  | C  | 4.05128400  | -3.92020400 | -1.77997700 |
| H                        | 2.81302900   | -3.04010700 | 2.24416400  | H  | 4.23084300  | -3.26163400 | 0.25609300  |
| H                        | 1.49251900   | -2.10781700 | 2.91892300  | C  | 2.29291000  | -2.89321500 | -3.08133800 |
| C                        | -0.47701100  | -3.31657400 | 1.03728700  | H  | 1.08579900  | -1.43115300 | -2.06978700 |
| H                        | -0.26493900  | -2.89378400 | 0.04840700  | C  | 3.35826400  | -3.78828000 | -2.98729500 |
| H                        | -1.09687700  | -4.19940500 | 0.84713600  | H  | 4.88447600  | -4.61396200 | -1.70155900 |
| C                        | 0.85716600   | -3.76267200 | 1.65512300  | H  | 1.75274700  | -2.77750500 | -4.01692900 |
| H                        | 0.67163000   | -4.34987400 | 2.56556100  | H  | 3.65241100  | -4.38033700 | -3.85009100 |
| H                        | 1.34803300   | -4.43923400 | 0.94557200  | P  | -0.89003300 | 1.18139900  | -1.82871900 |
| P                        | -1.86326600  | -0.85233000 | 0.89522100  | C  | -3.38899000 | 1.34114000  | -2.73393500 |
| C                        | -3.01228000  | -1.71430500 | -0.26951500 | H  | -3.13022300 | 2.23967600  | -3.30718300 |
| C                        | -2.62651400  | -1.97495600 | -1.59235800 | H  | -3.20248800 | 0.47008000  | -3.36978400 |
| C                        | -4.24940700  | -2.19573300 | 0.19045200  | C  | -0.93061200 | 3.85151300  | -1.56491300 |
| C                        | -3.46203900  | -2.71624700 | -2.43281400 | H  | -2.02086400 | 3.98461700  | -1.55499000 |
| H                        | -1.70184700  | -1.56698600 | -1.98929300 | H  | -0.60052400 | 3.68529000  | -0.53185900 |
| C                        | -5.08202900  | -2.92965600 | -0.65473600 | O  | -0.55659700 | 0.23569400  | -2.95477300 |
| H                        | -4.57030200  | -1.99120300 | 1.20815400  | O  | -0.60344800 | 2.71144800  | -2.37074200 |
| C                        | -4.68749000  | -3.19534200 | -1.96844000 | O  | -2.53712700 | 1.26034200  | -1.56752500 |
| H                        | -3.15310100  | -2.90534400 | -3.45735300 | C  | -4.83585600 | 1.38430600  | -2.27263400 |
| H                        | -6.03871500  | -3.29152200 | -0.28689300 | H  | -5.08736900 | 0.48513400  | -1.70115300 |
| H                        | -5.33662900  | -3.76641000 | -2.62711200 | H  | -5.50350800 | 1.44008200  | -3.14062900 |
| C                        | -2.99500300  | 0.05151600  | 2.04052000  | H  | -5.02247900 | 2.26137100  | -1.64262800 |
| C                        | -3.65537800  | 1.19671300  | 1.55946600  | C  | -0.23433000 | 5.06636900  | -2.15600100 |
| C                        | -3.18312700  | -0.32417100 | 3.37971400  | H  | -0.49281000 | 5.96516800  | -1.58324900 |
| C                        | -4.49076800  | 1.93393200  | 2.39732300  | H  | -0.53961600 | 5.21834900  | -3.19674100 |
| H                        | -3.50415500  | 1.50577300  | 0.52997200  | H  | 0.85125700  | 4.93272500  | -2.12816100 |
| C                        | -4.01572400  | 0.42312400  | 4.21781700  | Pd | 0.05661000  | 0.58552200  | 0.20598900  |
| H                        | -2.68451300  | -1.19799100 | 3.78584500  | O  | -0.26158400 | 2.26543500  | 2.89243600  |
| C                        | -4.67300600  | 1.55135200  | 3.72897200  | C  | 0.01085600  | 1.45931000  | 2.12231800  |
| H                        | -4.99613700  | 2.81482100  | 2.01015000  | C  | 1.62748900  | 1.79935400  | -0.47101500 |
| H                        | -4.14804800  | 0.11839900  | 5.25264400  | C  | 2.09209100  | 2.88493400  | 0.28876100  |
| H                        | -5.31982500  | 2.13188300  | 4.38128300  | C  | 2.29728400  | 1.51096400  | -1.67148500 |
| C                        | 3.55649700   | -0.46639800 | 1.35024200  | C  | 3.19512100  | 3.64143800  | -0.12525300 |
| C                        | 4.66170000   | -0.18473600 | 0.53354900  | H  | 1.60766700  | 3.16578100  | 1.21809400  |
| C                        | 3.59084700   | -0.04433200 | 2.69094300  | C  | 3.40217200  | 2.26322300  | -2.08294500 |
| C                        | 5.77601800   | 0.48012500  | 1.04880600  | H  | 1.94141700  | 0.71844400  | -2.32037300 |
| H                        | 4.65342600   | -0.47885600 | -0.51016600 | C  | 3.85875700  | 3.33302900  | -1.31220600 |
| C                        | 4.70718600   | 0.61479600  | 3.20575500  | H  | 3.53008900  | 4.47398000  | 0.48990800  |
| H                        | 2.74062400   | -0.22380500 | 3.34385300  | H  | 3.89362600  | 2.01504900  | -3.02131800 |
| C                        | 5.80646200   | 0.87709600  | 2.38583200  | H  | 4.71385900  | 3.92167500  | -1.63516200 |

|                                       |             |             |             |    |             |             |             |
|---------------------------------------|-------------|-------------|-------------|----|-------------|-------------|-------------|
|                                       |             |             |             | H  | -5.07578700 | -1.15011000 | -0.12772100 |
|                                       |             |             |             | C  | -6.50206100 | 1.32459400  | 2.48637700  |
| <b>11b</b>                            |             |             |             | H  | -4.81292500 | 2.56575400  | 2.04164400  |
| SCF energy: -2964.999270              |             |             |             | C  | -7.17782400 | 0.13541100  | 2.21589200  |
| SCF energy in solution: -2964.164909  |             |             |             | H  | -7.17253100 | -1.68269300 | 1.05211400  |
| Free energy in solution: -2963.527334 |             |             |             | H  | -6.89671700 | 2.02130200  | 3.22180800  |
| P                                     | -3.15535400 | 1.02308800  | 0.02072600  | H  | -8.10017900 | -0.10216900 | 2.73909400  |
| C                                     | 0.24128300  | 2.72700000  | 0.56767700  | C  | -3.60070400 | 0.86573100  | -1.77137300 |
| H                                     | -0.43039800 | 2.42405500  | 1.37896000  | C  | -4.77789200 | 1.40087800  | -2.32242700 |
| H                                     | 0.63631000  | 3.72124500  | 0.81131000  | C  | -2.70127700 | 0.19759500  | -2.61831400 |
| C                                     | -2.94000200 | 2.88787400  | 0.19329600  | C  | -5.04531500 | 1.27437000  | -3.68526400 |
| H                                     | -3.89312200 | 3.40073200  | 0.01356400  | H  | -5.49371500 | 1.90706900  | -1.67969600 |
| H                                     | -2.67766300 | 3.07197600  | 1.24338800  | C  | -2.96804800 | 0.07477600  | -3.98515900 |
| C                                     | -0.51098500 | 2.76447300  | -0.77560900 | H  | -1.78357600 | -0.22798100 | -2.21889000 |
| H                                     | -0.66419900 | 1.74195900  | -1.13871400 | C  | -4.13930600 | 0.61175900  | -4.51950400 |
| H                                     | 0.12280500  | 3.25645000  | -1.52162000 | H  | -5.96110500 | 1.69094800  | -4.09745300 |
| C                                     | -1.86798300 | 3.48915600  | -0.73638800 | H  | -2.25816200 | -0.44439100 | -4.62315700 |
| H                                     | -1.71666600 | 4.54071100  | -0.45313900 | H  | -4.35007000 | 0.51316600  | -5.58132100 |
| H                                     | -2.26222000 | 3.50094700  | -1.75949300 | P  | 1.74002400  | -1.57449400 | -1.30986500 |
| P                                     | 1.62744200  | 1.47833000  | 0.52974000  | C  | 4.24388400  | -1.27584700 | -2.20594700 |
| C                                     | 2.75527900  | 2.19885200  | -0.74023200 | H  | 4.29958900  | -2.32197900 | -2.53188600 |
| C                                     | 2.57634200  | 1.87593600  | -2.09537700 | H  | 3.85376700  | -0.68400500 | -3.04041400 |
| C                                     | 3.73838400  | 3.13505300  | -0.38048200 | C  | 2.61755600  | -4.04532800 | -0.68892700 |
| C                                     | 3.36535900  | 2.49323800  | -3.06906200 | H  | 3.68519500  | -3.89720800 | -0.89701800 |
| H                                     | 1.85227000  | 1.12086700  | -2.39052900 | H  | 2.43638300  | -3.77920400 | 0.35856200  |
| C                                     | 4.52859600  | 3.74027400  | -1.35907300 | O  | 1.14023100  | -0.97366800 | -2.55458800 |
| H                                     | 3.89350700  | 3.39152800  | 0.66300400  | O  | 1.84871800  | -3.19731000 | -1.55665100 |
| C                                     | 4.34132800  | 3.42327900  | -2.70599800 | O  | 3.33706300  | -1.16923100 | -1.08713800 |
| H                                     | 3.21893600  | 2.23416300  | -4.11428100 | C  | 5.60498500  | -0.76774300 | -1.76255800 |
| H                                     | 5.28918300  | 4.45953800  | -1.06663200 | H  | 5.54115100  | 0.28039100  | -1.45322900 |
| H                                     | 4.95660600  | 3.89553900  | -3.46742000 | H  | 6.32324000  | -0.84252300 | -2.58761800 |
| C                                     | 2.54228400  | 1.68938600  | 2.11202200  | H  | 5.98510300  | -1.35709100 | -0.92077000 |
| C                                     | 3.61085000  | 0.80782300  | 2.36042300  | C  | 2.20675900  | -5.48526100 | -0.94845900 |
| C                                     | 2.19800700  | 2.63215100  | 3.09143800  | H  | 2.80750500  | -6.16497300 | -0.33228000 |
| C                                     | 4.32156600  | 0.87889200  | 3.55738500  | H  | 2.35902200  | -5.74530700 | -2.00140600 |
| H                                     | 3.88145500  | 0.06750500  | 1.61147200  | H  | 1.15103600  | -5.63103200 | -0.70244500 |
| C                                     | 2.90701200  | 2.69304200  | 4.29492300  | Pd | 0.67408600  | -0.79917400 | 0.61397400  |
| H                                     | 1.37821000  | 3.32453100  | 2.92724800  | O  | -1.05689300 | -0.19281900 | 3.14581000  |
| C                                     | 3.96893700  | 1.81975900  | 4.52937000  | C  | -0.43321300 | -0.34951800 | 2.20133000  |
| H                                     | 5.14670600  | 0.19441600  | 3.73461700  | C  | -0.16449200 | -2.69388600 | 0.80934500  |
| H                                     | 2.62747400  | 3.42678800  | 5.04618800  | C  | 0.17721700  | -3.51830000 | 1.89201900  |
| H                                     | 4.51866600  | 1.86915800  | 5.46531100  | C  | -1.15667500 | -3.13342300 | -0.07833400 |
| C                                     | -4.78448600 | 0.75411100  | 0.85454100  | C  | -0.44805100 | -4.75760900 | 2.07630000  |
| C                                     | -5.47083400 | -0.44856800 | 0.60275800  | H  | 0.93575300  | -3.20191900 | 2.60518600  |
| C                                     | -5.31680900 | 1.63193200  | 1.81213500  | C  | -1.78613900 | -4.36847100 | 0.10932700  |
| C                                     | -6.65635100 | -0.75109000 | 1.26930900  | H  | -1.43689300 | -2.52310900 | -0.93242900 |

|                                         |             |             |             |    |             |             |             |
|-----------------------------------------|-------------|-------------|-------------|----|-------------|-------------|-------------|
| C                                       | -1.43358900 | -5.18594900 | 1.18576800  | C  | 3.43597000  | -0.57082900 | 1.35810400  |
| H                                       | -0.16530200 | -5.38218300 | 2.92100700  | C  | 4.53091500  | -0.02872200 | 0.66986200  |
| H                                       | -2.54966800 | -4.69268000 | -0.59435400 | C  | 3.42708700  | -0.51482100 | 2.76187300  |
| H                                       | -1.92312700 | -6.14592000 | 1.32925000  | C  | 5.59815400  | 0.53602500  | 1.36969900  |
|                                         |             |             |             | H  | 4.54617100  | -0.03197500 | -0.41431200 |
| <b>12b</b>                              |             |             |             | C  | 4.49609300  | 0.04836700  | 3.45933200  |
| SCF energy: -2851.682566                |             |             |             | H  | 2.58200200  | -0.90526100 | 3.32290000  |
| SCF energy in solution: -2850.88366208  |             |             |             | C  | 5.58761400  | 0.57253100  | 2.76447300  |
| Free energy in solution: -2850.24335708 |             |             |             | H  | 6.43591100  | 0.95466900  | 0.81875300  |
|                                         |             |             |             | H  | 4.47318700  | 0.07835800  | 4.54556400  |
| P                                       | 1.97659300  | -1.27287300 | 0.47273400  | H  | 6.42006400  | 1.01277400  | 3.30678400  |
| C                                       | -1.27236400 | -2.82417600 | 1.30527400  | C  | 2.63283900  | -1.86549300 | -1.14783400 |
| H                                       | -0.70887300 | -2.71121700 | 2.23672600  | C  | 3.77810900  | -2.67797600 | -1.21966900 |
| H                                       | -2.18111400 | -3.38358900 | 1.55036000  | C  | 1.94400000  | -1.55587000 | -2.33111900 |
| C                                       | 1.79892100  | -2.89453600 | 1.41303000  | C  | 4.22386800  | -3.16784200 | -2.44686400 |
| H                                       | 2.80869300  | -3.27601600 | 1.60175100  | H  | 4.33328900  | -2.91984000 | -0.31710600 |
| H                                       | 1.38353500  | -2.63855200 | 2.39414900  | C  | 2.39232200  | -2.05063600 | -3.55910900 |
| C                                       | -0.42976400 | -3.56830600 | 0.24184400  | H  | 1.06225400  | -0.91982800 | -2.30114500 |
| H                                       | -0.30000600 | -2.94493400 | -0.65124900 | C  | 3.52971300  | -2.85569000 | -3.61941400 |
| H                                       | -0.96946800 | -4.45859700 | -0.09922700 | H  | 5.11271900  | -3.79198300 | -2.48784400 |
| C                                       | 0.96008200  | -3.99631600 | 0.74145600  | H  | 1.84996300  | -1.79692200 | -4.46561500 |
| H                                       | 0.85358400  | -4.81529700 | 1.46668200  | H  | 3.87829800  | -3.23754500 | -4.57539200 |
| H                                       | 1.52231500  | -4.40505200 | -0.10604600 | P  | -1.09377100 | 1.58694300  | -1.47111800 |
| P                                       | -1.75065400 | -1.11028400 | 0.73843900  | C  | -3.67583200 | 2.08721100  | -1.94033600 |
| C                                       | -3.14555300 | -1.54565700 | -0.39422800 | H  | -3.45413100 | 3.11453300  | -2.25574200 |
| C                                       | -2.96643500 | -1.48611500 | -1.78374000 | H  | -3.60976700 | 1.44233500  | -2.82238700 |
| C                                       | -4.36554900 | -2.01330900 | 0.12050700  | C  | -0.96089200 | 4.07675800  | -0.48215500 |
| C                                       | -3.98940200 | -1.90385900 | -2.64020900 | H  | -2.03936800 | 4.21143000  | -0.32212400 |
| H                                       | -2.05693000 | -1.06835800 | -2.20531600 | H  | -0.53522400 | 3.63601800  | 0.42849900  |
| C                                       | -5.38623200 | -2.42125100 | -0.73824000 | O  | -0.96483500 | 0.98840800  | -2.84892100 |
| H                                       | -4.52530000 | -2.04813000 | 1.19505700  | O  | -0.75463900 | 3.19866200  | -1.59582800 |
| C                                       | -5.19752200 | -2.37198100 | -2.12224700 | O  | -2.68784500 | 1.66257900  | -0.97665500 |
| H                                       | -3.84034300 | -1.84616400 | -3.71506800 | C  | -5.04738400 | 1.99645100  | -1.29261900 |
| H                                       | -6.32839000 | -2.77457800 | -0.32697800 | H  | -5.25923800 | 0.96877800  | -0.98094300 |
| H                                       | -5.99294400 | -2.68925200 | -2.79162600 | H  | -5.82059700 | 2.31010900  | -2.00411800 |
| C                                       | -2.56629800 | -0.38447500 | 2.23167200  | H  | -5.10984300 | 2.64531000  | -0.41173500 |
| C                                       | -3.00326400 | 0.95164000  | 2.17625000  | C  | -0.28509400 | 5.40288600  | -0.79090000 |
| C                                       | -2.73390000 | -1.09754200 | 3.43022600  | H  | -0.45682300 | 6.11402500  | 0.02626400  |
| C                                       | -3.59081600 | 1.55041000  | 3.29038500  | H  | -0.68560100 | 5.83288300  | -1.71520300 |
| H                                       | -2.89283200 | 1.51133900  | 1.25323800  | H  | 0.79298300  | 5.26144700  | -0.91160500 |
| C                                       | -3.31810500 | -0.49109400 | 4.54567000  | Pd | 0.12820200  | 0.26247300  | -0.00153900 |
| H                                       | -2.41662200 | -2.13189500 | 3.50848700  | C  | 1.60577900  | 1.68251300  | -0.31877600 |
| C                                       | -3.74664900 | 0.83427300  | 4.47967200  | C  | 1.98175200  | 2.45637200  | 0.79214300  |
| H                                       | -3.92474700 | 2.58294600  | 3.22893900  | C  | 2.25434100  | 1.92231300  | -1.53863000 |
| H                                       | -3.43808200 | -1.05986100 | 5.46414800  | C  | 2.98074500  | 3.43073700  | 0.69023000  |
| H                                       | -4.19942300 | 1.30589900  | 5.34781200  | H  | 1.50017900  | 2.29993300  | 1.75556800  |

|                                         |             |             |             |    |             |             |             |
|-----------------------------------------|-------------|-------------|-------------|----|-------------|-------------|-------------|
| C                                       | 3.26141500  | 2.88885000  | -1.64075300 | H  | -3.88425000 | -2.22877000 | 5.05009200  |
| H                                       | 1.95432400  | 1.37944900  | -2.42987500 | H  | -4.62176500 | 0.13109600  | 5.31924500  |
| C                                       | 3.62936800  | 3.64734200  | -0.52767100 | C  | 3.49362200  | -0.61896000 | 1.26578400  |
| H                                       | 3.25260000  | 4.01615400  | 1.56626400  | C  | 4.73373700  | -0.23162400 | 0.73778800  |
| H                                       | 3.74634700  | 3.05734700  | -2.60017500 | C  | 3.26541100  | -0.43628400 | 2.64155400  |
| H                                       | 4.40780200  | 4.40226800  | -0.60905700 | C  | 5.72493000  | 0.30084900  | 1.56622300  |
|                                         |             |             |             | H  | 4.93143500  | -0.34468800 | -0.32292600 |
|                                         |             |             |             | C  | 4.25850700  | 0.08562200  | 3.46892500  |
| <b>TS9b</b>                             |             |             |             | H  | 2.29869000  | -0.69218800 | 3.06970900  |
| SCF energy: -2851.653840                |             |             |             | C  | 5.49464900  | 0.45549300  | 2.93315500  |
| SCF energy in solution: -2850.85755851  |             |             |             | H  | 6.68022900  | 0.59370100  | 1.13778800  |
| Free energy in solution: -2850.21875251 |             |             |             | H  | 4.06308500  | 0.21217700  | 4.53074100  |
| P                                       | 2.10192200  | -1.29390700 | 0.25147000  | H  | 6.26830600  | 0.86686400  | 3.57609800  |
| C                                       | -1.15214600 | -3.13382700 | 0.89954700  | C  | 2.83289500  | -1.64143100 | -1.40854900 |
| H                                       | -0.62274800 | -3.12740700 | 1.85914400  | C  | 3.93154900  | -2.50155600 | -1.58510200 |
| H                                       | -2.02187000 | -3.78884600 | 1.02024200  | C  | 2.23947500  | -1.05909100 | -2.54074600 |
| C                                       | 1.99257100  | -3.01737200 | 1.00542100  | C  | 4.42999300  | -2.76654900 | -2.86066500 |
| H                                       | 3.00753800  | -3.40116800 | 1.16378400  | H  | 4.40721300  | -2.96234500 | -0.72297800 |
| H                                       | 1.56660500  | -2.86719400 | 2.00484200  | C  | 2.74199700  | -1.32655100 | -3.81793000 |
| C                                       | -0.23122600 | -3.64844400 | -0.23457900 | H  | 1.37810900  | -0.40245100 | -2.43140500 |
| H                                       | -0.13316600 | -2.88812000 | -1.01895100 | C  | 3.83536700  | -2.17750300 | -3.98035500 |
| H                                       | -0.70097100 | -4.51175600 | -0.71989100 | H  | 5.28041300  | -3.43292200 | -2.98092000 |
| C                                       | 1.17794100  | -4.06563700 | 0.22322400  | H  | 2.27076900  | -0.86748100 | -4.68274500 |
| H                                       | 1.10277100  | -4.96120700 | 0.85678400  | H  | 4.22354900  | -2.38517800 | -4.97420100 |
| H                                       | 1.74790900  | -4.36627600 | -0.66435000 | P  | -0.76584600 | 1.89285400  | -1.24171200 |
| P                                       | -1.71608600 | -1.37729600 | 0.58954500  | C  | -3.38379200 | 2.37674300  | -1.54191100 |
| C                                       | -3.04474400 | -1.66072000 | -0.66942000 | H  | -3.20531000 | 3.41510600  | -1.84120900 |
| C                                       | -2.81441100 | -1.27853500 | -1.99979900 | H  | -3.36288000 | 1.75463100  | -2.44244700 |
| C                                       | -4.25586400 | -2.29116800 | -0.33921600 | C  | -0.85786200 | 4.59675900  | -0.80009300 |
| C                                       | -3.77484000 | -1.54061200 | -2.98224700 | H  | -1.79113800 | 4.45020400  | -0.23962400 |
| H                                       | -1.90368100 | -0.74738600 | -2.26389100 | H  | -0.03882400 | 4.66632800  | -0.07471600 |
| C                                       | -5.21406100 | -2.54372900 | -1.32086700 | O  | -0.56305000 | 1.15409800  | -2.54020500 |
| H                                       | -4.45745100 | -2.57619500 | 0.69027700  | O  | -0.63019100 | 3.49112400  | -1.67750800 |
| C                                       | -4.97256900 | -2.17270400 | -2.64691700 | O  | -2.32404700 | 1.93867800  | -0.65221500 |
| H                                       | -3.58429900 | -1.23838900 | -4.00881100 | C  | -4.70673900 | 2.23343900  | -0.81002800 |
| H                                       | -6.14933600 | -3.02792000 | -1.05108100 | H  | -4.88021300 | 1.19184500  | -0.52317200 |
| H                                       | -5.71956900 | -2.37008900 | -3.41164500 | H  | -5.52872600 | 2.55534300  | -1.46041000 |
| C                                       | -2.66239600 | -0.95947200 | 2.12437400  | H  | -4.72388900 | 2.85148100  | 0.09467900  |
| C                                       | -3.07761400 | 0.37405100  | 2.29185800  | C  | -0.92885500 | 5.85992800  | -1.64573900 |
| C                                       | -2.96346200 | -1.88817700 | 3.13303000  | H  | -1.08279300 | 6.73669400  | -1.00566800 |
| C                                       | -3.78487300 | 0.75988700  | 3.43007000  | H  | -1.75322500 | 5.80414400  | -2.36461800 |
| H                                       | -2.84273500 | 1.10238900  | 1.52060800  | H  | 0.00223300  | 5.99670900  | -2.20492200 |
| C                                       | -3.66302300 | -1.49585500 | 4.27826600  | Pd | 0.08808500  | 0.09784700  | 0.09290100  |
| H                                       | -2.65703300 | -2.92506300 | 3.03765900  | C  | 0.96262400  | 2.07219800  | 0.01494400  |
| C                                       | -4.07729900 | -0.17277000 | 4.42902700  | C  | 0.82496000  | 2.61729000  | 1.30754000  |
| H                                       | -4.10278900 | 1.79359500  | 3.54091300  | C  | 2.11474700  | 2.39105800  | -0.73177700 |



|                                           |             |             |             |   |             |             |             |
|-------------------------------------------|-------------|-------------|-------------|---|-------------|-------------|-------------|
| C                                         | 1.84750100  | 3.39290200  | 1.86500000  | C | -4.77188800 | -0.02597100 | -3.22718400 |
| H                                         | -0.07876700 | 2.42949700  | 1.88175300  | H | -5.76433100 | 1.21140100  | -1.76557000 |
| C                                         | 3.11611000  | 3.18803700  | -0.18157800 | H | -3.49546500 | -1.15995500 | -4.54830500 |
| H                                         | 2.21606300  | 2.01356800  | -1.74522800 | H | -5.69480000 | -0.36926800 | -3.68725700 |
| C                                         | 2.99222300  | 3.68264300  | 1.12227700  | C | 3.40757200  | -1.80223000 | -0.50615000 |
| H                                         | 1.73680700  | 3.78437900  | 2.87354100  | C | 3.35972000  | -2.44959800 | 0.74199900  |
| H                                         | 4.00296400  | 3.41743800  | -0.76750700 | C | 4.00537300  | -2.46959900 | -1.58550100 |
| H                                         | 3.77908300  | 4.29894700  | 1.54891900  | C | 3.92384200  | -3.71240100 | 0.90984700  |
|                                           |             |             |             | H | 2.85850200  | -1.97051900 | 1.57767900  |
|                                           |             |             |             | C | 4.55948200  | -3.74227300 | -1.41739500 |
| <b>2c</b>                                 |             |             |             | H | 4.04152700  | -2.01271100 | -2.56902500 |
| SCF energy: -2638.859583                  |             |             |             | C | 4.52747600  | -4.36347100 | -0.16973600 |
| SCF energy in solution: -2638.0194170300  |             |             |             | H | 3.87867900  | -4.19457900 | 1.88268900  |
| Free energy in solution: -2637.4065360300 |             |             |             | H | 5.01721800  | -4.24389500 | -2.26638300 |
|                                           |             |             |             | H | 4.96074200  | -5.35176800 | -0.03985700 |
| P                                         | 2.61710900  | -0.13305000 | -0.61415100 | C | 3.78410900  | 0.91648400  | 0.36729600  |
| C                                         | 0.23514300  | 1.95953200  | -2.67827200 | C | 5.17188800  | 0.89792600  | 0.15107600  |
| H                                         | 0.41723700  | 1.08483200  | -3.31204600 | C | 3.26439400  | 1.76293000  | 1.35673800  |
| H                                         | -0.34764200 | 2.66181500  | -3.28362900 | C | 6.01677900  | 1.71599500  | 0.90043200  |
| C                                         | 2.99015500  | 0.39204000  | -2.37249400 | H | 5.59653500  | 0.23035900  | -0.59466100 |
| H                                         | 4.01203900  | 0.09328600  | -2.63450600 | C | 4.11107800  | 2.58169800  | 2.10919800  |
| H                                         | 2.31806000  | -0.20061800 | -3.00550300 | H | 2.19222100  | 1.76864000  | 1.53712600  |
| C                                         | 1.56485800  | 2.59708900  | -2.20329900 | C | 5.48706600  | 2.56111000  | 1.88038500  |
| H                                         | 1.58888200  | 2.65166100  | -1.10833600 | H | 7.08922100  | 1.69100600  | 0.72461100  |
| H                                         | 1.60379800  | 3.63813500  | -2.54481900 | H | 3.69400500  | 3.23063100  | 2.87487700  |
| C                                         | 2.84747100  | 1.89589800  | -2.68179200 | H | 6.14735600  | 3.19569800  | 2.46575200  |
| H                                         | 2.94315400  | 2.01567700  | -3.77028400 | O | 0.23671500  | -1.72052500 | 1.58693700  |
| H                                         | 3.70129500  | 2.42398900  | -2.23956400 | C | -0.98211100 | -1.38754900 | 1.37543300  |
| P                                         | -0.78963300 | 1.36235000  | -1.22894200 | C | -1.70941800 | -0.44766900 | 2.28379200  |
| C                                         | -1.21338700 | 2.96126900  | -0.40095600 | C | -3.02093100 | -0.01422300 | 2.02996700  |
| C                                         | -1.67790600 | 4.07806500  | -1.11780600 | C | -1.04924800 | 0.03279700  | 3.42658200  |
| C                                         | -1.05238500 | 3.07109800  | 0.98728900  | C | -3.65117300 | 0.88105500  | 2.89233400  |
| C                                         | -1.96279600 | 5.27531900  | -0.46268700 | H | -3.54214200 | -0.37032300 | 1.14570200  |
| H                                         | -1.82893400 | 4.01373800  | -2.19222800 | C | -1.68207300 | 0.92986800  | 4.28551100  |
| C                                         | -1.34281700 | 4.26989300  | 1.64500800  | H | -0.04560900 | -0.32420900 | 3.63267700  |
| H                                         | -0.70826900 | 2.21063100  | 1.55314900  | C | -2.98590200 | 1.36093400  | 4.02394400  |
| C                                         | -1.79349400 | 5.37376800  | 0.92191100  | H | -4.66681900 | 1.20629200  | 2.68011800  |
| H                                         | -2.31866000 | 6.13094700  | -1.03099200 | H | -1.16022800 | 1.28231800  | 5.17216800  |
| H                                         | -1.22102500 | 4.33219900  | 2.72279200  | H | -3.48119900 | 2.05499200  | 4.69784400  |
| H                                         | -2.01721900 | 6.30723700  | 1.43193200  | C | -2.62195600 | -3.82325300 | -1.19013700 |
| C                                         | -2.37712600 | 0.87680500  | -2.04450900 | C | -3.54031400 | -4.26636800 | 1.05867400  |
| C                                         | -3.62380700 | 1.31001100  | -1.56407300 | C | -3.91200600 | -3.98740600 | -0.39336900 |
| C                                         | -2.35265100 | -0.02933500 | -3.11940900 | H | -2.79999800 | -3.52930100 | -2.22831100 |
| C                                         | -4.80984200 | 0.86053300  | -2.15000600 | H | -3.05675700 | -5.25008400 | 1.14437400  |
| H                                         | -3.66998800 | 2.00463700  | -0.73147900 | H | -4.51185000 | -3.07111300 | -0.46281900 |
| C                                         | -3.53749600 | -0.46867900 | -3.71017000 | N | -1.85740600 | -2.41770000 | 0.73485200  |
| H                                         | -1.40551700 | -0.41177900 | -3.48754700 |   |             |             |             |

|                                           |             |             |             |   |             |             |             |
|-------------------------------------------|-------------|-------------|-------------|---|-------------|-------------|-------------|
| C                                         | -2.57388100 | -3.24494700 | 1.64322500  | C | -4.67666200 | 1.44190000  | -3.15209200 |
| C                                         | -1.68451200 | -2.77126500 | -0.61259700 | H | -5.53915700 | 2.85723100  | -1.77361500 |
| O                                         | -2.42286600 | -3.13736500 | 2.84246800  | H | -3.54044800 | 0.04227400  | -4.34067500 |
| O                                         | -0.82877300 | -2.26339900 | -1.31906900 | H | -5.59540700 | 1.30306800  | -3.71573800 |
| H                                         | -4.40553200 | -4.28795900 | 1.72819700  | C | 2.76252300  | -1.90872700 | -1.64667900 |
| H                                         | -4.52026600 | -4.80151600 | -0.80257300 | C | 3.85016100  | -2.69298300 | -1.23929900 |
| H                                         | -2.06891500 | -4.77325400 | -1.22052500 | C | 1.83856000  | -2.45845900 | -2.55150400 |
| Pd                                        | 0.31339300  | -0.23908300 | 0.04077600  | C | 4.01796300  | -3.98753800 | -1.73771800 |
| <b>TS1c</b>                               |             |             |             | H | 4.56816800  | -2.29896000 | -0.52730900 |
| SCF energy: -2638.835531                  |             |             |             | C | 2.01253300  | -3.74590000 | -3.05744600 |
| SCF energy in solution: -2637.9974260000  |             |             |             | H | 0.96475100  | -1.88233600 | -2.84814700 |
| Free energy in solution: -2637.3850890000 |             |             |             | C | 3.10530300  | -4.51591600 | -2.65121100 |
| P                                         | 2.43905500  | -0.19026500 | -1.04871500 | H | 4.86642300  | -4.58247100 | -1.40900400 |
| C                                         | 0.43758200  | 2.54495300  | -2.15547700 | H | 1.28826900  | -4.15229400 | -3.75880600 |
| H                                         | 0.48099500  | 1.71622500  | -2.86871500 | H | 3.23895400  | -5.52244700 | -3.03869600 |
| H                                         | -0.02324500 | 3.38475100  | -2.68609700 | C | 3.79572300  | 0.17949000  | 0.14740700  |
| C                                         | 2.95394900  | 0.76187400  | -2.58672600 | C | 5.14141600  | 0.32331800  | -0.23266800 |
| H                                         | 3.92113100  | 0.38951200  | -2.94413900 | C | 3.45636400  | 0.35338300  | 1.49962000  |
| H                                         | 2.22438200  | 0.46922000  | -3.35177000 | C | 6.12081100  | 0.62805000  | 0.71369200  |
| C                                         | 1.84634700  | 2.91361900  | -1.63691300 | H | 5.43417800  | 0.19219200  | -1.27096300 |
| H                                         | 1.95595800  | 2.60524300  | -0.58953600 | C | 4.43777000  | 0.65603500  | 2.44648300  |
| H                                         | 1.95753300  | 4.00361000  | -1.63179200 | H | 2.41798600  | 0.26127500  | 1.80991900  |
| C                                         | 3.00429100  | 2.29533700  | -2.43924600 | C | 5.77033100  | 0.79422600  | 2.05603300  |
| H                                         | 3.03994500  | 2.73426700  | -3.44612100 | H | 7.15660100  | 0.73668800  | 0.40241600  |
| H                                         | 3.94368100  | 2.57575600  | -1.94740300 | H | 4.15510100  | 0.78873800  | 3.48725100  |
| P                                         | -0.69983400 | 1.97901600  | -0.77915400 | H | 6.53337300  | 1.03399100  | 2.79190000  |
| C                                         | -0.86345200 | 3.55101100  | 0.17991700  | O | -0.48199400 | 0.60494800  | 2.74942200  |
| C                                         | -1.23390500 | 4.75214200  | -0.45282500 | C | -1.11103800 | 0.00782700  | 1.87459400  |
| C                                         | -0.53943500 | 3.57556400  | 1.54436800  | C | -2.59117700 | 0.16698700  | 1.64706500  |
| C                                         | -1.28385100 | 5.94693500  | 0.26313300  | C | -3.29641600 | -0.63604800 | 0.74297700  |
| H                                         | -1.49527600 | 4.75672000  | -1.50761800 | C | -3.27174800 | 1.16283700  | 2.35824900  |
| C                                         | -0.58817200 | 4.77749000  | 2.25825600  | C | -4.66745100 | -0.46326500 | 0.56995700  |
| H                                         | -0.26820000 | 2.65588500  | 2.05331200  | H | -2.76383500 | -1.40388500 | 0.18875400  |
| C                                         | -0.95869000 | 5.96174600  | 1.62281100  | C | -4.64392800 | 1.34129100  | 2.17674400  |
| H                                         | -1.57489000 | 6.86574900  | -0.23953800 | H | -2.72030100 | 1.76580000  | 3.07151800  |
| H                                         | -0.33696500 | 4.77999400  | 3.31557600  | C | -5.34693000 | 0.52627400  | 1.28759400  |
| H                                         | -0.99582900 | 6.89390300  | 2.18068400  | H | -5.20780100 | -1.09719500 | -0.12839900 |
| C                                         | -2.29582400 | 1.81022200  | -1.69557800 | H | -5.16684900 | 2.10723500  | 2.74449900  |
| C                                         | -3.46310300 | 2.50013600  | -1.34180100 | H | -6.41764600 | 0.65879200  | 1.15375500  |
| C                                         | -2.34725100 | 0.91275600  | -2.77699400 | C | 0.36104000  | -3.95767500 | 2.08066500  |
| C                                         | -4.64327300 | 2.31614600  | -2.06627100 | C | -1.30865500 | -3.73917700 | 3.91095000  |
| H                                         | -3.45995400 | 3.17459100  | -0.49283600 | C | -0.78766600 | -4.65797800 | 2.80695600  |
| C                                         | -3.52327600 | 0.73550900  | -3.50353700 | H | 0.68669300  | -4.49109900 | 1.18297500  |
| H                                         | -1.46552900 | 0.33657900  | -3.04694400 | H | -0.54198700 | -3.61620600 | 4.69062500  |
|                                           |             |             |             | H | -1.59438800 | -4.87828300 | 2.09535800  |
|                                           |             |             |             | N | -0.98819800 | -1.86689400 | 2.26831200  |

|                                           |             |             |             |   |             |             |             |
|-------------------------------------------|-------------|-------------|-------------|---|-------------|-------------|-------------|
| C                                         | -1.66216400 | -2.33864100 | 3.40165200  | C | -4.70458600 | 1.95698500  | 2.70113100  |
| C                                         | -0.00658700 | -2.54244000 | 1.66697700  | H | -6.17264800 | 1.18879400  | 1.32066700  |
| O                                         | -2.48649000 | -1.65631300 | 3.98186400  | H | -3.02054200 | 2.52960700  | 3.92572800  |
| O                                         | 0.66088600  | -2.02146300 | 0.73394600  | H | -5.37968200 | 2.68474100  | 3.14308500  |
| H                                         | -2.20154300 | -4.13260400 | 4.40435000  | C | 3.42266600  | 0.06911600  | 0.95170200  |
| H                                         | -0.45505000 | -5.61743700 | 3.21877500  | C | 4.68077500  | -0.10802800 | 0.35836000  |
| H                                         | 1.23920900  | -3.88240800 | 2.73873400  | C | 3.22820400  | 1.15633300  | 1.82031300  |
| Pd                                        | 0.16362400  | 0.01899400  | 0.18335700  | C | 5.72807100  | 0.77239800  | 0.64288800  |
|                                           |             |             |             | H | 4.84940900  | -0.93230500 | -0.32679000 |
| <b>3c</b>                                 |             |             |             | C | 4.27910300  | 2.02565500  | 2.11283400  |
| SCF energy: -2638.856499                  |             |             |             | H | 2.24702000  | 1.35740800  | 2.23854900  |
| SCF energy in solution: -2638.01672273    |             |             |             | C | 5.53307100  | 1.83513200  | 1.52620000  |
| Free energy in solution: -2637.4056747300 |             |             |             | H | 6.69664700  | 0.62290000  | 0.17267500  |
| P                                         | 2.00758800  | -1.08902900 | 0.67704000  | H | 4.10547200  | 2.86428900  | 2.78127900  |
| C                                         | -1.11889600 | -2.02812900 | 2.29359200  | H | 6.34984300  | 2.51656400  | 1.74979800  |
| H                                         | -0.58739100 | -1.30445000 | 2.91908000  | C | 2.68846600  | -2.39378000 | -0.43521900 |
| H                                         | -1.97833300 | -2.37214800 | 2.87840100  | C | 3.58069300  | -3.38398700 | 0.00964000  |
| C                                         | 1.99212300  | -1.89438900 | 2.37799300  | C | 2.29997100  | -2.39116900 | -1.78575100 |
| H                                         | 3.02919700  | -2.06446500 | 2.68924700  | C | 4.06231000  | -4.35521800 | -0.86934800 |
| H                                         | 1.61297900  | -1.10954700 | 3.04396700  | H | 3.91298800  | -3.39596900 | 1.04368400  |
| C                                         | -0.20181300 | -3.20571400 | 1.88674600  | C | 2.78869500  | -3.36012900 | -2.66504000 |
| H                                         | -0.05806400 | -3.22123600 | 0.79906500  | H | 1.62304800  | -1.62327600 | -2.14936500 |
| H                                         | -0.70085100 | -4.15153300 | 2.12506400  | C | 3.66525700  | -4.34572500 | -2.20854800 |
| C                                         | 1.18220600  | -3.19266900 | 2.55157400  | H | 4.74907800  | -5.11647000 | -0.50852700 |
| H                                         | 1.07962800  | -3.38222800 | 3.62921300  | H | 2.48073400  | -3.34195400 | -3.70693500 |
| H                                         | 1.75801200  | -4.03238200 | 2.14538200  | H | 4.04054500  | -5.10222600 | -2.89268000 |
| P                                         | -1.74972500 | -1.09535200 | 0.80717800  | O | -1.51352800 | -0.13558600 | -2.76511600 |
| C                                         | -2.76088900 | -2.39892100 | -0.01538200 | C | -1.41123500 | 0.56162400  | -1.77423000 |
| C                                         | -3.78691600 | -3.06540300 | 0.67962200  | C | -2.14071100 | 1.86681700  | -1.66378400 |
| C                                         | -2.45454400 | -2.79930500 | -1.32397300 | C | -1.97933900 | 2.72590100  | -0.56905700 |
| C                                         | -4.49207900 | -4.10469800 | 0.07573400  | C | -3.01932800 | 2.22280600  | -2.70379600 |
| H                                         | -4.04497100 | -2.76681400 | 1.69219500  | C | -2.68563600 | 3.92875900  | -0.51622700 |
| C                                         | -3.16316100 | -3.84390300 | -1.92528700 | H | -1.27918200 | 2.46560500  | 0.21604200  |
| H                                         | -1.68167300 | -2.28032300 | -1.87998700 | C | -3.72478200 | 3.42024100  | -2.64480700 |
| C                                         | -4.17923000 | -4.49724500 | -1.22935300 | H | -3.12965800 | 1.54650600  | -3.54559500 |
| H                                         | -5.28440800 | -4.60876100 | 0.62285200  | C | -3.55788700 | 4.27594600  | -1.54941300 |
| H                                         | -2.91853600 | -4.13987300 | -2.94167700 | H | -2.54722800 | 4.59263300  | 0.33241600  |
| H                                         | -4.72926700 | -5.30841500 | -1.69910300 | H | -4.40240800 | 3.69175300  | -3.45037900 |
| C                                         | -2.95994900 | 0.07292200  | 1.55867600  | H | -4.10779700 | 5.21295500  | -1.50503600 |
| C                                         | -4.28421300 | 0.18100600  | 1.10999500  | C | 2.51021100  | 3.00419700  | -2.08809100 |
| C                                         | -2.51490200 | 0.93805800  | 2.57307000  | C | 2.10027400  | 4.77290300  | -0.37110100 |
| C                                         | -5.14977500 | 1.11664400  | 1.68040600  | C | 3.15803400  | 4.12396100  | -1.26878700 |
| H                                         | -4.64381600 | -0.46210600 | 0.31344300  | H | 3.24923100  | 2.37330400  | -2.59158000 |
| C                                         | -3.38265600 | 1.86771300  | 3.14398900  | H | 1.35042800  | 5.28671200  | -0.99179800 |
| H                                         | -1.48057400 | 0.90882200  | 2.90493200  | H | 3.95723200  | 3.70374400  | -0.64476300 |
|                                           |             |             |             | N | 1.13579500  | 2.47534000  | -0.05123000 |

|                                           |             |             |             |   |             |             |             |
|-------------------------------------------|-------------|-------------|-------------|---|-------------|-------------|-------------|
| C                                         | 1.36784500  | 3.72894900  | 0.47959500  | C | 5.84188800  | -0.39408800 | 1.82923000  |
| C                                         | 1.62354500  | 2.11592500  | -1.22723200 | H | 6.44222300  | 0.14829200  | -0.17015700 |
| O                                         | 0.97100800  | 4.01786900  | 1.60676900  | H | 4.94310100  | -0.82670700 | 3.74270100  |
| O                                         | 1.34284900  | 0.96382900  | -1.70983000 | H | 6.81029700  | -0.80745000 | 2.09749100  |
| H                                         | 2.52430300  | 5.51992800  | 0.30580600  | C | -3.28770500 | -0.61955200 | 1.24290800  |
| H                                         | 3.62312400  | 4.86521500  | -1.92969400 | C | -4.44301000 | -0.67284700 | 0.44831100  |
| H                                         | 1.87118400  | 3.42708700  | -2.87757900 | C | -3.12213100 | -1.57575200 | 2.25796200  |
| Pd                                        | -0.05430800 | -0.09135000 | -0.40235000 | C | -5.41732400 | -1.64781300 | 0.67602200  |
|                                           |             |             |             | H | -4.58822000 | 0.05002400  | -0.34773300 |
|                                           |             |             |             | C | -4.10074700 | -2.54223500 | 2.48959300  |
| <b>4c</b>                                 |             |             |             | H | -2.21673400 | -1.58832400 | 2.85590700  |
| SCF energy: -2638.872183                  |             |             |             | C | -5.25253100 | -2.58089300 | 1.70100900  |
| SCF energy in solution: -2638.03425282    |             |             |             | H | -6.30840000 | -1.67044400 | 0.05382300  |
| Free energy in solution: -2637.4216598200 |             |             |             | H | -3.95403300 | -3.27360400 | 3.27971700  |
|                                           |             |             |             | H | -6.01314800 | -3.33605300 | 1.88098600  |
| P                                         | -1.97379000 | 0.65131500  | 0.95891100  | C | -2.87345800 | 1.96572800  | 0.02940000  |
| C                                         | 1.18179800  | 2.27464500  | 2.18906300  | C | -3.86623200 | 2.76133700  | 0.62842000  |
| H                                         | 1.00469200  | 1.54678500  | 2.98846200  | C | -2.57307800 | 2.15753900  | -1.32821000 |
| H                                         | 2.04450100  | 2.87187100  | 2.50262200  | C | -4.52367500 | 3.74728900  | -0.10653000 |
| C                                         | -1.80184200 | 1.34808400  | 2.69847700  | H | -4.14020500 | 2.60376700  | 1.66808700  |
| H                                         | -2.76737900 | 1.26633800  | 3.21019000  | C | -3.24136700 | 3.14155300  | -2.06334500 |
| H                                         | -1.12716800 | 0.65139300  | 3.21047300  | H | -1.85054900 | 1.50837200  | -1.81563800 |
| C                                         | -0.06442700 | 3.16416500  | 1.96881600  | C | -4.20733600 | 3.94250300  | -1.45423700 |
| H                                         | -0.36361400 | 3.15710400  | 0.91414800  | H | -5.28590200 | 4.35837300  | 0.37000000  |
| H                                         | 0.20087200  | 4.20571900  | 2.18326200  | H | -3.00541500 | 3.27404000  | -3.11572200 |
| C                                         | -1.27928000 | 2.79202900  | 2.83116100  | H | -4.72109500 | 4.71019600  | -2.02710300 |
| H                                         | -1.04068000 | 2.96195500  | 3.89073100  | O | 1.87556200  | -0.51940100 | -2.31137800 |
| H                                         | -2.08797700 | 3.48831100  | 2.58393900  | C | 1.63704100  | -1.04024100 | -1.23896600 |
| P                                         | 1.66876300  | 1.31290700  | 0.66465300  | C | 2.38494300  | -2.27206000 | -0.80709700 |
| C                                         | 2.02539200  | 2.65129600  | -0.55021600 | C | 2.21157000  | -2.84542900 | 0.45739200  |
| C                                         | 2.86800700  | 3.72742400  | -0.22036300 | C | 3.30304000  | -2.84201300 | -1.70722500 |
| C                                         | 1.43139700  | 2.61209800  | -1.82024600 | C | 2.94614100  | -3.97609400 | 0.81939600  |
| C                                         | 3.10099300  | 4.74980300  | -1.13814700 | H | 1.47558800  | -2.42474700 | 1.13302700  |
| H                                         | 3.35412900  | 3.76446800  | 0.75112800  | C | 4.03045200  | -3.97141100 | -1.34583200 |
| C                                         | 1.66987100  | 3.63871100  | -2.73864500 | H | 3.42669500  | -2.38076500 | -2.68212100 |
| H                                         | 0.80893600  | 1.76827100  | -2.09872500 | C | 3.85391700  | -4.53952400 | -0.07855800 |
| C                                         | 2.49861800  | 4.70752200  | -2.39946800 | H | 2.80028000  | -4.42187300 | 1.79970600  |
| H                                         | 3.75332200  | 5.57720600  | -0.87146100 | H | 4.73523000  | -4.41182900 | -2.04686100 |
| H                                         | 1.20927700  | 3.59340200  | -3.72155100 | H | 4.42187500  | -5.42268400 | 0.20417100  |
| H                                         | 2.68223100  | 5.50440500  | -3.11545000 | C | -2.23661400 | -2.77257400 | -2.95030600 |
| C                                         | 3.33632800  | 0.67778500  | 1.13438600  | C | -1.91616200 | -4.16666200 | -0.90822100 |
| C                                         | 4.39267300  | 0.67439700  | 0.21045400  | C | -2.91756700 | -3.74063600 | -1.98174500 |
| C                                         | 3.55033000  | 0.12248900  | 2.40640000  | H | -2.93152000 | -2.34557400 | -3.67871300 |
| C                                         | 5.63555800  | 0.14331500  | 0.55788800  | H | -1.13481100 | -4.80093700 | -1.35373400 |
| H                                         | 4.24410400  | 1.08326200  | -0.78382200 | H | -3.77408800 | -3.24516000 | -1.50647200 |
| C                                         | 4.79466600  | -0.40475600 | 2.75224400  | N | -1.03490900 | -1.82463200 | -0.97274100 |
| H                                         | 2.74542800  | 0.09032900  | 3.13539400  |   |             |             |             |

|                                           |             |             |             |   |             |             |             |
|-------------------------------------------|-------------|-------------|-------------|---|-------------|-------------|-------------|
| C                                         | -1.20579600 | -2.98317200 | -0.25317500 | C | -5.12036500 | -3.67391600 | -1.37202200 |
| C                                         | -1.55988100 | -1.61098700 | -2.22620600 | H | -6.59796600 | -2.35974600 | -0.51317400 |
| O                                         | -0.77837600 | -3.08710100 | 0.89932800  | H | -3.42872700 | -4.74335000 | -2.18135500 |
| O                                         | -1.47490300 | -0.50786400 | -2.77128400 | H | -5.80658300 | -4.50914800 | -1.48242300 |
| H                                         | -2.38145000 | -4.74968900 | -0.10868100 | C | 3.28261200  | 0.02131700  | -1.13558800 |
| H                                         | -3.30913700 | -4.61430800 | -2.51649600 | C | 4.20240900  | 0.68074500  | -0.30382500 |
| H                                         | -1.45732900 | -3.30000400 | -3.52098300 | C | 3.72724700  | -1.06922300 | -1.90108300 |
| Pd                                        | 0.11675600  | -0.24229400 | -0.11136700 | C | 5.53606800  | 0.27143000  | -0.26577900 |
| <b>TS2c</b>                               |             |             |             | H | 3.86874500  | 1.49385600  | 0.32752700  |
| SCF energy: -2638.807877                  |             |             |             | C | 5.06093800  | -1.47805400 | -1.85499400 |
| SCF energy in solution: -2637.9711702200  |             |             |             | H | 3.03641600  | -1.61481900 | -2.53626600 |
| Free energy in solution: -2637.3605342200 |             |             |             | C | 5.97204400  | -0.80402800 | -1.04162700 |
| P                                         | 1.51251800  | 0.55109400  | -1.21360000 | H | 6.23559700  | 0.79727300  | 0.37900000  |
| C                                         | -2.00047500 | 0.30582400  | -2.77524700 | H | 5.38425600  | -2.32369900 | -2.45651900 |
| H                                         | -1.59166900 | -0.58844600 | -3.25929500 | H | 7.01219400  | -1.11799600 | -1.00868400 |
| H                                         | -3.02068300 | 0.41073100  | -3.16095900 | C | 1.59070000  | 2.38943200  | -1.09629800 |
| C                                         | 1.15727100  | 0.27772000  | -3.05015200 | C | 2.48846400  | 3.13063300  | -1.88059600 |
| H                                         | 2.11110700  | 0.27990600  | -3.58878900 | C | 0.70419800  | 3.07040300  | -0.25097600 |
| H                                         | 0.76042400  | -0.74165600 | -3.12373200 | C | 2.49366000  | 4.52539700  | -1.82557600 |
| C                                         | -1.14485700 | 1.55275600  | -3.09397100 | H | 3.19610700  | 2.61985600  | -2.52828000 |
| H                                         | -0.98402400 | 2.15024600  | -2.19130800 | C | 0.70593600  | 4.46563800  | -0.20143900 |
| H                                         | -1.70973200 | 2.20383300  | -3.77288600 | H | 0.02567300  | 2.50296900  | 0.37782300  |
| C                                         | 0.21112400  | 1.26628800  | -3.75668300 | C | 1.59958200  | 5.19537900  | -0.98749500 |
| H                                         | 0.03663800  | 0.87541600  | -4.76956000 | H | 3.19702700  | 5.08670300  | -2.43520800 |
| H                                         | 0.72933800  | 2.22349700  | -3.88288600 | H | 0.01417100  | 4.98043300  | 0.45998800  |
| P                                         | -2.13253000 | -0.11972600 | -0.95995800 | H | 1.60373800  | 6.28143100  | -0.94404800 |
| C                                         | -3.11697800 | 1.26315500  | -0.24367200 | O | -1.29277300 | -3.24203100 | 1.38332700  |
| C                                         | -3.72958200 | 2.25608800  | -1.02567800 | C | -0.69166100 | -2.35213100 | 0.95061300  |
| C                                         | -3.27443000 | 1.30067100  | 1.15266600  | C | 1.27338600  | -2.45576800 | 0.64573800  |
| C                                         | -4.47686600 | 3.27097000  | -0.42460800 | C | 1.56669400  | -3.42616000 | -0.32311900 |
| H                                         | -3.63403300 | 2.25033100  | -2.10602100 | C | 2.09573700  | -2.32463900 | 1.77038700  |
| C                                         | -4.03550300 | 2.30990400  | 1.74550300  | C | 2.69993800  | -4.23074000 | -0.18765400 |
| H                                         | -2.80955300 | 0.53925500  | 1.77521000  | H | 0.90584700  | -3.56653900 | -1.17463200 |
| C                                         | -4.63239700 | 3.29989000  | 0.96216500  | C | 3.22877900  | -3.13072900 | 1.90025800  |
| H                                         | -4.93946600 | 4.03550000  | -1.04336100 | H | 1.84927900  | -1.59121300 | 2.52933100  |
| H                                         | -4.15582300 | 2.32027600  | 2.82550200  | C | 3.53358200  | -4.08116200 | 0.92288200  |
| H                                         | -5.21696500 | 4.08879900  | 1.42836000  | H | 2.92479400  | -4.97950800 | -0.94348100 |
| C                                         | -3.34302800 | -1.51559200 | -1.07177900 | H | 3.87295000  | -3.01637000 | 2.76844000  |
| C                                         | -4.68368400 | -1.39308000 | -0.68226700 | H | 4.41345300  | -4.70987200 | 1.03132000  |
| C                                         | -2.90481000 | -2.73706900 | -1.60920700 | C | -0.51981800 | 0.55480000  | 4.77471900  |
| C                                         | -5.56360200 | -2.46850100 | -0.82827100 | C | 1.52667400  | 1.72835200  | 4.02694600  |
| H                                         | -5.04414700 | -0.46159800 | -0.25926200 | C | 0.23520300  | 1.88115700  | 4.82577000  |
| C                                         | -3.78649700 | -3.80521600 | -1.76555000 | H | -1.51038500 | 0.60842000  | 5.23511000  |
| H                                         | -1.86242500 | -2.85939200 | -1.89500900 | H | 2.21619300  | 1.05452300  | 4.55811400  |
|                                           |             |             |             | H | -0.38284900 | 2.67500500  | 4.38373400  |
|                                           |             |             |             | N | 0.18965400  | 0.37905300  | 2.36110700  |

|                                           |             |             |             |   |             |             |             |
|-------------------------------------------|-------------|-------------|-------------|---|-------------|-------------|-------------|
| C                                         | 1.29639600  | 1.13441700  | 2.63043800  | C | 5.94415600  | -1.30463400 | 1.42944000  |
| C                                         | -0.71004200 | 0.05243400  | 3.33810700  | H | 6.64563400  | -0.84292100 | -0.55821900 |
| O                                         | 2.15578700  | 1.34906300  | 1.76532700  | H | 4.97616800  | -1.59195800 | 3.33614400  |
| O                                         | -1.69075800 | -0.66768500 | 3.09870600  | H | 6.80678900  | -1.91604300 | 1.68135400  |
| H                                         | 2.05901400  | 2.67461100  | 3.89223600  | C | -2.91400200 | 0.59269700  | 1.70692700  |
| H                                         | 0.44298400  | 2.17973700  | 5.86049700  | C | -4.11282300 | 0.60214600  | 0.97765100  |
| H                                         | 0.04223000  | -0.21551700 | 5.32449100  | C | -2.84586200 | -0.18065900 | 2.87874700  |
| Pd                                        | -0.07332300 | -0.76359100 | 0.13154300  | C | -5.21670100 | -0.13658600 | 1.41248300  |
| <b>TS3c</b>                               |             |             |             | H | -4.19055400 | 1.18729400  | 0.06797200  |
| SCF energy: -3364.976436                  |             |             |             | C | -3.95159100 | -0.91261700 | 3.31246200  |
| SCF energy in solution: -3364.0415340500  |             |             |             | H | -1.92806600 | -0.20934600 | 3.45537600  |
| Free energy in solution: -3363.2837760500 |             |             |             | C | -5.14149700 | -0.89538000 | 2.58086300  |
| P                                         | -1.43108800 | 1.55061600  | 1.14992900  | H | -6.13992700 | -0.10738200 | 0.83865900  |
| C                                         | 2.01684400  | 2.33026300  | 1.90894500  | H | -3.88264700 | -1.49617500 | 4.22718900  |
| H                                         | 1.61599900  | 1.63898400  | 2.65520600  | H | -6.00222600 | -1.46468600 | 2.92203300  |
| H                                         | 3.00671400  | 2.64827200  | 2.25321800  | C | -2.18933600 | 2.90826200  | 0.15000300  |
| C                                         | -0.96647900 | 2.37834800  | 2.76621700  | C | -2.98308300 | 3.91320300  | 0.72960200  |
| H                                         | -1.88391000 | 2.61452500  | 3.31750800  | C | -1.97359900 | 2.93413000  | -1.23642900 |
| H                                         | -0.45063200 | 1.59084500  | 3.32464200  | C | -3.53258800 | 4.92699400  | -0.05513700 |
| C                                         | 1.08392700  | 3.54228000  | 1.67887600  | H | -3.18250700 | 3.90183600  | 1.79777400  |
| H                                         | 0.67068600  | 3.52486900  | 0.66298600  | C | -2.53104500 | 3.94603300  | -2.02281700 |
| H                                         | 1.67085900  | 4.46646300  | 1.73094200  | H | -1.38504900 | 2.14742000  | -1.69855000 |
| C                                         | -0.08499900 | 3.63683300  | 2.66963400  | C | -3.30569900 | 4.94588200  | -1.43416600 |
| H                                         | 0.29801500  | 3.85291500  | 3.67672100  | H | -4.14056300 | 5.69963700  | 0.40859600  |
| H                                         | -0.70275000 | 4.49625000  | 2.38207100  | H | -2.35946900 | 3.94794100  | -3.09598800 |
| P                                         | 2.23617700  | 1.30210400  | 0.37450900  | H | -3.73556000 | 5.73523000  | -2.04543600 |
| C                                         | 2.87614500  | 2.54310500  | -0.83572000 | O | 1.10648600  | -0.14142200 | -2.81823100 |
| C                                         | 4.01618100  | 3.31148800  | -0.53807700 | C | 1.29639700  | -0.65613200 | -1.73281800 |
| C                                         | 2.19172700  | 2.78145000  | -2.03541600 | C | 2.11226500  | -1.91188800 | -1.62102300 |
| C                                         | 4.45746200  | 4.29607000  | -1.42008400 | C | 2.29264700  | -2.58248000 | -0.40694400 |
| H                                         | 4.56779500  | 3.13544200  | 0.38152000  | C | 2.71727700  | -2.41344000 | -2.78838300 |
| C                                         | 2.63777000  | 3.76917600  | -2.91920100 | C | 3.06511900  | -3.74367900 | -0.35890600 |
| H                                         | 1.32472800  | 2.18026500  | -2.28628900 | H | 1.81372900  | -2.19268200 | 0.48369000  |
| C                                         | 3.76657100  | 4.52803200  | -2.61353500 | C | 3.48679900  | -3.57164700 | -2.73682700 |
| H                                         | 5.33991000  | 4.88230500  | -1.17710400 | H | 2.57094100  | -1.87819000 | -3.72125100 |
| H                                         | 2.09996500  | 3.93871400  | -3.84810000 | C | 3.66132400  | -4.23973900 | -1.51946500 |
| H                                         | 4.11168300  | 5.29582000  | -3.30114100 | H | 3.20436200  | -4.25967500 | 0.58726000  |
| C                                         | 3.71965600  | 0.28607500  | 0.78289900  | H | 3.95316000  | -3.95492800 | -3.64096200 |
| C                                         | 4.75092500  | 0.08871100  | -0.14859000 | H | 4.26387700  | -5.14380000 | -1.47801800 |
| C                                         | 3.80688300  | -0.33772400 | 2.03990900  | C | -0.59899700 | -4.17395800 | 2.32164300  |
| C                                         | 5.85523800  | -0.70104800 | 0.17411500  | C | 0.46751600  | -2.69791700 | 4.00371400  |
| H                                         | 4.69763200  | 0.55523200  | -1.12724500 | C | -0.61865600 | -3.75045400 | 3.78830600  |
| C                                         | 4.91700400  | -1.12182700 | 2.35773100  | H | -1.44377500 | -4.81545700 | 2.05403800  |
| H                                         | 3.00019700  | -0.23418500 | 2.76009400  | H | 1.46039400  | -3.16002800 | 3.88792200  |
|                                           |             |             |             | H | -1.60010800 | -3.32163700 | 4.03400500  |
|                                           |             |             |             | N | -0.11576000 | -1.76232500 | 1.73702400  |

|                                           |             |             |             |   |             |             |             |
|-------------------------------------------|-------------|-------------|-------------|---|-------------|-------------|-------------|
| C                                         | 0.37016700  | -1.55135000 | 2.98777500  | P | 2.18412400  | 1.50505700  | 0.25736100  |
| C                                         | -0.60188700 | -2.97848900 | 1.35918600  | C | 2.82265100  | 2.93590400  | -0.71442800 |
| O                                         | 0.77033700  | -0.42681600 | 3.35532700  | C | 3.86634800  | 3.73024900  | -0.20710500 |
| O                                         | -1.03959600 | -3.17472100 | 0.21214500  | C | 2.26220000  | 3.26195400  | -1.95710500 |
| H                                         | 0.43955600  | -2.25793500 | 5.00480800  | C | 4.32941500  | 4.83223100  | -0.92354100 |
| H                                         | -0.47415200 | -4.61134000 | 4.45258500  | H | 4.32549400  | 3.48581300  | 0.74694200  |
| H                                         | 0.31322800  | -4.75395300 | 2.11181800  | C | 2.73161100  | 4.36582400  | -2.67500200 |
| Pd                                        | 0.27462300  | 0.21417600  | -0.21088100 | H | 1.48077000  | 2.63621800  | -2.37362200 |
| P                                         | -2.63300800 | -1.47390500 | -1.51395300 | C | 3.75991700  | 5.15367400  | -2.15937900 |
| H                                         | -3.04820200 | -2.05579900 | -0.31999400 | H | 5.13490700  | 5.43923400  | -0.51875300 |
| C                                         | -1.06258700 | -3.18763400 | -2.88998300 | H | 2.29209100  | 4.60351500  | -3.63989100 |
| H                                         | -0.48985600 | -2.37648800 | -3.34665400 | H | 4.12217500  | 6.01290300  | -2.71769500 |
| H                                         | -0.57313100 | -3.50549700 | -1.96917000 | C | 3.65449600  | 0.41567100  | 0.45890200  |
| C                                         | -5.15340300 | -1.61196500 | -2.32459600 | C | 4.66081800  | 0.37732200  | -0.51905800 |
| H                                         | -4.93065500 | -2.37099300 | -3.08175500 | C | 3.76278100  | -0.41045500 | 1.59079900  |
| H                                         | -5.41695300 | -2.12414300 | -1.38859500 | C | 5.76460400  | -0.46190500 | -0.36287300 |
| O                                         | -1.57577500 | -0.41851200 | -1.40933200 | H | 4.58713400  | 1.00530300  | -1.40178500 |
| O                                         | -3.97724100 | -0.80344600 | -2.11166300 | C | 4.87422000  | -1.24162500 | 1.74153300  |
| O                                         | -2.38231900 | -2.66866500 | -2.54790900 | H | 2.97920300  | -0.42306500 | 2.34423000  |
| C                                         | -1.26402100 | -4.33967400 | -3.85533800 | C | 5.87639000  | -1.27000600 | 0.76986400  |
| H                                         | -1.84700300 | -5.14120900 | -3.39001900 | H | 6.53742200  | -0.48021100 | -1.12678200 |
| H                                         | -0.28781500 | -4.74593200 | -4.14358800 | H | 4.95299600  | -1.87125100 | 2.62407900  |
| H                                         | -1.78343300 | -4.01074600 | -4.76178200 | H | 6.73842900  | -1.92047100 | 0.89281600  |
| C                                         | -6.27830800 | -0.69706700 | -2.77479000 | C | -3.09899900 | 0.83235300  | 0.98455200  |
| H                                         | -7.18758100 | -1.28170400 | -2.95450300 | C | -4.34731100 | 1.37015800  | 0.63704700  |
| H                                         | -6.00648700 | -0.18203700 | -3.70144000 | C | -3.04176900 | -0.44075100 | 1.57517500  |
| H                                         | -6.49476500 | 0.05807200  | -2.01224900 | C | -5.51965200 | 0.65785600  | 0.89916400  |
|                                           |             |             |             | H | -4.41359800 | 2.34591200  | 0.16806400  |
|                                           |             |             |             | C | -4.21813800 | -1.15017200 | 1.82924000  |
| <b>5c</b>                                 |             |             |             | H | -2.07984600 | -0.89112800 | 1.82135100  |
| SCF energy: -3364.980548                  |             |             |             | C | -5.45985200 | -0.60138500 | 1.50046000  |
| SCF energy in solution: -3364.0409706300  |             |             |             | H | -6.48079100 | 1.09293800  | 0.63584300  |
| Free energy in solution: -3363.2867386300 |             |             |             | H | -4.15208200 | -2.13866000 | 2.27587200  |
| P                                         | -1.50575600 | 1.74751300  | 0.76398800  | H | -6.37473600 | -1.15096900 | 1.70845100  |
| C                                         | 1.94665600  | 2.20016500  | 1.95992500  | C | -2.02848400 | 3.34574800  | 0.00880600  |
| H                                         | 1.53749300  | 1.37886600  | 2.55748500  | C | -2.67511900 | 4.36090100  | 0.73387600  |
| H                                         | 2.93746200  | 2.42837400  | 2.36718600  | C | -1.79076000 | 3.54297900  | -1.36113800 |
| C                                         | -1.12398500 | 2.11435400  | 2.56440800  | C | -3.05725100 | 5.54875400  | 0.10857600  |
| H                                         | -2.07427100 | 2.23792500  | 3.09599800  | H | -2.89536500 | 4.22108500  | 1.78821800  |
| H                                         | -0.67670000 | 1.17964000  | 2.92628600  | C | -2.18132700 | 4.72795700  | -1.98839100 |
| C                                         | 1.03174600  | 3.44715300  | 1.97714100  | H | -1.30379100 | 2.75963600  | -1.93660300 |
| H                                         | 0.69579800  | 3.70286700  | 0.96450400  | C | -2.80906700 | 5.73504100  | -1.25352000 |
| H                                         | 1.61356800  | 4.31489600  | 2.30897500  | H | -3.55271000 | 6.32625200  | 0.68421400  |
| C                                         | -0.20134100 | 3.30727100  | 2.87772400  | H | -1.99284700 | 4.86257500  | -3.05009200 |
| H                                         | 0.11716300  | 3.20945500  | 3.92457600  | H | -3.10751600 | 6.66012100  | -1.73955600 |
| H                                         | -0.77110100 | 4.24189200  | 2.81492400  | O | 1.65606100  | 0.30244000  | -3.05385500 |

|    |             |             |             |                          |                  |                         |
|----|-------------|-------------|-------------|--------------------------|------------------|-------------------------|
| C  | 1.45873100  | -0.30277300 | -2.02023600 |                          |                  |                         |
| C  | 1.92554700  | -1.71460700 | -1.82853500 |                          |                  |                         |
| C  | 1.69914900  | -2.40694000 | -0.63268700 |                          |                  |                         |
| C  | 2.60745000  | -2.34463300 | -2.88498000 |                          |                  |                         |
| C  | 2.15591900  | -3.71923200 | -0.49472700 |                          |                  |                         |
| H  | 1.15335300  | -1.93328700 | 0.18067800  |                          |                  |                         |
| C  | 3.05879600  | -3.65329000 | -2.74241000 |                          |                  |                         |
| H  | 2.77033400  | -1.78932800 | -3.80340500 |                          |                  |                         |
| C  | 2.83471600  | -4.34207100 | -1.54368000 |                          |                  |                         |
| H  | 1.97580400  | -4.25393200 | 0.43351600  |                          |                  |                         |
| H  | 3.58591000  | -4.13883600 | -3.55977000 |                          |                  |                         |
| H  | 3.18966300  | -5.36357900 | -1.43109200 |                          |                  |                         |
| C  | -0.41501800 | -4.49592300 | 3.02259700  |                          |                  |                         |
| C  | 0.92517100  | -2.80628700 | 4.25906400  |                          |                  |                         |
| C  | -0.08948600 | -3.93979900 | 4.40891200  |                          |                  |                         |
| H  | -1.23218200 | -5.22317400 | 3.03852600  |                          |                  |                         |
| H  | 1.89757600  | -3.21687800 | 3.94451900  |                          |                  |                         |
| H  | -1.00703400 | -3.55141600 | 4.87222200  |                          |                  |                         |
| N  | -0.31087700 | -2.12401400 | 2.17112300  |                          |                  |                         |
| C  | 0.49715100  | -1.77590600 | 3.20359600  |                          |                  |                         |
| C  | -0.79565600 | -3.38647100 | 2.03195300  |                          |                  |                         |
| O  | 0.93987900  | -0.61443900 | 3.32398600  |                          |                  |                         |
| O  | -1.55277900 | -3.69144700 | 1.08825200  |                          |                  |                         |
| H  | 1.10053000  | -2.26999900 | 5.19643700  |                          |                  |                         |
| H  | 0.29068700  | -4.72641800 | 5.07249000  |                          |                  |                         |
| H  | 0.46456600  | -5.02028700 | 2.61700000  |                          |                  |                         |
| Pd | 0.26339900  | 0.57261200  | -0.62698400 |                          |                  |                         |
| P  | -2.18690100 | -1.68474500 | -1.60324300 |                          |                  |                         |
| H  | -2.10340500 | -2.30855600 | -0.34737500 |                          |                  |                         |
| C  | -1.02704900 | -3.96853300 | -2.39228300 |                          |                  |                         |
| H  | -0.03258400 | -3.66598900 | -2.72873600 |                          |                  |                         |
| H  | -0.99868400 | -4.15509700 | -1.31370200 |                          |                  |                         |
| C  | -4.76986800 | -2.21517200 | -1.96900800 |                          |                  |                         |
| H  | -4.49167000 | -3.02810100 | -2.64687000 |                          |                  |                         |
| H  | -4.90951700 | -2.62384400 | -0.96134700 |                          |                  |                         |
| O  | -1.30494000 | -0.47101300 | -1.76265400 |                          |                  |                         |
| O  | -3.69276000 | -1.24663400 | -1.93140100 |                          |                  |                         |
| O  | -1.94270400 | -2.86664600 | -2.66710700 |                          |                  |                         |
| C  | -1.52034300 | -5.18458000 | -3.15391400 |                          |                  |                         |
| H  | -2.50896700 | -5.49588200 | -2.80055200 |                          |                  |                         |
| H  | -0.82407800 | -6.01773800 | -3.00544300 |                          |                  |                         |
| H  | -1.58288300 | -4.97330500 | -4.22644400 |                          |                  |                         |
| C  | -6.01896000 | -1.49824700 | -2.44641200 |                          |                  |                         |
| H  | -6.85786600 | -2.20234000 | -2.48882300 |                          |                  |                         |
| H  | -5.86419100 | -1.07987400 | -3.44593000 |                          |                  |                         |
| H  | -6.27799100 | -0.68471000 | -1.76277400 |                          |                  |                         |
|    |             |             |             | <b>6c</b>                |                  |                         |
|    |             |             |             | SCF energy:              | -3364.978443     |                         |
|    |             |             |             | SCF energy in solution:  | -3364.0384128200 |                         |
|    |             |             |             | Free energy in solution: | -3363.2822138200 |                         |
|    |             |             |             | P                        | -0.66794300      | 2.35006100 -0.91316100  |
|    |             |             |             | C                        | -2.93493500      | -0.11000300 -2.29826800 |
|    |             |             |             | H                        | -1.98968000      | -0.10864500 -2.84984800 |
|    |             |             |             | H                        | -3.61705600      | -0.76769800 -2.84713100 |
|    |             |             |             | C                        | -1.27981900      | 2.51204200 -2.68212600  |
|    |             |             |             | H                        | -0.90276000      | 3.45802800 -3.08787400  |
|    |             |             |             | H                        | -0.72612500      | 1.72566800 -3.20968600  |
|    |             |             |             | C                        | -3.52014900      | 1.31379400 -2.14731900  |
|    |             |             |             | H                        | -3.51925000      | 1.61998800 -1.09364700  |
|    |             |             |             | H                        | -4.57611900      | 1.30081900 -2.43894700  |
|    |             |             |             | C                        | -2.79003200      | 2.39269400 -2.95651400  |
|    |             |             |             | H                        | -2.92399000      | 2.20951600 -4.03160500  |
|    |             |             |             | H                        | -3.27602300      | 3.35239300 -2.74583100  |
|    |             |             |             | P                        | -2.56998200      | -0.88819500 -0.64684900 |
|    |             |             |             | C                        | -4.20225200      | -0.77806600 0.20008100  |
|    |             |             |             | C                        | -5.36605500      | -1.26518100 -0.42251200 |
|    |             |             |             | C                        | -4.31088400      | -0.14416000 1.44614600  |
|    |             |             |             | C                        | -6.60947600      | -1.12086300 0.19020900  |
|    |             |             |             | H                        | -5.30204200      | -1.76747100 -1.38405700 |
|    |             |             |             | C                        | -5.56020400      | -0.00122600 2.05716400  |
|    |             |             |             | H                        | -3.41952700      | 0.21610800 1.94785400   |
|    |             |             |             | C                        | -6.70831600      | -0.48617700 1.43222600  |
|    |             |             |             | H                        | -7.50066500      | -1.50269800 -0.30074600 |
|    |             |             |             | H                        | -5.62918100      | 0.48753700 3.02500100   |
|    |             |             |             | H                        | -7.67843800      | -0.37384000 1.90904900  |
|    |             |             |             | C                        | -2.35752600      | -2.66562900 -1.07086700 |
|    |             |             |             | C                        | -3.09081300      | -3.67714200 -0.43208700 |
|    |             |             |             | C                        | -1.40813600      | -3.01592600 -2.04702400 |
|    |             |             |             | C                        | -2.89958200      | -5.01501000 -0.78265000 |
|    |             |             |             | H                        | -3.81388400      | -3.42646500 0.33719400  |
|    |             |             |             | C                        | -1.23080800      | -4.35462700 -2.39728600 |
|    |             |             |             | H                        | -0.76665000      | -2.26453900 -2.49999800 |
|    |             |             |             | C                        | -1.97665600      | -5.35615400 -1.77198100 |
|    |             |             |             | H                        | -3.47438400      | -5.78832300 -0.27997600 |
|    |             |             |             | H                        | -0.49455100      | -4.61235700 -3.15391200 |
|    |             |             |             | H                        | -1.83159700      | -6.39771800 -2.04651900 |
|    |             |             |             | C                        | 1.05618500       | 2.93913600 -1.19879600  |
|    |             |             |             | C                        | 1.45458800       | 4.26750800 -0.99130900  |
|    |             |             |             | C                        | 1.97154000       | 2.01723400 -1.72878700  |
|    |             |             |             | C                        | 2.74578500       | 4.67312500 -1.33244700  |



|    |             |             |             |                                           |             |             |             |
|----|-------------|-------------|-------------|-------------------------------------------|-------------|-------------|-------------|
| H  | 0.76175500  | 4.98714800  | -0.56681800 | P                                         | 2.29756300  | 0.58607800  | 1.58678500  |
| C  | 3.26181700  | 2.42974400  | -2.06753700 | H                                         | 2.71497900  | -0.12194100 | 0.43797300  |
| H  | 1.68443900  | 0.97806500  | -1.87135300 | C                                         | 3.47397200  | -1.52776600 | 2.78630100  |
| C  | 3.64907000  | 3.75779600  | -1.87832600 | H                                         | 2.77318300  | -2.36468100 | 2.74077800  |
| H  | 3.04478500  | 5.70577100  | -1.17085800 | H                                         | 4.07876000  | -1.51340300 | 1.87396300  |
| H  | 3.96289300  | 1.70220100  | -2.46559300 | C                                         | 4.60553400  | 1.83911400  | 1.85543800  |
| H  | 4.65241100  | 4.07790300  | -2.14832400 | H                                         | 4.83109600  | 1.42154900  | 2.84312200  |
| C  | -1.47839100 | 3.71032200  | 0.02813400  | H                                         | 4.99380100  | 1.15765700  | 1.08986600  |
| C  | -2.03257500 | 4.84951700  | -0.57801600 | O                                         | 0.83348700  | 0.98916100  | 1.59028400  |
| C  | -1.53276100 | 3.59481500  | 1.42856000  | O                                         | 3.15892600  | 1.93469300  | 1.72499300  |
| C  | -2.63865100 | 5.84252500  | 0.19462200  | O                                         | 2.67580500  | -0.30507800 | 2.87043300  |
| H  | -1.98713500 | 4.97430700  | -1.65577100 | C                                         | 4.33899500  | -1.61184600 | 4.03062000  |
| C  | -2.13225600 | 4.59246400  | 2.19877100  | H                                         | 5.05427800  | -0.78383100 | 4.07253600  |
| H  | -1.09124100 | 2.72858800  | 1.91377800  | H                                         | 4.90412700  | -2.55110200 | 4.02046100  |
| C  | -2.69150000 | 5.71466700  | 1.58385600  | H                                         | 3.72424700  | -1.58628700 | 4.93637800  |
| H  | -3.06611300 | 6.71643200  | -0.29006700 | C                                         | 5.17663300  | 3.23693600  | 1.71165800  |
| H  | -2.16189400 | 4.48968100  | 3.28011500  | H                                         | 6.26647700  | 3.20374800  | 1.82366700  |
| H  | -3.16363700 | 6.48785300  | 2.18414800  | H                                         | 4.76773500  | 3.90275000  | 2.47879200  |
| O  | -1.56503800 | -0.99578100 | 2.84039200  | H                                         | 4.93606600  | 3.65053900  | 0.72842600  |
| C  | -0.90500700 | -1.25617600 | 1.85579400  |                                           |             |             |             |
| C  | -0.06985500 | -2.49427100 | 1.76280600  |                                           |             |             |             |
| C  | 0.72562400  | -2.76454700 | 0.64231400  | <b>TS4c</b>                               |             |             |             |
| C  | -0.09773400 | -3.40078100 | 2.83874200  | SCF energy: -3364.966743                  |             |             |             |
| C  | 1.48506500  | -3.93578000 | 0.59810500  | SCF energy in solution: -3364.0235310500  |             |             |             |
| H  | 0.75800200  | -2.06733500 | -0.19068700 | Free energy in solution: -3363.2731420500 |             |             |             |
| C  | 0.65549300  | -4.56889700 | 2.78545800  | P                                         | -0.48915500 | 2.26387600  | 0.89130500  |
| H  | -0.71470400 | -3.16741600 | 3.70071200  | C                                         | 2.65535200  | 0.91367400  | 2.19595500  |
| C  | 1.44711200  | -4.83870700 | 1.66152800  | H                                         | 1.83356400  | 0.47470800  | 2.77006800  |
| H  | 2.10858000  | -4.13469900 | -0.26818600 | H                                         | 3.58946300  | 0.59748200  | 2.67279800  |
| H  | 0.63087900  | -5.27006100 | 3.61570600  | C                                         | 0.01292900  | 2.54870400  | 2.68076000  |
| H  | 2.03648900  | -5.75142200 | 1.62082100  | H                                         | -0.72004000 | 3.22322000  | 3.13777700  |
| C  | 5.23464600  | -2.21847500 | -2.22451400 | H                                         | -0.14977100 | 1.56347000  | 3.13492900  |
| C  | 3.09510400  | -2.33214900 | -3.49395000 | C                                         | 2.55484900  | 2.45607900  | 2.12842700  |
| C  | 4.59684400  | -2.06075100 | -3.60535800 | H                                         | 2.40906800  | 2.79322100  | 1.09474600  |
| H  | 6.28240200  | -1.90380200 | -2.20390200 | H                                         | 3.51214000  | 2.89162400  | 2.43652700  |
| H  | 2.92657600  | -3.39789000 | -3.27285300 | C                                         | 1.43587200  | 3.05453900  | 2.98811300  |
| H  | 4.75562500  | -1.03571300 | -3.96866600 | H                                         | 1.63712500  | 2.85553500  | 4.04988200  |
| N  | 3.16359300  | -1.13035600 | -1.28707100 | H                                         | 1.47112000  | 4.14369200  | 2.86963000  |
| C  | 2.44651800  | -1.51276700 | -2.36975800 | P                                         | 2.57177100  | 0.14179700  | 0.50908800  |
| C  | 4.48614900  | -1.42661800 | -1.14300600 | C                                         | 3.92610800  | 0.99597600  | -0.40361800 |
| O  | 1.23459900  | -1.22135600 | -2.47923100 | C                                         | 5.24709200  | 0.95587900  | 0.07656000  |
| O  | 5.11511900  | -1.08340700 | -0.12663200 | C                                         | 3.64162200  | 1.74143800  | -1.55573900 |
| H  | 2.55776800  | -2.11513600 | -4.42225100 | C                                         | 6.25947000  | 1.65165900  | -0.58140400 |
| H  | 5.06584100  | -2.73016900 | -4.33711300 | H                                         | 5.48821300  | 0.37163500  | 0.96075400  |
| H  | 5.21996600  | -3.27829000 | -1.92635300 | C                                         | 4.65962300  | 2.43743100  | -2.21407000 |
| Pd | -0.82659100 | 0.18290700  | 0.42142700  | H                                         | 2.63053300  | 1.75866600  | -1.94714600 |



|   |             |             |             |    |             |             |             |
|---|-------------|-------------|-------------|----|-------------|-------------|-------------|
| H | -2.20082300 | 0.19884900  | -2.88242000 | C  | -1.66228600 | 4.96678000  | -0.36833600 |
| H | -3.87426500 | -0.32940400 | -2.83182400 | C  | -0.95286800 | 3.61845300  | 1.51260800  |
| C | -1.29064400 | 2.74158300  | -2.65174100 | C  | -2.07285100 | 5.97377100  | 0.50835800  |
| H | -0.87395100 | 3.68867700  | -3.01391600 | H  | -1.77212600 | 5.12420400  | -1.43685900 |
| H | -0.84136400 | 1.96671100  | -3.28546200 | C  | -1.35819000 | 4.63036000  | 2.38394000  |
| C | -3.56898900 | 1.68240700  | -2.00013600 | H  | -0.49747800 | 2.71345800  | 1.90528900  |
| H | -3.45069300 | 1.92455500  | -0.93630600 | C  | -1.92413000 | 5.80613000  | 1.88603200  |
| H | -4.64360600 | 1.76593700  | -2.19600700 | H  | -2.50530700 | 6.88905500  | 0.11242400  |
| C | -2.82295300 | 2.74815300  | -2.81205000 | H  | -1.23028200 | 4.49591000  | 3.45460100  |
| H | -3.05224600 | 2.63425400  | -3.88071200 | H  | -2.24408300 | 6.58988700  | 2.56764800  |
| H | -3.21802400 | 3.72723000  | -2.51824100 | O  | -1.65598200 | -0.78069800 | 2.82282700  |
| P | -2.72599800 | -0.67900900 | -0.69974000 | C  | -1.06760100 | -1.16439900 | 1.83275600  |
| C | -4.33745000 | -0.56717900 | 0.18621200  | C  | -0.41984200 | -2.51269800 | 1.77711600  |
| C | -5.53084100 | -0.98146100 | -0.43400200 | C  | 0.32593500  | -2.92748400 | 0.66766000  |
| C | -4.40027300 | 0.01792700  | 1.45930700  | C  | -0.58236000 | -3.37756300 | 2.87478000  |
| C | -6.75651200 | -0.82059200 | 0.20972600  | C  | 0.90173800  | -4.19965200 | 0.65522400  |
| H | -5.50543100 | -1.43829400 | -1.41974300 | H  | 0.46518600  | -2.25964500 | -0.17789100 |
| C | -5.63231000 | 0.17888900  | 2.10042100  | C  | -0.00726200 | -4.64425000 | 2.85631400  |
| H | -3.48919700 | 0.32980400  | 1.95764000  | H  | -1.16053000 | -3.03405200 | 3.72676100  |
| C | -6.80889800 | -0.23826100 | 1.47984700  | C  | 0.73551100  | -5.05770100 | 1.74366500  |
| H | -7.67006700 | -1.14739300 | -0.27988200 | H  | 1.47683100  | -4.51899500 | -0.20942600 |
| H | -5.66493900 | 0.62974900  | 3.08834800  | H  | -0.13464700 | -5.31143500 | 3.70489800  |
| H | -7.76517800 | -0.11210500 | 1.98057400  | H  | 1.18288900  | -6.04848800 | 1.72867900  |
| C | -2.57637200 | -2.42305800 | -1.26979100 | C  | 5.51818200  | -2.49042400 | -1.72438800 |
| C | -3.37863400 | -3.45984200 | -0.77114400 | C  | 3.38570300  | -2.69612300 | -2.99787600 |
| C | -1.58622700 | -2.72256200 | -2.22192100 | C  | 4.88969500  | -2.44198600 | -3.11760800 |
| C | -3.21520500 | -4.76566800 | -1.23872700 | H  | 6.57091900  | -2.19375100 | -1.72331800 |
| H | -4.13122300 | -3.25418900 | -0.01725600 | H  | 3.20784000  | -3.73696600 | -2.68663400 |
| C | -1.43426300 | -4.02657300 | -2.69134600 | H  | 5.06035900  | -1.45333800 | -3.56544800 |
| H | -0.89561100 | -1.95773300 | -2.56483700 | N  | 3.45370100  | -1.31298100 | -0.91574000 |
| C | -2.25119700 | -5.05049500 | -2.20617000 | C  | 2.72007500  | -1.78680400 | -1.96096300 |
| H | -3.84351100 | -5.55903500 | -0.84269100 | C  | 4.78726800  | -1.59273600 | -0.72381400 |
| H | -0.66282800 | -4.24132500 | -3.42571600 | O  | 1.51550400  | -1.50980800 | -2.08801100 |
| H | -2.12790000 | -6.06691800 | -2.57061900 | O  | 5.39183600  | -1.14432800 | 0.25191300  |
| C | 1.19921300  | 2.80618600  | -1.38268000 | H  | 2.85752700  | -2.55663100 | -3.94582300 |
| C | 1.70991900  | 4.10785500  | -1.27363800 | H  | 5.35782000  | -3.17502800 | -3.78505200 |
| C | 2.00958000  | 1.79204200  | -1.91340000 | H  | 5.47920400  | -3.51797400 | -1.33206200 |
| C | 3.00553700  | 4.39414700  | -1.70532300 | Pd | -0.87086900 | 0.20773500  | 0.34709600  |
| H | 1.10103500  | 4.89992900  | -0.84876700 | P  | 2.35616900  | 0.38493100  | 1.39703600  |
| C | 3.30523100  | 2.08470700  | -2.34453200 | H  | 2.88723700  | -0.51954300 | 0.14215200  |
| H | 1.64006300  | 0.77123100  | -1.97749400 | C  | 3.01274800  | -1.73947600 | 2.93110900  |
| C | 3.80455100  | 3.38430000  | -2.24653500 | H  | 2.24408300  | -2.15617600 | 3.59053900  |
| H | 3.39091300  | 5.40661200  | -1.61530800 | H  | 2.91078800  | -2.22369400 | 1.95372300  |
| H | 3.92808700  | 1.28841800  | -2.74177400 | C  | 4.55526800  | 1.82019200  | 1.86421400  |
| H | 4.81414400  | 3.60831700  | -2.58141100 | H  | 4.69374700  | 1.47185900  | 2.89362200  |
| C | -1.10448500 | 3.77505500  | 0.12248600  | H  | 5.08561600  | 1.13112700  | 1.19806600  |

|                                           |             |             |             |    |             |             |             |
|-------------------------------------------|-------------|-------------|-------------|----|-------------|-------------|-------------|
| O                                         | 0.87217300  | 0.81502300  | 1.42447200  | H  | -4.36880600 | 0.66048600  | -0.60603000 |
| O                                         | 3.14169500  | 1.80455700  | 1.56009600  | C  | -4.73298300 | 0.50718700  | 3.25017500  |
| O                                         | 2.75363400  | -0.32538000 | 2.82235400  | H  | -3.10505200 | -0.88570600 | 3.21815600  |
| C                                         | 4.40830400  | -1.96366300 | 3.49117700  | C  | -5.58056100 | 1.32447600  | 2.50123300  |
| H                                         | 5.16001900  | -1.60625400 | 2.78182600  | H  | -6.09551300 | 2.01161800  | 0.52192600  |
| H                                         | 4.57403500  | -3.03393400 | 3.66719500  | H  | -4.83203500 | 0.46174900  | 4.33144800  |
| H                                         | 4.52962000  | -1.43627100 | 4.44372100  | H  | -6.34156700 | 1.92113600  | 2.99662100  |
| C                                         | 5.05006900  | 3.24665600  | 1.69877800  | C  | 2.61329400  | -0.80638600 | 1.94658400  |
| H                                         | 6.11773900  | 3.30329800  | 1.94230500  | C  | 3.93975100  | -1.22903400 | 2.10989400  |
| H                                         | 4.50548900  | 3.92420400  | 2.36521300  | C  | 2.16171300  | 0.30745300  | 2.66884900  |
| H                                         | 4.90630600  | 3.58784100  | 0.66901400  | C  | 4.79149200  | -0.55814300 | 2.98866500  |
|                                           |             |             |             | H  | 4.31526200  | -2.07382500 | 1.54014000  |
|                                           |             |             |             | C  | 3.01221600  | 0.97569100  | 3.55050300  |
| <b>7c</b>                                 |             |             |             | H  | 1.14699800  | 0.66720700  | 2.52079300  |
| SCF energy: -2965.002221                  |             |             |             | C  | 4.32921400  | 0.54288600  | 3.71316900  |
| SCF energy in solution: -2964.1691861400  |             |             |             | H  | 5.81905400  | -0.89359600 | 3.10295600  |
| Free energy in solution: -2963.5304041400 |             |             |             | H  | 2.65029900  | 1.84325400  | 4.09575400  |
| P                                         | 1.41492600  | -1.70754300 | 0.86949600  | H  | 4.99537500  | 1.06622500  | 4.39398800  |
| C                                         | -2.10457000 | -2.70483400 | 1.39988000  | C  | 2.44948400  | -2.55833400 | -0.39620400 |
| H                                         | -1.70712000 | -2.40619300 | 2.37514300  | C  | 2.97552300  | -3.84916200 | -0.21857000 |
| H                                         | -3.10605100 | -3.11094900 | 1.57814200  | C  | 2.71701500  | -1.87114100 | -1.59447200 |
| C                                         | 0.92556000  | -3.05600800 | 2.08233100  | C  | 3.74169000  | -4.44783700 | -1.22109500 |
| H                                         | 1.83551600  | -3.48131000 | 2.52215600  | H  | 2.80196500  | -4.39621100 | 0.70296800  |
| H                                         | 0.44088500  | -2.50490500 | 2.89846300  | C  | 3.48780600  | -2.47428000 | -2.58956000 |
| C                                         | -1.18436800 | -3.75083400 | 0.72448800  | H  | 2.34267700  | -0.85793400 | -1.72090200 |
| H                                         | -0.80267000 | -3.37054300 | -0.23088100 | C  | 3.99626000  | -3.76240300 | -2.41015300 |
| H                                         | -1.77723600 | -4.63509300 | 0.46596400  | H  | 4.13976400  | -5.44797200 | -1.06946000 |
| C                                         | 0.01049900  | -4.19031000 | 1.58312300  | H  | 3.69227400  | -1.92920300 | -3.50718300 |
| H                                         | -0.35076500 | -4.74173900 | 2.46276400  | H  | 4.59231300  | -4.22910600 | -3.19020900 |
| H                                         | 0.59947200  | -4.90342200 | 0.99561800  | O  | -1.73583100 | 1.29666300  | -2.09487700 |
| P                                         | -2.27521600 | -1.16223900 | 0.36965800  | C  | -1.37726600 | 1.40782000  | -0.93949100 |
| C                                         | -3.07967400 | -1.82124600 | -1.14996300 | C  | -1.62915400 | 2.67680300  | -0.17140300 |
| C                                         | -4.35611000 | -2.40721300 | -1.09489900 | C  | -1.28275100 | 2.80582400  | 1.17821600  |
| C                                         | -2.38674400 | -1.80252900 | -2.36874700 | C  | -2.23322600 | 3.75729000  | -0.83530600 |
| C                                         | -4.92417200 | -2.96857200 | -2.23715300 | C  | -1.53581700 | 3.99503400  | 1.86069200  |
| H                                         | -4.91323400 | -2.41488400 | -0.16166100 | H  | -0.80824100 | 1.96799900  | 1.68157200  |
| C                                         | -2.95866900 | -2.36840900 | -3.51123500 | C  | -2.48108400 | 4.94671100  | -0.15589300 |
| H                                         | -1.41303300 | -1.32736700 | -2.42718100 | H  | -2.49357000 | 3.64205300  | -1.88276100 |
| C                                         | -4.22406700 | -2.95121100 | -3.44739600 | C  | -2.13356500 | 5.06672700  | 1.19406700  |
| H                                         | -5.91260900 | -3.41722000 | -2.18413000 | H  | -1.26109800 | 4.08913400  | 2.90780700  |
| H                                         | -2.41459700 | -2.34262300 | -4.45114400 | H  | -2.94315100 | 5.78258100  | -0.67491800 |
| H                                         | -4.66879300 | -3.38727200 | -4.33801200 | H  | -2.32634100 | 5.99622200  | 1.72375000  |
| C                                         | -3.61271700 | -0.22116200 | 1.21791000  | Pd | -0.28804000 | -0.07902700 | -0.07084500 |
| C                                         | -4.46680900 | 0.61014400  | 0.47419300  | P  | 2.10407700  | 2.28427900  | -0.65385800 |
| C                                         | -3.75434800 | -0.25881100 | 2.61416400  | C  | 1.22903500  | 3.60051800  | -2.81065100 |
| C                                         | -5.44347500 | 1.37406900  | 1.11250700  | H  | 0.40699300  | 2.94148200  | -3.12313100 |

|                                           |             |             |             |   |             |             |             |
|-------------------------------------------|-------------|-------------|-------------|---|-------------|-------------|-------------|
| H                                         | 0.82210400  | 4.30003100  | -2.06260400 | C | -3.35605600 | -0.82152600 | 1.41445100  |
| C                                         | 4.71584300  | 2.72848100  | -0.46374200 | C | -4.44535900 | -0.44150700 | 0.61333200  |
| H                                         | 4.80480800  | 3.23160200  | -1.43584500 | C | -3.42500300 | -0.58842600 | 2.79827300  |
| H                                         | 4.46656900  | 3.49935500  | 0.28399500  | C | -5.57804400 | 0.13764600  | 1.18714500  |
| O                                         | 1.40340000  | 0.87000700  | -0.82863200 | H | -4.40439700 | -0.59108900 | -0.46015000 |
| O                                         | 3.68862900  | 1.74230700  | -0.52330900 | C | -4.55958100 | -0.01074700 | 3.36905000  |
| O                                         | 2.28500500  | 2.82684600  | -2.24892300 | H | -2.59245000 | -0.85514800 | 3.44369000  |
| C                                         | 1.77052200  | 4.37126500  | -4.00689100 | C | -5.64150500 | 0.35174200  | 2.56494700  |
| H                                         | 2.57454000  | 5.04798300  | -3.69722300 | H | -6.41215600 | 0.42316100  | 0.55171300  |
| H                                         | 0.97638000  | 4.96458000  | -4.47689600 | H | -4.59602100 | 0.15550600  | 4.44247400  |
| H                                         | 2.17585400  | 3.68130100  | -4.75488500 | H | -6.52522500 | 0.80199600  | 3.00884400  |
| C                                         | 6.02351700  | 2.04360200  | -0.09356900 | C | 2.79691900  | 0.42262000  | 1.82075800  |
| H                                         | 6.84076800  | 2.77392400  | -0.04513300 | C | 4.15009900  | 0.70467300  | 1.59105400  |
| H                                         | 6.28065300  | 1.28395800  | -0.83964900 | C | 2.08592800  | 1.22331500  | 2.73203900  |
| H                                         | 5.93457400  | 1.54965600  | 0.87957000  | C | 4.78035600  | 1.75153800  | 2.26917600  |
|                                           |             |             |             | H | 4.71431600  | 0.11085600  | 0.87995600  |
|                                           |             |             |             | C | 2.71786700  | 2.26524200  | 3.41148600  |
| <b>8c</b>                                 |             |             |             | H | 1.02959200  | 1.03655100  | 2.91074400  |
| SCF energy: -2965.025613                  |             |             |             | C | 4.06995500  | 2.53175300  | 3.18236300  |
| SCF energy in solution: -2964.1967967700  |             |             |             | H | 5.83095800  | 1.95569700  | 2.07987900  |
| Free energy in solution: -2963.5531257700 |             |             |             | H | 2.15320200  | 2.86941200  | 4.11698300  |
| P                                         | 1.88834700  | -0.95338200 | 0.97969900  | H | 4.56380900  | 3.34371500  | 3.70924700  |
| C                                         | -1.38021700 | -2.90389100 | 1.82683500  | C | 3.18401400  | -1.93538200 | 0.11326400  |
| H                                         | -1.24480100 | -2.49379300 | 2.83339700  | C | 4.19013600  | -2.61572600 | 0.82544000  |
| H                                         | -2.25022700 | -3.56694500 | 1.87772900  | C | 3.15570500  | -2.03068300 | -1.28689900 |
| C                                         | 1.52899500  | -1.99418300 | 2.50473300  | C | 5.14251600  | -3.37993800 | 0.15321800  |
| H                                         | 2.41551500  | -1.97223700 | 3.14878800  | H | 4.24035400  | -2.54510200 | 1.90870400  |
| H                                         | 0.74922300  | -1.44767500 | 3.04840900  | C | 4.11643200  | -2.79714100 | -1.95468600 |
| C                                         | -0.11773200 | -3.67599700 | 1.37697900  | H | 2.40849300  | -1.49075200 | -1.86453600 |
| H                                         | 0.14086500  | -3.42298100 | 0.34119300  | C | 5.10467500  | -3.47397200 | -1.24134000 |
| H                                         | -0.34083300 | -4.74908900 | 1.36509800  | H | 5.91319900  | -3.89984500 | 0.71648400  |
| C                                         | 1.10688300  | -3.45440700 | 2.27698800  | H | 4.08609300  | -2.85564700 | -3.03916600 |
| H                                         | 0.90724000  | -3.89433100 | 3.26478400  | H | 5.84701500  | -4.07022400 | -1.76574800 |
| H                                         | 1.95256400  | -4.01202800 | 1.85821100  | O | -2.39899900 | 0.84523900  | -1.73449100 |
| P                                         | -1.81486200 | -1.50348600 | 0.66248000  | C | -1.66406200 | 1.18669500  | -0.82487100 |
| C                                         | -2.38844300 | -2.46204600 | -0.80650900 | C | -1.93070000 | 2.47712800  | -0.08648800 |
| C                                         | -3.46723200 | -3.35795000 | -0.71079300 | C | -1.05332100 | 2.97253800  | 0.88465900  |
| C                                         | -1.70489400 | -2.34548900 | -2.02624200 | C | -3.10166500 | 3.19250400  | -0.38232800 |
| C                                         | -3.85307400 | -4.12230100 | -1.81073700 | C | -1.33604900 | 4.16486000  | 1.55161000  |
| H                                         | -4.01898800 | -3.45102500 | 0.22113800  | H | -0.13923000 | 2.42299300  | 1.09515500  |
| C                                         | -2.09098400 | -3.11835800 | -3.12484800 | C | -3.38690700 | 4.38108300  | 0.28469400  |
| H                                         | -0.87873400 | -1.64738200 | -2.12987500 | H | -3.76955700 | 2.79775200  | -1.14136100 |
| C                                         | -3.16241100 | -4.00476700 | -3.02056300 | C | -2.50458000 | 4.86969800  | 1.25408200  |
| H                                         | -4.69201300 | -4.80794400 | -1.72413900 | H | -0.64360800 | 4.54676800  | 2.29756100  |
| H                                         | -1.55285500 | -3.01480200 | -4.06281200 | H | -4.29529800 | 4.93062100  | 0.05060100  |
| H                                         | -3.46338100 | -4.60093900 | -3.87813000 | H | -2.72664900 | 5.79899700  | 1.77276300  |

|                                           |             |             |             |   |             |             |             |
|-------------------------------------------|-------------|-------------|-------------|---|-------------|-------------|-------------|
| Pd                                        | -0.10658400 | 0.02058900  | -0.13676600 | C | -3.65022600 | -1.19217300 | 4.33013600  |
| P                                         | 1.07205700  | 1.05749900  | -1.88329100 | H | -2.21141100 | 0.38186700  | 4.64249500  |
| C                                         | -0.26479700 | 2.37714000  | -3.82110200 | H | -4.97307900 | -2.78740900 | 3.71788700  |
| H                                         | 0.31640600  | 1.71708400  | -4.47103400 | H | -4.07805900 | -1.11260300 | 5.32633900  |
| H                                         | -1.27804000 | 1.96894100  | -3.72957100 | C | -3.26993700 | -1.48170800 | -1.03454400 |
| C                                         | 2.68173300  | 3.02138400  | -0.90131900 | C | -3.31301100 | -2.22268800 | -2.22643400 |
| H                                         | 1.95165700  | 3.70093200  | -1.35100000 | C | -4.34414100 | -0.62842700 | -0.73656900 |
| H                                         | 2.49178900  | 2.96721000  | 0.17828100  | C | -4.40926700 | -2.12998800 | -3.08573100 |
| O                                         | 1.30302100  | 0.00735300  | -2.94212500 | H | -2.49175000 | -2.88042000 | -2.49585400 |
| O                                         | 2.53665400  | 1.71193100  | -1.47415800 | C | -5.43667100 | -0.53238000 | -1.59873100 |
| O                                         | 0.33405500  | 2.40374400  | -2.50912000 | H | -4.32945200 | -0.03895200 | 0.17475700  |
| C                                         | -0.29934700 | 3.79963100  | -4.35644000 | C | -5.47586900 | -1.28581900 | -2.77334200 |
| H                                         | -0.86481600 | 4.45422900  | -3.68440600 | H | -4.42825800 | -2.71998500 | -3.99846400 |
| H                                         | -0.78130100 | 3.81801400  | -5.34155200 | H | -6.25892700 | 0.13284100  | -1.34931000 |
| H                                         | 0.71376700  | 4.20318100  | -4.45948400 | H | -6.33005600 | -1.21417900 | -3.44128800 |
| C                                         | 4.09946000  | 3.50156500  | -1.17110600 | C | 3.27216600  | -0.96485600 | -1.54847800 |
| H                                         | 4.25418500  | 4.49171500  | -0.72519000 | C | 4.03970300  | 0.16656800  | -1.22439800 |
| H                                         | 4.28325200  | 3.57054000  | -2.24818700 | C | 3.49657800  | -1.60616600 | -2.77557400 |
| H                                         | 4.83068900  | 2.81050200  | -0.74023800 | C | 5.02343400  | 0.62659200  | -2.09790900 |
|                                           |             |             |             | H | 3.85556800  | 0.69922500  | -0.29554800 |
|                                           |             |             |             | C | 4.48110400  | -1.13953000 | -3.65046000 |
| <b>TS6c</b>                               |             |             |             | H | 2.90761700  | -2.47126100 | -3.06450500 |
| SCF energy: -2964.958412                  |             |             |             | C | 5.25030800  | -0.02653800 | -3.31183200 |
| SCF energy in solution: -2964.12778756    |             |             |             | H | 5.60743800  | 1.50326500  | -1.83190600 |
| Free energy in solution: -2963.4892445600 |             |             |             | H | 4.64452400  | -1.65042900 | -4.59580300 |
|                                           |             |             |             | H | 6.01629400  | 0.33535600  | -3.99230100 |
| P                                         | 1.94696500  | -1.48785800 | -0.37411900 | C | 2.86445400  | -1.63060100 | 1.21908400  |
| C                                         | -1.34844100 | -3.36342800 | 0.03693400  | C | 4.02137600  | -2.42732200 | 1.29762800  |
| H                                         | -1.10076100 | -3.61941100 | -0.99856100 | C | 2.40587700  | -0.96255300 | 2.36238000  |
| H                                         | -2.23727900 | -3.94742800 | 0.29585900  | C | 4.69911200  | -2.56545400 | 2.50709900  |
| C                                         | 1.66598400  | -3.27964300 | -0.84675500 | H | 4.40132800  | -2.93077300 | 0.41208100  |
| H                                         | 2.62108500  | -3.69926500 | -1.18329800 | C | 3.09558400  | -1.10280000 | 3.57195100  |
| H                                         | 1.00442700  | -3.26782500 | -1.72074700 | H | 1.54310900  | -0.30244900 | 2.28956800  |
| C                                         | -0.16527100 | -3.69442100 | 0.97760700  | C | 4.23362500  | -1.90414900 | 3.64868600  |
| H                                         | 0.09626800  | -2.82426200 | 1.59166800  | H | 5.59218100  | -3.18289900 | 2.55877400  |
| H                                         | -0.47717800 | -4.46627900 | 1.69015100  | H | 2.74097000  | -0.57115200 | 4.45082800  |
| C                                         | 1.09680400  | -4.19202700 | 0.25658700  | H | 4.76590300  | -2.00911800 | 4.59064700  |
| H                                         | 0.89011700  | -5.16877600 | -0.20343600 | O | 1.40171100  | 1.82773000  | -2.55628500 |
| H                                         | 1.87574000  | -4.36379200 | 1.00797800  | C | 0.73454100  | 1.22991200  | -1.82091100 |
| P                                         | -1.79796000 | -1.55021500 | 0.08031900  | C | -1.21437700 | 1.41321900  | -1.72305900 |
| C                                         | -2.54621900 | -1.39778100 | 1.75973900  | C | -1.67425200 | 2.54351200  | -1.03464700 |
| C                                         | -2.04789500 | -0.45005300 | 2.66524100  | C | -1.81411800 | 1.02027000  | -2.92873000 |
| C                                         | -3.60602000 | -2.23713700 | 2.15079000  | C | -2.76752100 | 3.25044700  | -1.54428000 |
| C                                         | -2.60390600 | -0.35518300 | 3.94675100  | H | -1.18584200 | 2.87450600  | -0.12249600 |
| H                                         | -1.23252400 | 0.21063400  | 2.37111400  | C | -2.90197200 | 1.73700900  | -3.42849600 |
| C                                         | -4.15356600 | -2.13508400 | 3.42736600  | H | -1.43069500 | 0.16564000  | -3.47809100 |
| H                                         | -4.01742400 | -2.96225300 | 1.45320900  |   |             |             |             |

|                                           |             |             |             |   |             |             |             |
|-------------------------------------------|-------------|-------------|-------------|---|-------------|-------------|-------------|
| C                                         | -3.38058100 | 2.85158700  | -2.73440200 | C | -4.50179000 | -1.62038400 | 2.48390700  |
| H                                         | -3.13030600 | 4.12504000  | -1.00977900 | H | -4.13347400 | 0.30608900  | 1.60603100  |
| H                                         | -3.37017100 | 1.42779300  | -4.35924200 | C | -5.23731500 | -3.35690000 | 0.97400100  |
| H                                         | -4.22330100 | 3.41461000  | -3.12789800 | H | -5.43557300 | -2.78012100 | -1.09299200 |
| Pd                                        | 0.01431500  | -0.03395500 | -0.60996400 | C | -4.90224800 | -2.94210500 | 2.26330800  |
| P                                         | 0.93359800  | 2.54507900  | 1.93885900  | H | -4.25341600 | -1.28702600 | 3.48855500  |
| C                                         | -1.15787200 | 3.98275700  | 2.80842700  | H | -5.55881100 | -4.37990600 | 0.79595200  |
| H                                         | -1.99863100 | 3.27092700  | 2.81595500  | H | -4.96130200 | -3.63999300 | 3.09447800  |
| H                                         | -0.60947000 | 3.84475600  | 3.75495000  | C | -5.44376100 | 1.53071800  | -0.69617100 |
| C                                         | 2.35418100  | 4.27064200  | 0.47858100  | C | -6.84004500 | 1.63080600  | -0.82572700 |
| H                                         | 1.58530900  | 5.02088600  | 0.25187100  | C | -4.75502200 | 2.59616900  | -0.09301700 |
| H                                         | 2.77463000  | 4.52503600  | 1.46479400  | C | -7.52950800 | 2.74722200  | -0.35314500 |
| O                                         | 0.30278200  | 1.18469900  | 1.52554700  | H | -7.39031100 | 0.82553500  | -1.30728800 |
| O                                         | 1.75787800  | 2.97499300  | 0.51456100  | C | -5.44392400 | 3.71984800  | 0.37155300  |
| O                                         | -0.30832900 | 3.72224300  | 1.70048400  | H | -3.67517500 | 2.56103000  | 0.01813200  |
| C                                         | -1.68406900 | 5.40987500  | 2.71844600  | C | -6.83149300 | 3.79798900  | 0.24649600  |
| H                                         | -0.85520900 | 6.12544600  | 2.74334900  | H | -8.60971800 | 2.80133800  | -0.46189300 |
| H                                         | -2.36109300 | 5.62964400  | 3.55341100  | H | -4.89234400 | 4.53452400  | 0.83442500  |
| H                                         | -2.23266000 | 5.56011500  | 1.78168300  | H | -7.36489100 | 4.67311500  | 0.60828400  |
| C                                         | 3.45086000  | 4.29324500  | -0.57693400 | C | 1.05013800  | -2.72874200 | 1.35337800  |
| H                                         | 3.89574500  | 5.29371800  | -0.64669500 | C | 2.38792800  | -3.08119000 | 1.60837300  |
| H                                         | 3.04807000  | 4.02248800  | -1.55834200 | C | 0.07668900  | -2.99403900 | 2.33012400  |
| H                                         | 4.24440700  | 3.58028900  | -0.32507400 | C | 2.73211900  | -3.70220500 | 2.80878200  |
|                                           |             |             |             | H | 3.15650000  | -2.85167800 | 0.87593000  |
|                                           |             |             |             | C | 0.43110900  | -3.61122500 | 3.53246000  |
| <b>9c</b>                                 |             |             |             | H | -0.96242600 | -2.72713500 | 2.16620200  |
| SCF energy: -2965.006762                  |             |             |             | C | 1.75754800  | -3.96978900 | 3.77349800  |
| SCF energy in solution: -2964.1604512000  |             |             |             | H | 3.76917000  | -3.97079000 | 2.99104300  |
| Free energy in solution: -2963.5225632000 |             |             |             | H | -0.33449400 | -3.81327100 | 4.27716500  |
| P                                         | 0.64385600  | -1.85127200 | -0.21796300 | H | 2.03119900  | -4.45197900 | 4.70838700  |
| C                                         | -2.83645600 | 0.48007300  | -1.37293700 | C | 1.31330900  | -2.93722500 | -1.54347100 |
| H                                         | -2.79907700 | 1.48830200  | -1.80166000 | C | 1.18189000  | -4.33288300 | -1.47020900 |
| H                                         | -2.45219800 | 0.56894200  | -0.35156200 | C | 1.89868600  | -2.36565300 | -2.68059500 |
| C                                         | -1.20054800 | -2.14749400 | -0.38757700 | C | 1.62423500  | -5.13935800 | -2.51864500 |
| H                                         | -1.37488400 | -3.19620600 | -0.11832400 | H | 0.74507400  | -4.79273400 | -0.58779800 |
| H                                         | -1.71195700 | -1.54090100 | 0.36724000  | C | 2.33510900  | -3.17367500 | -3.73192500 |
| C                                         | -1.92732400 | -0.42438500 | -2.22594300 | H | 2.03452800  | -1.29043500 | -2.72979700 |
| H                                         | -0.93033100 | 0.03783400  | -2.25447400 | C | 2.19896400  | -4.56016700 | -3.65277100 |
| H                                         | -2.29625400 | -0.41854400 | -3.25993800 | H | 1.52269500  | -6.21919300 | -2.44876000 |
| C                                         | -1.80258300 | -1.89081300 | -1.78203600 | H | 2.79347700  | -2.71905100 | -4.60599900 |
| H                                         | -2.79918700 | -2.34997800 | -1.78992000 | H | 2.54532700  | -5.18929900 | -4.46852600 |
| H                                         | -1.21661200 | -2.43556800 | -2.53166600 | O | -0.32852300 | 2.20097600  | -0.10833800 |
| P                                         | -4.65238100 | -0.00677500 | -1.37211400 | C | 0.87729500  | 2.45925100  | -0.02122000 |
| C                                         | -4.75158700 | -1.12950900 | 0.11202600  | C | 1.38545900  | 3.83751100  | 0.11879900  |
| C                                         | -4.42929600 | -0.72288700 | 1.41755300  | C | 2.76343300  | 4.09549000  | 0.16081100  |
| C                                         | -5.16640200 | -2.45429100 | -0.09094500 | C | 0.46823000  | 4.90272400  | 0.21359700  |

|                                           |             |             |             |   |             |             |             |
|-------------------------------------------|-------------|-------------|-------------|---|-------------|-------------|-------------|
| C                                         | 3.21846200  | 5.40733800  | 0.29847700  | P | 4.90088300  | -0.05172400 | 1.25402800  |
| H                                         | 3.46182100  | 3.26948700  | 0.07490800  | C | 4.85702700  | -1.18042700 | -0.22883300 |
| C                                         | 0.92911700  | 6.20681700  | 0.35223800  | C | 4.50825200  | -0.75702500 | -1.52222700 |
| H                                         | -0.59467700 | 4.68586400  | 0.17766900  | C | 5.19239400  | -2.52922500 | -0.03651100 |
| C                                         | 2.30579300  | 6.45978900  | 0.39516100  | C | 4.48018800  | -1.65973400 | -2.58620900 |
| H                                         | 4.28581900  | 5.60788700  | 0.33119400  | H | 4.27109500  | 0.28775300  | -1.70519300 |
| H                                         | 0.22216300  | 7.02858600  | 0.42688300  | C | 5.16396300  | -3.43659600 | -1.09954000 |
| H                                         | 2.66424200  | 7.48015100  | 0.50389800  | H | 5.47893200  | -2.87018500 | 0.95562900  |
| Pd                                        | 1.26575800  | 0.50895200  | -0.14445200 | C | 4.80514900  | -3.00361400 | -2.37634100 |
| P                                         | 3.50690200  | 0.12556600  | 0.04179200  | H | 4.21307700  | -1.31304200 | -3.58150500 |
| C                                         | 4.68667800  | 1.49683400  | -1.90940800 | H | 5.42675600  | -4.47761300 | -0.92974400 |
| H                                         | 5.00351100  | 0.51696900  | -2.28052500 | H | 4.78639400  | -3.70524600 | -3.20625600 |
| H                                         | 3.76047300  | 1.78109400  | -2.43071100 | C | 5.82473900  | 1.40338600  | 0.56566400  |
| C                                         | 3.63626600  | 1.23216600  | 2.50951300  | C | 7.21870100  | 1.40709000  | 0.74505800  |
| H                                         | 4.25570600  | 2.09942100  | 2.24867300  | C | 5.23660800  | 2.49393000  | -0.09695400 |
| H                                         | 2.58171800  | 1.51716500  | 2.39669500  | C | 8.00400600  | 2.45475900  | 0.26358000  |
| O                                         | 3.96315300  | -1.16284000 | -0.57767400 | H | 7.69079700  | 0.58134800  | 1.27261700  |
| O                                         | 3.94287000  | 0.15028800  | 1.61993300  | C | 6.02112400  | 3.54866000  | -0.57029100 |
| O                                         | 4.42705500  | 1.40078600  | -0.49712900 | H | 4.16210900  | 2.53228100  | -0.25021100 |
| C                                         | 5.76848900  | 2.54180800  | -2.12880100 | C | 7.40567700  | 3.53112400  | -0.39487400 |
| H                                         | 5.44571500  | 3.52555400  | -1.77102000 | H | 9.08075200  | 2.43535700  | 0.41132100  |
| H                                         | 5.99795400  | 2.62510400  | -3.19751800 | H | 5.54660400  | 4.38418900  | -1.07880800 |
| H                                         | 6.68405000  | 2.26304200  | -1.59745100 | H | 8.01371600  | 4.35297400  | -0.76379900 |
| C                                         | 3.91893600  | 0.76872900  | 3.92913100  | C | -1.25647700 | -2.57124300 | -1.08640500 |
| H                                         | 3.70162000  | 1.57540300  | 4.63911500  | C | -2.58282700 | -3.03610000 | -1.09699300 |
| H                                         | 4.96981000  | 0.48215800  | 4.03938700  | C | -0.41234600 | -2.87525500 | -2.16749600 |
| H                                         | 3.29809500  | -0.09723500 | 4.18044500  | C | -3.04091400 | -3.81123900 | -2.16249900 |
|                                           |             |             |             | H | -3.25843100 | -2.77462400 | -0.28772600 |
|                                           |             |             |             | C | -0.88180400 | -3.64543200 | -3.23312900 |
| <b>TS7c</b>                               |             |             |             | H | 0.61386800  | -2.52095200 | -2.18788700 |
| SCF energy: -2964.968598                  |             |             |             | C | -2.19505300 | -4.11848800 | -3.23064800 |
| SCF energy in solution: -2964.1306125400  |             |             |             | H | -4.06772000 | -4.16592100 | -2.15837500 |
| Free energy in solution: -2963.4923735400 |             |             |             | H | -0.21749000 | -3.87723100 | -4.06143900 |
| P                                         | -0.68374900 | -1.50535700 | 0.30004800  | H | -2.55845500 | -4.72073500 | -4.05918700 |
| C                                         | 3.14248300  | 0.61636200  | 1.28856900  | C | -1.26389500 | -2.33999000 | 1.82700400  |
| H                                         | 3.22108000  | 1.62066900  | 1.72333200  | C | -1.16533800 | -3.73464400 | 1.95625500  |
| H                                         | 2.75620300  | 0.74906200  | 0.27409100  | C | -1.72925800 | -1.58255000 | 2.90862900  |
| C                                         | 1.16618500  | -1.82722600 | 0.33905300  | C | -1.52432000 | -4.35677900 | 3.15152000  |
| H                                         | 1.28536500  | -2.87285800 | 0.03181000  | H | -0.82021300 | -4.33768200 | 1.12095800  |
| H                                         | 1.63358500  | -1.21562500 | -0.43937800 | C | -2.08176700 | -2.20673200 | 4.10575400  |
| C                                         | 2.16032800  | -0.19948100 | 2.15043500  | H | -1.84064400 | -0.50860600 | 2.80335100  |
| H                                         | 1.21390700  | 0.35595100  | 2.20753700  | C | -1.98039500 | -3.59281000 | 4.22872700  |
| H                                         | 2.55005300  | -0.24643100 | 3.17562200  | H | -1.45102000 | -5.43738300 | 3.23988300  |
| C                                         | 1.88353200  | -1.64000400 | 1.69178000  | H | -2.45212100 | -1.61012800 | 4.93465100  |
| H                                         | 2.83724500  | -2.17668000 | 1.61868600  | H | -2.26316400 | -4.07917800 | 5.15849300  |
| H                                         | 1.31289800  | -2.15475300 | 2.47254400  | O | 1.14936200  | 2.23852300  | -0.88202900 |



|                                           |             |             |             |   |             |             |             |
|-------------------------------------------|-------------|-------------|-------------|---|-------------|-------------|-------------|
| C                                         | 0.13665000  | 1.83202400  | -0.44200300 | H | 2.60504500  | 0.08583500  | 3.05416800  |
| C                                         | -1.31311000 | 2.93430900  | -0.34154000 | C | 1.89080500  | -1.40455500 | 1.68995900  |
| C                                         | -1.44608700 | 3.65556600  | 0.85605900  | H | 2.81812900  | -1.99019500 | 1.67975500  |
| C                                         | -1.78505500 | 3.48980400  | -1.54161100 | H | 1.29088700  | -1.81656800 | 2.50830700  |
| C                                         | -2.06828500 | 4.90503800  | 0.85683900  | P | 4.99538500  | -0.06700000 | 1.18053800  |
| H                                         | -1.05477200 | 3.24460400  | 1.78357100  | C | 4.90597700  | -1.27209600 | -0.23759700 |
| C                                         | -2.40303900 | 4.73881400  | -1.53849100 | C | 4.62352200  | -0.89749700 | -1.56174500 |
| H                                         | -1.65970100 | 2.94978600  | -2.47595100 | C | 5.13427700  | -2.62879100 | 0.03749600  |
| C                                         | -2.54812800 | 5.44440100  | -0.33940100 | C | 4.55452800  | -1.85353900 | -2.57588900 |
| H                                         | -2.17255000 | 5.45910100  | 1.78590000  | H | 4.47508800  | 0.15070500  | -1.80860400 |
| H                                         | -2.77083200 | 5.16447900  | -2.46833000 | C | 5.06458500  | -3.58962600 | -0.97550900 |
| H                                         | -3.02626900 | 6.42025400  | -0.34014200 | H | 5.36948700  | -2.93357400 | 1.05452900  |
| Pd                                        | -1.37924800 | 0.71261400  | -0.01635200 | C | 4.77177000  | -3.20373700 | -2.28385800 |
| P                                         | -3.71643600 | 0.17795300  | 0.10595700  | H | 4.34062400  | -1.54467900 | -3.59615000 |
| C                                         | -4.91483500 | 2.02045000  | 1.62272500  | H | 5.24400700  | -4.63596000 | -0.74213400 |
| H                                         | -5.35194300 | 1.19004200  | 2.18784600  | H | 4.72115600  | -3.94762500 | -3.07462200 |
| H                                         | -3.99480400 | 2.33664800  | 2.13794800  | C | 6.05230000  | 1.26796500  | 0.44214300  |
| C                                         | -4.16470400 | 0.65360700  | -2.51642700 | C | 7.43857300  | 1.15620500  | 0.64554200  |
| H                                         | -4.69062000 | 1.59021400  | -2.29567800 | C | 5.57421900  | 2.37351200  | -0.28025700 |
| H                                         | -3.10742900 | 0.89252100  | -2.70426800 | C | 8.32078500  | 2.10512300  | 0.12882500  |
| O                                         | -4.15546500 | -0.88946000 | 1.07164600  | H | 7.82800200  | 0.31840400  | 1.21952900  |
| O                                         | -4.27135600 | -0.23176300 | -1.39844100 | C | 6.45561400  | 3.33049000  | -0.78932400 |
| O                                         | -4.60060000 | 1.58010400  | 0.29634500  | H | 4.50933600  | 2.50074200  | -0.45111800 |
| C                                         | -5.88374500 | 3.18767800  | 1.52117400  | C | 7.83046800  | 3.19758300  | -0.58984200 |
| H                                         | -5.43415100 | 4.01553500  | 0.96253400  | H | 9.38931700  | 1.99689600  | 0.29602400  |
| H                                         | -6.15177400 | 3.54738700  | 2.52197300  | H | 6.06480300  | 4.18006400  | -1.34358700 |
| H                                         | -6.79984900 | 2.88093600  | 1.00587100  | H | 8.51466300  | 3.94310100  | -0.98621800 |
| C                                         | -4.76955600 | -0.03898600 | -3.72777700 | C | -1.21430900 | -2.49581900 | -1.06720600 |
| H                                         | -4.70398900 | 0.60892600  | -4.61022100 | C | -2.52143400 | -3.01199400 | -1.07535000 |
| H                                         | -5.82334600 | -0.27447200 | -3.54670100 | C | -0.35596200 | -2.79118200 | -2.13955800 |
| H                                         | -4.24012600 | -0.97373900 | -3.93961500 | C | -2.94504500 | -3.82634000 | -2.12559300 |
|                                           |             |             |             | H | -3.20931700 | -2.75949700 | -0.27427400 |
|                                           |             |             |             | C | -0.79121500 | -3.59872700 | -3.19246300 |
| <b>10c</b>                                |             |             |             | H | 0.65839400  | -2.40427300 | -2.16301700 |
| SCF energy: -2964.989376                  |             |             |             | C | -2.08482000 | -4.12218200 | -3.18553000 |
| SCF energy in solution: -2964.1490236400  |             |             |             | H | -3.95719100 | -4.22127100 | -2.11723300 |
| Free energy in solution: -2963.5128566400 |             |             |             | H | -0.11432000 | -3.82156800 | -4.01307800 |
| P                                         | -0.68517700 | -1.37759100 | 0.29859400  | H | -2.42154700 | -4.75472800 | -4.00269400 |
| C                                         | 3.28942400  | 0.72906700  | 1.11525800  | C | -1.22776800 | -2.21783000 | 1.84057200  |
| H                                         | 3.42711900  | 1.76022300  | 1.46284200  | C | -1.12106800 | -3.61043800 | 1.97976700  |
| H                                         | 2.93907100  | 0.79172900  | 0.07961100  | C | -1.67077900 | -1.45478300 | 2.92853300  |
| C                                         | 1.17404100  | -1.67742200 | 0.35090700  | C | -1.45240100 | -4.22530800 | 3.18720400  |
| H                                         | 1.30431100  | -2.73663600 | 0.10148300  | H | -0.79175300 | -4.21864700 | 1.14197800  |
| H                                         | 1.63901900  | -1.10989500 | -0.46245000 | C | -1.99420900 | -2.07057700 | 4.13820100  |
| C                                         | 2.23847300  | 0.05596400  | 2.02005500  | H | -1.78510300 | -0.38104400 | 2.82063300  |
| H                                         | 1.32552000  | 0.66816100  | 2.00601800  | C | -1.88707200 | -3.45579900 | 4.26894700  |

|                                           |             |             |             |   |             |             |             |
|-------------------------------------------|-------------|-------------|-------------|---|-------------|-------------|-------------|
| H                                         | -1.37337200 | -5.30507900 | 3.28150900  | H | -0.67759000 | -3.68649400 | -1.61053900 |
| H                                         | -2.34516800 | -1.46842500 | 4.97167300  | H | 0.26307900  | -2.27847500 | -2.10561800 |
| H                                         | -2.14726600 | -3.93617000 | 5.20839600  | C | 1.62155000  | -1.88990000 | 0.38093200  |
| O                                         | 1.11603600  | 2.34576100  | -1.05162000 | H | 0.98827000  | -1.01781200 | 0.59277200  |
| C                                         | 0.28597400  | 1.77870300  | -0.50186500 | H | 2.06595100  | -2.18284600 | 1.33947600  |
| C                                         | -2.09773500 | 2.94238100  | 0.03602800  | C | 0.75501700  | -3.05991600 | -0.12251000 |
| C                                         | -2.08768000 | 3.59835200  | 1.27732900  | H | 1.41561700  | -3.86212000 | -0.48009100 |
| C                                         | -2.45373900 | 3.67955300  | -1.10096200 | H | 0.20195100  | -3.48232600 | 0.72391900  |
| C                                         | -2.44963000 | 4.94651100  | 1.38187200  | P | 3.70300300  | 0.00428300  | 0.04766000  |
| H                                         | -1.79992200 | 3.06204900  | 2.17970600  | C | 4.52700500  | -0.71998800 | 1.54536100  |
| C                                         | -2.81170700 | 5.02828600  | -0.99884900 | C | 5.53597900  | -1.69597000 | 1.48166800  |
| H                                         | -2.46351900 | 3.20860700  | -2.07991300 | C | 4.10003400  | -0.27720900 | 2.80682000  |
| C                                         | -2.81557700 | 5.66598300  | 0.24298200  | C | 6.09542600  | -2.21776800 | 2.64787200  |
| H                                         | -2.44192400 | 5.43132600  | 2.35570000  | H | 5.89392400  | -2.03955800 | 0.51462900  |
| H                                         | -3.08772600 | 5.57932000  | -1.89528700 | C | 4.65609900  | -0.80267000 | 3.97637100  |
| H                                         | -3.09465200 | 6.71355900  | 0.32161800  | H | 3.33025900  | 0.48818700  | 2.87163700  |
| Pd                                        | -1.44267000 | 0.96275700  | 0.02370600  | C | 5.65499200  | -1.77344000 | 3.89822400  |
| P                                         | -3.70296000 | 0.28457000  | 0.02726800  | H | 6.87745200  | -2.97015400 | 2.58263000  |
| C                                         | -5.32147800 | 1.91937700  | 1.37995000  | H | 4.31337200  | -0.44798700 | 4.94494200  |
| H                                         | -5.75097500 | 1.04909200  | 1.88715300  | H | 6.09355900  | -2.17962700 | 4.80597600  |
| H                                         | -4.50766600 | 2.31677800  | 1.99964500  | C | 5.11929800  | 0.10121500  | -1.14057600 |
| C                                         | -3.97873900 | 0.64467800  | -2.64459400 | C | 6.16551700  | 0.99146300  | -0.83448700 |
| H                                         | -4.64331800 | 1.49847500  | -2.47234100 | C | 5.17257500  | -0.58680100 | -2.36248000 |
| H                                         | -2.95710800 | 1.02298600  | -2.78537700 | C | 7.23463800  | 1.17215300  | -1.70917100 |
| O                                         | -4.01949900 | -0.82410200 | 0.98958700  | H | 6.14321000  | 1.54493000  | 0.10152200  |
| O                                         | -4.01183100 | -0.22425300 | -1.50256500 | C | 6.23984500  | -0.39771300 | -3.24576500 |
| O                                         | -4.79854000 | 1.50754000  | 0.10416200  | H | 4.38331500  | -1.27865300 | -2.63908800 |
| C                                         | -6.36547000 | 2.99458400  | 1.13048900  | C | 7.27501500  | 0.47817200  | -2.92195300 |
| H                                         | -5.91396500 | 3.85977800  | 0.63458500  | H | 8.03460400  | 1.85995500  | -1.44746900 |
| H                                         | -6.79922000 | 3.32506600  | 2.08169700  | H | 6.25975800  | -0.94142600 | -4.18693600 |
| H                                         | -7.17159700 | 2.60994900  | 0.49695300  | H | 8.10477200  | 0.62351000  | -3.60841800 |
| C                                         | -4.41892600 | -0.15992300 | -3.85689200 | C | -2.86704600 | -1.77843700 | -2.15683200 |
| H                                         | -4.39334800 | 0.46735800  | -4.75583900 | C | -4.11365000 | -1.13794400 | -2.01612200 |
| H                                         | -5.43980500 | -0.53122100 | -3.72084300 | C | -2.56399700 | -2.43464100 | -3.35985100 |
| H                                         | -3.75743000 | -1.01873800 | -4.00939500 | C | -5.03582300 | -1.17416500 | -3.06183700 |
|                                           |             |             |             | H | -4.34654100 | -0.61162000 | -1.09173900 |
|                                           |             |             |             | C | -3.49188400 | -2.45762600 | -4.40472100 |
| <b>11c</b>                                |             |             |             | H | -1.60938700 | -2.93224200 | -3.49749300 |
| SCF energy: -2964.996686                  |             |             |             | C | -4.72901400 | -1.83036700 | -4.25709300 |
| SCF energy in solution: -2964.1567356900  |             |             |             | H | -5.99636500 | -0.68036300 | -2.94177300 |
| Free energy in solution: -2963.5208876900 |             |             |             | H | -3.24430900 | -2.96907300 | -5.33120500 |
| P                                         | -1.67623600 | -1.63399500 | -0.76040000 | H | -5.44975400 | -1.84994700 | -5.07031400 |
| C                                         | 2.75176700  | -1.48990700 | -0.58070500 | C | -2.42429400 | -2.61227400 | 0.60596300  |
| H                                         | 2.34235100  | -1.20991100 | -1.55929900 | C | -3.27721200 | -3.69413000 | 0.34164000  |
| H                                         | 3.42473300  | -2.34294400 | -0.74105500 | C | -2.06315700 | -2.33225300 | 1.93142300  |
| C                                         | -0.24586800 | -2.74394400 | -1.25285900 | C | -3.75995400 | -4.48196500 | 1.38743000  |

|                                           |             |             |             |   |             |             |             |
|-------------------------------------------|-------------|-------------|-------------|---|-------------|-------------|-------------|
| H                                         | -3.57490200 | -3.91642800 | -0.67875800 | C | -1.36190000 | 3.20977600  | 0.75977400  |
| C                                         | -2.54104100 | -3.12823200 | 2.97392900  | H | -1.11558800 | 3.73512200  | -0.16954400 |
| H                                         | -1.43278800 | -1.47595000 | 2.14874400  | H | -2.20912800 | 3.74152500  | 1.20669200  |
| C                                         | -3.39102800 | -4.20247300 | 2.70468300  | C | 1.62776800  | 3.13230200  | -0.22652800 |
| H                                         | -4.42682700 | -5.31246700 | 1.17158100  | H | 2.54661100  | 3.64667100  | -0.52999300 |
| H                                         | -2.25642100 | -2.90117700 | 3.99795500  | H | 0.89867200  | 3.29316700  | -1.02939900 |
| H                                         | -3.76911700 | -4.81608900 | 3.51803000  | C | -0.14183900 | 3.20770800  | 1.71090700  |
| O                                         | 0.79111800  | 0.71384500  | -3.12953800 | H | 0.05691400  | 2.19781100  | 2.08870700  |
| C                                         | 0.12308600  | 0.65783500  | -2.20302300 | H | -0.37675300 | 3.80584500  | 2.59906800  |
| C                                         | -0.62624000 | 2.78243200  | -0.71228100 | C | 1.14062800  | 3.77551200  | 1.08536800  |
| C                                         | 0.52867200  | 3.24786400  | -0.06897400 | H | 0.98769000  | 4.84440700  | 0.87788900  |
| C                                         | -1.38757100 | 3.68098400  | -1.47263200 | H | 1.94607500  | 3.71927900  | 1.82612900  |
| C                                         | 0.90075900  | 4.59439700  | -0.16388500 | P | -1.90431700 | 1.47618800  | 0.30221500  |
| H                                         | 1.14992300  | 2.56581000  | 0.50643100  | C | -2.69918700 | 0.96840000  | 1.89663200  |
| C                                         | -1.01170400 | 5.02533900  | -1.56987100 | C | -3.92851200 | 1.49728300  | 2.32410400  |
| H                                         | -2.28961600 | 3.34468600  | -1.97739100 | C | -2.02378200 | 0.06781000  | 2.73408900  |
| C                                         | 0.13167800  | 5.48687300  | -0.91296100 | C | -4.46386300 | 1.13899600  | 3.56112800  |
| H                                         | 1.79700800  | 4.94042600  | 0.34630200  | H | -4.47408600 | 2.18487300  | 1.68351600  |
| H                                         | -1.61736400 | 5.71112800  | -2.15823700 | C | -2.55820500 | -0.28557800 | 3.97627100  |
| H                                         | 0.42224800  | 6.53172000  | -0.98811900 | H | -1.08733300 | -0.37670800 | 2.40705200  |
| Pd                                        | -1.10347100 | 0.76349800  | -0.65393200 | C | -3.77787200 | 0.24863100  | 4.39196900  |
| P                                         | -2.71622900 | 1.23157400  | 0.99209900  | H | -5.41785100 | 1.55390300  | 3.87639300  |
| C                                         | -2.78731900 | 0.78655500  | 3.62082400  | H | -2.02433200 | -0.98816900 | 4.61082900  |
| H                                         | -3.42319700 | 1.67122200  | 3.74743300  | H | -4.19714300 | -0.03104300 | 5.35490400  |
| H                                         | -3.44274700 | -0.07901600 | 3.47907900  | C | -3.35257400 | 1.78730500  | -0.80459200 |
| C                                         | -2.51639100 | 3.83376700  | 1.84437000  | C | -4.19841000 | 0.71056400  | -1.13095000 |
| H                                         | -1.86619500 | 3.40322100  | 2.61348300  | C | -3.60638200 | 3.03528000  | -1.39840400 |
| H                                         | -1.88891400 | 4.36530300  | 1.12469000  | C | -5.26405600 | 0.88228500  | -2.01309100 |
| O                                         | -3.95436000 | 0.39574900  | 0.80743500  | H | -4.02113500 | -0.26791500 | -0.69702200 |
| O                                         | -3.22648900 | 2.78608200  | 1.16077100  | C | -4.67194700 | 3.20294200  | -2.28695600 |
| O                                         | -1.96171700 | 0.94810800  | 2.44554800  | H | -2.98375900 | 3.89385200  | -1.17050300 |
| C                                         | -1.87223400 | 0.60542100  | 4.82035100  | C | -5.50467000 | 2.12831800  | -2.59695700 |
| H                                         | -1.23533300 | -0.27757800 | 4.69638900  | H | -5.90279300 | 0.03531800  | -2.24869900 |
| H                                         | -2.46627400 | 0.47678000  | 5.73284900  | H | -4.85004300 | 4.17886400  | -2.73137300 |
| H                                         | -1.22172300 | 1.47679700  | 4.95122300  | H | -6.33323100 | 2.25924500  | -3.28784500 |
| C                                         | -3.54263100 | 4.77426300  | 2.45934100  | C | 3.26577500  | 1.15972800  | -1.54835900 |
| H                                         | -3.03618200 | 5.60708800  | 2.96204900  | C | 4.17295500  | 0.08516800  | -1.55948800 |
| H                                         | -4.16796100 | 4.25295700  | 3.19222800  | C | 3.29235000  | 2.07985900  | -2.61027800 |
| H                                         | -4.19803100 | 5.18548100  | 1.68463600  | C | 5.09483100  | -0.04281200 | -2.59896900 |
|                                           |             |             |             | H | 4.12476900  | -0.65941400 | -0.77179800 |
|                                           |             |             |             | C | 4.21395800  | 1.94069200  | -3.65050300 |
| <b>TS8c</b>                               |             |             |             | H | 2.59707400  | 2.91247700  | -2.64365900 |
| SCF energy: -2964.984214                  |             |             |             | C | 5.12193700  | 0.88190700  | -3.64505500 |
| SCF energy in solution: -2964.15713167    |             |             |             | H | 5.79036000  | -0.87788700 | -2.59144500 |
| Free energy in solution: -2963.5150186700 |             |             |             | H | 4.21866500  | 2.66326100  | -4.46245000 |
| P                                         | 2.01219200  | 1.28983100  | -0.19251700 | H | 5.84051400  | 0.77472800  | -4.45344900 |

|    |             |             |             |                                           |             |             |             |
|----|-------------|-------------|-------------|-------------------------------------------|-------------|-------------|-------------|
| C  | 2.99872200  | 1.17821600  | 1.36081300  | SCF energy: -2851.682240                  |             |             |             |
| C  | 4.24940700  | 1.80662600  | 1.45955400  | SCF energy in solution: -2850.8764302200  |             |             |             |
| C  | 2.46927100  | 0.53832700  | 2.48868700  | Free energy in solution: -2850.2386532200 |             |             |             |
| C  | 4.95198400  | 1.79992600  | 2.66567700  | P                                         | -1.86095300 | -1.12434000 | -0.74544900 |
| H  | 4.68511800  | 2.29125200  | 0.59027600  | C                                         | 1.50983500  | -3.05514800 | -1.19778000 |
| C  | 3.16871600  | 0.53897700  | 3.69636800  | H                                         | 1.33610600  | -2.97578900 | -2.27611500 |
| H  | 1.52097400  | 0.01689400  | 2.41457000  | H                                         | 2.42371300  | -3.64579300 | -1.07573900 |
| C  | 4.41103500  | 1.16901700  | 3.78771800  | C                                         | -1.45360600 | -2.48719500 | -1.97400700 |
| H  | 5.92280600  | 2.28478700  | 2.72604400  | H                                         | -2.35294900 | -2.68360600 | -2.56865200 |
| H  | 2.74776300  | 0.03513600  | 4.56249000  | H                                         | -0.71006000 | -2.07263100 | -2.66504500 |
| H  | 4.95860000  | 1.16267400  | 4.72648500  | C                                         | 0.30806100  | -3.73779900 | -0.50695600 |
| O  | 0.09272200  | 0.72163900  | -3.74904900 | H                                         | 0.06476300  | -3.23276300 | 0.43615900  |
| C  | -0.04003100 | 0.64366400  | -2.61360600 | H                                         | 0.58941200  | -4.75952800 | -0.22605500 |
| C  | -1.40881600 | -1.61568800 | -1.12611000 | C                                         | -0.95021700 | -3.81532300 | -1.38465100 |
| C  | -2.22823100 | -2.14948400 | -0.11831100 | H                                         | -0.75048500 | -4.49182800 | -2.22815700 |
| C  | -1.67452800 | -2.00496200 | -2.45014000 | H                                         | -1.75615200 | -4.27776800 | -0.80401800 |
| C  | -3.29473000 | -3.00424600 | -0.42333000 | P                                         | 1.86713700  | -1.34128400 | -0.52412500 |
| H  | -2.03616400 | -1.91495700 | 0.92144000  | C                                         | 2.63987200  | -1.80160500 | 1.08931800  |
| C  | -2.74235900 | -2.85627700 | -2.75846500 | C                                         | 3.81989700  | -2.56183000 | 1.15287800  |
| H  | -1.04579500 | -1.66130800 | -3.26520800 | C                                         | 1.99722600  | -1.44907100 | 2.28477900  |
| C  | -3.56317800 | -3.35695700 | -1.74690800 | C                                         | 4.34350700  | -2.95625600 | 2.38348300  |
| H  | -3.91111700 | -3.39648700 | 0.38314400  | H                                         | 4.34074300  | -2.83590100 | 0.23924500  |
| H  | -2.92342100 | -3.13010200 | -3.79569500 | C                                         | 2.51795800  | -1.85163600 | 3.51739500  |
| H  | -4.39050600 | -4.02073900 | -1.98518800 | H                                         | 1.09273700  | -0.84719800 | 2.24421500  |
| Pd | 0.07715600  | -0.22256100 | -0.68722500 | C                                         | 3.69151500  | -2.60371100 | 3.56868800  |
| P  | 1.26323900  | -2.05323700 | 0.11462200  | H                                         | 5.26019200  | -3.53908700 | 2.41777000  |
| C  | 1.25887300  | -3.32065900 | 2.46046500  | H                                         | 2.00802100  | -1.56985900 | 4.43462800  |
| H  | 1.48860600  | -4.29031500 | 2.00045400  | H                                         | 4.10026300  | -2.91296500 | 4.52698600  |
| H  | 2.20934100  | -2.82495400 | 2.68206000  | C                                         | 3.27690800  | -0.80212000 | -1.58438300 |
| C  | 0.23370800  | -4.46719300 | -0.75487000 | C                                         | 4.38483600  | -0.13419900 | -1.03992800 |
| H  | -0.28041000 | -4.46067600 | 0.21119600  | C                                         | 3.21519800  | -0.97489000 | -2.97719900 |
| H  | -0.50984500 | -4.27684000 | -1.53391200 | C                                         | 5.41329600  | 0.32316300  | -1.86431800 |
| O  | 2.72061600  | -1.76901900 | 0.36772100  | H                                         | 4.43938700  | 0.04497000  | 0.02831700  |
| O  | 1.22346300  | -3.42712100 | -0.79218700 | C                                         | 4.24497000  | -0.51712600 | -3.80005200 |
| O  | 0.50869900  | -2.51155600 | 1.52940800  | H                                         | 2.36033400  | -1.46452800 | -3.43515100 |
| C  | 0.41797000  | -3.50682100 | 3.71248500  | C                                         | 5.35056400  | 0.12919500  | -3.24494300 |
| H  | 0.20230300  | -2.54038100 | 4.18230100  | H                                         | 6.26068700  | 0.84065900  | -1.42318400 |
| H  | 0.95328700  | -4.12944500 | 4.43900500  | H                                         | 4.18088500  | -0.66668200 | -4.87465200 |
| H  | -0.53465700 | -3.99295000 | 3.47615600  | H                                         | 6.15295200  | 0.48587200  | -3.88509200 |
| C  | 0.93498200  | -5.79694000 | -0.99448000 | C                                         | -3.02963300 | -0.10814100 | -1.75667600 |
| H  | 0.20085300  | -6.61182400 | -1.00928900 | C                                         | -4.08880900 | 0.57961000  | -1.14250300 |
| H  | 1.66948700  | -6.00297800 | -0.20847100 | C                                         | -2.83670200 | 0.03763700  | -3.14081500 |
| H  | 1.45994500  | -5.78705400 | -1.95537900 | C                                         | -4.94736800 | 1.37073500  | -1.90646800 |
|    |             |             |             | H                                         | -4.20963700 | 0.52564900  | -0.06628300 |
|    |             |             |             | C                                         | -3.69500600 | 0.83648400  | -3.89840900 |
|    |             |             |             | H                                         | -2.01753100 | -0.46921100 | -3.64227900 |

|    |             |             |             |                          |                  |             |             |
|----|-------------|-------------|-------------|--------------------------|------------------|-------------|-------------|
| C  | -4.75715600 | 1.50077200  | -3.28343900 |                          |                  |             |             |
| H  | -5.76226900 | 1.89676700  | -1.41643700 | <b>TS9c</b>              |                  |             |             |
| H  | -3.53255500 | 0.93515900  | -4.96870900 | SCF energy:              | -2851.659052     |             |             |
| H  | -5.42753600 | 2.12094000  | -3.87286200 | SCF energy in solution:  | -2850.8565232500 |             |             |
| C  | -2.93722700 | -2.02476500 | 0.44691800  | Free energy in solution: | -2850.2207432500 |             |             |
| C  | -4.08249700 | -2.71002300 | 0.00941900  | P                        | 1.64370900       | -1.58536400 | 0.24485500  |
| C  | -2.58347500 | -2.08702000 | 1.80087000  | C                        | -1.94501600      | -3.11143600 | -0.37204500 |
| C  | -4.85113400 | -3.45048600 | 0.90761300  | H                        | -1.80981700      | -3.58689300 | 0.60717100  |
| H  | -4.38482200 | -2.65688600 | -1.03328900 | H                        | -2.87650900      | -3.50853500 | -0.79009000 |
| C  | -3.35102800 | -2.83228900 | 2.69814300  | C                        | 1.05308200       | -3.33527300 | 0.59552900  |
| H  | -1.72989400 | -1.52116600 | 2.15597400  | H                        | 1.88833300       | -3.91824200 | 1.00156600  |
| C  | -4.48325000 | -3.51604400 | 2.25394100  | H                        | 0.32232000       | -3.24029900 | 1.40773700  |
| H  | -5.73768800 | -3.97255500 | 0.55716400  | C                        | -0.75371900      | -3.43891000 | -1.30413400 |
| H  | -3.07035100 | -2.86489700 | 3.74745200  | H                        | -0.41497400      | -2.53594700 | -1.82660000 |
| H  | -5.08300500 | -4.09142000 | 2.95436700  | H                        | -1.09217600      | -4.12456900 | -2.09015500 |
| C  | 1.55315300  | 1.66147400  | 0.10851500  | C                        | 0.44242100       | -4.09733000 | -0.59448400 |
| C  | 2.26810800  | 1.99361300  | 1.26844900  | H                        | 0.13156600       | -5.08559400 | -0.22554800 |
| C  | 1.89874200  | 2.32278300  | -1.08329600 | H                        | 1.22727000       | -4.28229000 | -1.33793200 |
| C  | 3.29297600  | 2.94691800  | 1.23852800  | P                        | -2.15730200      | -1.26956800 | -0.07318800 |
| H  | 2.01342600  | 1.52826800  | 2.21491000  | C                        | -3.06710900      | -0.79247100 | -1.61759900 |
| C  | 2.91324400  | 3.28546300  | -1.11525800 | C                        | -4.43544800      | -1.04566200 | -1.80239600 |
| H  | 1.37430200  | 2.08760700  | -2.00788700 | C                        | -2.34335600      | -0.18722200 | -2.65866700 |
| C  | 3.61796900  | 3.60030000  | 0.04806700  | C                        | -5.06378100      | -0.70951200 | -3.00224900 |
| H  | 3.83024400  | 3.18503900  | 2.15467400  | H                        | -5.01696300      | -1.49730500 | -1.00342300 |
| H  | 3.15300700  | 3.78395800  | -2.05231500 | C                        | -2.97286800      | 0.13927000  | -3.86290300 |
| H  | 4.40876300  | 4.34646900  | 0.02765100  | H                        | -1.28946900      | 0.04810900  | -2.52324100 |
| Pd | 0.06162900  | 0.23317000  | -0.04798000 | C                        | -4.33306200      | -0.11997300 | -4.03702200 |
| P  | -1.39533400 | 1.67589200  | 1.06940000  | H                        | -6.12553100      | -0.90663500 | -3.12793900 |
| C  | -1.31126900 | 2.99261400  | 3.37821000  | H                        | -2.39740500      | 0.60658900  | -4.65765500 |
| H  | -1.81509700 | 3.88298200  | 2.97949100  | H                        | -4.82432000      | 0.14171300  | -4.97066800 |
| H  | -2.08330900 | 2.30299200  | 3.73487100  | C                        | -3.46186600      | -1.23030000 | 1.23823700  |
| C  | -1.05135600 | 4.06706000  | -0.18601800 | C                        | -3.63771500      | -0.03006700 | 1.94803100  |
| H  | -0.36689300 | 4.32354600  | 0.63079600  | C                        | -4.26155700      | -2.33365600 | 1.58221400  |
| H  | -0.44540900 | 3.74628300  | -1.03995600 | C                        | -4.59395500      | 0.06762500  | 2.95920000  |
| O  | -2.63777400 | 0.99046300  | 1.58174300  | H                        | -3.01931000      | 0.82928300  | 1.71249200  |
| O  | -1.91650900 | 2.99607800  | 0.21967800  | C                        | -5.21251200      | -2.23699600 | 2.60096700  |
| O  | -0.55794300 | 2.36072000  | 2.32446400  | H                        | -4.15201800      | -3.27754600 | 1.05760400  |
| C  | -0.34401500 | 3.37257000  | 4.48709800  | C                        | -5.38331100      | -1.03558700 | 3.29039900  |
| H  | 0.14671700  | 2.48180000  | 4.89448000  | H                        | -4.71369200      | 1.00673900  | 3.49291900  |
| H  | -0.87917900 | 3.87508600  | 5.30171900  | H                        | -5.82022000      | -3.10242700 | 2.85307900  |
| H  | 0.43144600  | 4.04877500  | 4.11186000  | H                        | -6.12327500      | -0.96158400 | 4.08304300  |
| C  | -1.92427200 | 5.25441500  | -0.56331500 | C                        | 2.65265200       | -1.29174100 | 1.76919700  |
| H  | -1.30062700 | 6.09128700  | -0.89995100 | C                        | 4.02938600       | -1.02970400 | 1.74698100  |
| H  | -2.52070900 | 5.58689500  | 0.29304500  | C                        | 1.98652300       | -1.26816600 | 3.00722200  |
| H  | -2.61071500 | 4.98434700  | -1.37275400 | C                        | 4.72367900       | -0.76534300 | 2.93078700  |
|    |             |             |             | H                        | 4.56511800       | -1.02757600 | 0.80366700  |

|    |             |             |             |                                         |             |             |             |
|----|-------------|-------------|-------------|-----------------------------------------|-------------|-------------|-------------|
| C  | 2.68120100  | -1.01233900 | 4.18901300  | H                                       | 3.20393900  | 3.96117800  | 1.38220400  |
| H  | 0.91242900  | -1.43332200 | 3.04828300  |                                         |             |             |             |
| C  | 4.05495600  | -0.75955100 | 4.15517100  |                                         |             |             |             |
| H  | 5.79148500  | -0.56468200 | 2.89194200  | <b>2d</b>                               |             |             |             |
| H  | 2.14716000  | -1.00368000 | 5.13584400  | SCF energy: -2638.858576                |             |             |             |
| H  | 4.59679100  | -0.55563300 | 5.07488200  | SCF energy in solution: -2638.01716823  |             |             |             |
| C  | 2.87719500  | -1.87015500 | -1.09997000 | Free energy in solution: -2637.40445923 |             |             |             |
| C  | 3.83565100  | -2.89740300 | -1.02647700 | P                                       | -2.41585900 | -0.36652000 | -0.31018400 |
| C  | 2.82638600  | -1.06973900 | -2.25175100 | C                                       | 0.04337600  | 1.40218700  | -2.88755300 |
| C  | 4.72538100  | -3.11677600 | -2.07765600 | H                                       | -0.30314700 | 2.33907700  | -3.34125500 |
| H  | 3.89609100  | -3.52541000 | -0.14140700 | H                                       | 1.01112900  | 1.15973100  | -3.33739700 |
| C  | 3.72065500  | -1.29358500 | -3.30363700 | C                                       | -2.99448000 | 0.76983200  | -1.66947700 |
| H  | 2.09891400  | -0.26509700 | -2.32491000 | H                                       | -4.08950400 | 0.76500700  | -1.73668500 |
| C  | 4.66818300  | -2.31362200 | -3.22059800 | H                                       | -2.70315400 | 1.77760300  | -1.35481400 |
| H  | 5.46148300  | -3.91350000 | -2.00564300 | C                                       | -0.91220500 | 0.24053600  | -3.23176700 |
| H  | 3.67109200  | -0.66369300 | -4.18790800 | H                                       | -0.59756700 | -0.64660100 | -2.66996900 |
| H  | 5.36075200  | -2.48538800 | -4.04071900 | H                                       | -0.74876300 | -0.00104200 | -4.29134400 |
| C  | -0.76844400 | 2.09450400  | 0.38241300  | C                                       | -2.42773500 | 0.45914500  | -3.07109900 |
| C  | -1.86666100 | 2.59680300  | -0.34441200 | H                                       | -2.74105400 | 1.27799200  | -3.73467600 |
| C  | -0.64021500 | 2.45587500  | 1.74091900  | H                                       | -2.92405800 | -0.44340000 | -3.44987900 |
| C  | -2.82893500 | 3.39369000  | 0.28030800  | P                                       | 0.43160800  | 1.64028000  | -1.06677100 |
| H  | -1.97462700 | 2.34841600  | -1.39594200 | C                                       | 2.10805700  | 2.42645400  | -1.08684400 |
| C  | -1.60956900 | 3.24379900  | 2.36343100  | C                                       | 2.79754100  | 2.49905600  | 0.13312700  |
| H  | 0.22829800  | 2.12475100  | 2.30382000  | C                                       | 2.69906900  | 2.99125300  | -2.22688300 |
| C  | -2.70656800 | 3.71550600  | 1.63542100  | C                                       | 4.04174800  | 3.12488000  | 0.21313500  |
| H  | -3.67908300 | 3.75840600  | -0.29133100 | H                                       | 2.36697500  | 2.04969300  | 1.02283700  |
| H  | -1.50177600 | 3.50132500  | 3.41448700  | C                                       | 3.94743800  | 3.61246800  | -2.14770700 |
| H  | -3.45397000 | 4.34065200  | 2.11726200  | H                                       | 2.19417600  | 2.95606200  | -3.18726100 |
| Pd | -0.09007000 | 0.05274100  | 0.06847300  | C                                       | 4.62148600  | 3.68333400  | -0.92766000 |
| P  | 1.06533600  | 1.99951300  | -0.69196800 | H                                       | 4.55970800  | 3.16257300  | 1.16757400  |
| C  | 0.62884700  | 4.54738100  | -1.47417500 | H                                       | 4.39059400  | 4.04309800  | -3.04227100 |
| H  | 0.79844300  | 4.17685000  | -2.49045700 | H                                       | 5.59284500  | 4.16739000  | -0.86769900 |
| H  | -0.45401200 | 4.58272700  | -1.29771600 | C                                       | -0.57148300 | 3.11600400  | -0.54311100 |
| C  | 3.68331900  | 2.42101700  | -0.05164400 | C                                       | -0.68323100 | 4.27510800  | -1.32858200 |
| H  | 4.46233300  | 1.67553200  | -0.24341900 | C                                       | -1.19435000 | 3.09507300  | 0.71349200  |
| H  | 3.60741100  | 3.07448900  | -0.92411100 | C                                       | -1.41515900 | 5.37349700  | -0.87818000 |
| O  | 0.97295200  | 1.68946000  | -2.16788100 | H                                       | -0.18227000 | 4.33276600  | -2.29134200 |
| O  | 2.46031100  | 1.65991700  | 0.11169900  | C                                       | -1.92343000 | 4.19712100  | 1.16919400  |
| O  | 1.23435300  | 3.65138700  | -0.53294900 | H                                       | -1.11028500 | 2.20526100  | 1.33163800  |
| C  | 1.24292500  | 5.92503800  | -1.27564500 | C                                       | -2.03899200 | 5.33618500  | 0.37235200  |
| H  | 1.07522100  | 6.28112300  | -0.25365600 | H                                       | -1.49281100 | 6.26202200  | -1.49964600 |
| H  | 0.79084600  | 6.64265900  | -1.97052300 | H                                       | -2.40259600 | 4.15846000  | 2.14370200  |
| H  | 2.32256800  | 5.90096700  | -1.45892400 | H                                       | -2.60742000 | 6.19365800  | 0.72303500  |
| C  | 3.98453800  | 3.21525300  | 1.20833000  | C                                       | -3.47811100 | 0.07825000  | 1.13421600  |
| H  | 4.94769600  | 3.73190900  | 1.10919200  | C                                       | -3.21905600 | -0.59653000 | 2.34111600  |
| H  | 4.03772300  | 2.54891600  | 2.07590700  | C                                       | -4.48227600 | 1.05680200  | 1.11114600  |

|   |             |             |             |                                         |             |             |             |
|---|-------------|-------------|-------------|-----------------------------------------|-------------|-------------|-------------|
| C | -3.96134200 | -0.31442000 | 3.48646600  | Pd                                      | -0.05418800 | -0.32846600 | 0.09902800  |
| H | -2.42526500 | -1.33908100 | 2.38039300  |                                         |             |             |             |
| C | -5.21770800 | 1.34595400  | 2.26439000  |                                         |             |             |             |
| H | -4.69779200 | 1.60634800  | 0.20044900  | <b>TS1d</b>                             |             |             |             |
| C | -4.96330000 | 0.65981500  | 3.45182300  | SCF energy: -2638.832927                |             |             |             |
| H | -3.75152200 | -0.84949700 | 4.40887500  | SCF energy in solution: -2637.99202351  |             |             |             |
| H | -5.99184100 | 2.10842600  | 2.22985800  | Free energy in solution: -2637.38025951 |             |             |             |
| H | -5.53749700 | 0.88501200  | 4.34662200  | P                                       | -2.44820500 | -1.07697600 | 0.30977100  |
| C | -3.08339300 | -2.01827800 | -0.81008100 | C                                       | 0.51255000  | -3.00155900 | 1.39396300  |
| C | -4.38738900 | -2.17803900 | -1.30722900 | H                                       | 0.03865800  | -3.62199500 | 0.62651900  |
| C | -2.26486200 | -3.14936900 | -0.66978900 | H                                       | 1.31215300  | -3.61007000 | 1.82817900  |
| C | -4.85894000 | -3.43935800 | -1.66923600 | C                                       | -2.54775600 | -2.86234200 | 0.87142500  |
| H | -5.04499600 | -1.31793500 | -1.40428900 | H                                       | -3.59291500 | -3.19235200 | 0.88332900  |
| C | -2.74301400 | -4.41363800 | -1.02712500 | H                                       | -2.04136200 | -3.44909700 | 0.09528500  |
| H | -1.26177200 | -3.03789700 | -0.26572600 | C                                       | -0.51003500 | -2.58527900 | 2.47779600  |
| C | -4.03546100 | -4.56052300 | -1.53092900 | H                                       | -0.56867700 | -1.49225000 | 2.53610000  |
| H | -5.86955500 | -3.54865100 | -2.05441600 | H                                       | -0.16082700 | -2.92204100 | 3.46119000  |
| H | -2.10218900 | -5.28326300 | -0.90667500 | C                                       | -1.93056200 | -3.13819900 | 2.25554300  |
| H | -4.40472500 | -5.54390300 | -1.81030900 | H                                       | -1.92762000 | -4.22640500 | 2.40883900  |
| O | 0.39914600  | -2.05281400 | 1.18259800  | H                                       | -2.58722900 | -2.72053500 | 3.02896000  |
| C | 1.55639200  | -1.52827600 | 0.93746800  | P                                       | 1.31522700  | -1.58162700 | 0.44922700  |
| C | 2.32854700  | -0.82544700 | 2.00206700  | C                                       | 2.79953000  | -1.26240600 | 1.51011300  |
| C | 3.65991800  | -0.41969700 | 1.81975500  | C                                       | 4.11326900  | -1.34536900 | 1.02941900  |
| C | 1.70693100  | -0.55684400 | 3.23518200  | C                                       | 2.59890800  | -0.91196200 | 2.85699300  |
| C | 4.34854300  | 0.24049700  | 2.83845900  | C                                       | 5.19692100  | -1.10907000 | 1.87874100  |
| H | 4.15833100  | -0.61252500 | 0.87513400  | H                                       | 4.29752600  | -1.58697600 | -0.01125800 |
| C | 2.39515600  | 0.10707300  | 4.24673300  | C                                       | 3.68129000  | -0.68451400 | 3.70531800  |
| H | 0.68580900  | -0.89055900 | 3.38566600  | H                                       | 1.59042900  | -0.80822100 | 3.24784700  |
| C | 3.72049300  | 0.51222000  | 4.05516400  | C                                       | 4.98703800  | -0.78649500 | 3.21883800  |
| H | 5.38103700  | 0.54158100  | 2.67816700  | H                                       | 6.20766700  | -1.17510100 | 1.48490900  |
| H | 1.90009900  | 0.29930300  | 5.19552500  | H                                       | 3.50419400  | -0.42305400 | 4.74555700  |
| H | 4.25799400  | 1.02523800  | 4.84829900  | H                                       | 5.83205400  | -0.60672200 | 3.87819200  |
| C | 3.52054700  | -4.53622200 | -0.43846900 | C                                       | 1.98698400  | -2.49927400 | -1.00618100 |
| C | 3.43370500  | -2.83573800 | -2.23461900 | C                                       | 2.72762400  | -3.68587400 | -0.85409400 |
| C | 4.34332900  | -3.81920100 | -1.50385300 | C                                       | 1.69712500  | -2.04102600 | -2.30015800 |
| H | 4.11858900  | -5.19984600 | 0.19111700  | C                                       | 3.16548000  | -4.39720800 | -1.97030200 |
| H | 2.66203200  | -3.38676700 | -2.79313300 | H                                       | 2.97413100  | -4.05274700 | 0.13846200  |
| H | 5.17840300  | -3.28185500 | -1.03577200 | C                                       | 2.13947200  | -2.75705400 | -3.41702600 |
| N | 2.39428900  | -2.32073900 | -0.01741900 | H                                       | 1.14243600  | -1.11724700 | -2.43344500 |
| C | 2.70618400  | -1.86973800 | -1.30633100 | C                                       | 2.87016000  | -3.93368700 | -3.25581300 |
| C | 2.80213000  | -3.58081600 | 0.50248200  | H                                       | 3.73747300  | -5.31192600 | -1.83725900 |
| O | 2.40452300  | -0.75544800 | -1.70306400 | H                                       | 1.91069500  | -2.38748500 | -4.41302800 |
| O | 2.56873700  | -3.88367100 | 1.65357200  | H                                       | 3.21197800  | -4.48870800 | -4.12565800 |
| H | 3.97137200  | -2.21956800 | -2.95972800 | C                                       | -3.28835200 | -1.14523200 | -1.33708600 |
| H | 4.78009500  | -4.53709300 | -2.20671100 | C                                       | -2.88232000 | -0.22114300 | -2.31524100 |
| H | 2.74970000  | -5.15685400 | -0.91921800 | C                                       | -4.28412800 | -2.07920900 | -1.67169800 |

|   |             |             |             |                                           |             |             |             |
|---|-------------|-------------|-------------|-------------------------------------------|-------------|-------------|-------------|
| C | -3.46911500 | -0.21890700 | -3.58198400 | Pd                                        | -0.21302500 | 0.15199100  | 0.03617800  |
| H | -2.08875500 | 0.48582700  | -2.09114500 |                                           |             |             |             |
| C | -4.86793300 | -2.07813000 | -2.93988800 |                                           |             |             |             |
| H | -4.60960900 | -2.82081100 | -0.94857800 | <b>3d</b>                                 |             |             |             |
| C | -4.46455700 | -1.14503600 | -3.89687100 | SCF energy: -2638.856103                  |             |             |             |
| H | -3.13626800 | 0.50116300  | -4.32459200 | SCF energy in solution: -2638.0118791700  |             |             |             |
| H | -5.63531200 | -2.80972500 | -3.17969200 | Free energy in solution: -2637.3999231700 |             |             |             |
| H | -4.91747300 | -1.14684800 | -4.88483700 | P                                         | -1.94344000 | -0.82727700 | 0.23260400  |
| C | -3.67349700 | -0.27822900 | 1.44641900  | C                                         | 0.96154800  | -2.75019300 | 1.96220100  |
| C | -5.06291200 | -0.39068000 | 1.28314400  | H                                         | 0.66546100  | -3.74603600 | 1.61413100  |
| C | -3.18098100 | 0.44235600  | 2.54600800  | H                                         | 1.87081900  | -2.89025900 | 2.55313900  |
| C | -5.93664700 | 0.18998400  | 2.20380000  | C                                         | -2.01090600 | -2.51258600 | 1.04283600  |
| H | -5.46887800 | -0.92065500 | 0.42668000  | H                                         | -3.03629700 | -2.89211500 | 0.97312000  |
| C | -4.05510400 | 1.01419100  | 3.47250300  | H                                         | -1.38689000 | -3.17282900 | 0.42765100  |
| H | -2.10955400 | 0.57687500  | 2.66095200  | C                                         | -0.14349300 | -2.12849600 | 2.84415500  |
| C | -5.43494400 | 0.88889200  | 3.30397500  | H                                         | -0.07329300 | -1.03519300 | 2.79372400  |
| H | -7.01013600 | 0.09762600  | 2.05956500  | H                                         | 0.05479800  | -2.39966400 | 3.88915900  |
| H | -3.65652300 | 1.56910100  | 4.31798400  | C                                         | -1.57815000 | -2.57723900 | 2.51629300  |
| H | -6.11630600 | 1.34038200  | 4.02040500  | H                                         | -1.70032600 | -3.62038400 | 2.84103100  |
| O | 0.80386600  | 1.09009800  | -2.22701900 | H                                         | -2.27480900 | -1.98657700 | 3.12430700  |
| C | 1.09726800  | 1.38701600  | -1.06960200 | P                                         | 1.47224000  | -1.72316400 | 0.46388600  |
| C | 2.49695900  | 1.66616400  | -0.60247700 | C                                         | 3.31426100  | -1.69063200 | 0.61851200  |
| C | 2.77230100  | 2.14727900  | 0.68216800  | C                                         | 4.14556800  | -1.95364000 | -0.47993200 |
| C | 3.55177800  | 1.43042200  | -1.49297500 | C                                         | 3.90394100  | -1.32438300 | 1.84017900  |
| C | 4.08380400  | 2.41954500  | 1.06273600  | C                                         | 5.53342800  | -1.87275500 | -0.35237900 |
| H | 1.94942900  | 2.32038200  | 1.36979100  | H                                         | 3.71333800  | -2.22052500 | -1.43821800 |
| C | 4.86593800  | 1.69478100  | -1.10669400 | C                                         | 5.29072200  | -1.24925300 | 1.96613500  |
| H | 3.32287400  | 1.07450600  | -2.49188400 | H                                         | 3.28459800  | -1.07931700 | 2.69883300  |
| C | 5.13525200  | 2.19581600  | 0.16827100  | C                                         | 6.11010400  | -1.52613000 | 0.86985900  |
| H | 4.28917400  | 2.80092300  | 2.05956100  | H                                         | 6.16253400  | -2.08156500 | -1.21339600 |
| H | 5.67857800  | 1.52504100  | -1.80891700 | H                                         | 5.72848900  | -0.96571100 | 2.91931000  |
| H | 6.15839900  | 2.41134100  | 0.46585100  | H                                         | 7.19065000  | -1.46528300 | 0.96687700  |
| C | -0.12719400 | 5.50758900  | -1.24636800 | C                                         | 1.20068100  | -2.78860500 | -1.01190400 |
| C | -1.84772000 | 4.26539900  | 0.04753500  | C                                         | 1.45800400  | -4.17068800 | -0.99960100 |
| C | -1.03013400 | 5.55555900  | -0.01479200 | C                                         | 0.76621000  | -2.18617700 | -2.20230200 |
| H | 0.56294500  | 6.35390200  | -1.30041700 | C                                         | 1.26466200  | -4.93415200 | -2.15023100 |
| H | -2.58683400 | 4.24257800  | -0.76666800 | H                                         | 1.82382100  | -4.65468800 | -0.09798500 |
| H | -0.41757300 | 5.64981700  | 0.89164900  | C                                         | 0.57846100  | -2.95300300 | -3.35505300 |
| N | 0.22998400  | 3.08705800  | -0.67767500 | H                                         | 0.57240400  | -1.11793800 | -2.22624100 |
| C | -0.97557300 | 3.02949800  | -0.10803000 | C                                         | 0.82222500  | -4.32599700 | -3.32899400 |
| C | 0.72306800  | 4.23460100  | -1.30971700 | H                                         | 1.46333000  | -6.00239900 | -2.12816500 |
| O | -1.44300100 | 1.93814900  | 0.31432300  | H                                         | 0.22954900  | -2.47234600 | -4.26408800 |
| O | 1.78080700  | 4.22518100  | -1.91289100 | H                                         | 0.67027300  | -4.92356800 | -4.22383000 |
| H | -2.40877100 | 4.15979800  | 0.98075700  | C                                         | -2.60092400 | -1.18197700 | -1.45536600 |
| H | -1.69089900 | 6.42925500  | -0.04526400 | C                                         | -2.34155900 | -0.23422700 | -2.45820800 |
| H | -0.73827100 | 5.53583200  | -2.16093600 | C                                         | -3.33331800 | -2.33596100 | -1.78543700 |



|   |             |             |             |                          |                  |             |             |
|---|-------------|-------------|-------------|--------------------------|------------------|-------------|-------------|
| C | -2.81870900 | -0.42415500 | -3.75627000 | Pd                       | 0.31914000       | 0.28811700  | 0.33929600  |
| H | -1.75652100 | 0.65430600  | -2.23522500 |                          |                  |             |             |
| C | -3.80220800 | -2.52624300 | -3.08688200 |                          |                  |             |             |
| H | -3.54187000 | -3.09853100 | -1.04177200 | <b>4d</b>                |                  |             |             |
| C | -3.54960600 | -1.56999500 | -4.07402300 | SCF energy:              | -2638.873415     |             |             |
| H | -2.60213800 | 0.33736900  | -4.49965400 | SCF energy in solution:  | -2638.0321829000 |             |             |
| H | -4.36607800 | -3.42431600 | -3.32709900 | Free energy in solution: | -2637.4188499000 |             |             |
| H | -3.91969600 | -1.72270200 | -5.08492700 | P                        | -2.06513800      | -0.77150100 | 0.14371400  |
| C | -3.31760700 | 0.05190100  | 1.10246100  | C                        | 0.78729300       | -2.52160300 | 2.15206500  |
| C | -4.66623200 | -0.23795000 | 0.83753300  | H                        | 0.60785800       | -3.58504600 | 1.95535600  |
| C | -3.00810200 | 1.00360000  | 2.08670800  | H                        | 1.66228500       | -2.47724000 | 2.80678700  |
| C | -5.68098500 | 0.39965200  | 1.55099500  | C                        | -2.14037800      | -2.44473700 | 0.97689100  |
| H | -4.92616300 | -0.95194200 | 0.06113000  | H                        | -3.14280100      | -2.86845200 | 0.84776400  |
| C | -4.02723700 | 1.63599400  | 2.80409400  | H                        | -1.44529200      | -3.08939600 | 0.42530200  |
| H | -1.97349800 | 1.27703400  | 2.26433300  | C                        | -0.41998500      | -1.89112500 | 2.87870800  |
| C | -5.36346400 | 1.33491400  | 2.53955700  | H                        | -0.39247900      | -0.80110300 | 2.76248600  |
| H | -6.72035300 | 0.16956400  | 1.33136000  | H                        | -0.29850800      | -2.08229000 | 3.95315700  |
| H | -3.77289300 | 2.37422700  | 3.56021100  | C                        | -1.79815500      | -2.44391900 | 2.47637000  |
| H | -6.15557200 | 1.83265600  | 3.09287400  | H                        | -1.87590300      | -3.48405900 | 2.82469200  |
| O | 2.64215100  | 1.33668800  | -0.85009500 | H                        | -2.56807900      | -1.88444900 | 3.02195900  |
| C | 2.09055700  | 1.27743700  | 0.22700300  | P                        | 1.33516900       | -1.67843400 | 0.55514400  |
| C | 2.64507500  | 1.98749900  | 1.43274900  | C                        | 3.17279300       | -1.64265300 | 0.77470600  |
| C | 2.00069800  | 1.95572100  | 2.67547800  | C                        | 4.05200400       | -2.18400000 | -0.17361300 |
| C | 3.85692100  | 2.68420600  | 1.30052100  | C                        | 3.70903700       | -1.01300100 | 1.91089000  |
| C | 2.56079000  | 2.60637200  | 3.77513100  | C                        | 5.43347300       | -2.11193700 | 0.01938800  |
| H | 1.05326100  | 1.43292100  | 2.76430400  | H                        | 3.66410800       | -2.66342800 | -1.06565600 |
| C | 4.41548300  | 3.33382300  | 2.39827000  | C                        | 5.08804600       | -0.94712400 | 2.10394400  |
| H | 4.34231200  | 2.69859100  | 0.32977800  | H                        | 3.05067000       | -0.55566000 | 2.64471500  |
| C | 3.76884400  | 3.29461900  | 3.63816200  | C                        | 5.95536100       | -1.49874000 | 1.15827500  |
| H | 2.05247400  | 2.58407900  | 4.73562600  | H                        | 6.10022600       | -2.53841600 | -0.72535600 |
| H | 5.35483600  | 3.87026800  | 2.29135600  | H                        | 5.48334600       | -0.45463200 | 2.98807800  |
| H | 4.20475100  | 3.80282600  | 4.49464600  | H                        | 7.03050000       | -1.44414500 | 1.30617400  |
| C | -1.45028400 | 4.75040100  | -2.48679500 | C                        | 1.11303700       | -2.89891800 | -0.80856600 |
| C | -1.14160100 | 4.43656600  | -0.03400700 | C                        | 1.21822400       | -4.28800100 | -0.62722500 |
| C | -0.80330500 | 5.33195200  | -1.22999000 | C                        | 0.87847400       | -2.39689900 | -2.09896100 |
| H | -1.10205800 | 5.23650000  | -3.40330300 | C                        | 1.06744500       | -5.15607300 | -1.70918800 |
| H | -2.21920900 | 4.48416300  | 0.18306500  | H                        | 1.43169400       | -4.70182600 | 0.35420400  |
| H | 0.28708700  | 5.36846400  | -1.35544700 | C                        | 0.73704000       | -3.26803300 | -3.18130600 |
| N | -0.82084900 | 2.47913300  | -1.56073100 | H                        | 0.81712000       | -1.32359700 | -2.25278600 |
| C | -0.78125000 | 2.98933900  | -0.34482300 | C                        | 0.82408100       | -4.64715000 | -2.98760500 |
| C | -1.21703500 | 3.24010900  | -2.64667900 | H                        | 1.14540400       | -6.22896700 | -1.55406200 |
| O | -0.43660600 | 2.27715000  | 0.66489400  | H                        | 0.54790100       | -2.86365200 | -4.17140900 |
| O | -1.41473600 | 2.72064500  | -3.74220100 | H                        | 0.70594900       | -5.32502200 | -3.82882200 |
| H | -0.61652700 | 4.73859700  | 0.87654300  | C                        | -2.48823900      | -1.16505500 | -1.60990600 |
| H | -1.13882300 | 6.36077000  | -1.05255700 | C                        | -2.13425800      | -0.22781300 | -2.59659900 |
| H | -2.53997700 | 4.89955600  | -2.45139700 | C                        | -3.13585500      | -2.34904300 | -2.00023800 |

|   |             |             |             |                                       |             |             |             |
|---|-------------|-------------|-------------|---------------------------------------|-------------|-------------|-------------|
| C | -2.43033200 | -0.47388900 | -3.93911200 | Pd                                    | 0.18377500  | 0.33801600  | 0.21408000  |
| H | -1.61965100 | 0.69131700  | -2.32318500 |                                       |             |             |             |
| C | -3.42298900 | -2.59260000 | -3.34471900 |                                       |             |             |             |
| H | -3.42189100 | -3.09243600 | -1.26324900 | <b>TS2d</b>                           |             |             |             |
| C | -3.07177100 | -1.65477700 | -4.31770300 | SCF energy: -2638.807635              |             |             |             |
| H | -2.14934900 | 0.26189900  | -4.68787800 | SCF energy in solution: -2637.963813  |             |             |             |
| H | -3.92221900 | -3.51541900 | -3.62911100 | Free energy in solution: -2637.353171 |             |             |             |
| H | -3.29662700 | -1.84495700 | -5.36415800 | P                                     | -1.58514200 | 0.59453900  | -1.17658700 |
| C | -3.59053300 | 0.04459800  | 0.80015100  | C                                     | 1.77423900  | -0.42758600 | -2.92030400 |
| C | -4.81400700 | 0.01313700  | 0.11155900  | H                                     | 1.66358500  | 0.58162400  | -3.33005300 |
| C | -3.53200600 | 0.68572000  | 2.04965200  | H                                     | 2.69153900  | -0.82656900 | -3.36562000 |
| C | -5.95400500 | 0.59939100  | 0.66446300  | C                                     | -1.09362700 | 0.73754600  | -2.97789700 |
| H | -4.87907000 | -0.46640300 | -0.85972000 | H                                     | -1.91174000 | 1.23678700  | -3.51000600 |
| C | -4.67762800 | 1.26342600  | 2.60207200  | H                                     | -0.27077700 | 1.46197400  | -2.96829600 |
| H | -2.58639800 | 0.76779200  | 2.57612200  | C                                     | 0.54779900  | -1.30243400 | -3.26301500 |
| C | -5.89080200 | 1.22168800  | 1.91259200  | H                                     | 0.25527400  | -1.89000800 | -2.38528900 |
| H | -6.89220400 | 0.56937300  | 0.11625500  | H                                     | 0.81876500  | -2.02783300 | -4.04083200 |
| H | -4.61448700 | 1.75511000  | 3.56940500  | C                                     | -0.67617700 | -0.51589000 | -3.77100700 |
| H | -6.77964600 | 1.67759800  | 2.34100400  | H                                     | -0.46772200 | -0.17484700 | -4.79527900 |
| O | 2.27414900  | 0.94317300  | -1.50072100 | H                                     | -1.51962500 | -1.21175700 | -3.84972200 |
| C | 1.93620600  | 1.19830800  | -0.36133500 | P                                     | 2.06541100  | -0.20683100 | -1.07458300 |
| C | 2.74006800  | 2.13816200  | 0.49137300  | C                                     | 3.30600500  | -1.52366000 | -0.69858000 |
| C | 2.45325300  | 2.33709800  | 1.84705900  | C                                     | 4.09079900  | -1.41553600 | 0.46358000  |
| C | 3.82804300  | 2.80808300  | -0.09409200 | C                                     | 3.43783800  | -2.66821600 | -1.50121500 |
| C | 3.24728900  | 3.19461800  | 2.61113400  | C                                     | 4.99958000  | -2.42141200 | 0.79224400  |
| H | 1.59892300  | 1.83500600  | 2.29093700  | H                                     | 3.96589200  | -0.55871500 | 1.11685200  |
| C | 4.61394700  | 3.66713300  | 0.66865300  | C                                     | 4.34399100  | -3.67566400 | -1.16120300 |
| H | 4.03670600  | 2.63828700  | -1.14567100 | H                                     | 2.83472400  | -2.79139300 | -2.39556100 |
| C | 4.32616800  | 3.85982000  | 2.02469600  | C                                     | 5.13187500  | -3.55225800 | -0.01690700 |
| H | 3.01797100  | 3.34735800  | 3.66262800  | H                                     | 5.60123400  | -2.32202700 | 1.69182200  |
| H | 5.45209600  | 4.18663300  | 0.21096800  | H                                     | 4.43335100  | -4.55380100 | -1.79560100 |
| H | 4.94148200  | 4.52978700  | 2.62037200  | H                                     | 5.83898700  | -4.33444400 | 0.24631000  |
| C | -1.46019300 | 4.48873400  | -0.57765500 | C                                     | 3.07377000  | 1.33765900  | -1.08458500 |
| C | -1.47505500 | 4.14145300  | 1.87952500  | C                                     | 4.38383200  | 1.34575400  | -1.58996900 |
| C | -1.08818200 | 5.11289400  | 0.76557900  | C                                     | 2.50032800  | 2.54426200  | -0.66545000 |
| H | -1.09212500 | 5.06617000  | -1.43055400 | C                                     | 5.09988200  | 2.53982400  | -1.67756500 |
| H | -2.56956000 | 4.03495900  | 1.92442300  | H                                     | 4.85093700  | 0.41723100  | -1.90540400 |
| H | -0.00681500 | 5.30071700  | 0.80096300  | C                                     | 3.21565000  | 3.73958800  | -0.75911500 |
| N | -0.65066200 | 2.31260000  | 0.38220400  | H                                     | 1.49702400  | 2.54723000  | -0.25635500 |
| C | -0.89162700 | 2.74813600  | 1.65835500  | C                                     | 4.51641000  | 3.73988900  | -1.26407100 |
| C | -0.92988300 | 3.06357600  | -0.73902000 | H                                     | 6.11480100  | 2.53177800  | -2.06657000 |
| O | -0.66333300 | 2.02334000  | 2.63764400  | H                                     | 2.75662000  | 4.66758100  | -0.42856700 |
| O | -0.77823500 | 2.59997800  | -1.86978100 | H                                     | 5.07609700  | 4.66916000  | -1.33098400 |
| H | -1.14692800 | 4.47693000  | 2.86746100  | C                                     | -1.84542700 | 2.39152700  | -0.81238900 |
| H | -1.58553300 | 6.08083100  | 0.89900100  | C                                     | -1.12280300 | 3.02359600  | 0.20670400  |
| H | -2.55476300 | 4.43933600  | -0.67883400 | C                                     | -2.76550000 | 3.14375700  | -1.56214800 |

|   |             |             |             |                                           |             |             |             |
|---|-------------|-------------|-------------|-------------------------------------------|-------------|-------------|-------------|
| C | -1.29678700 | 4.38866300  | 0.45334600  | Pd                                        | -0.00327400 | -0.63227000 | 0.21184500  |
| H | -0.44783100 | 2.43725400  | 0.82166000  |                                           |             |             |             |
| C | -2.93800600 | 4.50451800  | -1.31372100 |                                           |             |             |             |
| H | -3.36666900 | 2.66531900  | -2.33080100 | <b>TS3d</b>                               |             |             |             |
| C | -2.19881200 | 5.13195600  | -0.30716700 | SCF energy: -3364.967799                  |             |             |             |
| H | -0.73205000 | 4.86622200  | 1.25001200  | SCF energy in solution: -3363.2692315700  |             |             |             |
| H | -3.65449700 | 5.07323300  | -1.90070500 | Free energy in solution: -3363.2692315700 |             |             |             |
| H | -2.33561900 | 6.19233700  | -0.11177800 | P                                         | 1.81573400  | 1.29817200  | 0.98318800  |
| C | -3.31986300 | -0.02679500 | -1.19394900 | C                                         | -1.71368400 | 2.58999400  | 2.16454100  |
| C | -3.98911200 | -0.43541000 | -2.35683500 | H                                         | -2.05822100 | 3.63087400  | 2.17448800  |
| C | -4.00614000 | -0.04378900 | 0.03331600  | H                                         | -2.50607100 | 1.99903600  | 2.62551000  |
| C | -5.32103500 | -0.85438000 | -2.29705600 | C                                         | 1.54717300  | 3.07826000  | 1.50188200  |
| H | -3.48879700 | -0.42496900 | -3.31946300 | H                                         | 2.51776700  | 3.58451300  | 1.56915300  |
| C | -5.33743500 | -0.45528100 | 0.08374200  | H                                         | 1.03303800  | 3.53150800  | 0.64764700  |
| H | -3.49449300 | 0.26764900  | 0.94069300  | C                                         | -0.46879200 | 2.40555300  | 3.04466500  |
| C | -5.99810200 | -0.86297600 | -1.07781100 | H                                         | -0.18160900 | 1.35063600  | 3.01322600  |
| H | -5.82677800 | -1.16828400 | -3.20664300 | H                                         | -0.80080300 | 2.58729500  | 4.07598800  |
| H | -5.85858800 | -0.45890800 | 1.03731500  | C                                         | 0.74743100  | 3.30752300  | 2.79835500  |
| H | -7.03512200 | -1.18550100 | -1.03277300 | H                                         | 0.43923000  | 4.36308200  | 2.82420700  |
| O | 1.25874900  | -2.75624500 | 1.96189800  | H                                         | 1.42137800  | 3.17215800  | 3.65236300  |
| C | 0.66734700  | -2.04552400 | 1.26747400  | P                                         | -1.70368000 | 1.97216900  | 0.39531400  |
| C | -1.28485100 | -2.35166500 | 0.77131300  | C                                         | -3.52796300 | 1.76858400  | 0.11680300  |
| C | -1.40666900 | -3.40221200 | -0.14921300 | C                                         | -4.18015400 | 2.33679500  | -0.98801800 |
| C | -2.18046400 | -2.25515600 | 1.84282600  | C                                         | -4.28007500 | 0.99603300  | 1.02050400  |
| C | -2.44923600 | -4.32409800 | -0.02640700 | C                                         | -5.55065500 | 2.14889600  | -1.17904800 |
| H | -0.68785300 | -3.51144900 | -0.95658600 | H                                         | -3.62504200 | 2.93300600  | -1.70343100 |
| C | -3.21434500 | -3.18760900 | 1.96477500  | C                                         | -5.65013100 | 0.81873600  | 0.82889400  |
| H | -2.09860300 | -1.43543300 | 2.54761800  | H                                         | -3.79222300 | 0.51424500  | 1.86226300  |
| C | -3.35306500 | -4.21852400 | 1.03298700  | C                                         | -6.29154100 | 1.39429700  | -0.26977100 |
| H | -2.54442500 | -5.13039800 | -0.74971200 | H                                         | -6.03681800 | 2.59954000  | -2.04044700 |
| H | -3.91518600 | -3.10268600 | 2.79175400  | H                                         | -6.21550500 | 0.22101300  | 1.53918900  |
| H | -4.15774100 | -4.94201900 | 1.13566800  | H                                         | -7.35882600 | 1.25180800  | -0.41750200 |
| C | 1.63494000  | 1.63254700  | 4.13349200  | C                                         | -1.32091000 | 3.43993100  | -0.67683800 |
| C | -0.82599500 | 1.72920000  | 4.41589100  | C                                         | -1.39651600 | 4.77060400  | -0.23535900 |
| C | 0.48815800  | 1.37503400  | 5.10861300  | C                                         | -0.96962200 | 3.19718200  | -2.01800100 |
| H | 2.60031300  | 1.28381700  | 4.51116300  | C                                         | -1.11558200 | 5.82895500  | -1.10266200 |
| H | -0.87774800 | 2.81594100  | 4.24742500  | H                                         | -1.67393500 | 4.99935600  | 0.78798600  |
| H | 0.47993500  | 0.31499800  | 5.39729600  | C                                         | -0.70728600 | 4.25859100  | -2.88709700 |
| N | 0.13898500  | 0.72143400  | 2.31856800  | H                                         | -0.91380000 | 2.17432600  | -2.38109600 |
| C | -0.97005500 | 1.04821300  | 3.04958800  | C                                         | -0.77207400 | 5.57694300  | -2.43140500 |
| C | 1.40885300  | 0.96355000  | 2.77244000  | H                                         | -1.17133200 | 6.85110400  | -0.73714400 |
| O | -2.11428400 | 0.83326900  | 2.62359100  | H                                         | -0.44800000 | 4.05042500  | -3.92198000 |
| O | 2.40187900  | 0.67343700  | 2.09272800  | H                                         | -0.55850700 | 6.40156300  | -3.10631600 |
| H | -1.70529600 | 1.46157900  | 5.00872400  | C                                         | 3.05844400  | 1.59248400  | -0.36233200 |
| H | 0.61690300  | 1.95418700  | 6.03097600  | C                                         | 2.61272100  | 2.15959800  | -1.56717800 |
| H | 1.73734500  | 2.71415200  | 3.95576400  | C                                         | 4.42435500  | 1.31106100  | -0.21674700 |

|   |             |             |             |                          |                  |             |             |
|---|-------------|-------------|-------------|--------------------------|------------------|-------------|-------------|
| C | 3.51383500  | 2.46558500  | -2.58697700 | Pd                       | -0.25799100      | 0.15438000  | 0.02310600  |
| H | 1.55541600  | 2.35625900  | -1.71293200 | P                        | 1.79863900       | -2.30824400 | -1.81366800 |
| C | 5.32423900  | 1.60295600  | -1.24593500 | H                        | 2.74104100       | -2.88818100 | -0.96058800 |
| H | 4.79317000  | 0.86666600  | 0.70181200  | C                        | 3.48528100       | -1.26263100 | -3.57481400 |
| C | 4.87471100  | 2.18830800  | -2.43017600 | H                        | 2.97156200       | -0.30036700 | -3.50935300 |
| H | 3.14972000  | 2.91472000  | -3.50760800 | H                        | 4.30224900       | -1.26152000 | -2.84076100 |
| H | 6.38002500  | 1.37960400  | -1.11364300 | C                        | 0.92716400       | -4.81022600 | -1.81723400 |
| H | 5.57729100  | 2.42568000  | -3.22496700 | H                        | 1.72263900       | -5.14628200 | -2.49376300 |
| C | 2.83961500  | 0.56472000  | 2.33044500  | H                        | 1.25401400       | -4.91735700 | -0.77924100 |
| C | 3.55372100  | 1.33212600  | 3.26571900  | O                        | 1.31423100       | -0.95162500 | -1.42024600 |
| C | 2.93590700  | -0.83504400 | 2.38855200  | O                        | 0.66492300       | -3.40424400 | -2.06277000 |
| C | 4.32989400  | 0.71449600  | 4.24851200  | O                        | 2.54832400       | -2.31631700 | -3.25234400 |
| H | 3.52073100  | 2.41640900  | 3.22818500  | C                        | 4.01512800       | -1.52258100 | -4.97330400 |
| C | 3.72441200  | -1.44896000 | 3.36419400  | H                        | 4.52788700       | -2.48873000 | -5.02481700 |
| H | 2.39713500  | -1.44643300 | 1.67106200  | H                        | 4.72559300       | -0.73687800 | -5.25406400 |
| C | 4.41573800  | -0.67827700 | 4.30087700  | H                        | 3.19622800       | -1.52714100 | -5.69979700 |
| H | 4.87100000  | 1.32302700  | 4.96862700  | C                        | -0.35876500      | -5.57224500 | -2.07551600 |
| H | 3.79086400  | -2.53357200 | 3.39050700  | H                        | -0.19783500      | -6.64069700 | -1.89019300 |
| H | 5.02133700  | -1.15820800 | 5.06543500  | H                        | -0.68600900      | -5.44457900 | -3.11219700 |
| O | -1.40007900 | -0.03170400 | -2.46454000 | H                        | -1.15544400      | -5.21583700 | -1.41624500 |
| C | -1.55425900 | -0.52935000 | -1.36787200 |                          |                  |             |             |
| C | -2.49505800 | -1.68339400 | -1.18399500 |                          |                  |             |             |
| C | -3.03684500 | -2.02758800 | 0.05814100  |                          |                  |             |             |
| C | -2.86608700 | -2.40863500 | -2.33021800 |                          |                  |             |             |
| C | -3.94485300 | -3.08371800 | 0.15404900  |                          |                  |             |             |
| H | -2.76029200 | -1.45508600 | 0.93271800  |                          |                  |             |             |
| C | -3.75607500 | -3.47376500 | -2.22696700 |                          |                  |             |             |
| H | -2.44150000 | -2.12530200 | -3.28731100 |                          |                  |             |             |
| C | -4.29913400 | -3.81289300 | -0.98279900 |                          |                  |             |             |
| H | -4.37766000 | -3.33550600 | 1.11900800  |                          |                  |             |             |
| H | -4.03200100 | -4.03752800 | -3.11452200 |                          |                  |             |             |
| H | -5.00041500 | -4.64000000 | -0.90305900 |                          |                  |             |             |
| C | 0.02369500  | -4.09638300 | 2.68430200  |                          |                  |             |             |
| C | -1.23629800 | -2.43269900 | 4.00943700  |                          |                  |             |             |
| C | -1.23086600 | -3.88321100 | 3.52544400  |                          |                  |             |             |
| H | -0.01098600 | -5.02438500 | 2.10398300  |                          |                  |             |             |
| H | -0.36814900 | -2.25547200 | 4.66206100  |                          |                  |             |             |
| H | -2.12659500 | -4.06774000 | 2.91683300  |                          |                  |             |             |
| N | -0.32618300 | -1.75946500 | 1.76749000  |                          |                  |             |             |
| C | -1.15439900 | -1.47801800 | 2.81645300  |                          |                  |             |             |
| C | 0.32094600  | -2.95333000 | 1.69928900  |                          |                  |             |             |
| O | -1.85728300 | -0.45233700 | 2.83526700  |                          |                  |             |             |
| O | 1.20412300  | -3.17613600 | 0.85010500  |                          |                  |             |             |
| H | -2.13363500 | -2.17852900 | 4.57959900  |                          |                  |             |             |
| H | -1.26751100 | -4.58500300 | 4.36753400  |                          |                  |             |             |
| H | 0.90523300  | -4.17686200 | 3.33726600  |                          |                  |             |             |
|   |             |             |             | <b>5d</b>                |                  |             |             |
|   |             |             |             | SCF energy:              | -3364.977346     |             |             |
|   |             |             |             | SCF energy in solution:  | -3364.0357665300 |             |             |
|   |             |             |             | Free energy in solution: | -3363.2803775300 |             |             |
|   |             |             |             | P                        | 1.89194700       | 1.20887500  | 0.92926500  |
|   |             |             |             | C                        | -1.62078800      | 1.93221900  | 2.44679500  |
|   |             |             |             | H                        | -2.06035900      | 2.85803800  | 2.83721000  |
|   |             |             |             | H                        | -2.33880400      | 1.13117900  | 2.63725900  |
|   |             |             |             | C                        | 1.65225900       | 2.74277600  | 1.96539700  |
|   |             |             |             | H                        | 2.62648600       | 3.18310300  | 2.21019900  |
|   |             |             |             | H                        | 1.15319000       | 3.45723200  | 1.30305700  |
|   |             |             |             | C                        | -0.34573700      | 1.54502000  | 3.21121000  |
|   |             |             |             | H                        | -0.02294900      | 0.56165900  | 2.85536400  |
|   |             |             |             | H                        | -0.66567800      | 1.38028000  | 4.24894500  |
|   |             |             |             | C                        | 0.84193800       | 2.52176900  | 3.26147800  |
|   |             |             |             | H                        | 0.50322600       | 3.50291500  | 3.62379100  |
|   |             |             |             | H                        | 1.52866900       | 2.13860600  | 4.02572300  |
|   |             |             |             | P                        | -1.60228900      | 2.03903000  | 0.58439600  |
|   |             |             |             | C                        | -3.40484800      | 1.88780200  | 0.20914000  |
|   |             |             |             | C                        | -4.10257700      | 2.86584300  | -0.51472900 |
|   |             |             |             | C                        | -4.08784100      | 0.73905300  | 0.64840000  |
|   |             |             |             | C                        | -5.46247600      | 2.70451100  | -0.78806200 |
|   |             |             |             | H                        | -3.59263000      | 3.75554600  | -0.86785000 |
|   |             |             |             | C                        | -5.44749800      | 0.58975300  | 0.37527800  |

|   |             |             |             |                          |                  |             |             |
|---|-------------|-------------|-------------|--------------------------|------------------|-------------|-------------|
| H | -3.55861300 | -0.03960700 | 1.19221800  | H                        | -3.12726800      | -0.09793500 | -3.98036900 |
| C | -6.13855900 | 1.56865100  | -0.34212400 | C                        | -4.11190400      | -2.93270600 | -2.36326000 |
| H | -5.99067000 | 3.47144000  | -1.34858100 | H                        | -3.31211400      | -3.60984700 | -0.47393100 |
| H | -5.96462200 | -0.30193800 | 0.71929100  | H                        | -4.70750800      | -2.01488400 | -4.22697500 |
| H | -7.19720300 | 1.44496000  | -0.55519200 | H                        | -4.79975200      | -3.76881200 | -2.46594400 |
| C | -1.21694900 | 3.78922200  | 0.12835500  | C                        | -0.51523500      | -4.97240900 | 2.77100600  |
| C | -1.33400400 | 4.86059200  | 1.02828200  | C                        | -2.05904500      | -3.21215400 | 3.59597700  |
| C | -0.81759800 | 4.05687400  | -1.19365300 | C                        | -1.93833100      | -4.69777400 | 3.25492000  |
| C | -1.04337600 | 6.16492600  | 0.62289900  | H                        | -0.39138200      | -5.98047500 | 2.36318800  |
| H | -1.65029700 | 4.69067000  | 2.05208300  | H                        | -1.44303500      | -2.98237100 | 4.47904400  |
| C | -0.53943500 | 5.36405300  | -1.59769200 | H                        | -2.65397900      | -4.95047200 | 2.45991800  |
| H | -0.74245700 | 3.24178700  | -1.90831600 | N                        | -0.62769600      | -2.75168000 | 1.57384100  |
| C | -0.64461600 | 6.41997000  | -0.69021300 | C                        | -1.57679400      | -2.31844400 | 2.44448000  |
| H | -1.13234900 | 6.98087500  | 1.33525400  | C                        | -0.05760400      | -3.97484000 | 1.69780900  |
| H | -0.23783700 | 5.55407600  | -2.62427000 | O                        | -2.07268400      | -1.17898900 | 2.34789200  |
| H | -0.42023000 | 7.43576700  | -1.00446500 | O                        | 0.88734000       | -4.32595700 | 0.95712000  |
| C | 3.20514000  | 1.75264300  | -0.25994100 | H                        | -3.08352900      | -2.91673300 | 3.84147100  |
| C | 2.79421300  | 2.23968200  | -1.51226700 | H                        | -2.19180100      | -5.32533400 | 4.11838900  |
| C | 4.57934300  | 1.70902100  | 0.02437400  | H                        | 0.18673500       | -4.88950100 | 3.61496400  |
| C | 3.72920200  | 2.69414000  | -2.44363000 | Pd                       | -0.11471900      | 0.59561700  | -0.44899400 |
| H | 1.73891400  | 2.23894500  | -1.76984800 | P                        | 1.37609800       | -2.27046900 | -1.67322600 |
| C | 5.51414500  | 2.15690800  | -0.91118500 | H                        | 1.15483700       | -2.98868900 | -0.47925900 |
| H | 4.92889500  | 1.31058200  | 0.97092400  | C                        | 4.02626000       | -2.15062900 | -1.49891700 |
| C | 5.09207100  | 2.65564400  | -2.14514700 | H                        | 4.04074300       | -1.05975900 | -1.58101200 |
| H | 3.38994200  | 3.06222800  | -3.40812800 | H                        | 3.95953700       | -2.41981300 | -0.43772200 |
| H | 6.57412200  | 2.11278200  | -0.67397700 | C                        | 0.37176100       | -4.38610300 | -2.88094600 |
| H | 5.82144400  | 3.00165200  | -2.87278600 | H                        | 1.34125300       | -4.76360400 | -3.22287000 |
| C | 2.72877900  | 0.02768000  | 2.06992100  | H                        | 0.17198000       | -4.78805300 | -1.88065900 |
| C | 3.69417300  | 0.42468300  | 3.01332000  | O                        | 1.17838900       | -0.77560300 | -1.58680000 |
| C | 2.38309200  | -1.32944500 | 1.98830200  | O                        | 0.45247800       | -2.93461900 | -2.79792300 |
| C | 4.32177000  | -0.52047500 | 3.82584400  | O                        | 2.85521600       | -2.65189400 | -2.19399700 |
| H | 3.95964800  | 1.47316600  | 3.11997500  | C                        | 5.24959800       | -2.77513000 | -2.14357100 |
| C | 3.02232400  | -2.27749200 | 2.79253500  | H                        | 5.22369600       | -3.86565500 | -2.05210300 |
| H | 1.57877600  | -1.65266300 | 1.33606000  | H                        | 6.15683200       | -2.40643700 | -1.65203600 |
| C | 3.99574400  | -1.87490400 | 3.70737700  | H                        | 5.30007400       | -2.51583700 | -3.20586900 |
| H | 5.06509100  | -0.19911600 | 4.55103300  | C                        | -0.73579500      | -4.73392100 | -3.85638600 |
| H | 2.74204600  | -3.32177400 | 2.68952500  | H                        | -0.81931000      | -5.82316700 | -3.94583500 |
| H | 4.49206900  | -2.60917600 | 4.33674700  | H                        | -0.52165700      | -4.31934600 | -4.84659700 |
| O | -1.33531300 | 1.22244600  | -2.86707300 | H                        | -1.69316800      | -4.33415100 | -3.51025600 |
| C | -1.43396700 | 0.39349400  | -1.98176800 |                          |                  |             |             |
| C | -2.35562000 | -0.77747100 | -2.09164700 |                          |                  |             |             |
| C | -2.40526000 | -1.76605100 | -1.10173600 | <b>6d</b>                |                  |             |             |
| C | -3.18562400 | -0.87292100 | -3.22269900 | SCF energy:              | -3364.980829     |             |             |
| C | -3.28146700 | -2.84364100 | -1.24384600 | SCF energy in solution:  | -3364.0379390100 |             |             |
| H | -1.76840600 | -1.70229700 | -0.22264600 | Free energy in solution: | -3363.2835900100 |             |             |
| C | -4.06212300 | -1.94477800 | -3.35505400 | P                        | -0.94640600      | 2.33743800  | 0.76830500  |

|   |             |             |             |    |             |             |             |
|---|-------------|-------------|-------------|----|-------------|-------------|-------------|
| C | -2.75606000 | -0.48391500 | 2.57534800  | C  | 0.63315300  | 2.98478200  | 1.46004500  |
| H | -3.64649000 | 0.15242500  | 2.62678700  | C  | 0.88448400  | 4.36137600  | 1.58430100  |
| H | -3.01134000 | -1.41583400 | 3.08873500  | C  | 1.57766800  | 2.06490400  | 1.94189700  |
| C | -2.09954100 | 2.53840800  | 2.21877200  | C  | 2.05520400  | 4.80986600  | 2.19606500  |
| H | -2.13246400 | 3.59789500  | 2.49963500  | H  | 0.16818400  | 5.08213000  | 1.19960600  |
| H | -3.10357900 | 2.27037800  | 1.86623700  | C  | 2.74670200  | 2.52135600  | 2.55812600  |
| C | -1.55226200 | 0.19687700  | 3.26258000  | H  | 1.41536100  | 0.99387000  | 1.84225500  |
| H | -0.62461500 | -0.02226200 | 2.72548700  | C  | 2.98574700  | 3.88995000  | 2.68978900  |
| H | -1.41867500 | -0.25124700 | 4.25449800  | H  | 2.24132500  | 5.87700800  | 2.28686100  |
| C | -1.72117800 | 1.71324000  | 3.46232200  | H  | 3.47280100  | 1.79618500  | 2.91316800  |
| H | -2.50288900 | 1.89023700  | 4.21479400  | H  | 3.89727100  | 4.24191900  | 3.16613500  |
| H | -0.79189400 | 2.11160500  | 3.88622600  | O  | -1.80796500 | -1.19625000 | -2.67487900 |
| P | -2.54761300 | -0.95528200 | 0.76120500  | C  | -0.98665100 | -1.35169700 | -1.79434200 |
| C | -2.37578000 | -2.78619900 | 0.87132100  | C  | 0.00262200  | -2.47247000 | -1.81380700 |
| C | -3.18885600 | -3.65725200 | 0.13234800  | C  | 0.93861800  | -2.64672500 | -0.78773700 |
| C | -1.36870000 | -3.31593800 | 1.69781900  | C  | -0.01171300 | -3.35585700 | -2.90760000 |
| C | -3.01586900 | -5.03927600 | 0.23654800  | C  | 1.86032900  | -3.69260200 | -0.86030300 |
| H | -3.95839000 | -3.26245300 | -0.52310400 | H  | 0.94794400  | -1.97756100 | 0.06866200  |
| C | -1.20740900 | -4.69750100 | 1.79967800  | C  | 0.90195800  | -4.40248800 | -2.97011900 |
| H | -0.68388900 | -2.66139100 | 2.23304800  | H  | -0.74212400 | -3.19914200 | -3.69499500 |
| C | -2.03080400 | -5.56225200 | 1.07461600  | C  | 1.84156900  | -4.57117000 | -1.94508000 |
| H | -3.65405100 | -5.70430600 | -0.33927800 | H  | 2.59347400  | -3.81327000 | -0.06835700 |
| H | -0.42607200 | -5.09702800 | 2.44060600  | H  | 0.88879300  | -5.08591000 | -3.81535300 |
| H | -1.89846100 | -6.63790700 | 1.15565100  | H  | 2.55765300  | -5.38792200 | -1.99533900 |
| C | -4.23223400 | -0.66635600 | 0.07854600  | C  | 5.40132200  | -1.90598900 | 2.15222400  |
| C | -5.37442800 | -1.14608100 | 0.74497100  | C  | 3.28228600  | -2.33174400 | 3.39235200  |
| C | -4.39198100 | 0.07866000  | -1.09884000 | C  | 4.55860500  | -2.97621600 | 2.84791500  |
| C | -6.64812800 | -0.87927000 | 0.24531600  | H  | 6.25860100  | -2.32486300 | 1.61674400  |
| H | -5.27027800 | -1.73669900 | 1.65123100  | H  | 3.53275900  | -1.65784300 | 4.22601300  |
| C | -5.67079000 | 0.34430800  | -1.59635100 | H  | 4.29266500  | -3.76034100 | 2.12476600  |
| H | -3.51618200 | 0.43244800  | -1.63278400 | N  | 3.23731500  | -0.92897800 | 1.30616100  |
| C | -6.79784700 | -0.13094700 | -0.92620000 | C  | 2.55454500  | -1.49934100 | 2.32790500  |
| H | -7.52291600 | -1.25581300 | 0.76876100  | C  | 4.58240700  | -1.08028300 | 1.15081800  |
| H | -5.78014300 | 0.92018300  | -2.51106200 | O  | 1.31964700  | -1.34652100 | 2.44577400  |
| H | -7.79135500 | 0.07628800  | -1.31490700 | O  | 5.18452400  | -0.53954400 | 0.20582600  |
| C | -1.51269400 | 3.63712800  | -0.41316100 | H  | 2.57502100  | -3.06729200 | 3.78781900  |
| C | -0.83299000 | 3.74990000  | -1.64104200 | H  | 5.12510200  | -3.46749400 | 3.64867900  |
| C | -2.60742300 | 4.48151300  | -0.16765500 | H  | 5.80948500  | -1.20878000 | 2.90018200  |
| C | -1.23246600 | 4.69588300  | -2.58447600 | Pd | -0.89140300 | 0.14778800  | -0.41503300 |
| H | -0.00317700 | 3.08487400  | -1.85947500 | P  | 2.24886000  | 0.65127000  | -1.59273800 |
| C | -3.00798200 | 5.42204100  | -1.12053500 | H  | 2.70769300  | 0.05526400  | -0.39659800 |
| H | -3.16077700 | 4.41707700  | 0.76316200  | C  | 4.11233500  | 2.46469400  | -0.89748300 |
| C | -2.32044700 | 5.53419400  | -2.32877000 | H  | 3.60060900  | 3.10517300  | -0.17403700 |
| H | -0.69588600 | 4.76965700  | -3.52657900 | H  | 4.55718500  | 1.60981300  | -0.37869800 |
| H | -3.85814900 | 6.06671900  | -0.91291400 | C  | 3.98663200  | -0.65802100 | -3.09263000 |
| H | -2.63284500 | 6.26633200  | -3.06872000 | H  | 4.48426100  | 0.22643800  | -3.50517800 |

|                                           |             |             |             |   |             |             |             |
|-------------------------------------------|-------------|-------------|-------------|---|-------------|-------------|-------------|
| H                                         | 4.47622300  | -0.92522800 | -2.14942100 | C | -6.23593600 | 0.53771100  | 0.77594800  |
| O                                         | 0.76029800  | 0.95090500  | -1.61677200 | H | -5.03420800 | -0.68480700 | 2.06258200  |
| O                                         | 2.59628100  | -0.30620000 | -2.83247500 | C | -5.17267600 | 1.34555000  | -1.23766300 |
| O                                         | 3.11203200  | 1.98331500  | -1.84900800 | H | -3.11450700 | 0.76547400  | -1.51394300 |
| C                                         | 5.15356600  | 3.24357000  | -1.67932500 | C | -6.29674500 | 1.26624900  | -0.41535600 |
| H                                         | 5.66979000  | 2.59571500  | -2.39517700 | H | -7.11086500 | 0.46445000  | 1.41651000  |
| H                                         | 5.89925100  | 3.65452900  | -0.98903500 | H | -5.21218100 | 1.90428500  | -2.16842900 |
| H                                         | 4.69420000  | 4.07281600  | -2.22752400 | H | -7.21913700 | 1.76478300  | -0.70134400 |
| C                                         | 3.99443400  | -1.80908200 | -4.08004600 | C | -1.29500400 | 3.49877400  | -0.54902100 |
| H                                         | 5.02872700  | -2.08707700 | -4.31350300 | C | -0.71637500 | 3.44585700  | -1.83142200 |
| H                                         | 3.49199400  | -1.52544900 | -5.01067200 | C | -2.30364700 | 4.44263600  | -0.29950000 |
| H                                         | 3.48272800  | -2.68020700 | -3.66067000 | C | -1.12853700 | 4.33166400  | -2.82729400 |
|                                           |             |             |             | H | 0.04374000  | 2.69913100  | -2.04688300 |
|                                           |             |             |             | C | -2.71713400 | 5.32248100  | -1.30331100 |
| <b>TS4d</b>                               |             |             |             | H | -2.78152200 | 4.49941100  | 0.67311400  |
| SCF energy: -3364.970174                  |             |             |             | C | -2.12844900 | 5.27202000  | -2.56727300 |
| SCF energy in solution: -3364.0261843500  |             |             |             | H | -0.67287300 | 4.27716300  | -3.81242500 |
| Free energy in solution: -3363.2751483500 |             |             |             | H | -3.50056300 | 6.04628100  | -1.09342600 |
| P                                         | -0.69116000 | 2.28305300  | 0.70166600  | H | -2.45129100 | 5.95693700  | -3.34702400 |
| C                                         | -2.14334200 | -0.76718800 | 2.62326900  | C | 0.83407800  | 3.06243700  | 1.38876700  |
| H                                         | -3.13060200 | -0.57241200 | 3.05952500  | C | 0.94542900  | 4.45172700  | 1.56254800  |
| H                                         | -1.85746500 | -1.77868000 | 2.91910400  | C | 1.90364500  | 2.23868600  | 1.77057500  |
| C                                         | -1.89826600 | 2.44534900  | 2.11207700  | C | 2.10047000  | 5.00432400  | 2.11607500  |
| H                                         | -2.02026500 | 3.50123200  | 2.38106200  | H | 0.13324100  | 5.10430100  | 1.25326500  |
| H                                         | -2.86551500 | 2.09347500  | 1.73424200  | C | 3.06080500  | 2.79582700  | 2.32247200  |
| C                                         | -1.08655800 | 0.19206700  | 3.19796000  | H | 1.84163700  | 1.16303200  | 1.62939800  |
| H                                         | -0.17134300 | 0.10093600  | 2.60536200  | C | 3.16047800  | 4.17676600  | 2.49776400  |
| H                                         | -0.82425800 | -0.19188700 | 4.19185700  | H | 2.17555300  | 6.08118100  | 2.24398300  |
| C                                         | -1.48849600 | 1.66383800  | 3.37448600  | H | 3.88883600  | 2.14579500  | 2.59089600  |
| H                                         | -2.32342000 | 1.72703200  | 4.08707100  | H | 4.06280400  | 4.60964500  | 2.92189700  |
| H                                         | -0.64598400 | 2.18401100  | 3.84726300  | O | -1.50013400 | -1.14612100 | -2.72181000 |
| P                                         | -2.32898200 | -0.87219900 | 0.75551800  | C | -0.74112900 | -1.41650900 | -1.81281000 |
| C                                         | -2.73849600 | -2.65734900 | 0.52064900  | C | 0.06135800  | -2.67759500 | -1.79256900 |
| C                                         | -3.84002200 | -3.06783600 | -0.24478100 | C | 0.97109300  | -2.94680900 | -0.76487000 |
| C                                         | -1.88661900 | -3.62973700 | 1.07376600  | C | -0.11610600 | -3.60513400 | -2.83279200 |
| C                                         | -4.09812700 | -4.42650400 | -0.43719600 | C | 1.70210800  | -4.13552800 | -0.77886000 |
| H                                         | -4.50001900 | -2.33209700 | -0.69184200 | H | 1.11223700  | -2.23385600 | 0.04339600  |
| C                                         | -2.15507900 | -4.98495000 | 0.88201900  | C | 0.61025400  | -4.79208900 | -2.83965800 |
| H                                         | -1.00630100 | -3.33432500 | 1.63911600  | H | -0.82426100 | -3.37386000 | -3.62216000 |
| C                                         | -3.26026500 | -5.38767300 | 0.12922100  | C | 1.52222900  | -5.05905900 | -1.81088800 |
| H                                         | -4.95691100 | -4.72998200 | -1.03018400 | H | 2.41010800  | -4.33804000 | 0.02036500  |
| H                                         | -1.49009600 | -5.72658600 | 1.31616400  | H | 0.46968000  | -5.51074000 | -3.64314900 |
| H                                         | -3.46353200 | -6.44492300 | -0.01987300 | H | 2.08909500  | -5.98711700 | -1.81655600 |
| C                                         | -3.91046000 | -0.01817500 | 0.33135500  | C | 4.76970900  | -1.56377200 | 2.78974500  |
| C                                         | -5.05384400 | -0.10452100 | 1.14444500  | C | 2.86122400  | -2.55469300 | 4.04304400  |
| C                                         | -3.98538900 | 0.70854700  | -0.86759400 | C | 4.29599700  | -2.79251700 | 3.56674200  |

|                                           |             |             |             |   |             |             |             |
|-------------------------------------------|-------------|-------------|-------------|---|-------------|-------------|-------------|
| H                                         | 5.70963600  | -1.73546700 | 2.25670400  | H | 1.13958600  | 0.21198300  | 4.29459500  |
| H                                         | 2.84696400  | -1.74264300 | 4.78624100  | C | 1.69746600  | -1.64271300 | 3.40225600  |
| H                                         | 4.32398300  | -3.67477000 | 2.91314400  | H | 2.48802900  | -1.77202700 | 4.15534100  |
| N                                         | 2.44315800  | -1.38802400 | 1.84412900  | H | 0.81141100  | -2.15179300 | 3.80057000  |
| C                                         | 1.94341400  | -2.14461000 | 2.88741300  | P | 2.55712700  | 0.99414000  | 0.85618800  |
| C                                         | 3.73047400  | -1.09567900 | 1.77811000  | C | 2.88855900  | 2.80728000  | 0.72385900  |
| O                                         | 0.75627600  | -2.47221400 | 2.91745300  | C | 3.92323900  | 3.31615200  | -0.07426300 |
| O                                         | 4.20134900  | -0.35512100 | 0.83768700  | C | 2.03822600  | 3.70886700  | 1.38657000  |
| H                                         | 2.42377700  | -3.43438900 | 4.52260300  | C | 4.11649400  | 4.69454300  | -0.18728100 |
| H                                         | 4.96391800  | -3.00183000 | 4.41013500  | H | 4.58085100  | 2.64076600  | -0.61077600 |
| H                                         | 4.95311100  | -0.72662400 | 3.48010400  | C | 2.23631100  | 5.08421300  | 1.27475200  |
| Pd                                        | -0.56532400 | 0.05526000  | -0.42056700 | H | 1.20368700  | 3.34235500  | 1.97821400  |
| P                                         | 2.62301200  | 0.39531700  | -1.53600900 | C | 3.27874000  | 5.58129600  | 0.48946000  |
| H                                         | 3.42140200  | -0.06565900 | -0.10038000 | H | 4.92516200  | 5.07207700  | -0.80727500 |
| C                                         | 3.67754300  | 2.84981600  | -1.57230900 | H | 1.56784800  | 5.76618100  | 1.79283800  |
| H                                         | 2.73165100  | 3.40057900  | -1.50001500 | H | 3.43118700  | 6.65344300  | 0.40020400  |
| H                                         | 4.02444900  | 2.64518200  | -0.55062200 | C | 4.14249600  | 0.23402500  | 0.29756000  |
| C                                         | 4.05326300  | -1.27230700 | -3.02921400 | C | 5.32563800  | 0.33596700  | 1.05035000  |
| H                                         | 4.69611900  | -0.48098000 | -3.43261200 | C | 4.17962800  | -0.43162900 | -0.93759200 |
| H                                         | 4.51856300  | -1.65267700 | -2.10857000 | C | 6.51185800  | -0.23109600 | 0.58561500  |
| O                                         | 1.13534400  | 0.80520000  | -1.51548200 | H | 5.33244200  | 0.87098500  | 1.99607100  |
| O                                         | 2.76000600  | -0.71874400 | -2.72808200 | C | 5.37086300  | -0.99433500 | -1.40320900 |
| O                                         | 3.45738300  | 1.61713200  | -2.27569100 | H | 3.27632100  | -0.50350400 | -1.53611900 |
| C                                         | 4.71433300  | 3.65516000  | -2.33821400 | C | 6.53579500  | -0.89937300 | -0.64191800 |
| H                                         | 5.66286700  | 3.11067100  | -2.39322300 | H | 7.41815900  | -0.14655400 | 1.17933800  |
| H                                         | 4.89212200  | 4.61547600  | -1.84035000 | H | 5.38061900  | -1.50905100 | -2.35961000 |
| H                                         | 4.37105900  | 3.85107600  | -3.35938900 | H | 7.46129200  | -1.34003900 | -1.00279900 |
| C                                         | 3.86635500  | -2.39129000 | -4.03955000 | C | 1.70481500  | -3.29110600 | -0.61424500 |
| H                                         | 4.83722400  | -2.82957600 | -4.29994100 | C | 1.13157800  | -3.22324400 | -1.89855300 |
| H                                         | 3.40228100  | -2.00639200 | -4.95341400 | C | 2.79144400  | -4.15324500 | -0.39998500 |
| H                                         | 3.22367100  | -3.17638700 | -3.63020400 | C | 1.63073800  | -4.01385800 | -2.93381100 |
|                                           |             |             |             | H | 0.30380100  | -2.54285000 | -2.08279100 |
|                                           |             |             |             | C | 3.29078900  | -4.93774800 | -1.44316200 |
| <b>TS5d</b>                               |             |             |             | H | 3.26127700  | -4.22066600 | 0.57603300  |
| SCF energy: -3364.974927                  |             |             |             | C | 2.71060400  | -4.87199600 | -2.71042900 |
| SCF energy in solution: -3364.028773      |             |             |             | H | 1.17791700  | -3.95067800 | -3.91966300 |
| Free energy in solution: -3363.2783487600 |             |             |             | H | 4.13329500  | -5.60011000 | -1.26112100 |
| P                                         | 0.99249300  | -2.19476500 | 0.68546200  | H | 3.09998800  | -5.48297700 | -3.52065100 |
| C                                         | 2.49406400  | 0.74974100  | 2.72448300  | C | -0.50240600 | -3.10018300 | 1.27176800  |
| H                                         | 3.47561500  | 0.39056800  | 3.05554600  | C | -0.58594300 | -4.50148400 | 1.22134700  |
| H                                         | 2.38306900  | 1.75695800  | 3.13546500  | C | -1.56776300 | -2.36805400 | 1.81820700  |
| C                                         | 2.16042300  | -2.37189800 | 2.12705700  | C | -1.71106400 | -5.15944800 | 1.71865900  |
| H                                         | 2.29879600  | -3.43375100 | 2.36302300  | H | 0.22353800  | -5.07938700 | 0.78465200  |
| H                                         | 3.13185500  | -1.98614600 | 1.79348100  | C | -2.69033800 | -3.03366200 | 2.31897200  |
| C                                         | 1.36855800  | -0.14459600 | 3.28192200  | H | -1.53345100 | -1.28183200 | 1.84812300  |
| H                                         | 0.45091700  | 0.01246900  | 2.70490400  | C | -2.76484800 | -4.42629400 | 2.27133900  |



|    |             |             |             |                          |                  |             |             |
|----|-------------|-------------|-------------|--------------------------|------------------|-------------|-------------|
| H  | -1.76627200 | -6.24397900 | 1.67065100  | C                        | -3.86148900      | 2.44234000  | -3.72984700 |
| H  | -3.51338000 | -2.45478400 | 2.72836900  | H                        | -4.85294900      | 2.70893500  | -4.11507000 |
| H  | -3.64285300 | -4.93993600 | 2.65441300  | H                        | -3.14669700      | 2.47403100  | -4.55898000 |
| O  | 1.46839500  | 1.66744300  | -2.47298500 | H                        | -3.56007800      | 3.18990800  | -2.98926000 |
| C  | 0.74076400  | 1.72149100  | -1.50349300 |                          |                  |             |             |
| C  | -0.18474200 | 2.87374200  | -1.26187300 |                          |                  |             |             |
| C  | -1.03080300 | 2.91055700  | -0.14760200 |                          |                  |             |             |
| C  | -0.18413400 | 3.94021000  | -2.17587400 |                          |                  |             |             |
| C  | -1.87163000 | 4.00697900  | 0.05049500  |                          |                  |             |             |
| H  | -1.04019400 | 2.08535600  | 0.56102800  |                          |                  |             |             |
| C  | -1.02156300 | 5.03287700  | -1.97304400 |                          |                  |             |             |
| H  | 0.47796300  | 3.88866300  | -3.03428100 |                          |                  |             |             |
| C  | -1.86772200 | 5.06772600  | -0.85792000 |                          |                  |             |             |
| H  | -2.52976900 | 4.02967700  | 0.91500900  |                          |                  |             |             |
| H  | -1.01951700 | 5.85796200  | -2.68077800 |                          |                  |             |             |
| H  | -2.52259800 | 5.92142000  | -0.70079200 |                          |                  |             |             |
| C  | -6.08454100 | 1.10286100  | 1.98551500  |                          |                  |             |             |
| C  | -4.03403500 | 1.55311900  | 3.33070200  |                          |                  |             |             |
| C  | -5.35584800 | 2.14429800  | 2.83638100  |                          |                  |             |             |
| H  | -6.97705200 | 1.50352000  | 1.49628100  |                          |                  |             |             |
| H  | -4.23341600 | 0.74323500  | 4.04887500  |                          |                  |             |             |
| H  | -5.15451200 | 3.03803600  | 2.22986500  |                          |                  |             |             |
| N  | -3.82682100 | 0.48365800  | 1.08127800  |                          |                  |             |             |
| C  | -3.19955000 | 0.96125600  | 2.19172800  |                          |                  |             |             |
| C  | -5.18754700 | 0.51436500  | 0.89396100  |                          |                  |             |             |
| O  | -1.96420400 | 0.90790500  | 2.31170700  |                          |                  |             |             |
| O  | -5.69170400 | 0.05743100  | -0.13526200 |                          |                  |             |             |
| H  | -3.41120700 | 2.28659300  | 3.85140500  |                          |                  |             |             |
| H  | -5.97833600 | 2.46812500  | 3.67888500  |                          |                  |             |             |
| H  | -6.42051100 | 0.26911000  | 2.62065500  |                          |                  |             |             |
| Pd | 0.76651600  | 0.08992200  | -0.28986500 |                          |                  |             |             |
| P  | -2.37821500 | -0.38380700 | -1.47968800 |                          |                  |             |             |
| H  | -3.10546700 | 0.05035100  | -0.09618300 |                          |                  |             |             |
| C  | -3.83596900 | -2.62905600 | -1.36215500 |                          |                  |             |             |
| H  | -3.12480300 | -3.17939200 | -0.73514400 |                          |                  |             |             |
| H  | -4.54513400 | -2.09781500 | -0.71901200 |                          |                  |             |             |
| C  | -3.90041600 | 1.05613600  | -3.11042300 |                          |                  |             |             |
| H  | -4.20760700 | 0.30111900  | -3.84265300 |                          |                  |             |             |
| H  | -4.60457500 | 1.01437100  | -2.27079000 |                          |                  |             |             |
| O  | -0.86607700 | -0.68775600 | -1.43556900 |                          |                  |             |             |
| O  | -2.56566000 | 0.72600300  | -2.65987000 |                          |                  |             |             |
| O  | -3.12140100 | -1.66931700 | -2.17330100 |                          |                  |             |             |
| C  | -4.56295400 | -3.57473300 | -2.30286500 |                          |                  |             |             |
| H  | -5.27788900 | -3.02493900 | -2.92352900 |                          |                  |             |             |
| H  | -5.11217500 | -4.32907000 | -1.72735100 |                          |                  |             |             |
| H  | -3.85472800 | -4.08789400 | -2.96204700 |                          |                  |             |             |
|    |             |             |             | <b>7d</b>                |                  |             |             |
|    |             |             |             | SCF energy:              | -2965.009046     |             |             |
|    |             |             |             | SCF energy in solution:  | -2964.1751984000 |             |             |
|    |             |             |             | Free energy in solution: | -2963.5329434000 |             |             |
|    |             |             |             | P                        | 0.93437200       | -1.85692800 | 0.60356200  |
|    |             |             |             | C                        | 3.21484700       | 0.76051300  | 2.42493500  |
|    |             |             |             | H                        | 4.19760500       | 0.27461400  | 2.44550100  |
|    |             |             |             | H                        | 3.33863600       | 1.72400000  | 2.92745800  |
|    |             |             |             | C                        | 2.41949000       | -2.20870200 | 1.68376800  |
|    |             |             |             | H                        | 2.55456800       | -3.29366500 | 1.76628900  |
|    |             |             |             | H                        | 3.29687200       | -1.82185000 | 1.15195700  |
|    |             |             |             | C                        | 2.17561500       | -0.08218700 | 3.19267600  |
|    |             |             |             | H                        | 1.16685300       | 0.20192900  | 2.86850800  |
|    |             |             |             | H                        | 2.24079400       | 0.18777900  | 4.25491200  |
|    |             |             |             | C                        | 2.35561100       | -1.60592200 | 3.09692000  |
|    |             |             |             | H                        | 3.28736100       | -1.88035900 | 3.61212900  |
|    |             |             |             | H                        | 1.54401300       | -2.08620600 | 3.65643200  |
|    |             |             |             | P                        | 2.79171400       | 1.18412500  | 0.63509300  |
|    |             |             |             | C                        | 3.26329300       | 2.97038400  | 0.55655600  |
|    |             |             |             | C                        | 4.08541500       | 3.47815800  | -0.45934900 |
|    |             |             |             | C                        | 2.72492100       | 3.86307000  | 1.49906800  |
|    |             |             |             | C                        | 4.38084000       | 4.84169700  | -0.51598300 |
|    |             |             |             | H                        | 4.49610200       | 2.81321300  | -1.21122600 |
|    |             |             |             | C                        | 3.02536700       | 5.22345800  | 1.44324400  |
|    |             |             |             | H                        | 2.05102400       | 3.50515400  | 2.27331100  |
|    |             |             |             | C                        | 3.85770800       | 5.71671300  | 0.43630200  |
|    |             |             |             | H                        | 5.02123400       | 5.21745600  | -1.30945300 |
|    |             |             |             | H                        | 2.59953600       | 5.89764300  | 2.18123500  |
|    |             |             |             | H                        | 4.08987400       | 6.77723900  | 0.39055700  |
|    |             |             |             | C                        | 4.08424800       | 0.36760000  | -0.39484000 |
|    |             |             |             | C                        | 5.43951900       | 0.34651000  | -0.02082900 |
|    |             |             |             | C                        | 3.70573200       | -0.21738000 | -1.61282100 |
|    |             |             |             | C                        | 6.39048700       | -0.25860800 | -0.84157700 |
|    |             |             |             | H                        | 5.76100900       | 0.81660800  | 0.90475500  |
|    |             |             |             | C                        | 4.66194000       | -0.81803400 | -2.43653200 |
|    |             |             |             | H                        | 2.66157300       | -0.20263500 | -1.91337200 |
|    |             |             |             | C                        | 6.00232400       | -0.84267600 | -2.05133000 |
|    |             |             |             | H                        | 7.43464300       | -0.26934000 | -0.54036600 |
|    |             |             |             | H                        | 4.35167300       | -1.27034700 | -3.37392000 |
|    |             |             |             | H                        | 6.74523200       | -1.31226100 | -2.69056500 |

|    |             |             |             |                                           |             |             |             |
|----|-------------|-------------|-------------|-------------------------------------------|-------------|-------------|-------------|
| C  | 1.18184000  | -3.03786700 | -0.79458600 | C                                         | -4.59206200 | -3.01860200 | -1.85158600 |
| C  | 0.09012500  | -3.31607300 | -1.63633600 | H                                         | -4.67271300 | -2.79146200 | -2.92024800 |
| C  | 2.42343700  | -3.63064000 | -1.07524600 | H                                         | -5.59177600 | -3.26228700 | -1.47109000 |
| C  | 0.24212000  | -4.18364200 | -2.71798200 | H                                         | -3.95623200 | -3.90361500 | -1.73725400 |
| H  | -0.87447700 | -2.84879200 | -1.46105200 | C                                         | 0.07822200  | -0.44825100 | -4.90905500 |
| C  | 2.56954800  | -4.49353800 | -2.16459700 | H                                         | -0.11859900 | -0.62314000 | -5.97402900 |
| H  | 3.28876400  | -3.42897000 | -0.45315800 | H                                         | 0.76866300  | -1.22093200 | -4.55345000 |
| C  | 1.47876600  | -4.77586200 | -2.98672600 | H                                         | 0.56210100  | 0.52760500  | -4.79704000 |
| H  | -0.61315900 | -4.39174400 | -3.35551900 |                                           |             |             |             |
| H  | 3.53750200  | -4.94689400 | -2.36323100 |                                           |             |             |             |
| H  | 1.59148000  | -5.44996100 | -3.83200700 | <b>8d</b>                                 |             |             |             |
| C  | -0.43047600 | -2.62238200 | 1.58199800  | SCF energy: -2965.030282                  |             |             |             |
| C  | -0.37015600 | -3.96579500 | 1.98944100  | SCF energy in solution: -2964.2046276400  |             |             |             |
| C  | -1.53079800 | -1.84045000 | 1.96196400  | Free energy in solution: -2963.5596906400 |             |             |             |
| C  | -1.38182100 | -4.51164000 | 2.77829400  | P                                         | 0.95818500  | -1.94317200 | 0.53958900  |
| H  | 0.46247500  | -4.59242000 | 1.67981100  | C                                         | 3.15104800  | 0.77999800  | 2.46486400  |
| C  | -2.54206500 | -2.39124500 | 2.75595000  | H                                         | 4.19636800  | 0.45203300  | 2.51058700  |
| H  | -1.61112200 | -0.82186000 | 1.59536200  | H                                         | 3.10342700  | 1.72607000  | 3.01196900  |
| C  | -2.46774600 | -3.72188800 | 3.16823100  | C                                         | 2.56036200  | -2.23347100 | 1.46847200  |
| H  | -1.32542200 | -5.55260600 | 3.08607700  | H                                         | 2.76635800  | -3.31042300 | 1.47500600  |
| H  | -3.39257100 | -1.77794100 | 3.04232300  | H                                         | 3.36299500  | -1.76341000 | 0.89071400  |
| H  | -3.25628100 | -4.14795600 | 3.78323300  | C                                         | 2.23276000  | -0.24477700 | 3.15638800  |
| O  | 0.80447700  | 2.73752200  | -1.79173000 | H                                         | 1.18934600  | -0.04719800 | 2.88050100  |
| C  | 0.34074200  | 2.45181100  | -0.70856000 | H                                         | 2.29549100  | -0.06824800 | 4.23854000  |
| C  | -0.49814500 | 3.42743500  | 0.06943900  | C                                         | 2.57319100  | -1.72422700 | 2.92074600  |
| C  | -1.10413000 | 3.08307900  | 1.28393600  | H                                         | 3.57457800  | -1.92216900 | 3.32953800  |
| C  | -0.65042200 | 4.72901200  | -0.43447800 | H                                         | 1.87656000  | -2.33025400 | 3.51107900  |
| C  | -1.84882600 | 4.02808200  | 1.98999200  | P                                         | 2.72361900  | 1.21397500  | 0.68190400  |
| H  | -1.00438000 | 2.06743500  | 1.65262400  | C                                         | 3.07936100  | 3.02937200  | 0.65119300  |
| C  | -1.39264200 | 5.67207700  | 0.27164800  | C                                         | 3.87236000  | 3.61295000  | -0.34779400 |
| H  | -0.17617100 | 4.97778900  | -1.37855400 | C                                         | 2.47816800  | 3.86548800  | 1.60724200  |
| C  | -1.99221000 | 5.32339700  | 1.48635100  | C                                         | 4.08134800  | 4.99313200  | -0.37134100 |
| H  | -2.32515800 | 3.75230000  | 2.92729900  | H                                         | 4.32952500  | 2.99396400  | -1.11205100 |
| H  | -1.50590300 | 6.67908500  | -0.12190200 | C                                         | 2.69261900  | 5.24313700  | 1.58505200  |
| H  | -2.57386700 | 6.05910900  | 2.03627800  | H                                         | 1.81998200  | 3.44978500  | 2.36551500  |
| Pd | 0.64705200  | 0.57158400  | 0.00353800  | C                                         | 3.49928900  | 5.81126500  | 0.59718100  |
| P  | -2.20863500 | 0.07727000  | -1.70329700 | H                                         | 4.70146700  | 5.42646800  | -1.15148300 |
| C  | -4.00274000 | -1.83447200 | -1.09592700 | H                                         | 2.21816000  | 5.87155700  | 2.33361800  |
| H  | -3.95300800 | -2.05682000 | -0.02077700 | H                                         | 3.66472700  | 6.88504200  | 0.57771800  |
| H  | -4.64639200 | -0.94947800 | -1.22036800 | C                                         | 4.09343500  | 0.51206900  | -0.33718700 |
| C  | -1.21827600 | -0.49007100 | -4.11422800 | C                                         | 5.44138200  | 0.58993700  | 0.05383400  |
| H  | -1.70197200 | -1.47176600 | -4.21733200 | C                                         | 3.77889600  | -0.09414200 | -1.56312000 |
| H  | -1.92212500 | 0.26625400  | -4.49398500 | C                                         | 6.44612100  | 0.06123800  | -0.75595400 |
| O  | -1.42368800 | 0.36660600  | -0.36917000 | H                                         | 5.71456100  | 1.07764000  | 0.98568400  |
| O  | -0.92131500 | -0.24166000 | -2.74076600 | C                                         | 4.78682200  | -0.61951100 | -2.37614900 |
| O  | -2.69058200 | -1.56331700 | -1.58187200 | H                                         | 2.74000500  | -0.15447600 | -1.87620200 |

|    |             |             |             |                                           |             |             |             |
|----|-------------|-------------|-------------|-------------------------------------------|-------------|-------------|-------------|
| C  | 6.12015700  | -0.54564000 | -1.97254500 | H                                         | 0.52949000  | 0.44233800  | -3.33763700 |
| H  | 7.48388900  | 0.12761400  | -0.44028600 | O                                         | -2.25075900 | -1.28222700 | -0.57776300 |
| H  | 4.52459900  | -1.08740200 | -3.32080800 | O                                         | -1.11379400 | -0.70314700 | -2.76415200 |
| H  | 6.90469500  | -0.95558900 | -2.60288700 | O                                         | -2.36534100 | 1.16631100  | -1.47085500 |
| C  | 1.07807100  | -3.16114300 | -0.84152700 | C                                         | -4.20163300 | 0.89671100  | -3.08129200 |
| C  | -0.10211800 | -3.59358900 | -1.47235300 | H                                         | -3.81904400 | 1.73041000  | -3.68046500 |
| C  | 2.31511700  | -3.62568900 | -1.31748400 | H                                         | -5.29550900 | 0.88373000  | -3.16898900 |
| C  | -0.03660200 | -4.48932500 | -2.53934500 | H                                         | -3.81074100 | -0.03802800 | -3.49474300 |
| H  | -1.06345000 | -3.20987300 | -1.14226200 | C                                         | -0.29160500 | -0.67216500 | -5.00813100 |
| C  | 2.37228500  | -4.51750600 | -2.39129400 | H                                         | 0.22116900  | -0.07281700 | -5.77001800 |
| H  | 3.24340400  | -3.29899800 | -0.86009300 | H                                         | -1.27025500 | -0.96834900 | -5.40099900 |
| C  | 1.19653600  | -4.95525000 | -3.00168800 | H                                         | 0.29089500  | -1.58176600 | -4.82624200 |
| H  | -0.95684200 | -4.81558100 | -3.01624400 |                                           |             |             |             |
| H  | 3.33762000  | -4.87198600 | -2.74403300 |                                           |             |             |             |
| H  | 1.24085600  | -5.65191700 | -3.83490400 |                                           |             |             |             |
| C  | -0.25417900 | -2.70922200 | 1.69915700  | <b>TS6d</b>                               |             |             |             |
| C  | -0.14219000 | -4.06036200 | 2.06587400  | SCF energy: -2964.955255                  |             |             |             |
| C  | -1.26834600 | -1.93072700 | 2.27046900  | SCF energy in solution: -2964.1254632600  |             |             |             |
| C  | -1.02007000 | -4.61602400 | 2.99614700  | Free energy in solution: -2963.4827012600 |             |             |             |
| H  | 0.62313000  | -4.68565900 | 1.61340400  | P                                         | -2.23325600 | 0.09502400  | -1.04532000 |
| C  | -2.14412900 | -2.48698800 | 3.20527900  | C                                         | 0.08598400  | -2.74789700 | -2.53564000 |
| H  | -1.39563200 | -0.90297400 | 1.95056600  | H                                         | 0.16474400  | -2.18680300 | -3.47259700 |
| C  | -2.02041100 | -3.82743500 | 3.57117900  | H                                         | 0.66472300  | -3.66358300 | -2.68502400 |
| H  | -0.92647500 | -5.66421400 | 3.26808700  | C                                         | -2.17751500 | -0.62165800 | -2.76753200 |
| H  | -2.93366700 | -1.87473800 | 3.63257400  | H                                         | -2.89835300 | -0.08225700 | -3.39314900 |
| H  | -2.70655100 | -4.26130100 | 4.29393600  | H                                         | -1.18923600 | -0.33132700 | -3.14521700 |
| O  | 0.74034500  | 2.66267600  | -1.94610800 | C                                         | -1.39254700 | -3.07318300 | -2.23119200 |
| C  | 0.23514100  | 2.31572000  | -0.89333900 | H                                         | -1.56778700 | -3.05646300 | -1.14816800 |
| C  | -0.54963800 | 3.29944600  | -0.06163900 | H                                         | -1.61134400 | -4.09676600 | -2.56041500 |
| C  | -1.14970400 | 2.92489100  | 1.14565500  | C                                         | -2.39108900 | -2.13924600 | -2.93781000 |
| C  | -0.66262700 | 4.62596500  | -0.50303700 | H                                         | -2.34750200 | -2.34409000 | -4.01713900 |
| C  | -1.85090300 | 3.85979600  | 1.90769900  | H                                         | -3.40238300 | -2.41450100 | -2.61785800 |
| H  | -1.07201000 | 1.88972900  | 1.47113900  | P                                         | 0.94455700  | -1.72375000 | -1.22094500 |
| C  | -1.36341000 | 5.56095000  | 0.25513100  | C                                         | 2.15938300  | -2.87758100 | -0.44799300 |
| H  | -0.19209600 | 4.89977700  | -1.44213200 | C                                         | 3.24245000  | -2.32368100 | 0.25603100  |
| C  | -1.95757500 | 5.18030800  | 1.46313400  | C                                         | 1.99104100  | -4.27022800 | -0.45828600 |
| H  | -2.32030500 | 3.55887200  | 2.84092800  | C                                         | 4.15376900  | -3.15769800 | 0.90343400  |
| H  | -1.44895800 | 6.58758700  | -0.09238100 | H                                         | 3.36363500  | -1.24511700 | 0.32364300  |
| H  | -2.50649200 | 5.91002200  | 2.05331000  | C                                         | 2.90651100  | -5.09879200 | 0.19472200  |
| Pd | 0.57522800  | 0.41975500  | -0.17167100 | H                                         | 1.14455600  | -4.72553400 | -0.96408400 |
| P  | -1.44158200 | -0.18548100 | -1.22241000 | C                                         | 3.99381100  | -4.54483000 | 0.87054400  |
| C  | -3.79505100 | 1.05166100  | -1.62117400 | H                                         | 4.98675300  | -2.71557000 | 1.44237100  |
| H  | -4.15012100 | 0.20576200  | -1.02436300 | H                                         | 2.76560500  | -6.17630400 | 0.17335100  |
| H  | -4.20523900 | 1.97571300  | -1.20000800 | H                                         | 4.70666800  | -5.18947800 | 1.37768900  |
| C  | -0.44663500 | 0.12950700  | -3.72541900 | C                                         | 1.98645300  | -0.54362100 | -2.16853100 |
| H  | -1.03725000 | 1.03734300  | -3.89686600 | C                                         | 2.59711900  | -0.91325700 | -3.38131900 |
|    |             |             |             | C                                         | 2.20775400  | 0.73714200  | -1.64604100 |

|    |             |             |             |                                           |            |             |             |
|----|-------------|-------------|-------------|-------------------------------------------|------------|-------------|-------------|
| C  | 3.39889400  | -0.00205400 | -4.06588700 | H                                         | 1.59633900 | 5.18724700  | 0.91943700  |
| H  | 2.46161100  | -1.91185200 | -3.78864800 | H                                         | 2.41110700 | 4.61382900  | 2.38066300  |
| C  | 3.02086800  | 1.64304000  | -2.33304100 | C                                         | 4.79664000 | 1.55280400  | 1.59208900  |
| H  | 1.77827500  | 1.01953200  | -0.69018000 | H                                         | 5.08268600 | 2.23092800  | 0.77459400  |
| C  | 3.60877700  | 1.27930900  | -3.54337100 | H                                         | 4.82168600 | 2.14303100  | 2.52349300  |
| H  | 3.86559400  | -0.29325500 | -5.00343800 | O                                         | 0.98225900 | 1.21820900  | 1.36004600  |
| H  | 3.18549900  | 2.62279200  | -1.89481200 | O                                         | 3.49154800 | 1.04271500  | 1.35969200  |
| H  | 4.23801400  | 1.98510300  | -4.07989500 | O                                         | 2.40621400 | 3.29602200  | 0.77174500  |
| C  | -2.00387200 | 1.88913000  | -1.39558300 | C                                         | 3.74965300 | 5.31979200  | 0.83373700  |
| C  | -0.90902800 | 2.56512400  | -0.83978100 | H                                         | 4.63116400 | 4.80372900  | 1.22929600  |
| C  | -2.89876500 | 2.58316400  | -2.22916600 | H                                         | 3.76919700 | 6.35922000  | 1.18618800  |
| C  | -0.69837000 | 3.91410600  | -1.14346600 | H                                         | 3.82369400 | 5.32726400  | -0.25988700 |
| H  | -0.22376000 | 2.06262400  | -0.15846000 | C                                         | 5.79068900 | 0.40261500  | 1.69314200  |
| C  | -2.68653000 | 3.92888100  | -2.51983800 | H                                         | 6.80582600 | 0.78137200  | 1.86601300  |
| H  | -3.77033100 | 2.07965000  | -2.63992300 | H                                         | 5.79940100 | -0.18468900 | 0.76768400  |
| C  | -1.57963500 | 4.59476100  | -1.98176700 | H                                         | 5.52264200 | -0.26208700 | 2.52201900  |
| H  | 0.16643600  | 4.41339400  | -0.71741400 |                                           |            |             |             |
| H  | -3.38384100 | 4.45891400  | -3.16359500 |                                           |            |             |             |
| H  | -1.41340800 | 5.64369800  | -2.21413700 | <b>9d</b>                                 |            |             |             |
| C  | -4.01156400 | -0.00328100 | -0.55233900 | SCF energy: -2965.003538                  |            |             |             |
| C  | -5.03312100 | -0.42348700 | -1.41943300 | SCF energy in solution: -2964.1583639900  |            |             |             |
| C  | -4.36256200 | 0.42031700  | 0.74060900  | Free energy in solution: -2963.5222569900 |            |             |             |
| C  | -6.36642700 | -0.42963100 | -1.00194200 | P                                         | 0.61393200 | -2.07819900 | 0.90911800  |
| H  | -4.80603700 | -0.74037800 | -2.43140800 | C                                         | 3.35068100 | 1.04364400  | 1.53747700  |
| C  | -5.69468100 | 0.42040400  | 1.15275600  | H                                         | 3.11160600 | 2.00400100  | 1.06907100  |
| H  | -3.59397800 | 0.75589600  | 1.42877000  | H                                         | 3.51333500 | 0.33787200  | 0.71546000  |
| C  | -6.70100200 | -0.00869600 | 0.28495300  | C                                         | 2.21220800 | -1.96599600 | 1.86635900  |
| H  | -7.14169400 | -0.75971000 | -1.68846800 | H                                         | 2.44145000 | -2.92975200 | 2.33460800  |
| H  | -5.94175400 | 0.75186700  | 2.15732700  | H                                         | 3.00065900 | -1.79229300 | 1.12497900  |
| H  | -7.73833700 | -0.01293800 | 0.60865700  | C                                         | 2.17276000 | 0.58590600  | 2.41220200  |
| O  | 0.96377600  | -1.95715300 | 2.84208600  | H                                         | 1.22705900 | 0.73520000  | 1.84046600  |
| C  | 0.27097900  | -1.48566000 | 2.04360700  | H                                         | 2.06426600 | 1.26689800  | 3.26552600  |
| C  | -1.47215800 | -0.71722500 | 2.43921500  | C                                         | 2.22915900 | -0.85829900 | 2.93744800  |
| C  | -1.42187200 | 0.51122000  | 3.11326400  | H                                         | 3.14768500 | -0.97745400 | 3.52582700  |
| C  | -2.42152500 | -1.68712600 | 2.79355900  | H                                         | 1.39499600 | -1.01253700 | 3.63292500  |
| C  | -2.35613500 | 0.77659900  | 4.11808300  | P                                         | 4.97018600 | 1.17186400  | 2.49953800  |
| H  | -0.64950100 | 1.22256500  | 2.83338600  | C                                         | 6.08608400 | 1.85496800  | 1.18716100  |
| C  | -3.34819100 | -1.41247900 | 3.80099800  | C                                         | 6.94719300 | 2.93643300  | 1.43635400  |
| H  | -2.43478900 | -2.65120700 | 2.29203300  | C                                         | 6.18449300 | 1.20299600  | -0.05482500 |
| C  | -3.31654900 | -0.18046800 | 4.46123900  | C                                         | 7.85774100 | 3.36522200  | 0.46865600  |
| H  | -2.32701600 | 1.72986600  | 4.63988800  | H                                         | 6.90246200 | 3.45472400  | 2.38930200  |
| H  | -4.08730000 | -2.16103200 | 4.07474600  | C                                         | 7.08948600 | 1.63620400  | -1.02408600 |
| H  | -4.03231100 | 0.02820800  | 5.25240700  | H                                         | 5.55277500 | 0.34634600  | -0.27559900 |
| Pd | -0.53452400 | -0.83760400 | 0.44823700  | C                                         | 7.92972400 | 2.72127800  | -0.76714500 |
| P  | 2.19017200  | 2.01074200  | 1.92190200  | H                                         | 8.50963100 | 4.20842000  | 0.68295300  |
| C  | 2.46910500  | 4.62094100  | 1.28102400  | H                                         | 7.13790600 | 1.12265700  | -1.98088600 |

|   |             |             |             |                                           |             |             |             |
|---|-------------|-------------|-------------|-------------------------------------------|-------------|-------------|-------------|
| H | 8.63550600  | 3.05832300  | -1.52149500 | H                                         | -3.48770200 | 5.52288200  | 2.09572400  |
| C | 4.61044500  | 2.65534500  | 3.55185200  | Pd                                        | 0.06852800  | 0.19550400  | 0.12515600  |
| C | 4.13190000  | 3.87624500  | 3.04390200  | P                                         | -1.52683600 | -0.13983500 | -1.46867000 |
| C | 4.79583900  | 2.53356900  | 4.93739100  | C                                         | -3.60471800 | 1.27074000  | -2.41981900 |
| C | 3.84432700  | 4.93954000  | 3.89913600  | H                                         | -4.16868600 | 0.44756300  | -1.97136700 |
| H | 3.99421400  | 4.00128300  | 1.97314700  | H                                         | -4.04264900 | 2.21793200  | -2.09041100 |
| C | 4.50912400  | 3.59831900  | 5.79648900  | C                                         | 0.22272900  | 0.25785800  | -3.48105700 |
| H | 5.16823900  | 1.59659800  | 5.34425300  | H                                         | -0.26726200 | 1.17562400  | -3.82726700 |
| C | 4.03133200  | 4.80176400  | 5.27812700  | H                                         | 0.99104700  | 0.53946600  | -2.75143900 |
| H | 3.47459700  | 5.87648000  | 3.49061700  | O                                         | -2.51943100 | -1.21994400 | -1.12987900 |
| H | 4.65907300  | 3.48577000  | 6.86705400  | O                                         | -0.75646800 | -0.59198300 | -2.85180600 |
| H | 3.80591300  | 5.63122000  | 5.94330400  | O                                         | -2.26220400 | 1.27192200  | -1.87867700 |
| C | 0.90147400  | -3.44214700 | -0.29898800 | C                                         | -3.60076300 | 1.16929600  | -3.93904500 |
| C | -0.09463100 | -3.69016300 | -1.25989500 | H                                         | -3.01250200 | 1.98111100  | -4.38055700 |
| C | 2.06446200  | -4.22749800 | -0.30303300 | H                                         | -4.62647500 | 1.24110500  | -4.32159700 |
| C | 0.07375300  | -4.71118000 | -2.19527300 | H                                         | -3.17800300 | 0.21402600  | -4.26547500 |
| H | -0.99648000 | -3.08440300 | -1.28497900 | C                                         | 0.83038200  | -0.51205700 | -4.64152900 |
| C | 2.23027000  | -5.24195200 | -1.24862100 | H                                         | 1.57868300  | 0.10611600  | -5.15110800 |
| H | 2.84955400  | -4.06048400 | 0.42714700  | H                                         | 0.05990600  | -0.79307100 | -5.36721900 |
| C | 1.23495500  | -5.48728500 | -2.19499200 | H                                         | 1.31606500  | -1.42650100 | -4.28536900 |
| H | -0.70405900 | -4.89131000 | -2.93223200 |                                           |             |             |             |
| H | 3.13753100  | -5.84050200 | -1.24022000 |                                           |             |             |             |
| H | 1.36463400  | -6.27741600 | -2.92991600 | <b>TS7d</b>                               |             |             |             |
| C | -0.61004000 | -2.76938200 | 2.10624600  | SCF energy: -2964.977405                  |             |             |             |
| C | -0.23967700 | -3.50444000 | 3.24358600  | SCF energy in solution: -2964.1373522000  |             |             |             |
| C | -1.97461100 | -2.55480400 | 1.84474000  | Free energy in solution: -2963.5014402000 |             |             |             |
| C | -1.21174200 | -4.00666200 | 4.10986900  | P                                         | 0.46434000  | 0.74662200  | 0.07299700  |
| H | 0.80627200  | -3.69458500 | 3.46482400  | C                                         | -3.96678900 | -0.57579800 | -1.67961200 |
| C | -2.94229200 | -3.07040000 | 2.70982900  | H                                         | -4.69653900 | -1.07767800 | -2.32720200 |
| H | -2.27961400 | -2.00640600 | 0.95583800  | H                                         | -3.60767300 | 0.30396900  | -2.22907900 |
| C | -2.56553000 | -3.79002000 | 3.84487000  | C                                         | -1.06169300 | 0.30340800  | -0.90338200 |
| H | -0.90975500 | -4.56993800 | 4.98902800  | H                                         | -1.78712100 | 1.11820200  | -0.79612000 |
| H | -3.99412100 | -2.90463700 | 2.49243400  | H                                         | -0.76515600 | 0.25302700  | -1.95857700 |
| H | -3.32174000 | -4.18321600 | 4.51929900  | C                                         | -2.79420400 | -1.53709600 | -1.40663500 |
| O | 1.01040300  | 2.62896700  | -0.82300600 | H                                         | -2.34058700 | -1.80075300 | -2.37210100 |
| C | 0.03132300  | 2.18790100  | -0.24589700 | H                                         | -3.19102500 | -2.47098700 | -0.99014500 |
| C | -0.97516300 | 3.09811200  | 0.39547400  | C                                         | -1.69081500 | -1.02698800 | -0.46244500 |
| C | -2.04591000 | 2.59262100  | 1.14321900  | H                                         | -2.09119300 | -0.90849700 | 0.55014300  |
| C | -0.81371900 | 4.48726500  | 0.26634700  | H                                         | -0.91689600 | -1.80179400 | -0.40270700 |
| C | -2.94605400 | 3.46346700  | 1.75705200  | P                                         | -4.81634800 | 0.07491600  | -0.13077000 |
| H | -2.16827600 | 1.51627100  | 1.23272000  | C                                         | -6.35159500 | 0.83185900  | -0.83707400 |
| C | -1.71684700 | 5.35543400  | 0.87342500  | C                                         | -7.40978600 | 1.12413400  | 0.04376700  |
| H | 0.02402500  | 4.86059700  | -0.31449300 | C                                         | -6.47934400 | 1.22894300  | -2.17734500 |
| C | -2.78356900 | 4.84426800  | 1.62100800  | C                                         | -8.55999700 | 1.77082500  | -0.40339200 |
| H | -3.77526800 | 3.06627800  | 2.33622200  | H                                         | -7.33459400 | 0.83421000  | 1.08917300  |
| H | -1.59270100 | 6.43006300  | 0.76742600  | C                                         | -7.62974100 | 1.88577600  | -2.62452800 |

|   |             |             |             |                                           |             |             |             |
|---|-------------|-------------|-------------|-------------------------------------------|-------------|-------------|-------------|
| H | -5.68423200 | 1.02782200  | -2.88849900 | H                                         | 3.07583200  | -3.63054800 | 0.16686000  |
| C | -8.67466400 | 2.15627600  | -1.74214100 | C                                         | 5.75696400  | -3.74750200 | -1.92441800 |
| H | -9.36726200 | 1.97747200  | 0.29465200  | H                                         | 6.10117900  | -2.41398900 | -3.58705700 |
| H | -7.70675000 | 2.18118900  | -3.66794700 | H                                         | 5.15292100  | -4.92676500 | -0.22080600 |
| H | -9.56928900 | 2.66486300  | -2.09117800 | H                                         | 6.66391600  | -4.32078600 | -2.09701800 |
| C | -5.47554900 | -1.49916500 | 0.59643400  | Pd                                        | 2.27617400  | -0.63215900 | -0.48040500 |
| C | -6.44158500 | -2.30083600 | -0.03520900 | P                                         | 3.83111300  | 0.47587400  | 0.96055400  |
| C | -4.96099900 | -1.91650600 | 1.83375800  | C                                         | 5.93754100  | -0.48742800 | 2.32672500  |
| C | -6.87417800 | -3.48939200 | 0.55209100  | H                                         | 5.38707200  | -0.02565200 | 3.15263900  |
| H | -6.86614800 | -1.98631200 | -0.98499100 | H                                         | 6.20509200  | -1.51029200 | 2.61444500  |
| C | -5.39082000 | -3.10947800 | 2.42162800  | C                                         | 5.17677600  | 1.56006900  | -1.10822100 |
| H | -4.22278100 | -1.30040800 | 2.34190300  | H                                         | 5.97957700  | 0.81202700  | -1.06284800 |
| C | -6.34752800 | -3.89740300 | 1.78144700  | H                                         | 4.41320200  | 1.18755600  | -1.80772200 |
| H | -7.62358500 | -4.09805300 | 0.05237200  | O                                         | 3.34440500  | 1.03221500  | 2.27572100  |
| H | -4.98155900 | -3.41804400 | 3.38008200  | O                                         | 4.60512700  | 1.73925700  | 0.18880200  |
| H | -6.68626000 | -4.82355000 | 2.23840800  | O                                         | 5.05995900  | -0.62115400 | 1.19018600  |
| C | 0.73641600  | 2.53082600  | -0.27182800 | C                                         | 7.18579400  | 0.31804900  | 1.98624200  |
| C | 1.55737800  | 3.27242100  | 0.59630000  | H                                         | 7.71742200  | -0.13116900 | 1.13971800  |
| C | 0.18305300  | 3.15675600  | -1.40020200 | H                                         | 7.86726000  | 0.34188900  | 2.84617100  |
| C | 1.79609000  | 4.62266500  | 0.34127400  | H                                         | 6.92151400  | 1.34724900  | 1.72550900  |
| H | 2.02664900  | 2.78846100  | 1.44938300  | C                                         | 5.71192700  | 2.90264500  | -1.58284900 |
| C | 0.43205200  | 4.50778700  | -1.64985300 | H                                         | 6.15409800  | 2.80794300  | -2.58202100 |
| H | -0.44632700 | 2.60188300  | -2.08879100 | H                                         | 6.48059500  | 3.27486400  | -0.89734300 |
| C | 1.23514400  | 5.24364600  | -0.77737900 | H                                         | 4.90527200  | 3.64189400  | -1.62521400 |
| H | 2.43189600  | 5.18663000  | 1.01796000  |                                           |             |             |             |
| H | -0.00608700 | 4.98261900  | -2.52376400 |                                           |             |             |             |
| H | 1.42638200  | 6.29591700  | -0.97088600 | <b>10d</b>                                |             |             |             |
| C | -0.12112700 | 0.67330600  | 1.81098900  | SCF energy: -2964.997402                  |             |             |             |
| C | -1.18858500 | 1.48697000  | 2.22539300  | SCF energy in solution: -2964.1551368300  |             |             |             |
| C | 0.44812500  | -0.22933200 | 2.71759100  | Free energy in solution: -2963.5203168300 |             |             |             |
| C | -1.68505200 | 1.38656600  | 3.52431100  | P                                         | 0.46880200  | 0.67065000  | 0.10419500  |
| H | -1.63272600 | 2.20191800  | 1.53848000  | C                                         | -4.00262700 | -0.50841500 | -1.68424500 |
| C | -0.05175100 | -0.32706700 | 4.01774400  | H                                         | -4.73198100 | -0.96516400 | -2.36480400 |
| H | 1.29983300  | -0.82907300 | 2.41802000  | H                                         | -3.62191200 | 0.39094300  | -2.18501500 |
| C | -1.11805300 | 0.47667000  | 4.42139300  | C                                         | -1.07492800 | 0.27908400  | -0.88039600 |
| H | -2.51088600 | 2.02041000  | 3.83533600  | H                                         | -1.78151700 | 1.10639500  | -0.75063400 |
| H | 0.40460100  | -1.02232400 | 4.71674200  | H                                         | -0.78727000 | 0.25532400  | -1.93965200 |
| H | -1.50257000 | 0.40268800  | 5.43527500  | C                                         | -2.85039900 | -1.50236500 | -1.44487900 |
| O | 1.01012300  | -2.54869800 | -2.52373200 | H                                         | -2.40121500 | -1.73859000 | -2.42020900 |
| C | 1.63839200  | -1.92763600 | -1.75142300 | H                                         | -3.26585600 | -2.44351400 | -1.06452100 |
| C | 3.42380700  | -2.27378600 | -1.48098900 | C                                         | -1.74086900 | -1.04603700 | -0.47949100 |
| C | 4.27568000  | -1.94136300 | -2.54649300 | H                                         | -2.14537900 | -0.94316200 | 0.53277400  |
| C | 3.73962200  | -3.35971000 | -0.64999500 | H                                         | -0.99172500 | -1.84668800 | -0.42584700 |
| C | 5.44139900  | -2.67462300 | -2.76363300 | P                                         | -4.86226200 | 0.07563400  | -0.11381700 |
| H | 4.02216500  | -1.11842200 | -3.20981200 | C                                         | -6.37847900 | 0.88663400  | -0.80009700 |
| C | 4.90658200  | -4.09089700 | -0.87010200 | C                                         | -7.45096900 | 1.13337100  | 0.07729200  |

|   |             |             |             |                                           |             |             |             |
|---|-------------|-------------|-------------|-------------------------------------------|-------------|-------------|-------------|
| C | -6.47668700 | 1.36799300  | -2.11501400 | C                                         | 4.30787900  | -3.07051600 | -0.36820300 |
| C | -8.58660600 | 1.81835200  | -0.34978300 | C                                         | 5.65091500  | -2.63120800 | -2.77085400 |
| H | -7.39877400 | 0.77745700  | 1.10348600  | H                                         | 4.38735200  | -0.91088400 | -2.99613900 |
| C | -7.61261900 | 2.06284700  | -2.54148000 | C                                         | 5.31238900  | -3.94996100 | -0.78267200 |
| H | -5.66948200 | 1.20459300  | -2.82240600 | H                                         | 3.80891100  | -3.24999800 | 0.58082600  |
| C | -8.67202800 | 2.28819000  | -1.66345100 | C                                         | 5.99069500  | -3.73163400 | -1.98408700 |
| H | -9.40533900 | 1.98870800  | 0.34463300  | H                                         | 6.16713300  | -2.45095200 | -3.71136500 |
| H | -7.66689800 | 2.42375500  | -3.56548900 | H                                         | 5.56777500  | -4.80473600 | -0.16013500 |
| H | -9.55526700 | 2.82656500  | -1.99650100 | H                                         | 6.77362500  | -4.41448500 | -2.30410400 |
| C | -5.54781600 | -1.52601000 | 0.52259600  | Pd                                        | 2.36017000  | -0.75094200 | -0.57283400 |
| C | -6.51449200 | -2.28186300 | -0.16197500 | P                                         | 3.80355800  | 0.42040400  | 0.87221800  |
| C | -5.05154700 | -2.01403700 | 1.74123300  | C                                         | 5.92610500  | -0.24129200 | 2.36088400  |
| C | -6.96602400 | -3.49540600 | 0.35562600  | H                                         | 5.25198800  | 0.04392000  | 3.17424800  |
| H | -6.92487400 | -1.91178700 | -1.09795600 | H                                         | 6.37509500  | -1.21091500 | 2.59905400  |
| C | -5.50041800 | -3.23206700 | 2.25921600  | C                                         | 5.03390800  | 1.67258100  | -1.18588600 |
| H | -4.31266100 | -1.43393800 | 2.28926800  | H                                         | 5.83997000  | 0.93042300  | -1.14410100 |
| C | -6.45763500 | -3.97408400 | 1.56704200  | H                                         | 4.31066100  | 1.34437900  | -1.94434200 |
| H | -7.71569000 | -4.06830300 | -0.18423100 | O                                         | 3.17904800  | 0.90408500  | 2.15410200  |
| H | -5.10566900 | -3.59631800 | 3.20409500  | O                                         | 4.38082400  | 1.75679600  | 0.08864900  |
| H | -6.81091900 | -4.91968400 | 1.96984600  | O                                         | 5.15330600  | -0.47059000 | 1.16200400  |
| C | 0.69680800  | 2.47621100  | -0.17389300 | C                                         | 7.00278600  | 0.81475600  | 2.14713400  |
| C | 1.43210400  | 3.23051000  | 0.75645200  | H                                         | 7.65543600  | 0.53773700  | 1.31196900  |
| C | 0.19802000  | 3.10623700  | -1.32582200 | H                                         | 7.61991500  | 0.90986800  | 3.04932900  |
| C | 1.63774000  | 4.59308900  | 0.54202300  | H                                         | 6.55413700  | 1.78909600  | 1.93129600  |
| H | 1.86459300  | 2.74302800  | 1.62509200  | C                                         | 5.57249400  | 3.05261000  | -1.52770400 |
| C | 0.41550000  | 4.46922200  | -1.53688500 | H                                         | 6.05881100  | 3.03762600  | -2.51020700 |
| H | -0.36685200 | 2.54602400  | -2.06459300 | H                                         | 6.30603600  | 3.37727500  | -0.78238900 |
| C | 1.13121500  | 5.21650100  | -0.60069900 | H                                         | 4.75953800  | 3.78571500  | -1.55080400 |
| H | 2.20603100  | 5.16601000  | 1.26956900  |                                           |             |             |             |
| H | 0.01966900  | 4.94459700  | -2.43043600 |                                           |             |             |             |
| H | 1.29670800  | 6.27838200  | -0.76297000 | <b>11d</b>                                |             |             |             |
| C | -0.13319200 | 0.51964300  | 1.83298300  | SCF energy: -2965.001007                  |             |             |             |
| C | -1.18933800 | 1.32475000  | 2.28939200  | SCF energy in solution: -2964.1602909000  |             |             |             |
| C | 0.40733300  | -0.45153900 | 2.68523500  | Free energy in solution: -2963.5231519000 |             |             |             |
| C | -1.70105900 | 1.15173600  | 3.57518200  | P                                         | -2.30557500 | -1.42934200 | 0.06857600  |
| H | -1.61316400 | 2.08989100  | 1.64493400  | C                                         | 2.33376700  | -1.66620700 | 0.60296300  |
| C | -0.10823200 | -0.62393000 | 3.97113100  | H                                         | 2.81936500  | -2.57630000 | 0.97797200  |
| H | 1.24920800  | -1.04898500 | 2.35421500  | H                                         | 1.94372400  | -1.11078300 | 1.46098800  |
| C | -1.16230300 | 0.17449200  | 4.41665600  | C                                         | -1.25928300 | -2.93417300 | -0.31303400 |
| H | -2.51763400 | 1.78080200  | 3.91878300  | H                                         | -1.82489700 | -3.81571900 | 0.01083900  |
| H | 0.32486400  | -1.37394200 | 4.62717700  | H                                         | -1.14568900 | -2.99362800 | -1.40327100 |
| H | -1.55922500 | 0.04254000  | 5.41977000  | C                                         | 1.15524200  | -2.00386900 | -0.31746900 |
| O | 0.92767800  | -2.52522900 | -2.69802400 | H                                         | 1.50328200  | -2.47902900 | -1.24590000 |
| C | 1.37696400  | -1.85724500 | -1.88560300 | H                                         | 0.67496700  | -1.05984300 | -0.61044900 |
| C | 3.96417500  | -1.95657500 | -1.14701400 | C                                         | 0.12509800  | -2.91785300 | 0.36689200  |
| C | 4.63885500  | -1.75570200 | -2.35893100 | H                                         | 0.50754200  | -3.94710800 | 0.38296300  |

|   |             |             |             |                                           |             |             |             |
|---|-------------|-------------|-------------|-------------------------------------------|-------------|-------------|-------------|
| H | 0.01256500  | -2.26218700 | 1.41804400  | O                                         | -1.82651900 | -0.26135900 | -3.86999500 |
| P | 3.58295100  | -0.53958800 | -0.23441500 | C                                         | -1.65927400 | -0.01859200 | -2.76618300 |
| C | 4.58279900  | 0.00827800  | 1.22794200  | C                                         | -0.44990800 | 2.25073000  | -1.87817800 |
| C | 3.91604300  | 0.63276200  | 2.29987700  | C                                         | -1.23152100 | 3.35241100  | -2.25321700 |
| C | 5.98480500  | -0.05468400 | 1.25893200  | C                                         | 0.90023400  | 2.22036800  | -2.25600100 |
| C | 4.63513400  | 1.14579000  | 3.37995400  | C                                         | -0.67195000 | 4.40970100  | -2.97876900 |
| H | 2.83221400  | 0.72635500  | 2.29328000  | H                                         | -2.28206900 | 3.40218700  | -1.97653800 |
| C | 6.70078500  | 0.46706300  | 2.33921200  | C                                         | 1.45868900  | 3.28148000  | -2.98005300 |
| H | 6.52552500  | -0.51827000 | 0.43938100  | H                                         | 1.53569300  | 1.38346800  | -1.97478600 |
| C | 6.02957000  | 1.06398400  | 3.40659900  | C                                         | 0.67588600  | 4.37852000  | -3.34323100 |
| H | 4.10074100  | 1.61423900  | 4.20290700  | H                                         | -1.29373300 | 5.25741900  | -3.25858200 |
| H | 7.78627000  | 0.40223600  | 2.34458100  | H                                         | 2.51059500  | 3.24551800  | -3.25474300 |
| H | 6.58678100  | 1.46638300  | 4.24871800  | H                                         | 1.11056900  | 5.20046200  | -3.90639400 |
| C | 4.68637900  | -1.77225800 | -1.07425800 | Pd                                        | -1.29354600 | 0.61398700  | -0.91310100 |
| C | 4.93903500  | -1.59700900 | -2.44329800 | P                                         | -0.65222900 | 1.63091700  | 1.10640000  |
| C | 5.25450700  | -2.88521100 | -0.42929400 | C                                         | 1.16885700  | 3.60455200  | 1.03135400  |
| C | 5.72997400  | -2.50586400 | -3.15220100 | H                                         | 1.64606200  | 3.20347000  | 1.93104700  |
| H | 4.51022100  | -0.73976000 | -2.95661400 | H                                         | 1.67363200  | 3.18574200  | 0.15497700  |
| C | 6.04513100  | -3.79356900 | -1.13272300 | C                                         | -3.05399900 | 2.70573000  | 1.64004500  |
| H | 5.08821100  | -3.03550400 | 0.63429700  | H                                         | -2.66732600 | 3.73097500  | 1.64497600  |
| C | 6.28303800  | -3.60647000 | -2.49790500 | H                                         | -3.37992100 | 2.47255800  | 0.61464700  |
| H | 5.91270200  | -2.35230500 | -4.21268500 | O                                         | 0.36251500  | 0.80303500  | 1.85531900  |
| H | 6.47775800  | -4.64727500 | -0.61688100 | O                                         | -2.00804100 | 1.80463200  | 2.03006100  |
| H | 6.89859600  | -4.31527700 | -3.04584700 | O                                         | -0.21962600 | 3.21128900  | 1.02063900  |
| C | -3.86959900 | -1.71301200 | -0.86838100 | C                                         | 1.21991000  | 5.12234300  | 1.00253200  |
| C | -4.79226000 | -0.65295800 | -0.93085700 | H                                         | 0.75451900  | 5.50505100  | 0.08867900  |
| C | -4.17113800 | -2.90633800 | -1.54148000 | H                                         | 2.26233500  | 5.46065400  | 1.02975300  |
| C | -5.98604000 | -0.78649700 | -1.63819300 | H                                         | 0.69541300  | 5.54540800  | 1.86605500  |
| H | -4.57051400 | 0.28295500  | -0.42359700 | C                                         | -4.20681500 | 2.54643300  | 2.61801600  |
| C | -5.36350500 | -3.03484500 | -2.25999500 | H                                         | -5.02365800 | 3.22869500  | 2.35436000  |
| H | -3.48301100 | -3.74486800 | -1.51302800 | H                                         | -3.87849800 | 2.77593900  | 3.63679500  |
| C | -6.27308600 | -1.97861300 | -2.30862700 | H                                         | -4.58858400 | 1.52015800  | 2.60629700  |
| H | -6.68755800 | 0.04252600  | -1.67326300 |                                           |             |             |             |
| H | -5.57870700 | -3.96466500 | -2.77955400 |                                           |             |             |             |
| H | -7.19884200 | -2.08093100 | -2.86798300 | <b>TS8d</b>                               |             |             |             |
| C | -2.78823100 | -1.73062700 | 1.82578200  | SCF energy: -2964.982455                  |             |             |             |
| C | -3.95770200 | -2.44457000 | 2.13850100  | SCF energy in solution: -2964.154778      |             |             |             |
| C | -1.94474200 | -1.30731300 | 2.86657300  | Free energy in solution: -2963.5122944900 |             |             |             |
| C | -4.27579000 | -2.73316900 | 3.46583600  | P                                         | 1.59854400  | 1.46185500  | -0.64044100 |
| H | -4.62452600 | -2.77661400 | 1.34917000  | C                                         | -1.80343800 | 2.83602200  | -0.30548000 |
| C | -2.26723600 | -1.60825100 | 4.19176800  | H                                         | -2.69896400 | 3.37096100  | 0.03065500  |
| H | -1.05082000 | -0.72816400 | 2.65516400  | H                                         | -1.03354500 | 3.04930900  | 0.44451200  |
| C | -3.42939600 | -2.31779900 | 4.49576900  | C                                         | 1.14890900  | 2.61857200  | -2.05887300 |
| H | -5.18572200 | -3.28278000 | 3.69239700  | H                                         | 2.08740500  | 3.08011000  | -2.38602800 |
| H | -1.60780700 | -1.27170100 | 4.98700600  | H                                         | 0.80816600  | 1.98428900  | -2.88586900 |
| H | -3.67857000 | -2.54204600 | 5.52967400  | C                                         | -1.35779800 | 3.33678800  | -1.70222000 |



|   |             |             |             |                                           |             |             |             |
|---|-------------|-------------|-------------|-------------------------------------------|-------------|-------------|-------------|
| H | -1.95767500 | 4.22230700  | -1.94607100 | C                                         | 2.43415300  | 4.54362200  | 2.74471600  |
| H | -1.59869900 | 2.60069000  | -2.48019800 | H                                         | 3.70437000  | 5.53061200  | 1.30404200  |
| C | 0.12015300  | 3.74132700  | -1.83008900 | H                                         | 1.13966200  | 3.32081400  | 3.96088400  |
| H | 0.20324100  | 4.40072700  | -2.70488600 | H                                         | 2.61936600  | 5.27317100  | 3.52873600  |
| H | 0.41422000  | 4.35195100  | -0.96763000 | O                                         | 0.76003100  | -1.14551100 | -3.46689600 |
| P | -2.12886200 | 0.99840500  | -0.17771500 | C                                         | 0.22559100  | -0.69149100 | -2.55703500 |
| C | -2.88298300 | 0.94641000  | 1.51601300  | C                                         | -1.11185400 | -2.25288500 | -0.26545600 |
| C | -2.06056000 | 0.63383200  | 2.60995600  | C                                         | -1.16944000 | -3.18157600 | -1.31771300 |
| C | -4.23012000 | 1.25952200  | 1.75429100  | C                                         | -1.93738600 | -2.48626700 | 0.84565100  |
| C | -2.56576000 | 0.65382700  | 3.91145400  | C                                         | -2.04289800 | -4.27651100 | -1.27842000 |
| H | -1.02477800 | 0.35189200  | 2.44109700  | H                                         | -0.53717300 | -3.07283200 | -2.19251000 |
| C | -4.73678200 | 1.27105000  | 3.05503500  | C                                         | -2.81610600 | -3.57242000 | 0.88469000  |
| H | -4.89047900 | 1.48736300  | 0.92298100  | H                                         | -1.89921500 | -1.82339100 | 1.70096700  |
| C | -3.90582100 | 0.97287100  | 4.13692100  | C                                         | -2.87778700 | -4.47400600 | -0.17992500 |
| H | -1.91355800 | 0.40672400  | 4.74492500  | H                                         | -2.06183200 | -4.97251300 | -2.11458700 |
| H | -5.78376100 | 1.51112100  | 3.22172400  | H                                         | -3.44891700 | -3.71408400 | 1.75828200  |
| H | -4.30286500 | 0.98072400  | 5.14855100  | H                                         | -3.55861200 | -5.32092100 | -0.14815900 |
| C | -3.57723600 | 0.75360300  | -1.30419400 | Pd                                        | 0.02416800  | -0.50419400 | -0.41595000 |
| C | -3.90080900 | -0.55576700 | -1.70186700 | P                                         | 1.49918700  | -1.46474300 | 1.10258800  |
| C | -4.36610400 | 1.81209100  | -1.78713100 | C                                         | 1.27235600  | -2.92859900 | 3.33505500  |
| C | -4.98527100 | -0.79628500 | -2.54682500 | H                                         | 1.76062500  | -2.04618600 | 3.76022600  |
| H | -3.30408900 | -1.38961800 | -1.34976100 | H                                         | 0.39553600  | -3.17242200 | 3.94485800  |
| C | -5.44680300 | 1.56951700  | -2.63780000 | C                                         | 2.42846900  | -3.41280700 | -0.52822900 |
| H | -4.14660200 | 2.83653900  | -1.50446500 | H                                         | 1.79452300  | -4.15613700 | -0.02981700 |
| C | -5.76071800 | 0.26411700  | -3.01876000 | H                                         | 1.88399500  | -3.03327300 | -1.40079400 |
| H | -5.21774100 | -1.81692400 | -2.83832100 | O                                         | 2.17929900  | -0.43822100 | 1.97539900  |
| H | -6.04243500 | 2.40323000  | -3.00080700 | O                                         | 2.70501400  | -2.33085900 | 0.37118200  |
| H | -6.60169000 | 0.07588500  | -3.68092500 | O                                         | 0.74747800  | -2.60162400 | 2.03126400  |
| C | 3.28966800  | 0.92699400  | -1.17100300 | C                                         | 2.23157500  | -4.11076800 | 3.27856700  |
| C | 4.25012300  | 0.58876200  | -0.20329300 | H                                         | 1.74624000  | -4.98055800 | 2.82239700  |
| C | 3.62151900  | 0.79909000  | -2.53006900 | H                                         | 2.54908700  | -4.38615200 | 4.29226700  |
| C | 5.51794500  | 0.15791500  | -0.59307700 | H                                         | 3.12184300  | -3.86083800 | 2.69364400  |
| H | 3.99091100  | 0.62794200  | 0.84900700  | C                                         | 3.75657200  | -4.01910000 | -0.95368100 |
| C | 4.89023900  | 0.35959900  | -2.91391200 | H                                         | 3.58801600  | -4.84124500 | -1.65936100 |
| H | 2.89950700  | 1.03890100  | -3.30397500 | H                                         | 4.30014400  | -4.41177700 | -0.08778900 |
| C | 5.84400800  | 0.04277600  | -1.94604200 | H                                         | 4.38358800  | -3.26390800 | -1.43879600 |
| H | 6.24956000  | -0.09935800 | 0.16806800  |                                           |             |             |             |
| H | 5.12951400  | 0.26928800  | -3.97031300 |                                           |             |             |             |
| H | 6.83292700  | -0.29557900 | -2.24429600 | <b>12d</b>                                |             |             |             |
| C | 1.95500300  | 2.65817700  | 0.71921000  | SCF energy: -2851.681221                  |             |             |             |
| C | 2.80604600  | 3.75311600  | 0.48978200  | SCF energy in solution: -2850.8730381800  |             |             |             |
| C | 1.36423100  | 2.51117800  | 1.97986200  | Free energy in solution: -2850.2340691800 |             |             |             |
| C | 3.04257100  | 4.68991800  | 1.49503300  | P                                         | -1.52964300 | -1.44239800 | -0.50692900 |
| H | 3.29778200  | 3.87070500  | -0.47199000 | C                                         | 1.70654000  | -2.91650200 | 0.67848700  |
| C | 1.60026000  | 3.45201500  | 2.98554100  | H                                         | 2.60749400  | -3.27407300 | 1.18956100  |
| H | 0.76076300  | 1.63700800  | 2.18506700  | H                                         | 0.93413600  | -2.84867200 | 1.45454000  |

|   |             |             |             |                          |                  |             |             |
|---|-------------|-------------|-------------|--------------------------|------------------|-------------|-------------|
| C | -0.97219500 | -3.00813500 | -1.39744100 | C                        | -3.95259000      | -3.76321600 | 1.94065500  |
| H | -1.88268700 | -3.43903600 | -1.82970000 | H                        | -3.28337900      | -3.84929000 | -0.09377900 |
| H | -0.37317800 | -2.66516000 | -2.25075100 | C                        | -3.19146500      | -1.87239200 | 3.23588500  |
| C | 1.28845700  | -3.91926300 | -0.41628200 | H                        | -1.93817000      | -0.45586300 | 2.21621100  |
| H | 1.69612200  | -4.89780300 | -0.13073100 | C                        | -3.92329900      | -3.05686100 | 3.14554400  |
| H | 1.76741800  | -3.67063000 | -1.37216000 | H                        | -4.52129200      | -4.68602100 | 1.86095700  |
| C | -0.21946200 | -4.10965700 | -0.63031500 | H                        | -3.16789400      | -1.31270700 | 4.16682700  |
| H | -0.34569100 | -5.03231500 | -1.21307200 | H                        | -4.46967700      | -3.42940600 | 4.00808200  |
| H | -0.70568400 | -4.29997800 | 0.33484300  | C                        | 1.33627200       | 1.95761300  | -0.45695700 |
| P | 2.05110500  | -1.14781200 | 0.16025300  | C                        | 1.26379400       | 2.53068700  | -1.74174400 |
| C | 2.86119300  | -0.58111700 | 1.72472900  | C                        | 2.24862000       | 2.51470500  | 0.45014400  |
| C | 2.03043800  | -0.13330000 | 2.76639800  | C                        | 2.10000300       | 3.58686100  | -2.11775400 |
| C | 4.24729200  | -0.62111700 | 1.92959900  | H                        | 0.53217900       | 2.16472000  | -2.45925600 |
| C | 2.57749500  | 0.24417700  | 3.99352800  | C                        | 3.08448400       | 3.57667500  | 0.07897000  |
| H | 0.95879900  | -0.03555500 | 2.60844600  | H                        | 2.31632900       | 2.13041100  | 1.46232700  |
| C | 4.79143500  | -0.23373200 | 3.15643600  | C                        | 3.02117800       | 4.11236800  | -1.20759100 |
| H | 4.90869700  | -0.94226700 | 1.13119300  | H                        | 2.02000800       | 4.00697600  | -3.11854700 |
| C | 3.95906500  | 0.19356800  | 4.19205100  | H                        | 3.78331800       | 3.98583900  | 0.80589600  |
| H | 1.92146300  | 0.59651900  | 4.78466400  | H                        | 3.66957800       | 4.93671400  | -1.49435400 |
| H | 5.86874100  | -0.26235200 | 3.29842300  | Pd                       | 0.12576400       | 0.29485700  | -0.16859800 |
| H | 4.38530000  | 0.49673500  | 5.14472100  | P                        | -1.39445200      | 1.85281700  | 0.64723900  |
| C | 3.41631300  | -1.32471100 | -1.07011600 | C                        | -0.78614100      | 4.48221300  | 0.65276400  |
| C | 3.54142600  | -0.35853200 | -2.08175400 | H                        | -0.77494500      | 4.30988900  | 1.73360200  |
| C | 4.32849900  | -2.39498300 | -1.04582600 | H                        | 0.24755900       | 4.53749900  | 0.29767100  |
| C | 4.55494300  | -0.45774500 | -3.03745500 | C                        | -4.08322100      | 2.14111900  | 0.41535100  |
| H | 2.85266700  | 0.47915800  | -2.11420300 | H                        | -3.87200400      | 3.19864300  | 0.22691400  |
| C | 5.33747700  | -2.49437800 | -2.00468900 | H                        | -4.80725700      | 1.80060600  | -0.33241400 |
| H | 4.26013100  | -3.15908500 | -0.27733200 | O                        | -1.25755900      | 1.90125100  | 2.15352600  |
| C | 5.45313000  | -1.52490800 | -3.00332000 | O                        | -2.89483300      | 1.36936400  | 0.15524500  |
| H | 4.63835900  | 0.30287500  | -3.80892500 | O                        | -1.43722900      | 3.37388000  | 0.00295000  |
| H | 6.03214800  | -3.32958000 | -1.97054200 | C                        | -1.54651000      | 5.75241100  | 0.30420200  |
| H | 6.23874900  | -1.60301500 | -3.75016200 | H                        | -1.57949800      | 5.89972900  | -0.78072900 |
| C | -2.75089500 | -0.90074000 | -1.78790500 | H                        | -1.05266000      | 6.62169000  | 0.75517000  |
| C | -4.12872500 | -1.13267200 | -1.69392200 | H                        | -2.57572600      | 5.70882400  | 0.67735300  |
| C | -2.24584000 | -0.26873000 | -2.93456200 | C                        | -4.62006800      | 1.92954800  | 1.82653400  |
| C | -4.98246500 | -0.74430500 | -2.72922800 | H                        | -5.55569800      | 2.48835100  | 1.95822300  |
| H | -4.54299300 | -1.60266600 | -0.80790300 | H                        | -3.89465300      | 2.27018500  | 2.57025300  |
| C | -3.09872600 | 0.11250700  | -3.97056200 | H                        | -4.82369100      | 0.86857000  | 2.00743300  |
| H | -1.18193800 | -0.05437000 | -3.01004400 |                          |                  |             |             |
| C | -4.47117900 | -0.12453100 | -3.87054500 |                          |                  |             |             |
| H | -6.05067600 | -0.92503700 | -2.63939800 | <b>TS9d</b>              |                  |             |             |
| H | -2.69132300 | 0.60423500  | -4.85002600 | SCF energy:              | -2851.656924     |             |             |
| H | -5.13797600 | 0.17777300  | -4.67362700 | SCF energy in solution:  | -2850.8539692300 |             |             |
| C | -2.50588600 | -2.09420000 | 0.91459200  | Free energy in solution: | -2850.2160232300 |             |             |
| C | -3.24855300 | -3.28622100 | 0.83450400  | P                        | -1.62252900      | -1.57244000 | -0.25017900 |
| C | -2.48480200 | -1.39076000 | 2.13053900  | C                        | 1.87278400       | -2.88165400 | 1.08966900  |

|   |             |             |             |    |             |             |             |
|---|-------------|-------------|-------------|----|-------------|-------------|-------------|
| H | 2.84420100  | -3.20366600 | 1.48416200  | H  | -2.79378000 | -0.54773100 | -4.94375500 |
| H | 1.23753500  | -2.71401100 | 1.96849100  | H  | -5.26035400 | -0.58919000 | -4.59997100 |
| C | -1.06979300 | -3.28612100 | -0.79374700 | C  | -2.64458600 | -1.92702300 | 1.24662300  |
| H | -1.97130000 | -3.83334000 | -1.09332400 | C  | -3.43561800 | -3.08296700 | 1.37588300  |
| H | -0.49229500 | -3.13299800 | -1.71408400 | C  | -2.61107500 | -1.00677700 | 2.30798300  |
| C | 1.27268000  | -3.99713400 | 0.20621200  | C  | -4.17448700 | -3.31455400 | 2.53645700  |
| H | 1.68076700  | -4.94471000 | 0.58227400  | H  | -3.48396500 | -3.80861200 | 0.56862100  |
| H | 1.63834100  | -3.91152000 | -0.82569200 | C  | -3.35759600 | -1.24086600 | 3.46692200  |
| C | -0.26157000 | -4.15196000 | 0.19646100  | H  | -2.00917600 | -0.10405800 | 2.22874400  |
| H | -0.46798900 | -5.19609700 | -0.07348000 | C  | -4.13632300 | -2.39231800 | 3.58560600  |
| H | -0.65076700 | -4.03204700 | 1.21583300  | H  | -4.77898000 | -4.21410100 | 2.62116800  |
| P | 2.10495500  | -1.18831500 | 0.32088400  | H  | -3.32344900 | -0.51765300 | 4.27740500  |
| C | 3.04251600  | -0.39208500 | 1.70820800  | H  | -4.71132700 | -2.57346000 | 4.49019200  |
| C | 2.29864700  | 0.27806700  | 2.69533300  | C  | 0.79457900  | 2.06054800  | -0.67875500 |
| C | 4.43790400  | -0.45270700 | 1.83710400  | C  | 0.66263400  | 2.25846800  | -2.07002500 |
| C | 2.93774900  | 0.85503600  | 3.79451800  | C  | 1.90728800  | 2.62534500  | -0.02479000 |
| H | 1.21935200  | 0.37345300  | 2.59169900  | C  | 1.64753500  | 2.93619900  | -2.79135800 |
| C | 5.07523600  | 0.13539100  | 2.93210700  | H  | -0.22079600 | 1.88795100  | -2.58294800 |
| H | 5.03308700  | -0.95273700 | 1.07879100  | C  | 2.88466900  | 3.31187000  | -0.74883400 |
| C | 4.32744400  | 0.78581900  | 3.91547400  | H  | 2.02051200  | 2.50560100  | 1.04835400  |
| H | 2.34696200  | 1.37017000  | 4.54741500  | C  | 2.76313500  | 3.46242600  | -2.13357200 |
| H | 6.15811900  | 0.08463300  | 3.01476800  | H  | 1.53606700  | 3.06654000  | -3.86538800 |
| H | 4.82551400  | 1.24280200  | 4.76670400  | H  | 3.74780500  | 3.72290900  | -0.23048000 |
| C | 3.38689500  | -1.47643300 | -0.98131400 | H  | 3.52452100  | 3.99991800  | -2.69299500 |
| C | 3.48683800  | -0.52432500 | -2.01054100 | Pd | 0.08195500  | 0.08564800  | -0.14524100 |
| C | 4.24870800  | -2.58584200 | -1.01056600 | P  | -1.07256000 | 2.10345900  | 0.38854500  |
| C | 4.43071600  | -0.67020800 | -3.02824800 | C  | -0.56074200 | 4.69422900  | 0.95295800  |
| H | 2.82101700  | 0.33330600  | -2.01398100 | H  | -0.71617000 | 4.39715200  | 1.99538400  |
| C | 5.18627800  | -2.73608100 | -2.03471300 | H  | 0.51909900  | 4.70979800  | 0.75651600  |
| H | 4.19763100  | -3.34239100 | -0.23350500 | C  | -3.64763100 | 2.54328100  | -0.43819800 |
| C | 5.28123900  | -1.77733000 | -3.04503400 | H  | -3.38222700 | 3.56125600  | -0.73214500 |
| H | 4.49454600  | 0.08054200  | -3.81147300 | H  | -4.26126400 | 2.09432400  | -1.22470700 |
| H | 5.84235100  | -3.60284600 | -2.04108100 | O  | -1.02444600 | 1.91285300  | 1.88762400  |
| H | 6.01083400  | -1.89508500 | -3.84196300 | O  | -2.45144500 | 1.72594900  | -0.42023200 |
| C | -2.85104200 | -1.26041400 | -1.60347800 | O  | -1.18414900 | 3.73664000  | 0.08767200  |
| C | -4.23999600 | -1.27604500 | -1.42017900 | C  | -1.17228700 | 6.05750100  | 0.66731900  |
| C | -2.34578900 | -0.98559000 | -2.88542400 | H  | -1.02572500 | 6.33662000  | -0.38152900 |
| C | -5.10141900 | -1.03235300 | -2.49425000 | H  | -0.70128100 | 6.82120300  | 1.29749300  |
| H | -4.65672200 | -1.47385200 | -0.43794600 | H  | -2.24762800 | 6.05367400  | 0.87564500  |
| C | -3.20491100 | -0.75437500 | -3.95881100 | C  | -4.37981800 | 2.52448300  | 0.89653100  |
| H | -1.27008800 | -0.93484000 | -3.03996700 | H  | -5.32000300 | 3.08446700  | 0.81397400  |
| C | -4.58883500 | -0.77606700 | -3.76612300 | H  | -3.77302200 | 2.97847400  | 1.68567400  |
| H | -6.17646300 | -1.04535000 | -2.33229600 | H  | -4.61281800 | 1.49698100  | 1.19475800  |
